# Supplementary material for: Dysbiotic gut microbiota causes transmissible Crohn's disease-like ileitis independent of failure in antimicrobial defence
Source: PubMed Central journal article supplement — Gut. 2015 Apr 17;65(2):225–37. doi: 10.1136/gutjnl-2015-309333 (PMC4752651; doi:10.1136/gutjnl-2015-309333), 2015-04-17
Supplement: gutjnl-2015-309333-s3.pdf [file gutjnl-2015-309333-s3.pdf]

**Supplementary Table 1: Members of the mouse gut microbiota unique to SPF or CONV housing conditions.** Only microorganisms that were exclusively found either in SPF or CONV TNF<sup>deltaARE</sup> mice are displayed. Analysis was performed using high-throughput 16S rRNA gene sequencing, FELASA-guided analysis or cultivation (yeast-specific Sabourand-agar). Sequencing was done as described in the supplementary methods (taxa with a sequence abundance >0.5% are shown). For FELASA analysis, results of three different analysis time points were considered (previous, during and after performing the experiments). Samples from sentinel mice were taken from intestinal content, fur swaps, organs and rectum swaps. Analysis was performed by an independent, certified lab according to FELASA recommendations from 2014. \*microorganisms generally regarded as pathogenic to rodents.<sup>69</sup>

| Housing | Taxon                             | relative abundance (% $\pm$ SD) | Lineage  | Method of analysis |
|---------|-----------------------------------|---------------------------------|----------|--------------------|
| SPF     | <i>unknown_Clostridiales</i>      | 2.4 $\pm$ 1.2                   | Bacteria | sequencing         |
|         | <i>unknown_Desulfovibrionales</i> | 0.5 $\pm$ 0.3                   | Bacteria | sequencing         |
| CONV    | <i>Helicobacteraceae</i> *        | 9.6 $\pm$ 3.4                   | Bacteria | sequencing         |
|         | <i>Bacteroidaceae</i>             | 5.5 $\pm$ 2.9                   | Bacteria | sequencing         |
|         | <i>Desulfovibrionaceae</i>        | 5.1 $\pm$ 1.6                   | Bacteria | sequencing         |
|         | <i>Verrucomicrobiaceae</i>        | 2.8 $\pm$ 1.6                   | Bacteria | sequencing         |
|         | <i>Prevotellaceae</i>             | 2.0 $\pm$ 1.0                   | Bacteria | sequencing         |
|         | <i>Deferribacteraceae</i>         | 1.5 $\pm$ 0.9                   | Bacteria | sequencing         |
|         | <i>DeFluviitaleaceae</i>          | 1.0 $\pm$ 0.7                   | Bacteria | sequencing         |
|         | <i>Sutterellaceae</i>             | 0.9 $\pm$ 0.4                   | Bacteria | sequencing         |
|         | <i>Bifidobacteriaceae</i>         | 0.8 $\pm$ 0.9                   | Bacteria | sequencing         |
|         | <i>Erysipelotrichaceae</i>        | 0.8 $\pm$ 0.7                   | Bacteria | sequencing         |
|         | <i>Clostridiaceae</i>             | 0.7 $\pm$ 1.1                   | Bacteria | sequencing         |
|         | <i>Peptostreptococcaceae</i>      | 0.6 $\pm$ 0.9                   | Bacteria | sequencing         |
|         | <i>Chlamydiaceae</i> *            | 0.6 $\pm$ 0.6                   | Bacteria | sequencing         |
|         | <i>Murine norovirus</i> *         | positive                        | Virus    | FELASA             |
|         | <i>Helicobacter spp.</i> *        | positive                        | Bacteria | FELASA             |
|         | <i>Pasteurella spp.</i> *         | positive                        | Bacteria | FELASA             |
|         | <i>Syphacia spp.</i> *            | positive                        | Animalia | FELASA             |
|         | <i>Trichomonas spp.</i> *         | positive                        | Animalia | FELASA             |
|         | <i>Candida tropicalis</i>         | positive                        | Fungi    | cultivation        |
|         | <i>Kazachstania heterogenica</i>  | positive                        | Fungi    | cultivation        |
