# Supplementary material for: Dysbiotic gut microbiota causes transmissible Crohn's disease-like ileitis independent of failure in antimicrobial defence
Source: HighWire-hosted journal article supplement (doi:10.1136/gutjnl-2015-309333), 2015-04-17
Supplement: gutjnl-2015-309333supp_table2.pdf [file gutjnl-2015-309333supp_table2.pdf]

|         |    |     |     |      |     |     |     |     |
|---------|----|-----|-----|------|-----|-----|-----|-----|
| OTU_145 | 74 | 10  | 0   | 0    | 11  | 0   | 14  | 25  |
| OTU_146 | 12 | 0   | 28  | 0    | 179 | 2   | 14  | 53  |
| OTU_147 | 90 | 24  | 44  | 180  | 85  | 48  | 70  | 152 |
| OTU_148 | 17 | 0   | 64  | 21   | 27  | 7   | 27  | 19  |
| OTU_149 | 8  | 28  | 0   | 10   | 2   | 0   | 29  | 2   |
| OTU_15  | 54 | 165 | 44  | 1556 | 405 | 316 | 188 | 125 |
| OTU_150 | 48 | 6   | 46  | 143  | 15  | 185 | 32  | 33  |
| OTU_151 | 0  | 5   | 0   | 113  | 30  | 0   | 0   | 10  |
| OTU_152 | 46 | 0   | 0   | 0    | 0   | 11  | 6   | 119 |
| OTU_153 | 0  | 0   | 0   | 7    | 0   | 0   | 0   | 0   |
| OTU_154 | 0  | 22  | 0   | 0    | 0   | 159 | 3   | 0   |
| OTU_155 | 0  | 0   | 0   | 0    | 0   | 0   | 0   | 0   |
| OTU_156 | 50 | 0   | 0   | 0    | 0   | 0   | 0   | 73  |
| OTU_157 | 0  | 0   | 18  | 41   | 30  | 27  | 48  | 13  |
| OTU_158 | 0  | 0   | 12  | 3    | 0   | 89  | 3   | 0   |
| OTU_159 | 0  | 0   | 0   | 0    | 0   | 0   | 0   | 0   |
| OTU_16  | 92 | 7   | 264 | 0    | 0   | 18  | 48  | 140 |
| OTU_160 | 0  | 3   | 15  | 2    | 3   | 7   | 0   | 0   |
| OTU_161 | 0  | 6   | 86  | 0    | 0   | 11  | 0   | 0   |
| OTU_162 | 8  | 9   | 47  | 40   | 3   | 54  | 0   | 14  |
| OTU_163 | 29 | 26  | 11  | 72   | 32  | 196 | 84  | 47  |
| OTU_165 | 0  | 9   | 108 | 36   | 131 | 11  | 0   | 2   |
| OTU_166 | 0  | 0   | 2   | 4    | 0   | 6   | 3   | 13  |
| OTU_167 | 0  | 0   | 0   | 0    | 0   | 0   | 140 | 2   |
| OTU_168 | 5  | 3   | 3   | 0    | 0   | 2   | 18  | 0   |
| OTU_169 | 4  | 84  | 0   | 0    | 14  | 0   | 2   | 17  |
| OTU_17  | 0  | 0   | 0   | 89   | 38  | 0   | 0   | 0   |
| OTU_170 | 0  | 2   | 0   | 0    | 0   | 14  | 4   | 17  |
| OTU_171 | 4  | 0   | 11  | 7    | 3   | 31  | 12  | 13  |
| OTU_172 | 33 | 4   | 2   | 82   | 4   | 0   | 0   | 6   |
| OTU_173 | 14 | 0   | 10  | 3    | 3   | 0   | 22  | 19  |
| OTU_174 | 91 | 128 | 0   | 0    | 0   | 0   | 22  | 0   |
| OTU_175 | 0  | 0   | 0   | 20   | 57  | 0   | 17  | 7   |
| OTU_177 | 13 | 0   | 0   | 0    | 0   | 0   | 0   | 0   |
| OTU_178 | 3  | 2   | 30  | 0    | 0   | 7   | 0   | 0   |
| OTU_179 | 0  | 0   | 0   | 0    | 0   | 0   | 0   | 0   |
| OTU_18  | 0  | 0   | 0   | 0    | 0   | 0   | 0   | 0   |
| OTU_181 | 0  | 0   | 0   | 5    | 0   | 0   | 0   | 0   |
| OTU_182 | 11 | 3   | 26  | 0    | 0   | 0   | 4   | 0   |
| OTU_183 | 0  | 5   | 0   | 0    | 0   | 0   | 9   | 0   |
| OTU_184 | 21 | 23  | 46  | 21   | 37  | 91  | 29  | 24  |
| OTU_185 | 37 | 4   | 17  | 7    | 4   | 138 | 47  | 38  |
| OTU_186 | 43 | 7   | 11  | 16   | 8   | 28  | 32  | 13  |
| OTU_187 | 9  | 6   | 50  | 22   | 39  | 9   | 5   | 24  |
| OTU_188 | 0  | 0   | 8   | 0    | 0   | 0   | 0   | 0   |
| OTU_189 | 32 | 28  | 43  | 45   | 0   | 148 | 2   | 162 |
| OTU_19  | 20 | 11  | 46  | 77   | 0   | 2   | 27  | 0   |
| OTU_190 | 2  | 7   | 3   | 0    | 3   | 0   | 0   | 0   |
| OTU_191 | 0  | 0   | 0   | 110  | 4   | 57  | 2   | 0   |
| OTU_192 | 6  | 2   | 6   | 5    | 10  | 3   | 8   | 15  |

|         |     |     |    |     |     |     |     |     |
|---------|-----|-----|----|-----|-----|-----|-----|-----|
| OTU_193 | 45  | 0   | 0  | 0   | 0   | 0   | 8   | 16  |
| OTU_194 | 68  | 31  | 40 | 5   | 8   | 50  | 31  | 40  |
| OTU_195 | 27  | 27  | 14 | 0   | 13  | 0   | 0   | 26  |
| OTU_196 | 19  | 0   | 41 | 65  | 38  | 21  | 10  | 54  |
| OTU_197 | 0   | 3   | 0  | 0   | 0   | 0   | 16  | 31  |
| OTU_198 | 0   | 0   | 0  | 52  | 0   | 52  | 0   | 6   |
| OTU_199 | 27  | 0   | 0  | 0   | 0   | 0   | 3   | 16  |
| OTU_2   | 153 | 0   | 0  | 0   | 0   | 0   | 20  | 0   |
| OTU_20  | 439 | 52  | 59 | 27  | 0   | 9   | 250 | 397 |
| OTU_200 | 0   | 38  | 0  | 7   | 7   | 4   | 0   | 0   |
| OTU_201 | 0   | 0   | 0  | 0   | 2   | 0   | 0   | 0   |
| OTU_202 | 3   | 14  | 0  | 27  | 34  | 0   | 0   | 0   |
| OTU_203 | 4   | 0   | 10 | 17  | 7   | 0   | 4   | 7   |
| OTU_204 | 0   | 0   | 0  | 0   | 0   | 0   | 0   | 0   |
| OTU_205 | 0   | 0   | 0  | 0   | 0   | 0   | 0   | 0   |
| OTU_206 | 5   | 9   | 23 | 15  | 15  | 26  | 0   | 8   |
| OTU_207 | 16  | 0   | 31 | 41  | 32  | 5   | 16  | 40  |
| OTU_208 | 0   | 0   | 0  | 5   | 0   | 0   | 0   | 0   |
| OTU_209 | 0   | 0   | 4  | 38  | 4   | 5   | 0   | 3   |
| OTU_21  | 47  | 15  | 62 | 554 | 113 | 401 | 103 | 33  |
| OTU_211 | 0   | 0   | 0  | 0   | 0   | 0   | 0   | 0   |
| OTU_212 | 15  | 13  | 14 | 42  | 41  | 126 | 6   | 16  |
| OTU_213 | 0   | 0   | 0  | 21  | 0   | 0   | 265 | 14  |
| OTU_214 | 0   | 0   | 0  | 0   | 0   | 0   | 0   | 0   |
| OTU_216 | 0   | 0   | 0  | 57  | 15  | 0   | 3   | 2   |
| OTU_218 | 42  | 31  | 60 | 26  | 2   | 47  | 2   | 30  |
| OTU_22  | 0   | 0   | 0  | 0   | 0   | 0   | 0   | 0   |
| OTU_220 | 15  | 23  | 2  | 39  | 8   | 31  | 15  | 38  |
| OTU_221 | 0   | 0   | 0  | 0   | 0   | 0   | 3   | 0   |
| OTU_222 | 0   | 0   | 0  | 0   | 0   | 0   | 0   | 60  |
| OTU_223 | 3   | 18  | 82 | 6   | 0   | 12  | 5   | 6   |
| OTU_224 | 11  | 22  | 0  | 0   | 0   | 0   | 35  | 4   |
| OTU_225 | 17  | 14  | 0  | 0   | 24  | 45  | 0   | 0   |
| OTU_226 | 0   | 0   | 0  | 0   | 0   | 0   | 0   | 0   |
| OTU_228 | 0   | 0   | 0  | 0   | 0   | 0   | 0   | 0   |
| OTU_229 | 8   | 16  | 0  | 0   | 2   | 6   | 8   | 7   |
| OTU_23  | 881 | 103 | 0  | 2   | 0   | 0   | 171 | 186 |
| OTU_230 | 0   | 0   | 0  | 3   | 0   | 0   | 2   | 0   |
| OTU_231 | 19  | 36  | 0  | 0   | 0   | 0   | 3   | 26  |
| OTU_232 | 0   | 0   | 0  | 0   | 0   | 0   | 0   | 0   |
| OTU_233 | 0   | 0   | 0  | 0   | 0   | 0   | 0   | 0   |
| OTU_234 | 24  | 0   | 0  | 0   | 0   | 0   | 0   | 0   |
| OTU_235 | 0   | 0   | 0  | 0   | 0   | 0   | 0   | 0   |
| OTU_236 | 0   | 0   | 19 | 24  | 2   | 0   | 40  | 3   |
| OTU_238 | 58  | 4   | 22 | 14  | 7   | 23  | 20  | 28  |
| OTU_239 | 0   | 0   | 0  | 0   | 0   | 0   | 9   | 21  |
| OTU_24  | 203 | 318 | 21 | 19  | 261 | 31  | 76  | 241 |
| OTU_240 | 4   | 0   | 0  | 0   | 0   | 0   | 0   | 17  |
| OTU_241 | 19  | 3   | 0  | 0   | 0   | 0   | 0   | 6   |
| OTU_243 | 16  | 10  | 2  | 0   | 9   | 27  | 7   | 3   |

|         |      |     |     |     |     |     |      |      |
|---------|------|-----|-----|-----|-----|-----|------|------|
| OTU_245 | 13   | 4   | 9   | 0   | 5   | 3   | 26   | 7    |
| OTU_246 | 0    | 0   | 17  | 0   | 0   | 0   | 0    | 0    |
| OTU_247 | 4    | 0   | 14  | 11  | 0   | 9   | 0    | 0    |
| OTU_25  | 0    | 2   | 0   | 0   | 0   | 0   | 17   | 0    |
| OTU_250 | 3    | 0   | 0   | 0   | 0   | 0   | 3    | 95   |
| OTU_251 | 23   | 13  | 0   | 2   | 26  | 76  | 23   | 58   |
| OTU_255 | 0    | 6   | 0   | 0   | 3   | 0   | 0    | 0    |
| OTU_256 | 0    | 0   | 0   | 66  | 0   | 14  | 0    | 23   |
| OTU_257 | 0    | 14  | 0   | 0   | 0   | 0   | 2    | 23   |
| OTU_26  | 6    | 81  | 136 | 41  | 6   | 853 | 5    | 8    |
| OTU_264 | 0    | 0   | 0   | 0   | 2   | 0   | 0    | 12   |
| OTU_267 | 0    | 0   | 0   | 0   | 0   | 0   | 2    | 30   |
| OTU_27  | 0    | 0   | 0   | 9   | 0   | 0   | 2    | 0    |
| OTU_272 | 2    | 0   | 5   | 9   | 0   | 0   | 6    | 2    |
| OTU_275 | 0    | 0   | 34  | 2   | 0   | 7   | 0    | 0    |
| OTU_28  | 267  | 0   | 0   | 0   | 0   | 0   | 24   | 0    |
| OTU_29  | 334  | 0   | 0   | 0   | 0   | 0   | 0    | 0    |
| OTU_295 | 0    | 0   | 0   | 0   | 0   | 0   | 0    | 0    |
| OTU_3   | 1932 | 872 | 422 | 51  | 200 | 425 | 1680 | 1122 |
| OTU_30  | 158  | 0   | 0   | 54  | 0   | 0   | 29   | 64   |
| OTU_300 | 0    | 14  | 6   | 2   | 6   | 0   | 0    | 4    |
| OTU_307 | 2    | 10  | 2   | 0   | 0   | 2   | 5    | 2    |
| OTU_31  | 203  | 29  | 78  | 401 | 25  | 292 | 36   | 93   |
| OTU_32  | 2    | 0   | 23  | 16  | 0   | 3   | 0    | 6    |
| OTU_320 | 12   | 0   | 2   | 0   | 0   | 0   | 0    | 3    |
| OTU_326 | 58   | 89  | 22  | 39  | 81  | 25  | 9    | 38   |
| OTU_33  | 8    | 134 | 4   | 0   | 6   | 3   | 15   | 7    |
| OTU_34  | 339  | 7   | 18  | 8   | 36  | 0   | 468  | 230  |
| OTU_35  | 0    | 0   | 0   | 125 | 54  | 0   | 0    | 16   |
| OTU_36  | 193  | 29  | 124 | 20  | 45  | 48  | 91   | 77   |
| OTU_37  | 0    | 0   | 0   | 0   | 0   | 2   | 0    | 31   |
| OTU_375 | 6    | 0   | 0   | 0   | 0   | 0   | 7    | 38   |
| OTU_377 | 0    | 0   | 0   | 11  | 0   | 0   | 0    | 0    |
| OTU_38  | 72   | 0   | 0   | 0   | 0   | 0   | 5    | 46   |
| OTU_380 | 0    | 26  | 0   | 29  | 6   | 0   | 2    | 0    |
| OTU_387 | 0    | 0   | 0   | 63  | 42  | 0   | 4    | 0    |
| OTU_39  | 0    | 0   | 0   | 2   | 0   | 0   | 0    | 0    |
| OTU_4   | 0    | 0   | 0   | 0   | 0   | 0   | 0    | 0    |
| OTU_40  | 2    | 60  | 0   | 0   | 0   | 0   | 12   | 21   |
| OTU_400 | 162  | 0   | 118 | 7   | 9   | 14  | 4    | 125  |
| OTU_403 | 9    | 10  | 86  | 6   | 14  | 35  | 6    | 8    |
| OTU_41  | 204  | 142 | 199 | 317 | 427 | 583 | 278  | 228  |
| OTU_411 | 0    | 0   | 62  | 0   | 0   | 29  | 0    | 0    |
| OTU_42  | 16   | 108 | 208 | 38  | 91  | 138 | 33   | 20   |
| OTU_43  | 114  | 0   | 0   | 78  | 30  | 0   | 13   | 64   |
| OTU_433 | 3    | 0   | 0   | 0   | 0   | 0   | 0    | 0    |
| OTU_436 | 6    | 114 | 5   | 0   | 55  | 0   | 3    | 0    |
| OTU_44  | 2    | 0   | 35  | 0   | 0   | 0   | 12   | 4    |
| OTU_445 | 4    | 0   | 3   | 0   | 0   | 0   | 8    | 2    |
| OTU_45  | 190  | 650 | 57  | 0   | 2   | 141 | 76   | 104  |

|         |      |     |      |     |     |     |     |     |
|---------|------|-----|------|-----|-----|-----|-----|-----|
| OTU_456 | 69   | 4   | 0    | 0   | 6   | 0   | 0   | 4   |
| OTU_457 | 0    | 0   | 0    | 0   | 0   | 0   | 0   | 0   |
| OTU_458 | 11   | 2   | 0    | 0   | 0   | 0   | 3   | 20  |
| OTU_46  | 0    | 0   | 58   | 0   | 0   | 62  | 12  | 6   |
| OTU_47  | 310  | 202 | 277  | 5   | 51  | 37  | 262 | 198 |
| OTU_475 | 0    | 2   | 27   | 25  | 0   | 0   | 12  | 2   |
| OTU_477 | 0    | 2   | 0    | 0   | 0   | 0   | 2   | 0   |
| OTU_48  | 67   | 203 | 80   | 91  | 284 | 260 | 42  | 76  |
| OTU_480 | 0    | 0   | 0    | 0   | 0   | 0   | 0   | 0   |
| OTU_481 | 0    | 0   | 0    | 0   | 0   | 0   | 0   | 0   |
| OTU_483 | 0    | 0   | 438  | 10  | 0   | 305 | 0   | 0   |
| OTU_484 | 0    | 32  | 0    | 4   | 2   | 0   | 0   | 0   |
| OTU_486 | 9    | 96  | 0    | 10  | 202 | 14  | 3   | 54  |
| OTU_49  | 0    | 5   | 0    | 0   | 0   | 393 | 0   | 0   |
| OTU_492 | 2    | 0   | 75   | 9   | 0   | 0   | 0   | 0   |
| OTU_5   | 135  | 2   | 197  | 318 | 469 | 358 | 408 | 568 |
| OTU_50  | 21   | 0   | 0    | 0   | 0   | 0   | 47  | 5   |
| OTU_508 | 0    | 0   | 0    | 8   | 24  | 0   | 0   | 0   |
| OTU_51  | 0    | 0   | 0    | 0   | 0   | 666 | 77  | 8   |
| OTU_513 | 6    | 8   | 17   | 4   | 11  | 8   | 3   | 19  |
| OTU_52  | 172  | 459 | 469  | 14  | 88  | 42  | 122 | 78  |
| OTU_526 | 5    | 22  | 10   | 12  | 5   | 9   | 38  | 56  |
| OTU_53  | 13   | 65  | 23   | 31  | 51  | 6   | 13  | 53  |
| OTU_538 | 4    | 5   | 16   | 0   | 0   | 0   | 13  | 8   |
| OTU_539 | 0    | 0   | 0    | 0   | 0   | 0   | 0   | 0   |
| OTU_54  | 42   | 2   | 0    | 9   | 19  | 0   | 0   | 28  |
| OTU_540 | 0    | 3   | 2    | 9   | 0   | 0   | 0   | 0   |
| OTU_544 | 4    | 12  | 2791 | 0   | 16  | 49  | 8   | 2   |
| OTU_547 | 0    | 0   | 111  | 0   | 0   | 18  | 0   | 0   |
| OTU_550 | 0    | 21  | 2    | 2   | 5   | 0   | 3   | 8   |
| OTU_553 | 2    | 0   | 100  | 51  | 50  | 0   | 0   | 6   |
| OTU_557 | 0    | 0   | 25   | 0   | 0   | 0   | 0   | 0   |
| OTU_56  | 17   | 0   | 0    | 9   | 11  | 0   | 5   | 11  |
| OTU_57  | 52   | 0   | 0    | 0   | 0   | 0   | 23  | 77  |
| OTU_572 | 0    | 0   | 0    | 0   | 0   | 0   | 0   | 0   |
| OTU_574 | 0    | 0   | 0    | 0   | 0   | 3   | 3   | 0   |
| OTU_58  | 7    | 0   | 0    | 0   | 44  | 0   | 0   | 0   |
| OTU_582 | 5    | 0   | 0    | 2   | 0   | 0   | 2   | 3   |
| OTU_587 | 115  | 127 | 0    | 0   | 0   | 0   | 4   | 12  |
| OTU_59  | 68   | 13  | 0    | 0   | 0   | 0   | 55  | 113 |
| OTU_6   | 3491 | 459 | 0    | 2   | 2   | 0   | 4   | 0   |
| OTU_60  | 8    | 99  | 0    | 25  | 67  | 2   | 0   | 0   |
| OTU_61  | 0    | 0   | 0    | 0   | 0   | 0   | 0   | 0   |
| OTU_62  | 7    | 2   | 250  | 12  | 0   | 7   | 42  | 7   |
| OTU_63  | 0    | 0   | 0    | 0   | 0   | 0   | 27  | 0   |
| OTU_64  | 6    | 127 | 0    | 10  | 0   | 29  | 0   | 2   |
| OTU_65  | 9    | 9   | 393  | 65  | 334 | 0   | 2   | 63  |
| OTU_66  | 0    | 0   | 0    | 0   | 0   | 0   | 2   | 0   |
| OTU_67  | 26   | 0   | 103  | 497 | 80  | 422 | 0   | 85  |
| OTU_68  | 141  | 84  | 0    | 0   | 122 | 0   | 104 | 58  |

|        |     |      |     |                    |             |             |             |             |
|--------|-----|------|-----|--------------------|-------------|-------------|-------------|-------------|
| OTU_69 | 245 | 145  | 0   | 0                  | 24          | 0           | 192         | 120         |
| OTU_7  | 0   | 0    | 0   | 76                 | 0           | 0           | 1077        | 48          |
| OTU_70 | 2   | 8    | 13  | 0                  | 50          | 0           | 4           | 0           |
| OTU_71 | 0   | 0    | 0   | 0                  | 2           | 0           | 0           | 0           |
| OTU_72 | 0   | 0    | 5   | 0                  | 0           | 0           | 0           | 30          |
| OTU_73 | 149 | 71   | 176 | 38                 | 56          | 101         | 106         | 161         |
| OTU_74 | 247 | 71   | 36  | 119                | 11          | 87          | 162         | 243         |
| OTU_75 | 47  | 3    | 6   | 3                  | 0           | 5           | 49          | 37          |
| OTU_76 | 0   | 0    | 0   | 281                | 0           | 39          | 3           | 18          |
| OTU_77 | 0   | 23   | 53  | 13                 | 9           | 74          | 2           | 0           |
| OTU_78 | 13  | 4    | 66  | 10                 | 2           | 51          | 7           | 2           |
| OTU_79 | 4   | 13   | 13  | 391                | 52          | 173         | 3           | 19          |
| OTU_8  | 566 | 1431 | 388 | 3                  | 0           | 3           | 466         | 262         |
| OTU_80 | 89  | 33   | 158 | 5                  | 340         | 77          | 105         | 12          |
| OTU_81 | 0   | 0    | 0   | 0                  | 0           | 0           | 0           | 2           |
| OTU_82 | 0   | 12   | 0   | 60                 | 12          | 66          | 6           | 2           |
| OTU_83 | 75  | 0    | 0   | 2                  | 92          | 0           | 0           | 66          |
| OTU_84 | 190 | 0    | 0   | 0                  | 0           | 0           | 0           | 0           |
| OTU_85 | 47  | 29   | 40  | 107                | 4           | 92          | 8           | 118         |
| OTU_86 | 3   | 0    | 0   | 70                 | 2           | 63          | 7           | 0           |
| OTU_87 | 4   | 0    | 0   | 0                  | 0           | 0           | 30          | 8           |
| OTU_88 | 6   | 0    | 0   | 94                 | 18          | 52          | 0           | 9           |
| OTU_89 | 8   | 0    | 0   | 14                 | 0           | 0           | 3           | 0           |
| OTU_9  | 0   | 70   | 0   | 152                | 644         | 121         | 3           | 0           |
| OTU_90 | 0   | 2    | 0   | 2                  | 0           | 0           | 0           | 0           |
| OTU_91 | 125 | 29   | 114 | 40                 | 26          | 9           | 11          | 139         |
| OTU_92 | 0   | 7    | 48  | 24                 | 88          | 5           | 0           | 0           |
| OTU_93 | 0   | 0    | 0   | 0                  | 0           | 0           | 0           | 74          |
| OTU_94 | 0   | 0    | 0   | 0                  | 0           | 0           | 0           | 0           |
| OTU_95 | 20  | 18   | 2   | 10                 | 25          | 194         | 58          | 77          |
| OTU_96 | 31  | 4    | 0   | 34                 | 4           | 0           | 3           | 2           |
| OTU_97 | 0   | 2    | 0   | 0                  | 0           | 0           | 0           | 0           |
| OTU_98 | 0   | 2    | 7   | 2                  | 3           | 6           | 2           | 0           |
| OTU_99 | 0   | 0    | 0   | 0                  | 0           | 0           | 0           | 0           |
|        |     |      |     | <b>Read per s:</b> | <b>4573</b> | <b>6598</b> | <b>6528</b> | <b>5683</b> |

| 353_wt_4 | 193_wt_12 | 197_wt_4 | 186_are_8 | 223_wt_8 | 223_wt_12 | 244_are_1 | 207_are_1 | 232_are_1 |
|----------|-----------|----------|-----------|----------|-----------|-----------|-----------|-----------|
| 0        | 0         | 0        | 219       | 0        | 0         | 1048      | 2972      | 2580      |
| 151      | 0         | 218      | 72        | 13       | 60        | 40        | 113       | 64        |
| 4        | 0         | 27       | 0         | 4        | 4         | 0         | 0         | 0         |
| 0        | 0         | 0        | 0         | 0        | 308       | 0         | 0         | 0         |
| 70       | 4         | 0        | 0         | 0        | 0         | 0         | 0         | 0         |
| 0        | 0         | 0        | 5         | 0        | 0         | 0         | 0         | 0         |
| 47       | 2         | 10       | 68        | 63       | 30        | 17        | 22        | 3         |
| 0        | 0         | 0        | 34        | 0        | 0         | 0         | 0         | 0         |
| 0        | 0         | 0        | 96        | 0        | 0         | 129       | 114       | 138       |
| 0        | 0         | 0        | 15        | 0        | 0         | 34        | 48        | 118       |
| 0        | 0         | 0        | 0         | 0        | 0         | 0         | 0         | 4         |
| 21       | 0         | 0        | 7         | 0        | 79        | 6         | 52        | 2         |
| 0        | 0         | 0        | 4         | 4        | 0         | 0         | 0         | 0         |
| 55       | 3         | 0        | 4         | 146      | 53        | 0         | 11        | 0         |
| 0        | 0         | 24       | 0         | 0        | 2         | 0         | 0         | 0         |
| 0        | 0         | 0        | 38        | 0        | 5         | 19        | 73        | 64        |
| 0        | 0         | 0        | 4         | 0        | 0         | 0         | 2         | 0         |
| 7        | 0         | 0        | 0         | 0        | 0         | 0         | 0         | 0         |
| 27       | 6         | 0        | 0         | 16       | 33        | 0         | 0         | 0         |
| 0        | 0         | 0        | 0         | 0        | 265       | 0         | 0         | 7         |
| 3        | 0         | 0        | 6         | 0        | 0         | 51        | 0         | 70        |
| 0        | 0         | 5        | 48        | 2        | 35        | 60        | 29        | 44        |
| 0        | 0         | 77       | 29        | 0        | 3         | 19        | 29        | 49        |
| 484      | 0         | 0        | 29        | 0        | 0         | 5         | 6         | 0         |
| 0        | 0         | 0        | 8         | 0        | 0         | 0         | 0         | 0         |
| 0        | 0         | 2        | 48        | 0        | 0         | 12        | 23        | 22        |
| 138      | 54        | 268      | 42        | 286      | 54        | 14        | 49        | 8         |
| 5        | 4         | 13       | 56        | 14       | 28        | 112       | 35        | 42        |
| 34       | 20        | 67       | 87        | 148      | 23        | 146       | 145       | 95        |
| 96       | 10        | 4        | 4         | 0        | 51        | 2         | 0         | 0         |
| 4        | 0         | 0        | 0         | 0        | 102       | 0         | 0         | 0         |
| 35       | 2         | 8        | 2         | 54       | 27        | 0         | 0         | 0         |
| 38       | 4         | 0        | 13        | 0        | 18        | 8         | 4         | 0         |
| 11       | 40        | 0        | 5         | 301      | 89        | 0         | 2         | 2         |
| 763      | 330       | 485      | 536       | 1010     | 602       | 130       | 262       | 121       |
| 8        | 2         | 63       | 31        | 0        | 2         | 19        | 18        | 147       |
| 18       | 0         | 0        | 42        | 0        | 32        | 24        | 3         | 50        |
| 16       | 0         | 0        | 0         | 0        | 8         | 3         | 0         | 0         |
| 4        | 0         | 0        | 22        | 0        | 0         | 0         | 0         | 44        |
| 0        | 0         | 0        | 121       | 0        | 0         | 12        | 6         | 28        |
| 0        | 0         | 0        | 0         | 0        | 0         | 288       | 179       | 0         |
| 0        | 0         | 0        | 9         | 0        | 0         | 12        | 0         | 0         |
| 0        | 0         | 0        | 0         | 0        | 5         | 0         | 0         | 4         |
| 20       | 3         | 82       | 9         | 8        | 3         | 37        | 20        | 8         |
| 0        | 0         | 3        | 4         | 0        | 0         | 47        | 11        | 0         |
| 13       | 2         | 0        | 22        | 6        | 8         | 6         | 24        | 29        |
| 0        | 0         | 6        | 7         | 0        | 0         | 0         | 2         | 0         |
| 239      | 0         | 2        | 8         | 200      | 54        | 0         | 0         | 0         |
| 78       | 0         | 0        | 0         | 0        | 2         | 0         | 0         | 0         |

|     |     |     |    |     |     |     |     |     |
|-----|-----|-----|----|-----|-----|-----|-----|-----|
| 0   | 0   | 0   | 71 | 0   | 0   | 32  | 49  | 82  |
| 0   | 0   | 10  | 16 | 0   | 0   | 13  | 43  | 29  |
| 0   | 4   | 13  | 64 | 74  | 36  | 139 | 122 | 84  |
| 308 | 25  | 199 | 26 | 5   | 305 | 18  | 27  | 27  |
| 0   | 0   | 3   | 4  | 5   | 13  | 0   | 9   | 4   |
| 0   | 7   | 49  | 53 | 5   | 28  | 32  | 163 | 65  |
| 0   | 6   | 44  | 4  | 3   | 9   | 64  | 63  | 10  |
| 50  | 0   | 3   | 0  | 32  | 14  | 0   | 0   | 0   |
| 0   | 0   | 0   | 14 | 0   | 25  | 0   | 31  | 22  |
| 16  | 2   | 0   | 0  | 0   | 2   | 30  | 0   | 3   |
| 0   | 6   | 70  | 3  | 0   | 0   | 0   | 44  | 0   |
| 0   | 0   | 0   | 0  | 0   | 0   | 0   | 0   | 0   |
| 0   | 0   | 0   | 0  | 0   | 0   | 0   | 0   | 117 |
| 2   | 0   | 5   | 21 | 5   | 3   | 18  | 7   | 12  |
| 13  | 2   | 2   | 0  | 4   | 5   | 0   | 0   | 0   |
| 0   | 0   | 0   | 0  | 0   | 2   | 0   | 0   | 0   |
| 0   | 0   | 19  | 32 | 0   | 0   | 276 | 64  | 92  |
| 2   | 7   | 8   | 0  | 21  | 15  | 0   | 0   | 0   |
| 0   | 0   | 29  | 0  | 0   | 0   | 0   | 0   | 0   |
| 0   | 0   | 0   | 11 | 0   | 2   | 13  | 4   | 0   |
| 0   | 0   | 96  | 36 | 3   | 0   | 59  | 67  | 12  |
| 139 | 30  | 16  | 0  | 116 | 59  | 0   | 2   | 0   |
| 45  | 0   | 10  | 9  | 9   | 43  | 0   | 3   | 3   |
| 0   | 0   | 0   | 3  | 0   | 0   | 0   | 6   | 0   |
| 0   | 2   | 0   | 5  | 0   | 0   | 14  | 0   | 0   |
| 0   | 0   | 0   | 55 | 0   | 0   | 64  | 17  | 15  |
| 0   | 0   | 0   | 0  | 0   | 0   | 0   | 0   | 0   |
| 0   | 0   | 9   | 3  | 0   | 0   | 0   | 6   | 16  |
| 0   | 3   | 0   | 0  | 17  | 10  | 0   | 0   | 0   |
| 35  | 0   | 0   | 18 | 4   | 145 | 0   | 9   | 6   |
| 20  | 0   | 0   | 9  | 2   | 6   | 30  | 18  | 3   |
| 0   | 0   | 0   | 58 | 0   | 0   | 0   | 66  | 0   |
| 9   | 0   | 18  | 15 | 0   | 6   | 2   | 0   | 10  |
| 0   | 0   | 0   | 32 | 0   | 0   | 0   | 15  | 0   |
| 19  | 3   | 0   | 0  | 213 | 62  | 0   | 0   | 0   |
| 18  | 5   | 0   | 0  | 0   | 7   | 0   | 0   | 0   |
| 0   | 0   | 0   | 0  | 0   | 0   | 0   | 0   | 0   |
| 30  | 2   | 0   | 0  | 0   | 3   | 0   | 0   | 0   |
| 0   | 0   | 23  | 8  | 0   | 0   | 0   | 8   | 27  |
| 0   | 5   | 0   | 20 | 0   | 33  | 4   | 0   | 0   |
| 0   | 0   | 0   | 22 | 0   | 2   | 45  | 23  | 4   |
| 2   | 0   | 88  | 31 | 0   | 0   | 20  | 31  | 13  |
| 0   | 0   | 14  | 19 | 0   | 0   | 10  | 17  | 14  |
| 12  | 5   | 26  | 15 | 16  | 7   | 26  | 11  | 6   |
| 4   | 7   | 0   | 37 | 102 | 0   | 0   | 0   | 0   |
| 7   | 8   | 0   | 58 | 3   | 117 | 5   | 53  | 25  |
| 99  | 296 | 2   | 81 | 290 | 0   | 3   | 5   | 0   |
| 4   | 0   | 0   | 0  | 9   | 59  | 0   | 0   | 0   |
| 0   | 0   | 0   | 0  | 0   | 0   | 0   | 0   | 0   |
| 8   | 14  | 25  | 3  | 52  | 25  | 3   | 7   | 25  |



|     |     |     |     |      |     |     |     |     |
|-----|-----|-----|-----|------|-----|-----|-----|-----|
| 0   | 0   | 0   | 21  | 0    | 0   | 3   | 74  | 26  |
| 0   | 0   | 2   | 45  | 0    | 4   | 121 | 4   | 10  |
| 2   | 25  | 0   | 22  | 21   | 25  | 6   | 39  | 14  |
| 14  | 4   | 11  | 22  | 16   | 34  | 28  | 33  | 11  |
| 0   | 0   | 0   | 23  | 0    | 0   | 11  | 18  | 29  |
| 12  | 3   | 57  | 0   | 2    | 9   | 0   | 0   | 0   |
| 0   | 0   | 0   | 3   | 0    | 0   | 2   | 6   | 22  |
| 0   | 0   | 0   | 0   | 0    | 0   | 70  | 79  | 213 |
| 0   | 16  | 0   | 440 | 150  | 161 | 789 | 222 | 164 |
| 0   | 0   | 4   | 0   | 0    | 2   | 6   | 0   | 0   |
| 34  | 2   | 0   | 0   | 7    | 7   | 0   | 0   | 0   |
| 0   | 0   | 0   | 9   | 0    | 0   | 0   | 0   | 5   |
| 34  | 0   | 21  | 11  | 47   | 20  | 0   | 12  | 0   |
| 0   | 0   | 0   | 0   | 0    | 0   | 0   | 0   | 37  |
| 41  | 6   | 0   | 0   | 12   | 37  | 0   | 0   | 0   |
| 31  | 0   | 12  | 11  | 0    | 11  | 11  | 9   | 7   |
| 13  | 4   | 15  | 13  | 5    | 15  | 24  | 29  | 21  |
| 0   | 0   | 0   | 0   | 0    | 14  | 0   | 0   | 0   |
| 122 | 0   | 37  | 2   | 0    | 42  | 0   | 8   | 4   |
| 98  | 92  | 179 | 4   | 401  | 158 | 27  | 124 | 18  |
| 0   | 0   | 0   | 0   | 0    | 91  | 0   | 0   | 0   |
| 28  | 2   | 144 | 8   | 0    | 25  | 4   | 7   | 10  |
| 0   | 109 | 0   | 14  | 0    | 0   | 0   | 0   | 7   |
| 0   | 0   | 0   | 0   | 0    | 0   | 0   | 0   | 0   |
| 53  | 2   | 0   | 0   | 13   | 7   | 0   | 0   | 0   |
| 6   | 3   | 192 | 13  | 0    | 16  | 25  | 15  | 2   |
| 0   | 0   | 0   | 0   | 1320 | 127 | 0   | 0   | 0   |
| 6   | 0   | 15  | 18  | 5    | 16  | 38  | 33  | 8   |
| 0   | 0   | 0   | 12  | 2    | 0   | 0   | 0   | 14  |
| 0   | 0   | 0   | 3   | 0    | 0   | 3   | 0   | 10  |
| 91  | 7   | 0   | 4   | 0    | 0   | 0   | 0   | 0   |
| 0   | 0   | 0   | 19  | 0    | 0   | 14  | 9   | 0   |
| 0   | 0   | 0   | 0   | 0    | 0   | 0   | 15  | 8   |
| 0   | 0   | 0   | 0   | 0    | 4   | 0   | 0   | 0   |
| 0   | 0   | 0   | 0   | 0    | 7   | 0   | 2   | 0   |
| 0   | 0   | 11  | 12  | 0    | 0   | 0   | 5   | 6   |
| 0   | 0   | 0   | 320 | 0    | 0   | 593 | 37  | 203 |
| 0   | 0   | 0   | 0   | 0    | 0   | 0   | 0   | 2   |
| 0   | 0   | 0   | 31  | 0    | 0   | 0   | 3   | 21  |
| 3   | 0   | 0   | 5   | 0    | 0   | 0   | 0   | 0   |
| 88  | 0   | 0   | 0   | 0    | 10  | 0   | 0   | 0   |
| 0   | 0   | 0   | 90  | 0    | 0   | 0   | 2   | 0   |
| 0   | 515 | 0   | 0   | 2    | 0   | 0   | 0   | 0   |
| 10  | 11  | 3   | 5   | 88   | 56  | 0   | 12  | 4   |
| 0   | 0   | 63  | 62  | 0    | 6   | 51  | 13  | 10  |
| 0   | 0   | 0   | 9   | 0    | 0   | 50  | 2   | 12  |
| 4   | 0   | 15  | 139 | 2    | 0   | 120 | 103 | 240 |
| 0   | 0   | 0   | 5   | 0    | 0   | 0   | 4   | 6   |
| 0   | 0   | 0   | 38  | 0    | 0   | 9   | 14  | 27  |
| 0   | 0   | 35  | 21  | 0    | 0   | 2   | 0   | 2   |

|     |    |     |      |     |     |      |      |     |
|-----|----|-----|------|-----|-----|------|------|-----|
| 55  | 3  | 6   | 0    | 6   | 5   | 25   | 9    | 0   |
| 0   | 25 | 0   | 2    | 31  | 0   | 0    | 0    | 0   |
| 2   | 3  | 4   | 2    | 45  | 6   | 0    | 0    | 0   |
| 0   | 0  | 0   | 0    | 0   | 0   | 0    | 0    | 0   |
| 0   | 12 | 0   | 3    | 0   | 0   | 2    | 5    | 85  |
| 0   | 0  | 0   | 15   | 2   | 7   | 74   | 16   | 30  |
| 0   | 0  | 3   | 0    | 0   | 0   | 0    | 2    | 0   |
| 0   | 0  | 0   | 0    | 0   | 0   | 0    | 0    | 0   |
| 0   | 0  | 0   | 0    | 0   | 0   | 0    | 0    | 2   |
| 127 | 7  | 926 | 0    | 187 | 103 | 3    | 6    | 0   |
| 10  | 0  | 0   | 0    | 28  | 17  | 0    | 3    | 0   |
| 14  | 0  | 0   | 13   | 0   | 16  | 6    | 2    | 10  |
| 0   | 0  | 0   | 2    | 0   | 562 | 0    | 3    | 0   |
| 6   | 5  | 0   | 3    | 20  | 32  | 0    | 7    | 0   |
| 10  | 4  | 0   | 0    | 0   | 20  | 3    | 0    | 0   |
| 0   | 0  | 0   | 224  | 0   | 0   | 135  | 274  | 0   |
| 0   | 0  | 0   | 0    | 0   | 0   | 0    | 0    | 54  |
| 0   | 0  | 0   | 0    | 0   | 0   | 0    | 0    | 0   |
| 13  | 2  | 99  | 2023 | 19  | 19  | 1958 | 1308 | 711 |
| 0   | 0  | 0   | 95   | 0   | 0   | 173  | 180  | 2   |
| 6   | 0  | 0   | 44   | 0   | 27  | 0    | 8    | 0   |
| 12  | 4  | 17  | 0    | 21  | 44  | 0    | 0    | 0   |
| 36  | 22 | 7   | 132  | 0   | 140 | 66   | 92   | 117 |
| 22  | 0  | 0   | 0    | 0   | 0   | 0    | 0    | 0   |
| 0   | 0  | 0   | 41   | 0   | 0   | 0    | 3    | 25  |
| 11  | 2  | 60  | 15   | 4   | 11  | 20   | 11   | 7   |
| 0   | 2  | 0   | 19   | 0   | 0   | 36   | 44   | 87  |
| 0   | 0  | 19  | 295  | 0   | 0   | 726  | 720  | 427 |
| 11  | 12 | 0   | 0    | 0   | 14  | 4    | 2    | 0   |
| 311 | 58 | 556 | 182  | 140 | 70  | 86   | 169  | 72  |
| 0   | 15 | 0   | 0    | 0   | 107 | 0    | 0    | 0   |
| 0   | 0  | 0   | 31   | 0   | 0   | 171  | 154  | 90  |
| 24  | 2  | 4   | 8    | 0   | 455 | 0    | 3    | 0   |
| 0   | 0  | 0   | 104  | 0   | 0   | 9    | 41   | 82  |
| 0   | 4  | 0   | 0    | 0   | 0   | 4    | 0    | 0   |
| 4   | 13 | 0   | 0    | 0   | 15  | 0    | 0    | 0   |
| 0   | 0  | 0   | 0    | 12  | 29  | 16   | 0    | 0   |
| 0   | 0  | 0   | 2    | 0   | 25  | 7    | 0    | 0   |
| 0   | 0  | 0   | 0    | 0   | 0   | 0    | 107  | 2   |
| 134 | 0  | 0   | 108  | 10  | 0   | 46   | 275  | 12  |
| 11  | 9  | 0   | 8    | 13  | 20  | 0    | 0    | 2   |
| 35  | 5  | 74  | 102  | 9   | 59  | 252  | 189  | 101 |
| 0   | 0  | 68  | 0    | 0   | 0   | 0    | 0    | 0   |
| 69  | 0  | 39  | 13   | 75  | 43  | 6    | 29   | 9   |
| 0   | 0  | 4   | 40   | 0   | 0   | 0    | 0    | 49  |
| 0   | 0  | 0   | 71   | 0   | 0   | 0    | 132  | 23  |
| 0   | 0  | 6   | 28   | 0   | 0   | 2    | 0    | 0   |
| 54  | 0  | 0   | 9    | 704 | 0   | 0    | 13   | 0   |
| 24  | 0  | 0   | 2    | 0   | 4   | 0    | 4    | 0   |
| 0   | 0  | 38  | 106  | 0   | 0   | 127  | 42   | 113 |

|      |     |     |      |      |      |     |     |     |
|------|-----|-----|------|------|------|-----|-----|-----|
| 0    | 0   | 0   | 31   | 0    | 0    | 0   | 0   | 7   |
| 0    | 0   | 0   | 0    | 0    | 0    | 0   | 0   | 26  |
| 0    | 0   | 4   | 12   | 3    | 0    | 13  | 8   | 24  |
| 79   | 13  | 13  | 12   | 30   | 16   | 10  | 20  | 5   |
| 4    | 0   | 55  | 169  | 4    | 0    | 418 | 215 | 103 |
| 9    | 0   | 0   | 0    | 136  | 0    | 0   | 0   | 0   |
| 0    | 0   | 0   | 2    | 0    | 0    | 9   | 0   | 0   |
| 162  | 6   | 106 | 40   | 31   | 82   | 28  | 43  | 43  |
| 0    | 0   | 0   | 0    | 25   | 0    | 0   | 0   | 0   |
| 0    | 0   | 0   | 0    | 0    | 0    | 0   | 0   | 0   |
| 4    | 85  | 274 | 0    | 262  | 23   | 0   | 0   | 0   |
| 21   | 23  | 0   | 139  | 0    | 11   | 0   | 107 | 0   |
| 289  | 0   | 0   | 10   | 2    | 2    | 0   | 10  | 5   |
| 0    | 0   | 645 | 0    | 0    | 0    | 0   | 0   | 0   |
| 2    | 0   | 0   | 0    | 0    | 2    | 0   | 0   | 0   |
| 110  | 24  | 885 | 234  | 135  | 217  | 175 | 279 | 117 |
| 0    | 3   | 0   | 7    | 0    | 0    | 0   | 6   | 0   |
| 9    | 0   | 0   | 0    | 0    | 46   | 0   | 3   | 0   |
| 0    | 0   | 0   | 49   | 0    | 0    | 0   | 0   | 0   |
| 0    | 3   | 69  | 13   | 8    | 0    | 3   | 3   | 18  |
| 3    | 2   | 332 | 173  | 5    | 2    | 113 | 203 | 59  |
| 70   | 26  | 0   | 16   | 34   | 144  | 6   | 42  | 4   |
| 10   | 0   | 3   | 20   | 0    | 7    | 6   | 27  | 6   |
| 57   | 28  | 5   | 4    | 64   | 52   | 5   | 10  | 3   |
| 0    | 0   | 0   | 0    | 0    | 0    | 0   | 0   | 0   |
| 0    | 0   | 0   | 19   | 0    | 0    | 28  | 11  | 104 |
| 132  | 0   | 0   | 6    | 17   | 24   | 0   | 0   | 4   |
| 4060 | 643 | 0   | 0    | 6728 | 2048 | 53  | 2   | 0   |
| 45   | 3   | 0   | 0    | 0    | 7    | 0   | 0   | 0   |
| 50   | 12  | 0   | 0    | 59   | 34   | 0   | 0   | 0   |
| 192  | 42  | 0   | 2    | 512  | 143  | 0   | 0   | 0   |
| 10   | 0   | 0   | 0    | 0    | 39   | 0   | 0   | 0   |
| 0    | 0   | 0   | 2    | 0    | 0    | 101 | 12  | 21  |
| 0    | 0   | 0   | 125  | 3    | 0    | 253 | 147 | 290 |
| 2    | 0   | 0   | 0    | 0    | 78   | 0   | 2   | 0   |
| 0    | 0   | 0   | 0    | 0    | 0    | 0   | 0   | 0   |
| 0    | 0   | 0   | 0    | 0    | 0    | 0   | 0   | 0   |
| 0    | 0   | 0   | 0    | 0    | 6    | 0   | 0   | 0   |
| 3    | 3   | 0   | 352  | 0    | 5    | 135 | 68  | 172 |
| 0    | 0   | 0   | 138  | 0    | 0    | 15  | 113 | 167 |
| 0    | 0   | 0   | 1595 | 0    | 0    | 0   | 470 | 0   |
| 0    | 0   | 0   | 16   | 0    | 0    | 0   | 14  | 0   |
| 6    | 19  | 0   | 0    | 0    | 0    | 170 | 0   | 0   |
| 24   | 16  | 3   | 17   | 687  | 38   | 27  | 16  | 0   |
| 0    | 0   | 0   | 0    | 0    | 5    | 0   | 0   | 0   |
| 0    | 0   | 0   | 8    | 0    | 75   | 8   | 2   | 3   |
| 0    | 0   | 0   | 0    | 5    | 68   | 11  | 2   | 7   |
| 523  | 0   | 0   | 0    | 0    | 0    | 0   | 0   | 0   |
| 129  | 14  | 28  | 25   | 79   | 86   | 2   | 14  | 4   |
| 0    | 0   | 0   | 167  | 0    | 0    | 376 | 17  | 44  |

|             |             |             |             |              |             |             |             |             |
|-------------|-------------|-------------|-------------|--------------|-------------|-------------|-------------|-------------|
| 0           | 0           | 0           | 225         | 0            | 0           | 253         | 67          | 59          |
| 2           | 372         | 0           | 52          | 0            | 0           | 0           | 2           | 15          |
| 58          | 11          | 0           | 7           | 20           | 33          | 0           | 5           | 0           |
| 0           | 0           | 0           | 0           | 0            | 45          | 0           | 0           | 0           |
| 60          | 5           | 0           | 0           | 13           | 0           | 0           | 0           | 0           |
| 6           | 7           | 92          | 217         | 29           | 14          | 82          | 81          | 47          |
| 16          | 4           | 2           | 149         | 16           | 31          | 587         | 230         | 64          |
| 113         | 7           | 273         | 43          | 80           | 51          | 7           | 58          | 14          |
| 0           | 0           | 0           | 0           | 0            | 62          | 0           | 13          | 0           |
| 44          | 49          | 238         | 2           | 62           | 70          | 0           | 2           | 0           |
| 172         | 0           | 0           | 11          | 659          | 3           | 2           | 16          | 0           |
| 51          | 2           | 6           | 12          | 3            | 48          | 11          | 5           | 21          |
| 0           | 0           | 448         | 439         | 2            | 0           | 1287        | 386         | 309         |
| 41          | 2           | 42          | 64          | 6            | 24          | 0           | 55          | 61          |
| 0           | 4           | 0           | 0           | 390          | 30          | 0           | 0           | 0           |
| 0           | 0           | 86          | 0           | 0            | 8           | 0           | 0           | 0           |
| 0           | 0           | 0           | 9           | 0            | 0           | 64          | 0           | 126         |
| 0           | 0           | 0           | 0           | 0            | 0           | 0           | 283         | 249         |
| 4           | 6           | 0           | 59          | 2            | 62          | 13          | 85          | 28          |
| 0           | 0           | 32          | 4           | 0            | 0           | 0           | 0           | 0           |
| 0           | 73          | 0           | 38          | 154          | 67          | 19          | 0           | 0           |
| 0           | 2           | 0           | 12          | 0            | 13          | 18          | 8           | 0           |
| 26          | 0           | 0           | 56          | 0            | 0           | 0           | 0           | 0           |
| 9           | 0           | 0           | 4           | 0            | 0           | 8           | 2           | 5           |
| 0           | 0           | 0           | 11          | 0            | 0           | 0           | 0           | 0           |
| 106         | 29          | 385         | 46          | 350          | 73          | 17          | 185         | 59          |
| 0           | 0           | 5           | 0           | 0            | 5           | 0           | 0           | 0           |
| 0           | 0           | 0           | 0           | 0            | 0           | 106         | 0           | 10          |
| 0           | 0           | 0           | 0           | 0            | 176         | 0           | 0           | 0           |
| 0           | 0           | 105         | 42          | 0            | 3           | 43          | 46          | 10          |
| 21          | 0           | 41          | 77          | 5            | 20          | 0           | 20          | 2           |
| 0           | 0           | 0           | 3           | 0            | 0           | 0           | 0           | 0           |
| 16          | 19          | 0           | 3           | 62           | 20          | 5           | 2           | 0           |
| 0           | 0           | 0           | 0           | 0            | 0           | 0           | 0           | 3           |
| <b>7694</b> | <b>1735</b> | <b>6097</b> | <b>8726</b> | <b>11926</b> | <b>5957</b> | <b>8419</b> | <b>7261</b> | <b>4430</b> |



|     |     |     |     |     |     |    |     |      |
|-----|-----|-----|-----|-----|-----|----|-----|------|
| 0   | 0   | 52  | 0   | 0   | 103 | 30 | 0   | 50   |
| 0   | 0   | 3   | 0   | 0   | 29  | 16 | 0   | 41   |
| 0   | 58  | 119 | 29  | 16  | 138 | 84 | 25  | 94   |
| 50  | 156 | 0   | 55  | 30  | 19  | 12 | 52  | 26   |
| 4   | 5   | 0   | 0   | 48  | 0   | 4  | 6   | 4    |
| 27  | 52  | 188 | 63  | 191 | 134 | 47 | 2   | 35   |
| 3   | 82  | 31  | 86  | 26  | 22  | 65 | 16  | 13   |
| 2   | 21  | 0   | 23  | 13  | 0   | 0  | 120 | 0    |
| 4   | 8   | 20  | 52  | 0   | 3   | 0  | 4   | 30   |
| 28  | 0   | 0   | 78  | 0   | 0   | 0  | 0   | 0    |
| 0   | 2   | 0   | 0   | 0   | 36  | 15 | 0   | 12   |
| 180 | 0   | 0   | 0   | 0   | 0   | 0  | 0   | 0    |
| 0   | 0   | 0   | 0   | 0   | 5   | 0  | 0   | 6    |
| 17  | 11  | 9   | 44  | 14  | 9   | 29 | 4   | 5    |
| 2   | 10  | 0   | 3   | 0   | 3   | 0  | 5   | 2    |
| 0   | 0   | 0   | 0   | 18  | 0   | 0  | 45  | 0    |
| 0   | 0   | 36  | 4   | 0   | 24  | 53 | 0   | 101  |
| 0   | 5   | 0   | 9   | 8   | 0   | 0  | 20  | 0    |
| 8   | 0   | 0   | 14  | 0   | 0   | 16 | 95  | 0    |
| 0   | 10  | 3   | 8   | 0   | 9   | 16 | 0   | 10   |
| 2   | 24  | 60  | 29  | 11  | 23  | 23 | 0   | 17   |
| 17  | 66  | 0   | 11  | 102 | 5   | 0  | 42  | 0    |
| 44  | 57  | 0   | 65  | 11  | 0   | 4  | 16  | 2    |
| 3   | 0   | 10  | 0   | 0   | 44  | 25 | 0   | 7    |
| 11  | 0   | 0   | 0   | 30  | 3   | 7  | 4   | 0    |
| 3   | 0   | 13  | 15  | 4   | 0   | 19 | 0   | 0    |
| 0   | 0   | 0   | 0   | 59  | 0   | 64 | 0   | 0    |
| 0   | 0   | 13  | 0   | 27  | 15  | 4  | 0   | 24   |
| 4   | 8   | 0   | 29  | 3   | 0   | 6  | 0   | 4    |
| 43  | 2   | 10  | 11  | 40  | 16  | 3  | 121 | 5    |
| 6   | 9   | 8   | 10  | 0   | 4   | 3  | 7   | 22   |
| 0   | 0   | 46  | 0   | 0   | 25  | 44 | 0   | 0    |
| 5   | 8   | 13  | 6   | 5   | 26  | 0  | 20  | 7    |
| 0   | 0   | 15  | 0   | 0   | 14  | 0  | 0   | 0    |
| 15  | 130 | 0   | 31  | 0   | 0   | 0  | 2   | 0    |
| 16  | 37  | 0   | 18  | 0   | 0   | 0  | 9   | 0    |
| 4   | 0   | 0   | 6   | 0   | 0   | 0  | 8   | 0    |
| 9   | 0   | 0   | 0   | 0   | 0   | 3  | 0   | 0    |
| 0   | 6   | 0   | 0   | 0   | 9   | 0  | 0   | 0    |
| 30  | 35  | 0   | 7   | 0   | 8   | 3  | 0   | 0    |
| 2   | 2   | 23  | 18  | 12  | 14  | 66 | 0   | 7    |
| 2   | 0   | 43  | 0   | 63  | 6   | 67 | 2   | 41   |
| 2   | 9   | 15  | 12  | 15  | 20  | 16 | 0   | 13   |
| 0   | 22  | 2   | 13  | 33  | 17  | 18 | 34  | 17   |
| 26  | 11  | 0   | 10  | 0   | 10  | 2  | 0   | 2    |
| 12  | 29  | 20  | 414 | 5   | 15  | 7  | 50  | 13   |
| 0   | 165 | 0   | 37  | 0   | 2   | 0  | 222 | 1344 |
| 5   | 6   | 0   | 0   | 0   | 0   | 0  | 3   | 0    |
| 3   | 0   | 0   | 0   | 0   | 0   | 0  | 18  | 0    |
| 7   | 82  | 6   | 26  | 2   | 30  | 5  | 14  | 4    |

|     |     |     |     |     |     |     |     |     |
|-----|-----|-----|-----|-----|-----|-----|-----|-----|
| 0   | 0   | 8   | 0   | 0   | 6   | 18  | 0   | 4   |
| 0   | 9   | 37  | 10  | 21  | 11  | 74  | 0   | 28  |
| 0   | 0   | 37  | 28  | 9   | 49  | 0   | 0   | 28  |
| 36  | 67  | 13  | 66  | 0   | 4   | 19  | 76  | 9   |
| 0   | 0   | 41  | 0   | 0   | 8   | 0   | 0   | 2   |
| 0   | 47  | 0   | 54  | 11  | 0   | 0   | 9   | 0   |
| 0   | 0   | 7   | 0   | 0   | 3   | 12  | 0   | 18  |
| 0   | 0   | 142 | 0   | 0   | 68  | 0   | 0   | 0   |
| 41  | 332 | 359 | 178 | 0   | 108 | 76  | 28  | 355 |
| 0   | 0   | 0   | 2   | 9   | 0   | 0   | 0   | 0   |
| 10  | 2   | 0   | 12  | 8   | 0   | 0   | 6   | 0   |
| 0   | 14  | 2   | 0   | 69  | 0   | 0   | 5   | 0   |
| 11  | 26  | 17  | 15  | 21  | 5   | 0   | 11  | 2   |
| 0   | 0   | 0   | 0   | 0   | 0   | 0   | 0   | 20  |
| 3   | 17  | 0   | 44  | 0   | 0   | 0   | 7   | 0   |
| 43  | 21  | 7   | 8   | 6   | 9   | 10  | 10  | 3   |
| 10  | 6   | 8   | 47  | 92  | 12  | 14  | 27  | 22  |
| 0   | 0   | 0   | 6   | 0   | 2   | 0   | 94  | 0   |
| 0   | 35  | 8   | 4   | 0   | 22  | 2   | 15  | 11  |
| 249 | 217 | 47  | 135 | 267 | 53  | 68  | 771 | 36  |
| 3   | 0   | 0   | 3   | 0   | 0   | 0   | 0   | 4   |
| 31  | 54  | 5   | 29  | 30  | 8   | 6   | 225 | 8   |
| 0   | 0   | 2   | 75  | 0   | 153 | 0   | 0   | 7   |
| 0   | 0   | 0   | 0   | 0   | 0   | 0   | 0   | 0   |
| 3   | 27  | 0   | 5   | 0   | 0   | 0   | 114 | 0   |
| 0   | 11  | 23  | 26  | 4   | 13  | 29  | 139 | 10  |
| 0   | 0   | 0   | 3   | 0   | 0   | 0   | 0   | 0   |
| 8   | 26  | 28  | 9   | 12  | 11  | 42  | 11  | 32  |
| 27  | 13  | 0   | 6   | 4   | 2   | 0   | 68  | 0   |
| 0   | 0   | 0   | 0   | 16  | 3   | 0   | 0   | 14  |
| 153 | 50  | 0   | 0   | 0   | 5   | 2   | 0   | 2   |
| 0   | 0   | 9   | 0   | 0   | 31  | 12  | 0   | 2   |
| 0   | 0   | 0   | 2   | 16  | 0   | 0   | 0   | 0   |
| 0   | 0   | 0   | 0   | 0   | 2   | 0   | 0   | 0   |
| 14  | 0   | 0   | 5   | 0   | 0   | 0   | 0   | 0   |
| 0   | 3   | 8   | 0   | 15  | 4   | 13  | 0   | 5   |
| 0   | 0   | 74  | 0   | 0   | 531 | 2   | 0   | 153 |
| 0   | 0   | 0   | 0   | 2   | 2   | 0   | 0   | 0   |
| 0   | 0   | 2   | 0   | 0   | 12  | 4   | 0   | 62  |
| 21  | 0   | 0   | 0   | 0   | 0   | 7   | 0   | 0   |
| 54  | 0   | 0   | 0   | 0   | 0   | 0   | 0   | 0   |
| 0   | 0   | 0   | 0   | 0   | 66  | 0   | 0   | 0   |
| 0   | 0   | 0   | 18  | 0   | 0   | 0   | 0   | 0   |
| 5   | 45  | 0   | 22  | 4   | 16  | 7   | 18  | 3   |
| 0   | 30  | 21  | 12  | 2   | 12  | 38  | 2   | 33  |
| 0   | 0   | 10  | 9   | 0   | 0   | 4   | 0   | 29  |
| 0   | 0   | 180 | 0   | 176 | 93  | 129 | 0   | 140 |
| 0   | 0   | 7   | 0   | 0   | 8   | 3   | 0   | 35  |
| 0   | 0   | 32  | 0   | 0   | 2   | 3   | 0   | 0   |
| 2   | 0   | 0   | 0   | 31  | 0   | 13  | 0   | 2   |

|     |      |     |      |     |     |     |     |     |
|-----|------|-----|------|-----|-----|-----|-----|-----|
| 20  | 10   | 9   | 2    | 0   | 3   | 20  | 2   | 14  |
| 102 | 153  | 0   | 67   | 0   | 0   | 0   | 3   | 0   |
| 34  | 48   | 0   | 8    | 0   | 5   | 0   | 0   | 0   |
| 368 | 0    | 0   | 69   | 0   | 0   | 0   | 0   | 0   |
| 16  | 80   | 130 | 13   | 0   | 6   | 25  | 0   | 61  |
| 0   | 18   | 33  | 16   | 64  | 22  | 52  | 0   | 39  |
| 0   | 0    | 0   | 0    | 0   | 0   | 2   | 0   | 0   |
| 0   | 28   | 0   | 69   | 0   | 0   | 0   | 0   | 0   |
| 0   | 0    | 0   | 6    | 0   | 0   | 12  | 0   | 11  |
| 46  | 100  | 2   | 37   | 216 | 2   | 5   | 202 | 0   |
| 9   | 7    | 0   | 53   | 2   | 0   | 0   | 150 | 22  |
| 18  | 0    | 0   | 0    | 3   | 2   | 2   | 5   | 16  |
| 44  | 0    | 0   | 21   | 0   | 0   | 0   | 0   | 0   |
| 9   | 27   | 0   | 24   | 0   | 3   | 7   | 3   | 4   |
| 0   | 5    | 5   | 6    | 0   | 0   | 0   | 16  | 0   |
| 0   | 0    | 48  | 0    | 0   | 371 | 0   | 0   | 0   |
| 0   | 0    | 21  | 0    | 0   | 70  | 0   | 0   | 0   |
| 0   | 0    | 0   | 3    | 0   | 0   | 0   | 0   | 0   |
| 31  | 3    | 398 | 28   | 40  | 974 | 879 | 3   | 614 |
| 0   | 0    | 95  | 0    | 0   | 253 | 5   | 0   | 107 |
| 10  | 0    | 4   | 0    | 3   | 11  | 2   | 55  | 5   |
| 24  | 17   | 0   | 7    | 2   | 0   | 0   | 3   | 0   |
| 39  | 23   | 101 | 536  | 238 | 206 | 22  | 506 | 82  |
| 0   | 24   | 0   | 2    | 0   | 0   | 0   | 182 | 0   |
| 0   | 0    | 6   | 0    | 0   | 20  | 3   | 0   | 11  |
| 27  | 27   | 38  | 28   | 43  | 21  | 12  | 36  | 12  |
| 0   | 0    | 9   | 9    | 0   | 3   | 0   | 0   | 10  |
| 0   | 8    | 420 | 26   | 28  | 364 | 700 | 0   | 148 |
| 15  | 1026 | 0   | 3    | 81  | 3   | 0   | 5   | 0   |
| 165 | 144  | 130 | 82   | 32  | 189 | 116 | 68  | 154 |
| 54  | 151  | 0   | 21   | 0   | 0   | 0   | 10  | 0   |
| 0   | 0    | 35  | 0    | 0   | 48  | 20  | 2   | 31  |
| 116 | 14   | 0   | 25   | 0   | 3   | 0   | 0   | 3   |
| 0   | 0    | 69  | 0    | 0   | 70  | 0   | 0   | 222 |
| 4   | 0    | 0   | 35   | 0   | 5   | 2   | 0   | 5   |
| 11  | 455  | 0   | 13   | 35  | 2   | 0   | 23  | 0   |
| 8   | 0    | 0   | 10   | 0   | 0   | 0   | 165 | 0   |
| 0   | 0    | 0   | 1607 | 0   | 0   | 0   | 0   | 0   |
| 0   | 0    | 96  | 0    | 0   | 0   | 27  | 0   | 11  |
| 0   | 13   | 19  | 22   | 0   | 53  | 70  | 8   | 126 |
| 60  | 21   | 0   | 130  | 0   | 2   | 20  | 25  | 5   |
| 27  | 163  | 218 | 192  | 538 | 198 | 403 | 260 | 145 |
| 0   | 150  | 0   | 0    | 0   | 9   | 0   | 0   | 0   |
| 18  | 0    | 15  | 0    | 29  | 2   | 47  | 33  | 13  |
| 0   | 8    | 0   | 0    | 540 | 12  | 14  | 0   | 99  |
| 0   | 0    | 142 | 0    | 0   | 2   | 53  | 0   | 40  |
| 0   | 0    | 0   | 0    | 0   | 3   | 22  | 0   | 11  |
| 9   | 53   | 0   | 5    | 0   | 7   | 2   | 0   | 4   |
| 2   | 17   | 2   | 14   | 0   | 0   | 0   | 0   | 2   |
| 0   | 0    | 142 | 0    | 0   | 189 | 152 | 0   | 65  |



|     |     |     |     |     |     |     |     |     |
|-----|-----|-----|-----|-----|-----|-----|-----|-----|
| 0   | 0   | 2   | 0   | 0   | 58  | 38  | 0   | 0   |
| 0   | 0   | 0   | 0   | 0   | 0   | 0   | 0   | 0   |
| 0   | 0   | 6   | 0   | 4   | 4   | 18  | 0   | 23  |
| 0   | 3   | 0   | 31  | 2   | 118 | 8   | 27  | 3   |
| 0   | 4   | 372 | 39  | 4   | 89  | 295 | 13  | 186 |
| 0   | 36  | 0   | 12  | 0   | 0   | 0   | 0   | 0   |
| 2   | 0   | 0   | 0   | 0   | 9   | 2   | 0   | 14  |
| 36  | 108 | 63  | 63  | 237 | 39  | 82  | 141 | 21  |
| 0   | 0   | 0   | 17  | 0   | 0   | 0   | 0   | 0   |
| 0   | 0   | 0   | 0   | 0   | 0   | 0   | 0   | 0   |
| 0   | 569 | 0   | 60  | 0   | 0   | 0   | 78  | 0   |
| 4   | 0   | 0   | 36  | 0   | 118 | 3   | 0   | 0   |
| 19  | 0   | 0   | 0   | 0   | 141 | 3   | 10  | 0   |
| 36  | 0   | 0   | 0   | 0   | 3   | 0   | 27  | 0   |
| 0   | 10  | 0   | 4   | 4   | 3   | 0   | 8   | 0   |
| 125 | 665 | 359 | 373 | 828 | 230 | 774 | 133 | 349 |
| 0   | 0   | 8   | 0   | 0   | 12  | 0   | 0   | 0   |
| 3   | 0   | 0   | 0   | 0   | 0   | 0   | 0   | 3   |
| 0   | 0   | 0   | 300 | 0   | 0   | 0   | 0   | 0   |
| 5   | 3   | 7   | 24  | 0   | 10  | 4   | 52  | 11  |
| 6   | 9   | 160 | 0   | 60  | 201 | 89  | 7   | 58  |
| 134 | 254 | 26  | 204 | 21  | 42  | 0   | 226 | 11  |
| 22  | 0   | 12  | 14  | 17  | 13  | 66  | 15  | 13  |
| 24  | 64  | 7   | 25  | 0   | 29  | 12  | 10  | 20  |
| 0   | 0   | 0   | 0   | 4   | 0   | 0   | 0   | 0   |
| 0   | 0   | 6   | 0   | 0   | 35  | 22  | 0   | 18  |
| 0   | 0   | 0   | 3   | 59  | 2   | 0   | 6   | 0   |
| 6   | 24  | 772 | 43  | 0   | 7   | 237 | 105 | 860 |
| 16  | 18  | 0   | 2   | 0   | 4   | 0   | 2   | 0   |
| 53  | 439 | 0   | 110 | 3   | 6   | 0   | 226 | 6   |
| 98  | 99  | 0   | 4   | 0   | 0   | 0   | 300 | 7   |
| 11  | 5   | 0   | 4   | 0   | 0   | 0   | 18  | 0   |
| 0   | 0   | 7   | 0   | 4   | 29  | 118 | 0   | 15  |
| 0   | 0   | 105 | 0   | 0   | 403 | 0   | 0   | 13  |
| 11  | 16  | 0   | 8   | 0   | 0   | 0   | 2   | 0   |
| 0   | 0   | 0   | 0   | 0   | 0   | 0   | 0   | 0   |
| 0   | 0   | 0   | 0   | 13  | 0   | 0   | 8   | 0   |
| 0   | 2   | 0   | 2   | 0   | 0   | 0   | 10  | 2   |
| 57  | 0   | 214 | 2   | 0   | 299 | 28  | 0   | 125 |
| 0   | 0   | 49  | 0   | 0   | 145 | 53  | 0   | 79  |
| 0   | 0   | 455 | 0   | 0   | 586 | 57  | 0   | 0   |
| 0   | 0   | 28  | 2   | 15  | 0   | 31  | 2   | 0   |
| 0   | 0   | 0   | 0   | 0   | 0   | 0   | 0   | 0   |
| 46  | 22  | 10  | 33  | 0   | 35  | 6   | 12  | 22  |
| 210 | 0   | 0   | 0   | 0   | 0   | 0   | 0   | 0   |
| 80  | 0   | 3   | 0   | 11  | 12  | 0   | 0   | 0   |
| 68  | 22  | 0   | 39  | 128 | 0   | 83  | 142 | 69  |
| 0   | 0   | 111 | 8   | 0   | 0   | 38  | 13  | 0   |
| 59  | 84  | 15  | 86  | 16  | 15  | 56  | 432 | 0   |
| 0   | 0   | 57  | 0   | 51  | 51  | 2   | 0   | 36  |

|             |             |             |             |             |             |             |             |             |
|-------------|-------------|-------------|-------------|-------------|-------------|-------------|-------------|-------------|
| 0           | 0           | 136         | 0           | 49          | 99          | 98          | 0           | 116         |
| 0           | 0           | 11          | 326         | 0           | 643         | 0           | 0           | 13          |
| 7           | 0           | 0           | 37          | 35          | 3           | 0           | 21          | 0           |
| 0           | 135         | 0           | 434         | 0           | 32          | 0           | 0           | 0           |
| 0           | 6           | 0           | 46          | 0           | 0           | 0           | 4           | 0           |
| 39          | 13          | 126         | 26          | 0           | 80          | 137         | 36          | 125         |
| 38          | 46          | 362         | 46          | 6           | 88          | 220         | 0           | 103         |
| 3           | 38          | 41          | 45          | 22          | 62          | 31          | 8           | 29          |
| 38          | 19          | 17          | 39          | 0           | 0           | 17          | 177         | 8           |
| 56          | 27          | 0           | 45          | 4           | 3           | 0           | 22          | 0           |
| 35          | 26          | 10          | 14          | 2           | 16          | 22          | 50          | 0           |
| 17          | 5           | 0           | 18          | 428         | 6           | 3           | 73          | 3           |
| 0           | 0           | 238         | 0           | 4           | 435         | 828         | 0           | 273         |
| 37          | 5           | 50          | 21          | 144         | 56          | 76          | 23          | 60          |
| 0           | 95          | 0           | 0           | 0           | 5           | 0           | 0           | 0           |
| 0           | 17          | 0           | 3           | 0           | 0           | 0           | 100         | 0           |
| 0           | 0           | 27          | 0           | 243         | 8           | 0           | 0           | 129         |
| 0           | 0           | 141         | 0           | 0           | 393         | 0           | 0           | 0           |
| 10          | 17          | 50          | 411         | 12          | 12          | 13          | 20          | 8           |
| 0           | 0           | 3           | 0           | 368         | 71          | 0           | 0           | 9           |
| 33          | 56          | 0           | 66          | 0           | 15          | 7           | 0           | 0           |
| 9           | 31          | 39          | 0           | 30          | 4           | 0           | 105         | 0           |
| 221         | 0           | 0           | 0           | 0           | 2           | 0           | 0           | 0           |
| 2           | 0           | 0           | 0           | 42          | 0           | 12          | 0           | 0           |
| 3           | 0           | 2           | 0           | 0           | 20          | 3           | 0           | 8           |
| 134         | 146         | 12          | 40          | 20          | 19          | 49          | 33          | 42          |
| 10          | 20          | 0           | 0           | 110         | 0           | 0           | 2           | 0           |
| 0           | 0           | 0           | 0           | 0           | 0           | 2           | 0           | 111         |
| 0           | 0           | 0           | 3           | 0           | 0           | 0           | 0           | 0           |
| 0           | 2           | 41          | 3           | 18          | 30          | 99          | 2           | 25          |
| 6           | 19          | 2           | 7           | 0           | 2           | 16          | 365         | 8           |
| 0           | 0           | 2           | 0           | 2           | 0           | 0           | 0           | 0           |
| 9           | 32          | 3           | 11          | 3           | 5           | 0           | 8           | 2           |
| 0           | 0           | 0           | 0           | 0           | 0           | 0           | 0           | 0           |
| <b>2968</b> | <b>5793</b> | <b>6345</b> | <b>6301</b> | <b>4917</b> | <b>7982</b> | <b>6434</b> | <b>4834</b> | <b>5114</b> |

| 192_are_4 | 193_wt_8 | 229_wt_8 | 192_are_8 | 223_wt_4 | 194_are_1 | 195_wt_12 | 234_are_1 | 233_are_1 |
|-----------|----------|----------|-----------|----------|-----------|-----------|-----------|-----------|
| 16        | 0        | 0        | 1464      | 0        | 2         | 0         | 1919      | 1346      |
| 243       | 5        | 8        | 90        | 66       | 0         | 5         | 51        | 77        |
| 0         | 11       | 5        | 0         | 2        | 0         | 0         | 0         | 0         |
| 0         | 6        | 0        | 0         | 0        | 0         | 0         | 0         | 0         |
| 12        | 34       | 0        | 0         | 2        | 0         | 153       | 0         | 0         |
| 0         | 0        | 0        | 0         | 0        | 0         | 2         | 0         | 0         |
| 151       | 8        | 6        | 14        | 31       | 7         | 45        | 46        | 5         |
| 12        | 0        | 0        | 148       | 4        | 0         | 0         | 2         | 0         |
| 0         | 0        | 0        | 21        | 0        | 0         | 0         | 184       | 247       |
| 0         | 0        | 0        | 32        | 0        | 0         | 0         | 157       | 107       |
| 0         | 0        | 0        | 0         | 0        | 0         | 0         | 0         | 0         |
| 84        | 0        | 22       | 2         | 19       | 0         | 66        | 4         | 0         |
| 0         | 0        | 0        | 0         | 0        | 0         | 0         | 0         | 0         |
| 31        | 53       | 0        | 0         | 125      | 0         | 74        | 0         | 0         |
| 2         | 15       | 5        | 0         | 156      | 0         | 0         | 0         | 0         |
| 59        | 4        | 0        | 118       | 27       | 277       | 3         | 236       | 117       |
| 0         | 0        | 0        | 0         | 0        | 0         | 81        | 10        | 0         |
| 2         | 0        | 4        | 0         | 18       | 0         | 60        | 0         | 0         |
| 7         | 13       | 0        | 0         | 14       | 0         | 61        | 0         | 0         |
| 0         | 0        | 3        | 0         | 0        | 0         | 0         | 125       | 11        |
| 16        | 0        | 0        | 2         | 8        | 0         | 34        | 6         | 67        |
| 60        | 12       | 25       | 6         | 38       | 0         | 37        | 122       | 85        |
| 69        | 38       | 2        | 5         | 13       | 0         | 12        | 25        | 58        |
| 92        | 0        | 0        | 247       | 196      | 0         | 0         | 13        | 116       |
| 0         | 2        | 0        | 0         | 0        | 0         | 0         | 0         | 285       |
| 7         | 0        | 0        | 64        | 5        | 0         | 0         | 21        | 9         |
| 135       | 162      | 5        | 18        | 25       | 29        | 31        | 12        | 36        |
| 54        | 28       | 12       | 8         | 25       | 219       | 32        | 43        | 89        |
| 65        | 56       | 47       | 33        | 198      | 107       | 154       | 145       | 111       |
| 68        | 150      | 32       | 7         | 64       | 0         | 17        | 4         | 0         |
| 0         | 0        | 6        | 0         | 44       | 0         | 0         | 0         | 0         |
| 12        | 24       | 7        | 0         | 10       | 38        | 20        | 0         | 0         |
| 77        | 254      | 0        | 0         | 0        | 86        | 19        | 4         | 0         |
| 4         | 106      | 7        | 0         | 33       | 39        | 34        | 0         | 0         |
| 92        | 75       | 127      | 49        | 60       | 0         | 351       | 392       | 330       |
| 13        | 17       | 8        | 25        | 22       | 7         | 3         | 63        | 55        |
| 9         | 9        | 0        | 7         | 17       | 0         | 48        | 261       | 113       |
| 2         | 0        | 3        | 0         | 0        | 0         | 21        | 2         | 6         |
| 45        | 0        | 0        | 6         | 0        | 0         | 0         | 0         | 6         |
| 0         | 0        | 0        | 9         | 28       | 0         | 0         | 40        | 44        |
| 0         | 0        | 0        | 0         | 0        | 0         | 0         | 0         | 0         |
| 30        | 0        | 0        | 6         | 4        | 0         | 0         | 3         | 0         |
| 5         | 3        | 0        | 5         | 3        | 0         | 19        | 0         | 0         |
| 31        | 35       | 29       | 8         | 11       | 33        | 24        | 19        | 50        |
| 0         | 72       | 0        | 21        | 0        | 0         | 94        | 14        | 0         |
| 67        | 15       | 19       | 39        | 26       | 6         | 48        | 20        | 11        |
| 0         | 0        | 0        | 12        | 14       | 273       | 0         | 0         | 0         |
| 38        | 187      | 2        | 3         | 36       | 93        | 37        | 0         | 0         |
| 0         | 0        | 0        | 0         | 21       | 232       | 0         | 0         | 0         |

|     |     |     |     |     |      |     |     |     |
|-----|-----|-----|-----|-----|------|-----|-----|-----|
| 4   | 0   | 0   | 119 | 16  | 0    | 0   | 194 | 92  |
| 101 | 0   | 0   | 0   | 44  | 0    | 0   | 10  | 29  |
| 29  | 70  | 16  | 62  | 18  | 0    | 8   | 133 | 95  |
| 37  | 288 | 29  | 8   | 34  | 45   | 51  | 10  | 28  |
| 84  | 5   | 0   | 2   | 0   | 42   | 15  | 6   | 6   |
| 257 | 70  | 9   | 87  | 136 | 0    | 14  | 24  | 181 |
| 19  | 58  | 31  | 11  | 20  | 7    | 60  | 29  | 2   |
| 0   | 16  | 0   | 0   | 39  | 0    | 51  | 0   | 0   |
| 0   | 0   | 0   | 24  | 0   | 0    | 47  | 38  | 13  |
| 14  | 0   | 0   | 10  | 21  | 0    | 0   | 0   | 0   |
| 0   | 4   | 6   | 0   | 69  | 0    | 0   | 2   | 0   |
| 0   | 0   | 0   | 0   | 0   | 0    | 0   | 0   | 0   |
| 0   | 0   | 0   | 0   | 0   | 0    | 0   | 0   | 178 |
| 0   | 22  | 19  | 0   | 27  | 280  | 25  | 28  | 6   |
| 2   | 11  | 0   | 0   | 2   | 14   | 4   | 0   | 0   |
| 0   | 0   | 0   | 0   | 0   | 0    | 0   | 0   | 0   |
| 119 | 0   | 0   | 32  | 31  | 1995 | 2   | 93  | 111 |
| 4   | 8   | 0   | 0   | 6   | 4    | 2   | 0   | 0   |
| 0   | 8   | 0   | 0   | 49  | 0    | 0   | 0   | 0   |
| 4   | 8   | 10  | 2   | 13  | 105  | 61  | 2   | 0   |
| 52  | 31  | 24  | 17  | 5   | 0    | 11  | 6   | 21  |
| 17  | 5   | 37  | 0   | 122 | 2    | 46  | 0   | 2   |
| 8   | 38  | 5   | 4   | 15  | 8    | 42  | 0   | 0   |
| 0   | 0   | 0   | 0   | 0   | 0    | 4   | 23  | 0   |
| 0   | 2   | 4   | 5   | 55  | 0    | 0   | 22  | 0   |
| 32  | 0   | 0   | 118 | 25  | 0    | 24  | 0   | 53  |
| 0   | 0   | 0   | 7   | 0   | 1538 | 11  | 0   | 0   |
| 6   | 0   | 0   | 0   | 9   | 161  | 0   | 8   | 32  |
| 5   | 4   | 9   | 0   | 0   | 2    | 29  | 0   | 0   |
| 53  | 88  | 0   | 7   | 6   | 0    | 62  | 12  | 6   |
| 23  | 22  | 3   | 16  | 5   | 100  | 6   | 10  | 11  |
| 85  | 0   | 0   | 87  | 0   | 0    | 0   | 0   | 0   |
| 69  | 13  | 0   | 2   | 31  | 2    | 9   | 2   | 29  |
| 0   | 0   | 0   | 2   | 0   | 0    | 0   | 0   | 0   |
| 0   | 58  | 2   | 3   | 6   | 2    | 10  | 0   | 0   |
| 2   | 27  | 0   | 0   | 14  | 7    | 7   | 0   | 0   |
| 0   | 0   | 0   | 0   | 0   | 0    | 0   | 0   | 0   |
| 8   | 0   | 0   | 0   | 0   | 0    | 22  | 0   | 0   |
| 82  | 15  | 0   | 10  | 0   | 0    | 0   | 14  | 11  |
| 0   | 31  | 0   | 3   | 0   | 5    | 18  | 0   | 0   |
| 52  | 0   | 2   | 4   | 21  | 0    | 15  | 5   | 16  |
| 81  | 4   | 3   | 16  | 11  | 0    | 2   | 21  | 15  |
| 41  | 11  | 21  | 11  | 41  | 0    | 0   | 7   | 12  |
| 0   | 43  | 7   | 8   | 14  | 440  | 6   | 9   | 9   |
| 0   | 42  | 0   | 0   | 0   | 45   | 18  | 2   | 0   |
| 19  | 13  | 37  | 99  | 10  | 0    | 178 | 70  | 31  |
| 23  | 0   | 443 | 50  | 29  | 2    | 118 | 34  | 26  |
| 0   | 0   | 0   | 0   | 2   | 0    | 3   | 4   | 0   |
| 25  | 0   | 4   | 0   | 11  | 0    | 0   | 0   | 0   |
| 32  | 53  | 9   | 10  | 15  | 37   | 14  | 16  | 25  |

|     |     |     |     |     |     |     |     |     |
|-----|-----|-----|-----|-----|-----|-----|-----|-----|
| 0   | 0   | 0   | 84  | 0   | 0   | 0   | 74  | 8   |
| 2   | 10  | 4   | 20  | 14  | 30  | 8   | 26  | 53  |
| 4   | 0   | 31  | 24  | 17  | 0   | 52  | 65  | 3   |
| 0   | 58  | 53  | 6   | 12  | 4   | 123 | 12  | 31  |
| 0   | 0   | 0   | 101 | 0   | 0   | 0   | 35  | 47  |
| 0   | 24  | 9   | 0   | 4   | 0   | 33  | 0   | 0   |
| 0   | 0   | 0   | 6   | 0   | 0   | 0   | 4   | 10  |
| 0   | 0   | 0   | 14  | 0   | 0   | 0   | 196 | 8   |
| 41  | 303 | 203 | 196 | 0   | 5   | 39  | 174 | 95  |
| 18  | 0   | 0   | 10  | 2   | 98  | 5   | 0   | 0   |
| 2   | 0   | 0   | 0   | 0   | 0   | 0   | 2   | 0   |
| 0   | 0   | 2   | 21  | 24  | 0   | 0   | 0   | 9   |
| 24  | 15  | 9   | 0   | 6   | 0   | 8   | 7   | 9   |
| 0   | 0   | 0   | 0   | 0   | 0   | 0   | 39  | 95  |
| 63  | 0   | 3   | 0   | 0   | 37  | 24  | 0   | 0   |
| 48  | 16  | 3   | 3   | 18  | 0   | 66  | 8   | 4   |
| 14  | 38  | 25  | 0   | 29  | 0   | 26  | 20  | 26  |
| 0   | 0   | 0   | 0   | 6   | 0   | 0   | 0   | 0   |
| 27  | 13  | 0   | 0   | 114 | 0   | 26  | 12  | 0   |
| 81  | 188 | 269 | 18  | 256 | 0   | 707 | 62  | 14  |
| 0   | 0   | 0   | 0   | 0   | 9   | 0   | 0   | 0   |
| 40  | 47  | 9   | 0   | 82  | 0   | 30  | 0   | 11  |
| 0   | 223 | 0   | 0   | 2   | 0   | 0   | 34  | 0   |
| 0   | 0   | 0   | 0   | 0   | 90  | 0   | 0   | 0   |
| 0   | 28  | 13  | 0   | 20  | 0   | 22  | 0   | 0   |
| 5   | 14  | 9   | 22  | 6   | 0   | 5   | 25  | 28  |
| 0   | 0   | 0   | 0   | 0   | 0   | 0   | 0   | 0   |
| 39  | 20  | 12  | 6   | 51  | 0   | 14  | 11  | 26  |
| 0   | 19  | 0   | 0   | 0   | 0   | 0   | 2   | 0   |
| 0   | 0   | 0   | 0   | 0   | 0   | 0   | 12  | 32  |
| 80  | 100 | 59  | 0   | 0   | 424 | 0   | 0   | 0   |
| 0   | 0   | 0   | 89  | 0   | 0   | 0   | 0   | 0   |
| 0   | 0   | 2   | 0   | 2   | 0   | 0   | 4   | 0   |
| 0   | 0   | 4   | 0   | 0   | 0   | 0   | 0   | 0   |
| 0   | 0   | 0   | 0   | 0   | 0   | 0   | 0   | 0   |
| 34  | 0   | 2   | 15  | 9   | 0   | 0   | 3   | 7   |
| 0   | 0   | 0   | 193 | 124 | 0   | 0   | 40  | 140 |
| 0   | 0   | 0   | 0   | 0   | 0   | 0   | 0   | 3   |
| 2   | 0   | 0   | 37  | 5   | 0   | 0   | 66  | 71  |
| 0   | 0   | 0   | 0   | 0   | 0   | 0   | 0   | 0   |
| 0   | 0   | 0   | 0   | 0   | 0   | 0   | 0   | 0   |
| 0   | 0   | 0   | 0   | 0   | 0   | 19  | 0   | 0   |
| 0   | 0   | 0   | 0   | 0   | 0   | 0   | 0   | 0   |
| 59  | 25  | 3   | 5   | 3   | 9   | 22  | 13  | 3   |
| 19  | 11  | 0   | 7   | 0   | 0   | 4   | 0   | 7   |
| 17  | 0   | 0   | 0   | 3   | 0   | 4   | 14  | 6   |
| 243 | 2   | 0   | 427 | 187 | 69  | 0   | 124 | 316 |
| 0   | 0   | 0   | 2   | 0   | 0   | 0   | 4   | 0   |
| 8   | 0   | 0   | 18  | 0   | 0   | 0   | 44  | 10  |
| 65  | 5   | 0   | 3   | 4   | 0   | 0   | 4   | 7   |

|      |     |     |     |     |     |      |     |      |
|------|-----|-----|-----|-----|-----|------|-----|------|
| 14   | 26  | 2   | 6   | 5   | 40  | 12   | 11  | 7    |
| 0    | 4   | 5   | 0   | 0   | 0   | 169  | 0   | 0    |
| 43   | 10  | 3   | 0   | 4   | 10  | 0    | 0   | 0    |
| 0    | 0   | 0   | 0   | 0   | 0   | 0    | 0   | 0    |
| 0    | 0   | 0   | 17  | 2   | 0   | 22   | 100 | 82   |
| 5    | 17  | 10  | 2   | 34  | 29  | 4    | 9   | 92   |
| 2    | 0   | 0   | 0   | 0   | 0   | 0    | 5   | 0    |
| 0    | 8   | 17  | 0   | 0   | 0   | 0    | 0   | 0    |
| 24   | 0   | 0   | 0   | 12  | 0   | 0    | 7   | 16   |
| 57   | 41  | 19  | 0   | 65  | 0   | 244  | 2   | 0    |
| 9    | 3   | 0   | 0   | 0   | 19  | 14   | 0   | 0    |
| 21   | 7   | 3   | 5   | 0   | 0   | 12   | 10  | 9    |
| 18   | 0   | 0   | 0   | 0   | 0   | 0    | 0   | 0    |
| 28   | 10  | 5   | 11  | 3   | 41  | 11   | 0   | 0    |
| 5    | 0   | 0   | 0   | 4   | 0   | 13   | 0   | 0    |
| 0    | 0   | 0   | 323 | 0   | 0   | 0    | 0   | 0    |
| 0    | 0   | 0   | 391 | 0   | 0   | 0    | 6   | 0    |
| 0    | 0   | 0   | 0   | 0   | 0   | 3    | 0   | 0    |
| 1288 | 89  | 12  | 710 | 215 | 3   | 36   | 384 | 1346 |
| 1055 | 0   | 0   | 106 | 0   | 0   | 0    | 59  | 25   |
| 36   | 4   | 5   | 64  | 20  | 0   | 12   | 14  | 0    |
| 48   | 14  | 0   | 0   | 27  | 40  | 9    | 0   | 0    |
| 40   | 24  | 77  | 253 | 408 | 7   | 1505 | 227 | 143  |
| 0    | 33  | 5   | 0   | 16  | 0   | 377  | 0   | 9    |
| 0    | 0   | 0   | 16  | 0   | 0   | 0    | 135 | 8    |
| 40   | 42  | 22  | 39  | 18  | 63  | 37   | 25  | 38   |
| 0    | 0   | 0   | 6   | 2   | 939 | 0    | 24  | 82   |
| 279  | 35  | 0   | 29  | 25  | 0   | 3    | 235 | 424  |
| 10   | 0   | 2   | 2   | 181 | 0   | 0    | 0   | 4    |
| 253  | 314 | 10  | 50  | 51  | 0   | 58   | 122 | 104  |
| 0    | 319 | 119 | 79  | 0   | 0   | 13   | 4   | 0    |
| 0    | 0   | 0   | 2   | 0   | 0   | 0    | 264 | 353  |
| 0    | 51  | 2   | 0   | 3   | 0   | 0    | 0   | 0    |
| 0    | 0   | 0   | 2   | 0   | 0   | 0    | 827 | 123  |
| 8    | 0   | 0   | 0   | 0   | 0   | 29   | 4   | 0    |
| 5    | 0   | 0   | 0   | 59  | 0   | 0    | 0   | 0    |
| 0    | 29  | 0   | 0   | 0   | 2   | 5    | 0   | 0    |
| 0    | 0   | 0   | 0   | 0   | 0   | 0    | 0   | 0    |
| 0    | 0   | 0   | 160 | 0   | 0   | 0    | 0   | 241  |
| 135  | 0   | 14  | 49  | 123 | 5   | 58   | 11  | 127  |
| 17   | 27  | 19  | 0   | 6   | 137 | 46   | 0   | 2    |
| 163  | 282 | 161 | 68  | 143 | 0   | 39   | 118 | 239  |
| 0    | 0   | 0   | 0   | 2   | 0   | 0    | 0   | 0    |
| 32   | 0   | 52  | 36  | 146 | 186 | 2    | 6   | 11   |
| 586  | 0   | 0   | 21  | 0   | 0   | 0    | 5   | 28   |
| 14   | 0   | 0   | 139 | 0   | 0   | 0    | 61  | 44   |
| 3    | 0   | 0   | 19  | 0   | 0   | 0    | 0   | 8    |
| 6    | 141 | 3   | 0   | 0   | 62  | 0    | 2   | 0    |
| 48   | 3   | 7   | 0   | 38  | 0   | 8    | 0   | 0    |
| 171  | 0   | 0   | 141 | 66  | 0   | 0    | 209 | 256  |

|      |     |     |      |      |     |     |     |     |
|------|-----|-----|------|------|-----|-----|-----|-----|
| 114  | 0   | 0   | 9    | 0    | 0   | 0   | 4   | 0   |
| 0    | 0   | 0   | 0    | 0    | 0   | 0   | 0   | 120 |
| 3    | 0   | 0   | 30   | 0    | 0   | 0   | 75  | 20  |
| 56   | 6   | 9   | 2    | 25   | 0   | 18  | 0   | 21  |
| 369  | 26  | 3   | 66   | 65   | 0   | 12  | 33  | 351 |
| 0    | 0   | 0   | 0    | 3    | 5   | 55  | 0   | 0   |
| 4    | 0   | 0   | 0    | 0    | 0   | 0   | 0   | 0   |
| 155  | 152 | 78  | 95   | 118  | 0   | 58  | 21  | 76  |
| 0    | 0   | 0   | 0    | 0    | 0   | 0   | 0   | 0   |
| 0    | 0   | 0   | 0    | 0    | 0   | 0   | 0   | 0   |
| 0    | 278 | 3   | 0    | 68   | 0   | 204 | 0   | 0   |
| 101  | 0   | 0   | 2    | 0    | 0   | 0   | 3   | 0   |
| 66   | 243 | 0   | 50   | 0    | 0   | 51  | 3   | 41  |
| 2    | 0   | 8   | 0    | 38   | 0   | 16  | 0   | 0   |
| 0    | 0   | 0   | 0    | 13   | 0   | 8   | 0   | 0   |
| 205  | 597 | 200 | 0    | 285  | 0   | 528 | 100 | 329 |
| 0    | 0   | 0   | 4    | 0    | 0   | 174 | 0   | 0   |
| 0    | 0   | 0   | 2    | 0    | 0   | 36  | 29  | 0   |
| 0    | 24  | 159 | 0    | 92   | 0   | 108 | 0   | 0   |
| 16   | 12  | 5   | 0    | 11   | 0   | 25  | 4   | 10  |
| 586  | 12  | 5   | 198  | 224  | 78  | 8   | 82  | 135 |
| 51   | 21  | 22  | 38   | 127  | 37  | 80  | 18  | 15  |
| 51   | 39  | 0   | 21   | 177  | 188 | 70  | 11  | 51  |
| 7    | 36  | 0   | 5    | 10   | 34  | 16  | 13  | 4   |
| 0    | 0   | 0   | 0    | 0    | 0   | 0   | 0   | 0   |
| 2    | 0   | 0   | 67   | 5    | 0   | 0   | 238 | 39  |
| 14   | 4   | 0   | 2    | 2    | 0   | 10  | 2   | 0   |
| 1519 | 15  | 0   | 32   | 1173 | 0   | 594 | 38  | 0   |
| 0    | 3   | 3   | 0    | 101  | 18  | 0   | 0   | 0   |
| 11   | 874 | 22  | 2    | 7    | 10  | 32  | 2   | 14  |
| 96   | 98  | 8   | 0    | 67   | 0   | 61  | 0   | 0   |
| 0    | 0   | 0   | 0    | 3    | 0   | 65  | 0   | 0   |
| 542  | 0   | 0   | 28   | 0    | 0   | 0   | 30  | 3   |
| 0    | 0   | 0   | 41   | 0    | 0   | 0   | 42  | 288 |
| 0    | 2   | 0   | 0    | 0    | 0   | 8   | 0   | 0   |
| 0    | 0   | 0   | 2    | 0    | 0   | 0   | 0   | 0   |
| 0    | 0   | 0   | 0    | 0    | 0   | 0   | 0   | 49  |
| 27   | 32  | 0   | 0    | 7    | 3   | 2   | 0   | 0   |
| 4    | 2   | 0   | 243  | 0    | 0   | 5   | 343 | 262 |
| 0    | 0   | 0   | 55   | 0    | 0   | 0   | 264 | 87  |
| 162  | 0   | 0   | 1559 | 3    | 2   | 0   | 0   | 0   |
| 382  | 0   | 0   | 16   | 13   | 0   | 4   | 0   | 54  |
| 0    | 0   | 0   | 0    | 4    | 0   | 8   | 0   | 0   |
| 23   | 68  | 4   | 0    | 7    | 270 | 15  | 11  | 0   |
| 0    | 0   | 0   | 0    | 0    | 0   | 0   | 0   | 0   |
| 58   | 0   | 5   | 0    | 460  | 0   | 0   | 67  | 24  |
| 40   | 58  | 56  | 9    | 113  | 0   | 21  | 20  | 12  |
| 229  | 0   | 0   | 3    | 0    | 0   | 67  | 0   | 0   |
| 0    | 67  | 310 | 6    | 316  | 14  | 123 | 16  | 7   |
| 56   | 0   | 0   | 51   | 23   | 0   | 0   | 15  | 146 |

|              |             |             |             |             |             |             |             |             |
|--------------|-------------|-------------|-------------|-------------|-------------|-------------|-------------|-------------|
| 94           | 0           | 0           | 76          | 48          | 0           | 0           | 42          | 217         |
| 0            | 947         | 0           | 0           | 0           | 0           | 0           | 225         | 0           |
| 32           | 26          | 3           | 0           | 16          | 0           | 18          | 0           | 4           |
| 0            | 42          | 10          | 0           | 0           | 0           | 224         | 0           | 0           |
| 0            | 2           | 0           | 0           | 105         | 59          | 375         | 0           | 0           |
| 158          | 57          | 84          | 71          | 61          | 0           | 62          | 20          | 86          |
| 127          | 74          | 33          | 94          | 9           | 0           | 77          | 60          | 74          |
| 10           | 14          | 38          | 12          | 8           | 0           | 6           | 20          | 35          |
| 3            | 28          | 93          | 0           | 5           | 0           | 15          | 7           | 0           |
| 16           | 8           | 5           | 0           | 39          | 20          | 40          | 0           | 3           |
| 43           | 156         | 21          | 6           | 7           | 44          | 33          | 6           | 2           |
| 27           | 4           | 7           | 5           | 131         | 0           | 32          | 4           | 4           |
| 1652         | 0           | 0           | 1059        | 245         | 0           | 0           | 879         | 292         |
| 243          | 45          | 26          | 48          | 255         | 0           | 46          | 34          | 44          |
| 0            | 41          | 0           | 0           | 0           | 0           | 0           | 0           | 0           |
| 22           | 7           | 20          | 0           | 14          | 0           | 0           | 3           | 5           |
| 0            | 0           | 0           | 13          | 0           | 0           | 0           | 23          | 108         |
| 0            | 0           | 0           | 0           | 0           | 0           | 0           | 134         | 0           |
| 8            | 4           | 21          | 86          | 0           | 0           | 78          | 86          | 11          |
| 0            | 0           | 52          | 2           | 3           | 0           | 0           | 5           | 0           |
| 0            | 69          | 0           | 2           | 0           | 0           | 42          | 30          | 0           |
| 21           | 7           | 20          | 0           | 13          | 0           | 0           | 3           | 2           |
| 0            | 0           | 0           | 0           | 2           | 0           | 0           | 0           | 0           |
| 961          | 0           | 0           | 13          | 815         | 0           | 0           | 0           | 0           |
| 39           | 0           | 0           | 9           | 0           | 0           | 0           | 0           | 0           |
| 290          | 61          | 26          | 68          | 135         | 226         | 34          | 25          | 22          |
| 5            | 7           | 0           | 0           | 31          | 0           | 0           | 0           | 0           |
| 3            | 0           | 0           | 15          | 0           | 0           | 0           | 21          | 13          |
| 0            | 0           | 0           | 0           | 0           | 0           | 38          | 0           | 0           |
| 21           | 23          | 8           | 3           | 15          | 0           | 3           | 12          | 51          |
| 40           | 5           | 0           | 197         | 27          | 8           | 75          | 22          | 3           |
| 0            | 0           | 0           | 0           | 0           | 0           | 0           | 0           | 0           |
| 20           | 39          | 0           | 2           | 4           | 355         | 19          | 0           | 0           |
| 0            | 0           | 0           | 0           | 0           | 0           | 0           | 0           | 192         |
| <b>13192</b> | <b>5828</b> | <b>1931</b> | <b>7159</b> | <b>7217</b> | <b>2904</b> | <b>6259</b> | <b>6020</b> | <b>7140</b> |



| 196_wt_4 | 194_are_8 | 357_wt_8 | 201_are_8 | 232_are_8 | 323_wt_12 | 191_wt_8 | 195_wt_8 | 226_wt_12 |
|----------|-----------|----------|-----------|-----------|-----------|----------|----------|-----------|
| 0        | 2119      | 7        | 3193      | 331       | 0         | 0        | 0        | 2         |
| 21       | 57        | 5        | 192       | 65        | 0         | 33       | 6        | 29        |
| 21       | 0         | 2        | 0         | 0         | 2         | 4        | 0        | 6         |
| 22       | 0         | 5        | 0         | 0         | 0         | 93       | 7        | 11        |
| 0        | 0         | 0        | 0         | 0         | 0         | 0        | 10       | 9         |
| 0        | 0         | 0        | 0         | 0         | 0         | 0        | 0        | 0         |
| 23       | 12        | 56       | 3         | 18        | 16        | 5        | 11       | 12        |
| 0        | 0         | 0        | 17        | 61        | 0         | 0        | 0        | 0         |
| 0        | 167       | 0        | 6         | 222       | 0         | 0        | 0        | 0         |
| 0        | 6         | 0        | 0         | 331       | 0         | 0        | 0        | 0         |
| 0        | 0         | 0        | 0         | 0         | 8         | 0        | 0        | 0         |
| 0        | 6         | 149      | 39        | 0         | 0         | 57       | 49       | 37        |
| 0        | 0         | 0        | 0         | 111       | 0         | 0        | 0        | 0         |
| 71       | 0         | 173      | 4         | 0         | 2         | 419      | 143      | 144       |
| 0        | 0         | 4        | 5         | 0         | 5         | 8        | 0        | 5         |
| 0        | 62        | 6        | 121       | 46        | 0         | 19       | 3        | 0         |
| 0        | 0         | 0        | 19        | 0         | 0         | 0        | 0        | 0         |
| 0        | 0         | 0        | 0         | 0         | 312       | 0        | 0        | 16        |
| 0        | 0         | 56       | 0         | 0         | 69        | 17       | 3        | 112       |
| 0        | 0         | 0        | 0         | 0         | 0         | 0        | 0        | 220       |
| 0        | 10        | 0        | 38        | 253       | 0         | 0        | 0        | 0         |
| 30       | 28        | 27       | 69        | 167       | 0         | 45       | 12       | 48        |
| 4        | 4         | 33       | 41        | 55        | 0         | 2        | 0        | 133       |
| 0        | 0         | 43       | 0         | 30        | 177       | 419      | 0        | 0         |
| 0        | 0         | 0        | 10        | 0         | 0         | 0        | 0        | 0         |
| 0        | 8         | 0        | 5         | 8         | 0         | 0        | 0        | 0         |
| 263      | 5         | 62       | 16        | 0         | 158       | 25       | 5        | 30        |
| 69       | 36        | 129      | 127       | 57        | 4         | 24       | 156      | 64        |
| 0        | 112       | 26       | 97        | 112       | 0         | 82       | 317      | 12        |
| 47       | 0         | 64       | 14        | 0         | 72        | 65       | 31       | 80        |
| 269      | 0         | 2        | 0         | 0         | 27        | 2        | 10       | 74        |
| 64       | 0         | 17       | 0         | 0         | 50        | 76       | 12       | 11        |
| 0        | 10        | 7        | 0         | 0         | 112       | 12       | 0        | 7         |
| 0        | 5         | 21       | 0         | 0         | 50        | 24       | 6        | 47        |
| 618      | 195       | 103      | 229       | 334       | 395       | 137      | 140      | 439       |
| 0        | 9         | 7        | 34        | 13        | 7         | 2        | 11       | 7         |
| 0        | 8         | 31       | 25        | 45        | 16        | 6        | 2        | 8         |
| 0        | 0         | 21       | 0         | 2         | 2         | 81       | 13       | 38        |
| 0        | 17        | 0        | 104       | 0         | 0         | 0        | 0        | 0         |
| 0        | 3         | 0        | 11        | 52        | 0         | 0        | 0        | 0         |
| 0        | 0         | 0        | 0         | 0         | 0         | 0        | 0        | 0         |
| 0        | 3         | 0        | 21        | 0         | 0         | 47       | 3        | 0         |
| 0        | 0         | 5        | 0         | 4         | 3         | 0        | 53       | 8         |
| 216      | 101       | 180      | 69        | 60        | 3         | 103      | 30       | 28        |
| 0        | 0         | 340      | 5         | 3         | 240       | 3        | 17       | 68        |
| 14       | 9         | 74       | 22        | 21        | 3         | 11       | 44       | 10        |
| 0        | 2         | 0        | 43        | 19        | 0         | 6        | 0        | 0         |
| 26       | 0         | 23       | 4         | 0         | 107       | 56       | 5        | 21        |
| 0        | 0         | 21       | 0         | 0         | 4         | 0        | 0        | 32        |

|     |     |     |     |     |     |     |     |     |
|-----|-----|-----|-----|-----|-----|-----|-----|-----|
| 0   | 38  | 0   | 67  | 6   | 0   | 0   | 0   | 0   |
| 3   | 14  | 22  | 71  | 48  | 0   | 0   | 0   | 0   |
| 9   | 53  | 9   | 161 | 165 | 0   | 2   | 109 | 71  |
| 141 | 6   | 51  | 34  | 9   | 84  | 20  | 31  | 65  |
| 0   | 0   | 20  | 27  | 9   | 7   | 38  | 0   | 13  |
| 89  | 41  | 111 | 118 | 101 | 2   | 13  | 56  | 145 |
| 42  | 52  | 97  | 69  | 3   | 4   | 15  | 88  | 16  |
| 48  | 2   | 87  | 2   | 0   | 4   | 125 | 142 | 42  |
| 0   | 4   | 67  | 35  | 0   | 21  | 0   | 89  | 0   |
| 0   | 0   | 7   | 0   | 0   | 11  | 0   | 0   | 0   |
| 0   | 6   | 23  | 11  | 0   | 15  | 0   | 0   | 0   |
| 0   | 0   | 12  | 0   | 0   | 11  | 0   | 0   | 0   |
| 0   | 0   | 0   | 0   | 42  | 0   | 0   | 0   | 0   |
| 6   | 14  | 23  | 38  | 5   | 0   | 19  | 23  | 26  |
| 7   | 0   | 2   | 0   | 0   | 9   | 8   | 0   | 7   |
| 0   | 0   | 0   | 0   | 0   | 0   | 0   | 3   | 0   |
| 19  | 75  | 0   | 85  | 2   | 0   | 0   | 3   | 0   |
| 21  | 0   | 0   | 0   | 0   | 12  | 0   | 3   | 13  |
| 0   | 0   | 15  | 2   | 0   | 0   | 61  | 2   | 15  |
| 22  | 3   | 22  | 2   | 4   | 0   | 0   | 27  | 30  |
| 133 | 68  | 16  | 58  | 16  | 0   | 4   | 52  | 0   |
| 214 | 0   | 19  | 0   | 0   | 120 | 9   | 22  | 37  |
| 17  | 0   | 19  | 0   | 2   | 20  | 6   | 9   | 108 |
| 0   | 0   | 0   | 0   | 2   | 0   | 0   | 0   | 4   |
| 0   | 3   | 124 | 2   | 0   | 350 | 0   | 0   | 12  |
| 0   | 38  | 2   | 81  | 13  | 0   | 0   | 0   | 0   |
| 0   | 0   | 0   | 0   | 0   | 0   | 5   | 2   | 0   |
| 2   | 0   | 2   | 8   | 18  | 0   | 0   | 0   | 0   |
| 0   | 3   | 59  | 2   | 0   | 7   | 0   | 9   | 49  |
| 0   | 0   | 136 | 11  | 4   | 41  | 78  | 11  | 36  |
| 4   | 2   | 0   | 8   | 6   | 13  | 6   | 7   | 3   |
| 0   | 0   | 0   | 88  | 0   | 0   | 0   | 0   | 0   |
| 43  | 4   | 11  | 0   | 7   | 0   | 19  | 0   | 20  |
| 0   | 0   | 0   | 6   | 0   | 0   | 0   | 0   | 0   |
| 0   | 0   | 12  | 0   | 0   | 20  | 0   | 2   | 44  |
| 0   | 0   | 0   | 0   | 0   | 13  | 29  | 4   | 10  |
| 0   | 0   | 2   | 0   | 0   | 30  | 67  | 0   | 18  |
| 0   | 0   | 0   | 6   | 0   | 20  | 0   | 5   | 5   |
| 8   | 8   | 32  | 0   | 0   | 0   | 40  | 0   | 132 |
| 0   | 0   | 3   | 0   | 0   | 34  | 2   | 0   | 17  |
| 56  | 9   | 21  | 44  | 6   | 0   | 0   | 8   | 12  |
| 45  | 14  | 27  | 20  | 42  | 0   | 2   | 7   | 4   |
| 7   | 8   | 5   | 39  | 14  | 0   | 0   | 0   | 0   |
| 22  | 4   | 70  | 23  | 10  | 2   | 28  | 9   | 13  |
| 2   | 0   | 18  | 8   | 0   | 34  | 12  | 0   | 20  |
| 0   | 122 | 332 | 122 | 9   | 66  | 43  | 192 | 165 |
| 0   | 0   | 13  | 0   | 5   | 70  | 113 | 128 | 10  |
| 0   | 0   | 0   | 0   | 0   | 30  | 4   | 0   | 3   |
| 0   | 0   | 2   | 0   | 0   | 0   | 52  | 0   | 0   |
| 40  | 11  | 19  | 0   | 11  | 24  | 9   | 4   | 12  |

|     |     |     |    |     |     |     |     |     |
|-----|-----|-----|----|-----|-----|-----|-----|-----|
| 0   | 11  | 0   | 4  | 0   | 0   | 0   | 0   | 0   |
| 16  | 84  | 63  | 65 | 28  | 0   | 31  | 19  | 14  |
| 0   | 0   | 23  | 0  | 79  | 0   | 0   | 21  | 26  |
| 18  | 28  | 203 | 35 | 37  | 11  | 63  | 156 | 40  |
| 0   | 0   | 0   | 0  | 90  | 0   | 0   | 0   | 0   |
| 23  | 0   | 41  | 0  | 0   | 0   | 14  | 121 | 12  |
| 0   | 31  | 0   | 13 | 0   | 0   | 0   | 0   | 0   |
| 0   | 0   | 4   | 0  | 0   | 0   | 0   | 0   | 0   |
| 182 | 212 | 948 | 28 | 220 | 2   | 4   | 411 | 437 |
| 0   | 0   | 2   | 0  | 0   | 0   | 0   | 0   | 5   |
| 10  | 0   | 4   | 0  | 0   | 19  | 12  | 7   | 4   |
| 0   | 0   | 8   | 3  | 0   | 3   | 3   | 0   | 0   |
| 45  | 2   | 13  | 7  | 9   | 8   | 3   | 12  | 3   |
| 0   | 0   | 0   | 0  | 0   | 0   | 0   | 0   | 0   |
| 0   | 0   | 0   | 0  | 0   | 76  | 15  | 16  | 10  |
| 3   | 4   | 11  | 8  | 0   | 5   | 38  | 12  | 53  |
| 47  | 10  | 11  | 8  | 10  | 20  | 9   | 6   | 20  |
| 65  | 0   | 0   | 0  | 0   | 0   | 0   | 2   | 12  |
| 0   | 2   | 0   | 0  | 0   | 2   | 0   | 5   | 5   |
| 161 | 21  | 460 | 64 | 16  | 107 | 349 | 146 | 314 |
| 0   | 0   | 4   | 0  | 7   | 0   | 0   | 0   | 0   |
| 33  | 0   | 30  | 11 | 3   | 10  | 109 | 8   | 23  |
| 0   | 4   | 26  | 12 | 19  | 13  | 0   | 0   | 0   |
| 0   | 0   | 0   | 0  | 0   | 0   | 0   | 0   | 0   |
| 0   | 0   | 43  | 0  | 0   | 0   | 55  | 53  | 15  |
| 52  | 0   | 50  | 8  | 10  | 2   | 26  | 22  | 13  |
| 0   | 0   | 0   | 0  | 2   | 0   | 0   | 0   | 42  |
| 28  | 24  | 98  | 11 | 17  | 0   | 4   | 34  | 11  |
| 0   | 2   | 0   | 5  | 0   | 0   | 8   | 26  | 0   |
| 0   | 0   | 0   | 0  | 3   | 0   | 0   | 0   | 0   |
| 0   | 3   | 4   | 4  | 0   | 2   | 0   | 14  | 172 |
| 0   | 6   | 2   | 41 | 0   | 0   | 0   | 0   | 0   |
| 0   | 2   | 0   | 13 | 0   | 0   | 0   | 25  | 2   |
| 0   | 0   | 61  | 0  | 0   | 41  | 0   | 0   | 0   |
| 0   | 0   | 0   | 0  | 0   | 16  | 0   | 0   | 0   |
| 18  | 13  | 0   | 14 | 5   | 0   | 0   | 0   | 0   |
| 0   | 62  | 0   | 67 | 175 | 0   | 0   | 0   | 0   |
| 0   | 0   | 0   | 3  | 0   | 0   | 0   | 0   | 0   |
| 0   | 0   | 0   | 7  | 18  | 0   | 0   | 0   | 0   |
| 0   | 0   | 0   | 25 | 2   | 0   | 0   | 0   | 3   |
| 0   | 0   | 85  | 0  | 0   | 4   | 0   | 0   | 2   |
| 0   | 4   | 0   | 0  | 0   | 0   | 0   | 0   | 0   |
| 0   | 0   | 0   | 0  | 0   | 2   | 0   | 0   | 0   |
| 62  | 6   | 22  | 0  | 0   | 38  | 2   | 0   | 28  |
| 39  | 67  | 38  | 0  | 19  | 0   | 3   | 24  | 9   |
| 0   | 71  | 0   | 7  | 30  | 0   | 0   | 0   | 0   |
| 18  | 60  | 3   | 75 | 308 | 0   | 0   | 0   | 3   |
| 0   | 2   | 0   | 15 | 15  | 0   | 0   | 0   | 0   |
| 0   | 37  | 0   | 0  | 2   | 0   | 0   | 0   | 0   |
| 6   | 7   | 6   | 14 | 20  | 0   | 0   | 0   | 0   |

|     |      |     |     |      |      |     |     |     |
|-----|------|-----|-----|------|------|-----|-----|-----|
| 56  | 4    | 6   | 4   | 0    | 20   | 10  | 5   | 14  |
| 0   | 0    | 2   | 0   | 0    | 16   | 80  | 81  | 2   |
| 38  | 5    | 3   | 0   | 0    | 30   | 0   | 2   | 4   |
| 0   | 0    | 0   | 2   | 0    | 260  | 0   | 0   | 0   |
| 0   | 47   | 9   | 14  | 114  | 3    | 0   | 0   | 11  |
| 8   | 35   | 10  | 14  | 23   | 0    | 2   | 85  | 0   |
| 0   | 0    | 0   | 9   | 0    | 0    | 0   | 0   | 0   |
| 0   | 0    | 0   | 0   | 0    | 0    | 0   | 0   | 0   |
| 0   | 0    | 0   | 0   | 11   | 0    | 0   | 0   | 0   |
| 582 | 0    | 46  | 14  | 0    | 62   | 468 | 68  | 44  |
| 0   | 0    | 3   | 2   | 2    | 69   | 14  | 11  | 54  |
| 0   | 0    | 22  | 3   | 65   | 9    | 11  | 4   | 16  |
| 0   | 0    | 0   | 0   | 0    | 35   | 0   | 0   | 5   |
| 0   | 4    | 156 | 0   | 0    | 10   | 2   | 2   | 6   |
| 3   | 0    | 0   | 0   | 0    | 0    | 3   | 2   | 2   |
| 0   | 0    | 0   | 0   | 0    | 0    | 0   | 0   | 0   |
| 0   | 0    | 0   | 0   | 0    | 0    | 0   | 0   | 0   |
| 0   | 0    | 6   | 0   | 0    | 0    | 0   | 18  | 2   |
| 344 | 1353 | 244 | 867 | 1409 | 4    | 58  | 26  | 169 |
| 0   | 140  | 9   | 56  | 60   | 0    | 0   | 0   | 0   |
| 0   | 2    | 8   | 2   | 0    | 0    | 17  | 0   | 0   |
| 15  | 0    | 14  | 0   | 2    | 26   | 3   | 0   | 8   |
| 11  | 55   | 79  | 231 | 41   | 81   | 62  | 279 | 341 |
| 33  | 0    | 0   | 0   | 3    | 0    | 237 | 62  | 0   |
| 0   | 36   | 0   | 61  | 0    | 0    | 0   | 0   | 0   |
| 24  | 0    | 36  | 24  | 31   | 10   | 26  | 24  | 38  |
| 0   | 0    | 0   | 4   | 12   | 0    | 0   | 0   | 0   |
| 17  | 176  | 22  | 281 | 172  | 0    | 2   | 0   | 0   |
| 0   | 0    | 10  | 0   | 0    | 34   | 2   | 38  | 13  |
| 209 | 109  | 130 | 35  | 44   | 86   | 19  | 12  | 52  |
| 0   | 0    | 85  | 0   | 3    | 85   | 12  | 3   | 82  |
| 0   | 15   | 0   | 0   | 42   | 0    | 2   | 0   | 0   |
| 0   | 0    | 189 | 0   | 0    | 51   | 0   | 6   | 0   |
| 0   | 126  | 0   | 47  | 58   | 0    | 0   | 0   | 0   |
| 0   | 0    | 0   | 0   | 0    | 5    | 0   | 0   | 9   |
| 0   | 0    | 8   | 0   | 0    | 118  | 27  | 24  | 37  |
| 0   | 0    | 0   | 0   | 0    | 80   | 44  | 377 | 11  |
| 0   | 0    | 2   | 0   | 0    | 1882 | 0   | 0   | 859 |
| 0   | 0    | 0   | 2   | 4    | 7    | 0   | 0   | 0   |
| 0   | 92   | 2   | 5   | 14   | 14   | 3   | 2   | 0   |
| 0   | 4    | 129 | 3   | 11   | 0    | 240 | 0   | 141 |
| 262 | 203  | 787 | 223 | 132  | 3    | 540 | 236 | 83  |
| 48  | 0    | 0   | 0   | 0    | 0    | 0   | 0   | 0   |
| 105 | 8    | 214 | 63  | 12   | 8    | 101 | 32  | 142 |
| 5   | 14   | 0   | 43  | 4    | 34   | 0   | 37  | 0   |
| 0   | 116  | 0   | 0   | 6    | 0    | 0   | 0   | 0   |
| 0   | 13   | 0   | 8   | 7    | 0    | 0   | 0   | 0   |
| 0   | 2    | 12  | 0   | 0    | 18   | 0   | 4   | 3   |
| 52  | 0    | 0   | 0   | 0    | 6    | 8   | 2   | 6   |
| 72  | 122  | 0   | 128 | 301  | 0    | 0   | 0   | 0   |

|      |     |      |     |     |     |     |      |     |
|------|-----|------|-----|-----|-----|-----|------|-----|
| 0    | 4   | 0    | 16  | 0   | 0   | 0   | 0    | 0   |
| 0    | 0   | 0    | 0   | 0   | 0   | 0   | 0    | 0   |
| 0    | 6   | 0    | 0   | 43  | 4   | 0   | 0    | 0   |
| 391  | 0   | 2    | 0   | 0   | 51  | 2   | 21   | 29  |
| 15   | 215 | 5    | 211 | 318 | 0   | 11  | 18   | 0   |
| 0    | 0   | 0    | 0   | 0   | 15  | 18  | 4    | 0   |
| 0    | 0   | 0    | 0   | 146 | 0   | 0   | 0    | 0   |
| 35   | 19  | 132  | 92  | 23  | 20  | 157 | 81   | 162 |
| 0    | 0   | 0    | 0   | 0   | 40  | 0   | 0    | 0   |
| 0    | 0   | 0    | 0   | 0   | 127 | 0   | 0    | 0   |
| 280  | 0   | 268  | 0   | 2   | 60  | 0   | 7    | 22  |
| 0    | 95  | 15   | 0   | 0   | 41  | 0   | 0    | 58  |
| 0    | 0   | 2    | 7   | 10  | 6   | 0   | 4    | 0   |
| 2    | 0   | 0    | 5   | 0   | 0   | 59  | 4    | 2   |
| 0    | 0   | 46   | 0   | 0   | 14  | 2   | 2    | 0   |
| 549  | 962 | 1894 | 659 | 226 | 29  | 498 | 4106 | 453 |
| 0    | 0   | 0    | 2   | 0   | 2   | 0   | 0    | 0   |
| 0    | 0   | 58   | 0   | 0   | 47  | 2   | 0    | 52  |
| 0    | 0   | 0    | 0   | 0   | 0   | 0   | 0    | 0   |
| 104  | 7   | 22   | 0   | 12  | 0   | 38  | 15   | 7   |
| 31   | 42  | 10   | 265 | 100 | 0   | 6   | 9    | 15  |
| 6    | 14  | 103  | 2   | 0   | 90  | 54  | 29   | 124 |
| 92   | 54  | 78   | 22  | 14  | 7   | 166 | 73   | 50  |
| 25   | 4   | 23   | 4   | 15  | 63  | 16  | 6    | 11  |
| 0    | 0   | 15   | 0   | 0   | 78  | 0   | 0    | 0   |
| 0    | 18  | 0    | 2   | 68  | 0   | 0   | 0    | 0   |
| 0    | 0   | 11   | 0   | 0   | 15  | 16  | 0    | 8   |
| 1524 | 0   | 1277 | 0   | 4   | 666 | 0   | 46   | 117 |
| 0    | 0   | 4    | 0   | 0   | 0   | 6   | 4    | 5   |
| 0    | 2   | 48   | 0   | 0   | 174 | 24  | 31   | 36  |
| 21   | 2   | 18   | 0   | 9   | 166 | 96  | 51   | 262 |
| 0    | 0   | 52   | 0   | 0   | 0   | 63  | 2    | 14  |
| 0    | 2   | 0    | 0   | 12  | 0   | 0   | 0    | 0   |
| 0    | 3   | 0    | 31  | 409 | 0   | 0   | 0    | 0   |
| 3    | 0   | 0    | 0   | 0   | 0   | 0   | 0    | 14  |
| 0    | 0   | 0    | 2   | 0   | 0   | 0   | 0    | 0   |
| 0    | 0   | 0    | 0   | 0   | 0   | 5   | 0    | 26  |
| 4    | 0   | 3    | 0   | 2   | 14  | 4   | 0    | 7   |
| 0    | 38  | 148  | 29  | 21  | 10  | 0   | 0    | 7   |
| 0    | 36  | 0    | 125 | 137 | 0   | 0   | 0    | 0   |
| 0    | 69  | 0    | 413 | 0   | 0   | 0   | 0    | 0   |
| 0    | 0   | 10   | 4   | 7   | 0   | 0   | 3    | 0   |
| 0    | 0   | 0    | 0   | 0   | 0   | 0   | 0    | 16  |
| 41   | 6   | 150  | 0   | 4   | 102 | 15  | 2    | 72  |
| 0    | 0   | 171  | 0   | 0   | 55  | 0   | 0    | 0   |
| 14   | 0   | 18   | 0   | 0   | 0   | 0   | 0    | 13  |
| 107  | 30  | 33   | 8   | 68  | 0   | 39  | 34   | 87  |
| 0    | 0   | 167  | 0   | 0   | 4   | 0   | 0    | 61  |
| 25   | 8   | 93   | 11  | 15  | 27  | 153 | 306  | 652 |
| 0    | 0   | 0    | 2   | 41  | 0   | 0   | 0    | 0   |

|             |             |             |             |             |             |             |             |             |
|-------------|-------------|-------------|-------------|-------------|-------------|-------------|-------------|-------------|
| 0           | 141         | 0           | 14          | 108         | 0           | 0           | 0           | 0           |
| 0           | 31          | 98          | 30          | 48          | 63          | 0           | 4           | 0           |
| 13          | 0           | 11          | 0           | 0           | 22          | 3           | 0           | 14          |
| 0           | 0           | 312         | 3           | 0           | 239         | 0           | 43          | 0           |
| 0           | 0           | 0           | 0           | 0           | 5           | 33          | 11          | 549         |
| 70          | 43          | 201         | 146         | 151         | 0           | 26          | 80          | 42          |
| 55          | 271         | 450         | 170         | 95          | 0           | 57          | 69          | 182         |
| 104         | 8           | 6           | 14          | 60          | 77          | 5           | 2           | 37          |
| 0           | 76          | 342         | 0           | 11          | 0           | 135         | 340         | 178         |
| 107         | 0           | 130         | 13          | 0           | 9           | 10          | 3           | 70          |
| 0           | 2           | 30          | 5           | 8           | 64          | 44          | 0           | 51          |
| 9           | 5           | 40          | 27          | 14          | 0           | 58          | 37          | 71          |
| 14          | 344         | 0           | 794         | 1027        | 0           | 0           | 0           | 0           |
| 33          | 66          | 154         | 185         | 19          | 3           | 35          | 14          | 63          |
| 0           | 0           | 2           | 0           | 0           | 87          | 0           | 0           | 14          |
| 40          | 0           | 6           | 10          | 0           | 5           | 76          | 3           | 4           |
| 0           | 0           | 0           | 44          | 143         | 0           | 0           | 0           | 0           |
| 0           | 0           | 0           | 0           | 0           | 0           | 0           | 0           | 0           |
| 0           | 195         | 233         | 94          | 8           | 30          | 46          | 222         | 183         |
| 0           | 0           | 0           | 0           | 0           | 0           | 0           | 0           | 0           |
| 0           | 25          | 55          | 0           | 2           | 155         | 0           | 20          | 48          |
| 9           | 0           | 23          | 0           | 5           | 0           | 9           | 118         | 10          |
| 0           | 0           | 0           | 0           | 33          | 0           | 38          | 0           | 0           |
| 0           | 6           | 0           | 0           | 0           | 0           | 0           | 0           | 0           |
| 0           | 4           | 14          | 34          | 0           | 10          | 0           | 0           | 18          |
| 101         | 5           | 54          | 29          | 5           | 114         | 38          | 13          | 74          |
| 13          | 0           | 31          | 0           | 0           | 4           | 22          | 3           | 10          |
| 0           | 0           | 0           | 30          | 8           | 0           | 0           | 0           | 0           |
| 0           | 0           | 0           | 0           | 0           | 2           | 0           | 0           | 26          |
| 132         | 24          | 45          | 20          | 34          | 0           | 0           | 0           | 4           |
| 14          | 43          | 3           | 21          | 6           | 5           | 158         | 5           | 17          |
| 0           | 0           | 0           | 4           | 0           | 0           | 0           | 0           | 0           |
| 65          | 0           | 8           | 6           | 0           | 14          | 20          | 3           | 26          |
| 0           | 0           | 0           | 0           | 0           | 0           | 0           | 0           | 0           |
| <b>5838</b> | <b>5597</b> | <b>9356</b> | <b>5746</b> | <b>6074</b> | <b>5835</b> | <b>4166</b> | <b>7202</b> | <b>6207</b> |



|    |     |     |     |     |      |     |     |     |
|----|-----|-----|-----|-----|------|-----|-----|-----|
| 54 | 0   | 26  | 61  | 40  | 0    | 0   | 0   | 0   |
| 9  | 4   | 120 | 9   | 0   | 0    | 0   | 7   | 0   |
| 41 | 16  | 65  | 36  | 51  | 14   | 5   | 57  | 0   |
| 2  | 49  | 28  | 34  | 20  | 106  | 49  | 34  | 342 |
| 0  | 9   | 0   | 3   | 21  | 0    | 0   | 0   | 3   |
| 47 | 71  | 118 | 114 | 91  | 34   | 28  | 159 | 0   |
| 7  | 30  | 21  | 24  | 46  | 23   | 8   | 57  | 0   |
| 0  | 0   | 0   | 0   | 88  | 0    | 0   | 0   | 98  |
| 13 | 5   | 0   | 16  | 93  | 2    | 0   | 0   | 0   |
| 6  | 12  | 19  | 3   | 0   | 4    | 4   | 8   | 35  |
| 0  | 10  | 84  | 10  | 0   | 2    | 0   | 0   | 0   |
| 0  | 0   | 0   | 0   | 0   | 0    | 0   | 0   | 0   |
| 2  | 0   | 0   | 0   | 35  | 0    | 0   | 0   | 0   |
| 16 | 21  | 19  | 7   | 55  | 12   | 4   | 9   | 0   |
| 0  | 8   | 0   | 0   | 5   | 2    | 46  | 0   | 4   |
| 0  | 5   | 0   | 0   | 10  | 0    | 0   | 0   | 0   |
| 30 | 11  | 125 | 55  | 15  | 2    | 4   | 109 | 0   |
| 0  | 3   | 0   | 0   | 5   | 15   | 70  | 0   | 18  |
| 0  | 0   | 4   | 0   | 25  | 0    | 168 | 0   | 0   |
| 0  | 3   | 41  | 6   | 4   | 5    | 0   | 13  | 0   |
| 14 | 10  | 7   | 30  | 33  | 0    | 0   | 20  | 0   |
| 0  | 9   | 0   | 26  | 20  | 33   | 91  | 0   | 89  |
| 2  | 32  | 9   | 19  | 11  | 5    | 42  | 0   | 14  |
| 0  | 0   | 0   | 33  | 0   | 0    | 0   | 54  | 0   |
| 0  | 10  | 0   | 8   | 8   | 0    | 75  | 0   | 2   |
| 21 | 45  | 46  | 14  | 55  | 0    | 0   | 2   | 0   |
| 2  | 0   | 0   | 8   | 17  | 0    | 0   | 0   | 0   |
| 0  | 0   | 2   | 3   | 2   | 0    | 0   | 4   | 0   |
| 0  | 13  | 2   | 5   | 4   | 9    | 0   | 9   | 5   |
| 9  | 20  | 0   | 7   | 69  | 0    | 2   | 0   | 87  |
| 0  | 9   | 2   | 37  | 13  | 5    | 3   | 19  | 6   |
| 58 | 0   | 0   | 24  | 54  | 0    | 0   | 0   | 0   |
| 2  | 4   | 6   | 3   | 28  | 0    | 5   | 5   | 0   |
| 9  | 0   | 0   | 4   | 2   | 0    | 0   | 0   | 0   |
| 0  | 8   | 5   | 4   | 3   | 15   | 36  | 0   | 40  |
| 0  | 7   | 3   | 0   | 26  | 32   | 5   | 0   | 139 |
| 0  | 2   | 0   | 0   | 0   | 0    | 0   | 0   | 0   |
| 0  | 6   | 0   | 14  | 25  | 3    | 0   | 0   | 0   |
| 0  | 0   | 0   | 0   | 8   | 0    | 0   | 2   | 0   |
| 0  | 8   | 0   | 10  | 0   | 45   | 0   | 0   | 0   |
| 0  | 11  | 28  | 10  | 14  | 0    | 0   | 29  | 0   |
| 20 | 0   | 12  | 13  | 39  | 0    | 8   | 15  | 0   |
| 6  | 8   | 26  | 14  | 9   | 5    | 11  | 8   | 0   |
| 0  | 28  | 38  | 13  | 89  | 16   | 15  | 6   | 0   |
| 3  | 9   | 0   | 0   | 0   | 9    | 0   | 78  | 0   |
| 18 | 109 | 0   | 47  | 261 | 31   | 18  | 19  | 85  |
| 0  | 8   | 7   | 19  | 19  | 1196 | 146 | 0   | 126 |
| 0  | 2   | 0   | 2   | 3   | 10   | 0   | 0   | 14  |
| 0  | 0   | 11  | 0   | 3   | 0    | 0   | 0   | 2   |
| 3  | 16  | 9   | 3   | 9   | 29   | 4   | 7   | 9   |



|    |     |      |    |     |      |     |     |      |
|----|-----|------|----|-----|------|-----|-----|------|
| 7  | 0   | 0    | 6  | 12  | 0    | 0   | 0   | 0    |
| 10 | 8   | 21   | 27 | 51  | 0    | 3   | 49  | 0    |
| 24 | 91  | 56   | 12 | 181 | 112  | 8   | 0   | 11   |
| 16 | 31  | 56   | 36 | 125 | 24   | 5   | 21  | 3    |
| 17 | 0   | 2    | 0  | 0   | 0    | 0   | 0   | 0    |
| 0  | 19  | 0    | 0  | 31  | 17   | 0   | 0   | 11   |
| 19 | 0   | 0    | 18 | 3   | 0    | 0   | 0   | 0    |
| 89 | 0   | 0    | 0  | 20  | 0    | 0   | 0   | 0    |
| 64 | 83  | 189  | 66 | 192 | 103  | 3   | 466 | 2    |
| 0  | 3   | 9    | 0  | 0   | 0    | 0   | 0   | 0    |
| 0  | 10  | 0    | 0  | 12  | 29   | 0   | 0   | 0    |
| 0  | 0   | 5    | 0  | 0   | 0    | 0   | 0   | 2    |
| 6  | 7   | 10   | 5  | 3   | 52   | 28  | 0   | 0    |
| 0  | 0   | 0    | 0  | 0   | 0    | 0   | 0   | 0    |
| 0  | 16  | 0    | 0  | 25  | 96   | 23  | 0   | 35   |
| 4  | 41  | 9    | 2  | 78  | 23   | 6   | 9   | 14   |
| 4  | 34  | 17   | 16 | 15  | 25   | 37  | 10  | 5    |
| 0  | 0   | 0    | 0  | 2   | 0    | 0   | 0   | 6    |
| 2  | 17  | 33   | 0  | 0   | 0    | 0   | 3   | 0    |
| 0  | 310 | 8    | 22 | 358 | 336  | 651 | 11  | 1293 |
| 0  | 0   | 0    | 4  | 0   | 0    | 0   | 0   | 9    |
| 0  | 58  | 3    | 0  | 63  | 9    | 44  | 2   | 163  |
| 3  | 18  | 0    | 0  | 94  | 116  | 0   | 0   | 0    |
| 0  | 0   | 0    | 0  | 0   | 0    | 0   | 0   | 0    |
| 0  | 7   | 0    | 0  | 57  | 6    | 0   | 0   | 52   |
| 0  | 17  | 7    | 5  | 78  | 9    | 106 | 12  | 0    |
| 0  | 0   | 0    | 0  | 0   | 33   | 0   | 0   | 0    |
| 4  | 14  | 18   | 19 | 45  | 6    | 3   | 12  | 0    |
| 3  | 0   | 0    | 0  | 87  | 0    | 0   | 0   | 0    |
| 0  | 0   | 4    | 0  | 0   | 0    | 0   | 0   | 0    |
| 0  | 18  | 0    | 0  | 2   | 15   | 6   | 0   | 0    |
| 64 | 0   | 0    | 0  | 5   | 0    | 0   | 0   | 0    |
| 2  | 0   | 8    | 10 | 9   | 0    | 0   | 0   | 0    |
| 0  | 0   | 0    | 0  | 0   | 0    | 0   | 0   | 0    |
| 0  | 0   | 0    | 0  | 0   | 0    | 0   | 0   | 73   |
| 4  | 3   | 20   | 4  | 10  | 0    | 0   | 0   | 0    |
| 82 | 0   | 4    | 0  | 145 | 0    | 0   | 0   | 0    |
| 0  | 0   | 0    | 0  | 6   | 0    | 0   | 0   | 0    |
| 2  | 0   | 55   | 0  | 9   | 0    | 0   | 0   | 0    |
| 0  | 6   | 0    | 55 | 0   | 0    | 0   | 0   | 0    |
| 0  | 0   | 0    | 0  | 0   | 0    | 0   | 5   | 0    |
| 0  | 0   | 0    | 0  | 0   | 0    | 0   | 0   | 0    |
| 0  | 0   | 0    | 0  | 0   | 1539 | 0   | 0   | 0    |
| 0  | 15  | 0    | 54 | 6   | 40   | 17  | 9   | 13   |
| 8  | 8   | 35   | 6  | 21  | 3    | 0   | 17  | 0    |
| 2  | 4   | 5    | 8  | 4   | 0    | 0   | 47  | 0    |
| 70 | 0   | 1228 | 22 | 103 | 2    | 2   | 77  | 0    |
| 6  | 0   | 13   | 0  | 0   | 0    | 0   | 4   | 0    |
| 2  | 0   | 0    | 18 | 40  | 0    | 0   | 0   | 0    |
| 6  | 4   | 39   | 0  | 5   | 0    | 0   | 2   | 0    |

|     |      |      |     |     |     |     |     |     |
|-----|------|------|-----|-----|-----|-----|-----|-----|
| 0   | 6    | 9    | 19  | 10  | 14  | 0   | 36  | 0   |
| 0   | 113  | 0    | 0   | 187 | 13  | 78  | 0   | 0   |
| 0   | 20   | 0    | 14  | 4   | 9   | 9   | 0   | 6   |
| 0   | 204  | 0    | 0   | 0   | 0   | 2   | 0   | 0   |
| 2   | 10   | 0    | 0   | 0   | 24  | 0   | 0   | 28  |
| 0   | 7    | 35   | 32  | 19  | 0   | 0   | 0   | 0   |
| 5   | 0    | 4    | 15  | 0   | 0   | 0   | 6   | 0   |
| 0   | 15   | 0    | 0   | 0   | 29  | 0   | 0   | 0   |
| 0   | 0    | 28   | 4   | 0   | 0   | 0   | 0   | 0   |
| 0   | 6    | 0    | 0   | 204 | 70  | 129 | 2   | 165 |
| 0   | 9    | 0    | 25  | 16  | 8   | 11  | 0   | 17  |
| 0   | 2    | 2    | 0   | 2   | 0   | 0   | 3   | 23  |
| 0   | 29   | 0    | 0   | 54  | 0   | 0   | 0   | 0   |
| 0   | 6    | 0    | 8   | 15  | 0   | 4   | 0   | 4   |
| 2   | 0    | 0    | 2   | 0   | 22  | 4   | 4   | 9   |
| 190 | 0    | 0    | 0   | 101 | 0   | 0   | 0   | 0   |
| 0   | 0    | 0    | 0   | 0   | 0   | 0   | 0   | 0   |
| 0   | 0    | 0    | 0   | 5   | 0   | 0   | 0   | 0   |
| 265 | 24   | 2590 | 452 | 401 | 22  | 0   | 843 | 4   |
| 59  | 0    | 0    | 0   | 34  | 0   | 0   | 0   | 0   |
| 0   | 0    | 0    | 0   | 6   | 0   | 0   | 0   | 10  |
| 0   | 8    | 0    | 3   | 6   | 29  | 0   | 0   | 23  |
| 78  | 1435 | 54   | 111 | 642 | 65  | 95  | 27  | 111 |
| 0   | 10   | 11   | 37  | 31  | 0   | 7   | 0   | 48  |
| 19  | 0    | 0    | 75  | 37  | 0   | 0   | 0   | 0   |
| 2   | 25   | 51   | 5   | 20  | 24  | 31  | 10  | 18  |
| 4   | 4    | 100  | 5   | 0   | 0   | 0   | 0   | 0   |
| 169 | 27   | 187  | 188 | 159 | 0   | 6   | 278 | 0   |
| 0   | 5    | 0    | 3   | 21  | 10  | 68  | 0   | 5   |
| 13  | 76   | 53   | 354 | 75  | 162 | 39  | 136 | 37  |
| 0   | 7    | 0    | 0   | 3   | 42  | 23  | 0   | 13  |
| 82  | 0    | 0    | 0   | 3   | 0   | 0   | 0   | 0   |
| 0   | 145  | 0    | 9   | 29  | 4   | 0   | 0   | 6   |
| 164 | 0    | 0    | 65  | 136 | 0   | 0   | 0   | 0   |
| 0   | 0    | 0    | 21  | 38  | 0   | 0   | 94  | 0   |
| 0   | 22   | 0    | 0   | 44  | 20  | 16  | 0   | 2   |
| 0   | 32   | 0    | 0   | 103 | 0   | 0   | 0   | 0   |
| 9   | 1720 | 0    | 0   | 2   | 0   | 0   | 0   | 0   |
| 0   | 0    | 0    | 10  | 21  | 0   | 0   | 0   | 0   |
| 15  | 22   | 42   | 412 | 73  | 0   | 22  | 11  | 0   |
| 4   | 64   | 4    | 0   | 213 | 76  | 0   | 0   | 4   |
| 48  | 131  | 143  | 162 | 325 | 5   | 31  | 135 | 0   |
| 0   | 0    | 0    | 0   | 2   | 0   | 315 | 0   | 22  |
| 7   | 0    | 35   | 17  | 89  | 0   | 28  | 23  | 21  |
| 4   | 0    | 0    | 12  | 40  | 0   | 19  | 0   | 0   |
| 0   | 0    | 0    | 0   | 0   | 0   | 0   | 0   | 0   |
| 0   | 0    | 53   | 2   | 6   | 0   | 0   | 9   | 0   |
| 3   | 0    | 0    | 24  | 0   | 3   | 9   | 0   | 0   |
| 0   | 11   | 0    | 12  | 6   | 16  | 0   | 0   | 25  |
| 74  | 3    | 761  | 25  | 13  | 0   | 0   | 164 | 0   |

|     |     |     |      |      |      |     |     |     |
|-----|-----|-----|------|------|------|-----|-----|-----|
| 0   | 0   | 0   | 40   | 18   | 0    | 0   | 0   | 73  |
| 0   | 0   | 0   | 0    | 0    | 0    | 0   | 0   | 0   |
| 0   | 0   | 9   | 4    | 0    | 0    | 0   | 0   | 0   |
| 0   | 20  | 0   | 47   | 42   | 8    | 71  | 0   | 11  |
| 64  | 13  | 123 | 67   | 134  | 11   | 0   | 63  | 0   |
| 0   | 10  | 0   | 0    | 0    | 0    | 101 | 0   | 0   |
| 0   | 0   | 0   | 5    | 2    | 0    | 0   | 0   | 0   |
| 8   | 49  | 71  | 46   | 165  | 43   | 44  | 47  | 156 |
| 0   | 0   | 0   | 0    | 0    | 0    | 0   | 0   | 0   |
| 0   | 0   | 0   | 0    | 0    | 0    | 0   | 0   | 0   |
| 0   | 67  | 2   | 0    | 48   | 327  | 772 | 0   | 2   |
| 3   | 26  | 0   | 0    | 9    | 53   | 0   | 0   | 15  |
| 0   | 18  | 55  | 0    | 55   | 0    | 0   | 0   | 115 |
| 0   | 6   | 13  | 0    | 2    | 2    | 12  | 0   | 69  |
| 0   | 14  | 0   | 0    | 54   | 2    | 0   | 0   | 12  |
| 127 | 161 | 68  | 299  | 1371 | 143  | 29  | 231 | 440 |
| 3   | 0   | 0   | 0    | 4    | 4    | 0   | 0   | 0   |
| 0   | 0   | 0   | 0    | 0    | 0    | 0   | 8   | 46  |
| 0   | 167 | 0   | 0    | 37   | 40   | 0   | 0   | 66  |
| 0   | 14  | 20  | 8    | 24   | 17   | 2   | 4   | 14  |
| 66  | 37  | 366 | 30   | 77   | 4    | 11  | 246 | 0   |
| 0   | 45  | 3   | 69   | 126  | 49   | 107 | 2   | 283 |
| 6   | 15  | 9   | 33   | 146  | 6    | 0   | 12  | 0   |
| 0   | 16  | 6   | 18   | 25   | 39   | 20  | 2   | 41  |
| 0   | 0   | 0   | 0    | 0    | 0    | 0   | 0   | 0   |
| 17  | 0   | 10  | 97   | 5    | 0    | 5   | 4   | 0   |
| 0   | 0   | 0   | 2    | 42   | 2    | 11  | 0   | 6   |
| 0   | 345 | 0   | 2269 | 180  | 2203 | 927 | 514 | 234 |
| 0   | 0   | 0   | 0    | 26   | 2    | 148 | 9   | 10  |
| 0   | 71  | 0   | 7    | 90   | 72   | 177 | 0   | 243 |
| 0   | 3   | 0   | 10   | 136  | 25   | 447 | 45  | 234 |
| 0   | 114 | 0   | 0    | 0    | 13   | 2   | 0   | 4   |
| 2   | 0   | 84  | 9    | 2    | 17   | 0   | 7   | 0   |
| 90  | 0   | 0   | 0    | 11   | 0    | 0   | 6   | 0   |
| 0   | 5   | 0   | 0    | 4    | 0    | 3   | 0   | 10  |
| 0   | 123 | 0   | 3    | 0    | 0    | 77  | 0   | 0   |
| 0   | 0   | 4   | 0    | 16   | 0    | 0   | 0   | 3   |
| 0   | 0   | 44  | 7    | 3    | 0    | 0   | 0   | 8   |
| 117 | 0   | 0   | 46   | 6    | 0    | 0   | 0   | 0   |
| 77  | 0   | 0   | 45   | 51   | 0    | 0   | 0   | 0   |
| 439 | 0   | 0   | 328  | 14   | 0    | 0   | 0   | 0   |
| 3   | 5   | 9   | 13   | 16   | 0    | 0   | 13  | 29  |
| 0   | 0   | 0   | 106  | 0    | 0    | 0   | 7   | 5   |
| 0   | 67  | 4   | 13   | 2    | 58   | 82  | 45  | 12  |
| 0   | 0   | 0   | 0    | 0    | 0    | 0   | 0   | 0   |
| 0   | 0   | 0   | 17   | 9    | 0    | 0   | 2   | 0   |
| 6   | 60  | 154 | 25   | 50   | 12   | 0   | 43  | 0   |
| 0   | 47  | 0   | 402  | 0    | 0    | 0   | 72  | 21  |
| 0   | 29  | 2   | 15   | 422  | 145  | 37  | 7   | 115 |
| 0   | 0   | 128 | 41   | 99   | 0    | 0   | 2   | 0   |

|             |             |             |             |             |             |             |             |             |
|-------------|-------------|-------------|-------------|-------------|-------------|-------------|-------------|-------------|
| 39          | 0           | 121         | 53          | 72          | 0           | 0           | 11          | 0           |
| 14          | 70          | 0           | 0           | 305         | 502         | 0           | 0           | 0           |
| 0           | 9           | 0           | 20          | 21          | 41          | 4           | 0           | 355         |
| 0           | 379         | 0           | 0           | 6           | 149         | 0           | 0           | 0           |
| 0           | 43          | 0           | 0           | 326         | 45          | 0           | 2           | 8           |
| 29          | 32          | 49          | 38          | 81          | 39          | 13          | 6           | 23          |
| 45          | 34          | 89          | 58          | 180         | 0           | 0           | 132         | 13          |
| 3           | 50          | 13          | 91          | 3           | 49          | 10          | 20          | 2           |
| 0           | 18          | 0           | 21          | 378         | 0           | 2           | 0           | 0           |
| 0           | 46          | 30          | 11          | 56          | 54          | 249         | 15          | 30          |
| 0           | 33          | 22          | 14          | 9           | 16          | 42          | 4           | 25          |
| 0           | 29          | 22          | 7           | 69          | 2           | 265         | 11          | 67          |
| 122         | 0           | 1743        | 106         | 211         | 0           | 80          | 1543        | 0           |
| 36          | 64          | 0           | 58          | 96          | 8           | 43          | 161         | 25          |
| 0           | 8           | 0           | 0           | 0           | 12          | 0           | 0           | 2           |
| 4           | 31          | 0           | 0           | 28          | 0           | 38          | 6           | 49          |
| 0           | 0           | 10          | 0           | 124         | 0           | 0           | 70          | 0           |
| 0           | 0           | 0           | 0           | 0           | 0           | 0           | 0           | 0           |
| 13          | 43          | 5           | 48          | 192         | 35          | 16          | 7           | 47          |
| 0           | 0           | 0           | 0           | 6           | 0           | 0           | 0           | 9           |
| 16          | 92          | 0           | 0           | 20          | 95          | 0           | 0           | 0           |
| 0           | 5           | 3           | 2           | 34          | 0           | 0           | 2           | 0           |
| 0           | 0           | 0           | 0           | 2           | 0           | 0           | 0           | 0           |
| 0           | 0           | 171         | 3           | 0           | 0           | 0           | 135         | 156         |
| 0           | 0           | 11          | 0           | 2           | 0           | 0           | 0           | 0           |
| 4           | 80          | 50          | 136         | 74          | 220         | 88          | 27          | 164         |
| 0           | 0           | 10          | 0           | 5           | 0           | 0           | 2           | 2           |
| 3           | 0           | 0           | 0           | 0           | 0           | 0           | 92          | 0           |
| 0           | 19          | 0           | 0           | 2           | 0           | 0           | 0           | 0           |
| 8           | 0           | 34          | 40          | 8           | 0           | 0           | 10          | 0           |
| 9           | 20          | 0           | 29          | 270         | 9           | 60          | 0           | 45          |
| 0           | 0           | 0           | 0           | 0           | 0           | 0           | 0           | 0           |
| 0           | 15          | 8           | 11          | 22          | 15          | 16          | 0           | 37          |
| 0           | 0           | 0           | 0           | 0           | 0           | 0           | 0           | 0           |
| <b>2591</b> | <b>6726</b> | <b>7728</b> | <b>6957</b> | <b>9119</b> | <b>5219</b> | <b>4870</b> | <b>5392</b> | <b>3931</b> |

| 204_wt_12 | 324_wt_12 | 200_are_1 | 206_are_4 | 226_wt_4 | 357_wt_4 | 190_are_1 | 202_are_8 | 206_are_1 |
|-----------|-----------|-----------|-----------|----------|----------|-----------|-----------|-----------|
| 0         | 0         | 864       | 257       | 0        | 0        | 973       | 1055      | 968       |
| 6         | 0         | 51        | 559       | 108      | 203      | 89        | 199       | 111       |
| 0         | 2         | 0         | 0         | 0        | 4        | 0         | 0         | 0         |
| 12        | 2         | 0         | 5         | 33       | 70       | 0         | 0         | 0         |
| 0         | 12        | 0         | 7         | 37       | 2        | 0         | 2         | 0         |
| 0         | 0         | 54        | 0         | 0        | 0        | 116       | 0         | 0         |
| 17        | 30        | 22        | 61        | 34       | 16       | 3         | 103       | 22        |
| 0         | 0         | 19        | 83        | 20       | 0        | 70        | 94        | 0         |
| 0         | 0         | 186       | 32        | 0        | 2        | 466       | 36        | 94        |
| 0         | 0         | 22        | 13        | 0        | 0        | 24        | 38        | 17        |
| 0         | 92        | 0         | 0         | 0        | 0        | 0         | 0         | 0         |
| 22        | 0         | 0         | 13        | 0        | 0        | 4         | 18        | 18        |
| 0         | 0         | 2         | 0         | 0        | 0        | 0         | 0         | 0         |
| 6         | 0         | 32        | 77        | 36       | 217      | 5         | 0         | 18        |
| 0         | 8         | 3         | 0         | 0        | 2        | 0         | 0         | 0         |
| 22        | 3         | 29        | 11        | 0        | 0        | 36        | 44        | 8         |
| 0         | 37        | 5         | 182       | 5        | 3        | 0         | 4         | 0         |
| 0         | 101       | 0         | 0         | 0        | 0        | 0         | 0         | 0         |
| 23        | 150       | 0         | 0         | 95       | 21       | 0         | 0         | 0         |
| 103       | 0         | 0         | 0         | 0        | 0        | 0         | 0         | 0         |
| 0         | 0         | 11        | 72        | 0        | 4        | 0         | 0         | 38        |
| 31        | 3         | 40        | 84        | 0        | 0        | 71        | 39        | 16        |
| 4         | 0         | 24        | 41        | 0        | 0        | 51        | 13        | 14        |
| 19        | 0         | 462       | 4         | 767      | 2840     | 9         | 6         | 0         |
| 2         | 0         | 14        | 0         | 0        | 0        | 12        | 5         | 15        |
| 0         | 0         | 6         | 0         | 0        | 0        | 0         | 71        | 4         |
| 16        | 62        | 79        | 55        | 16       | 72       | 5         | 16        | 24        |
| 22        | 16        | 17        | 35        | 5        | 0        | 86        | 48        | 53        |
| 18        | 36        | 115       | 398       | 16       | 11       | 289       | 125       | 92        |
| 7         | 18        | 13        | 12        | 54       | 9        | 9         | 2         | 49        |
| 0         | 61        | 0         | 20        | 0        | 160      | 0         | 0         | 0         |
| 5         | 8         | 4         | 0         | 10       | 44       | 0         | 0         | 0         |
| 6         | 50        | 4         | 0         | 5        | 0        | 0         | 7         | 2         |
| 69        | 35        | 2         | 22        | 28       | 8        | 0         | 0         | 2         |
| 202       | 191       | 759       | 219       | 51       | 1400     | 155       | 174       | 310       |
| 2         | 13        | 73        | 60        | 0        | 4        | 8         | 11        | 16        |
| 49        | 5         | 61        | 4         | 5        | 8        | 44        | 17        | 56        |
| 61        | 19        | 72        | 8         | 4        | 5        | 0         | 0         | 0         |
| 80        | 0         | 237       | 10        | 0        | 5        | 0         | 115       | 20        |
| 0         | 0         | 27        | 51        | 0        | 0        | 42        | 17        | 21        |
| 0         | 0         | 0         | 0         | 0        | 0        | 0         | 0         | 164       |
| 0         | 0         | 0         | 25        | 71       | 0        | 10        | 0         | 6         |
| 7         | 0         | 0         | 3         | 8        | 0        | 0         | 0         | 0         |
| 34        | 2         | 13        | 19        | 24       | 7        | 80        | 84        | 46        |
| 127       | 276       | 25        | 306       | 0        | 405      | 0         | 0         | 14        |
| 13        | 32        | 39        | 68        | 14       | 6        | 10        | 14        | 28        |
| 0         | 4         | 28        | 40        | 0        | 0        | 26        | 0         | 0         |
| 0         | 78        | 21        | 0         | 51       | 90       | 2         | 0         | 2         |
| 0         | 0         | 0         | 0         | 52       | 6        | 0         | 0         | 0         |

|     |     |     |     |     |     |     |     |    |
|-----|-----|-----|-----|-----|-----|-----|-----|----|
| 0   | 0   | 62  | 23  | 0   | 0   | 57  | 38  | 75 |
| 0   | 0   | 7   | 47  | 0   | 0   | 27  | 17  | 33 |
| 51  | 10  | 63  | 129 | 43  | 2   | 108 | 222 | 54 |
| 22  | 103 | 109 | 44  | 60  | 314 | 9   | 25  | 28 |
| 5   | 12  | 8   | 3   | 14  | 0   | 0   | 2   | 4  |
| 92  | 52  | 187 | 444 | 11  | 5   | 262 | 259 | 97 |
| 31  | 15  | 7   | 4   | 6   | 0   | 31  | 87  | 34 |
| 14  | 14  | 0   | 0   | 81  | 31  | 0   | 0   | 0  |
| 69  | 0   | 21  | 0   | 0   | 0   | 15  | 6   | 35 |
| 19  | 5   | 0   | 0   | 0   | 11  | 4   | 0   | 0  |
| 0   | 6   | 0   | 2   | 50  | 6   | 0   | 0   | 0  |
| 0   | 9   | 0   | 0   | 0   | 0   | 0   | 0   | 0  |
| 0   | 0   | 37  | 0   | 0   | 0   | 26  | 3   | 14 |
| 8   | 17  | 15  | 17  | 4   | 14  | 14  | 20  | 2  |
| 0   | 14  | 3   | 2   | 0   | 0   | 0   | 0   | 0  |
| 0   | 0   | 0   | 0   | 144 | 0   | 0   | 0   | 0  |
| 0   | 9   | 20  | 0   | 0   | 0   | 39  | 541 | 43 |
| 4   | 0   | 0   | 0   | 48  | 0   | 0   | 0   | 0  |
| 0   | 2   | 0   | 0   | 27  | 0   | 0   | 0   | 0  |
| 36  | 7   | 0   | 2   | 2   | 0   | 2   | 21  | 9  |
| 36  | 11  | 11  | 25  | 0   | 0   | 95  | 99  | 19 |
| 2   | 28  | 4   | 113 | 46  | 2   | 0   | 0   | 2  |
| 21  | 7   | 6   | 0   | 0   | 29  | 0   | 0   | 0  |
| 4   | 0   | 170 | 0   | 0   | 0   | 9   | 0   | 9  |
| 6   | 382 | 0   | 0   | 58  | 4   | 0   | 18  | 0  |
| 0   | 12  | 5   | 0   | 0   | 2   | 0   | 12  | 11 |
| 0   | 0   | 12  | 10  | 0   | 0   | 0   | 0   | 0  |
| 0   | 0   | 3   | 4   | 2   | 0   | 25  | 0   | 3  |
| 12  | 4   | 0   | 0   | 4   | 2   | 0   | 3   | 0  |
| 44  | 59  | 20  | 0   | 20  | 22  | 3   | 14  | 18 |
| 5   | 4   | 18  | 9   | 2   | 7   | 10  | 5   | 15 |
| 0   | 0   | 22  | 0   | 0   | 0   | 64  | 0   | 78 |
| 11  | 15  | 37  | 61  | 25  | 0   | 0   | 4   | 3  |
| 0   | 0   | 13  | 17  | 0   | 0   | 80  | 0   | 62 |
| 0   | 16  | 0   | 0   | 26  | 17  | 0   | 0   | 0  |
| 0   | 21  | 2   | 0   | 12  | 29  | 0   | 0   | 0  |
| 4   | 99  | 0   | 0   | 0   | 0   | 0   | 0   | 0  |
| 3   | 3   | 0   | 11  | 0   | 6   | 0   | 0   | 0  |
| 2   | 0   | 3   | 0   | 0   | 0   | 5   | 9   | 14 |
| 0   | 12  | 0   | 0   | 0   | 0   | 0   | 0   | 0  |
| 3   | 0   | 13  | 18  | 0   | 0   | 48  | 61  | 12 |
| 4   | 0   | 20  | 50  | 0   | 0   | 32  | 34  | 44 |
| 7   | 0   | 22  | 10  | 0   | 2   | 22  | 29  | 17 |
| 8   | 14  | 21  | 34  | 10  | 3   | 5   | 18  | 15 |
| 0   | 38  | 5   | 0   | 0   | 10  | 0   | 0   | 0  |
| 326 | 3   | 21  | 2   | 0   | 3   | 7   | 26  | 37 |
| 0   | 15  | 96  | 0   | 119 | 473 | 6   | 0   | 17 |
| 7   | 0   | 0   | 0   | 9   | 6   | 0   | 0   | 0  |
| 0   | 0   | 0   | 0   | 75  | 0   | 0   | 0   | 0  |
| 9   | 27  | 44  | 12  | 4   | 16  | 6   | 2   | 4  |

|     |     |     |     |     |     |     |     |     |
|-----|-----|-----|-----|-----|-----|-----|-----|-----|
| 0   | 0   | 31  | 0   | 0   | 0   | 19  | 0   | 35  |
| 16  | 2   | 19  | 0   | 2   | 0   | 61  | 138 | 11  |
| 2   | 23  | 7   | 0   | 246 | 2   | 37  | 0   | 39  |
| 41  | 22  | 6   | 20  | 29  | 20  | 68  | 0   | 19  |
| 0   | 0   | 7   | 0   | 0   | 0   | 43  | 0   | 0   |
| 2   | 11  | 0   | 0   | 4   | 2   | 0   | 0   | 0   |
| 0   | 0   | 17  | 90  | 0   | 0   | 7   | 47  | 10  |
| 0   | 0   | 324 | 0   | 0   | 0   | 99  | 0   | 826 |
| 658 | 37  | 72  | 0   | 0   | 12  | 497 | 696 | 203 |
| 2   | 0   | 0   | 8   | 3   | 0   | 0   | 0   | 0   |
| 0   | 10  | 0   | 0   | 0   | 12  | 0   | 0   | 0   |
| 0   | 4   | 7   | 29  | 10  | 0   | 0   | 0   | 0   |
| 0   | 10  | 20  | 25  | 6   | 22  | 5   | 6   | 8   |
| 0   | 0   | 0   | 0   | 0   | 0   | 0   | 0   | 0   |
| 0   | 0   | 0   | 0   | 27  | 30  | 0   | 0   | 0   |
| 8   | 21  | 9   | 23  | 62  | 16  | 4   | 9   | 5   |
| 12  | 14  | 27  | 61  | 6   | 3   | 13  | 12  | 3   |
| 0   | 0   | 0   | 8   | 0   | 0   | 0   | 0   | 0   |
| 0   | 3   | 2   | 25  | 10  | 3   | 0   | 0   | 2   |
| 125 | 384 | 50  | 138 | 219 | 147 | 4   | 10  | 59  |
| 0   | 2   | 0   | 3   | 23  | 0   | 0   | 0   | 0   |
| 67  | 46  | 5   | 42  | 147 | 7   | 4   | 8   | 2   |
| 4   | 0   | 0   | 0   | 0   | 11  | 0   | 0   | 0   |
| 0   | 0   | 0   | 0   | 0   | 0   | 0   | 0   | 0   |
| 0   | 0   | 0   | 0   | 53  | 4   | 0   | 0   | 0   |
| 0   | 13  | 31  | 81  | 12  | 10  | 3   | 2   | 2   |
| 0   | 0   | 0   | 0   | 23  | 0   | 0   | 0   | 0   |
| 10  | 10  | 15  | 64  | 8   | 6   | 19  | 25  | 30  |
| 0   | 0   | 0   | 2   | 0   | 0   | 0   | 0   | 2   |
| 0   | 0   | 0   | 0   | 0   | 0   | 0   | 0   | 5   |
| 0   | 0   | 0   | 29  | 0   | 0   | 2   | 0   | 0   |
| 0   | 0   | 0   | 0   | 0   | 0   | 8   | 19  | 18  |
| 37  | 0   | 0   | 0   | 46  | 0   | 0   | 0   | 0   |
| 0   | 23  | 0   | 0   | 0   | 0   | 0   | 0   | 0   |
| 0   | 4   | 0   | 0   | 0   | 0   | 0   | 0   | 0   |
| 0   | 0   | 3   | 0   | 0   | 2   | 4   | 6   | 4   |
| 0   | 0   | 343 | 0   | 0   | 0   | 163 | 248 | 132 |
| 24  | 4   | 2   | 15  | 0   | 0   | 0   | 0   | 0   |
| 0   | 0   | 6   | 0   | 0   | 0   | 3   | 0   | 8   |
| 0   | 3   | 0   | 61  | 0   | 0   | 0   | 0   | 0   |
| 0   | 27  | 0   | 0   | 0   | 49  | 0   | 0   | 0   |
| 0   | 0   | 0   | 0   | 0   | 0   | 21  | 0   | 0   |
| 0   | 5   | 0   | 0   | 0   | 0   | 0   | 0   | 0   |
| 18  | 9   | 13  | 2   | 9   | 31  | 2   | 0   | 2   |
| 5   | 3   | 11  | 0   | 0   | 3   | 60  | 35  | 27  |
| 0   | 0   | 0   | 0   | 0   | 0   | 0   | 93  | 8   |
| 0   | 16  | 191 | 220 | 0   | 6   | 118 | 94  | 96  |
| 0   | 0   | 0   | 0   | 0   | 0   | 5   | 2   | 11  |
| 0   | 0   | 30  | 0   | 0   | 0   | 0   | 20  | 2   |
| 0   | 0   | 4   | 5   | 0   | 0   | 0   | 6   | 2   |

|     |      |     |     |     |     |      |      |      |
|-----|------|-----|-----|-----|-----|------|------|------|
| 6   | 14   | 4   | 10  | 0   | 44  | 5    | 11   | 5    |
| 0   | 5    | 0   | 0   | 0   | 0   | 0    | 0    | 0    |
| 6   | 20   | 0   | 0   | 0   | 4   | 0    | 0    | 0    |
| 0   | 407  | 0   | 0   | 0   | 0   | 0    | 0    | 0    |
| 0   | 18   | 69  | 0   | 0   | 0   | 8    | 37   | 61   |
| 6   | 2    | 31  | 2   | 0   | 0   | 50   | 36   | 16   |
| 0   | 0    | 4   | 21  | 0   | 0   | 0    | 5    | 0    |
| 24  | 0    | 0   | 0   | 0   | 0   | 0    | 0    | 0    |
| 0   | 0    | 0   | 4   | 0   | 0   | 0    | 5    | 4    |
| 45  | 187  | 87  | 41  | 234 | 45  | 2    | 0    | 14   |
| 0   | 5    | 0   | 0   | 7   | 15  | 0    | 0    | 0    |
| 5   | 28   | 3   | 0   | 3   | 0   | 0    | 0    | 5    |
| 423 | 75   | 3   | 19  | 0   | 0   | 0    | 0    | 0    |
| 41  | 0    | 5   | 21  | 0   | 46  | 2    | 0    | 0    |
| 0   | 0    | 3   | 3   | 5   | 15  | 0    | 0    | 0    |
| 0   | 0    | 2   | 0   | 0   | 0   | 323  | 0    | 0    |
| 0   | 0    | 67  | 0   | 0   | 0   | 10   | 0    | 2    |
| 2   | 0    | 0   | 0   | 0   | 0   | 0    | 0    | 0    |
| 2   | 40   | 586 | 196 | 23  | 29  | 1561 | 1450 | 1654 |
| 47  | 0    | 0   | 7   | 0   | 0   | 50   | 73   | 87   |
| 18  | 4    | 4   | 7   | 6   | 20  | 0    | 0    | 5    |
| 8   | 21   | 6   | 0   | 2   | 7   | 0    | 0    | 2    |
| 306 | 15   | 106 | 85  | 131 | 18  | 18   | 77   | 93   |
| 4   | 0    | 4   | 0   | 4   | 667 | 0    | 0    | 0    |
| 0   | 0    | 17  | 0   | 0   | 0   | 22   | 30   | 12   |
| 28  | 30   | 31  | 44  | 8   | 2   | 25   | 20   | 11   |
| 0   | 0    | 11  | 2   | 0   | 0   | 23   | 0    | 0    |
| 40  | 6    | 255 | 131 | 0   | 0   | 385  | 191  | 293  |
| 11  | 7    | 2   | 20  | 0   | 0   | 0    | 0    | 0    |
| 21  | 134  | 703 | 83  | 12  | 113 | 140  | 221  | 96   |
| 20  | 234  | 4   | 0   | 2   | 3   | 5    | 0    | 0    |
| 0   | 0    | 118 | 0   | 5   | 4   | 76   | 0    | 61   |
| 45  | 6    | 5   | 0   | 0   | 0   | 0    | 0    | 0    |
| 0   | 0    | 75  | 0   | 0   | 0   | 262  | 24   | 23   |
| 0   | 0    | 0   | 44  | 0   | 0   | 0    | 0    | 0    |
| 19  | 34   | 0   | 8   | 0   | 0   | 0    | 0    | 0    |
| 239 | 12   | 0   | 0   | 0   | 0   | 0    | 0    | 0    |
| 0   | 3809 | 0   | 0   | 0   | 0   | 0    | 0    | 0    |
| 0   | 17   | 6   | 0   | 0   | 0   | 46   | 0    | 0    |
| 0   | 9    | 39  | 4   | 13  | 13  | 24   | 71   | 21   |
| 21  | 2    | 0   | 0   | 0   | 2   | 11   | 0    | 3    |
| 207 | 42   | 106 | 353 | 23  | 29  | 280  | 98   | 132  |
| 0   | 0    | 16  | 0   | 0   | 0   | 0    | 0    | 0    |
| 13  | 39   | 17  | 66  | 284 | 64  | 31   | 9    | 29   |
| 0   | 185  | 78  | 461 | 0   | 0   | 0    | 2    | 88   |
| 0   | 0    | 5   | 0   | 0   | 0   | 15   | 3    | 0    |
| 0   | 3    | 0   | 9   | 0   | 0   | 4    | 16   | 5    |
| 0   | 7    | 11  | 0   | 5   | 5   | 9    | 2    | 0    |
| 3   | 6    | 9   | 0   | 3   | 10  | 3    | 2    | 4    |
| 0   | 2    | 48  | 33  | 0   | 0   | 93   | 89   | 128  |



|     |    |     |     |      |    |      |     |      |
|-----|----|-----|-----|------|----|------|-----|------|
| 0   | 60 | 12  | 8   | 0    | 0  | 0    | 8   | 0    |
| 0   | 0  | 0   | 0   | 0    | 0  | 0    | 0   | 0    |
| 0   | 3  | 0   | 0   | 0    | 0  | 7    | 5   | 5    |
| 3   | 6  | 25  | 0   | 5    | 5  | 76   | 0   | 0    |
| 3   | 5  | 86  | 234 | 2    | 6  | 404  | 148 | 236  |
| 0   | 16 | 0   | 0   | 0    | 0  | 0    | 0   | 0    |
| 0   | 0  | 14  | 0   | 0    | 0  | 3    | 0   | 0    |
| 38  | 63 | 78  | 166 | 108  | 67 | 34   | 36  | 35   |
| 0   | 0  | 0   | 0   | 0    | 0  | 0    | 0   | 0    |
| 0   | 12 | 0   | 0   | 0    | 0  | 0    | 0   | 0    |
| 0   | 13 | 2   | 0   | 1215 | 7  | 0    | 0   | 0    |
| 0   | 6  | 0   | 2   | 13   | 0  | 0    | 0   | 0    |
| 2   | 38 | 342 | 2   | 0    | 3  | 3    | 0   | 6    |
| 0   | 0  | 6   | 0   | 0    | 3  | 0    | 0   | 0    |
| 2   | 8  | 0   | 0   | 99   | 9  | 0    | 0   | 0    |
| 197 | 94 | 217 | 699 | 198  | 76 | 1041 | 279 | 151  |
| 0   | 2  | 8   | 0   | 0    | 0  | 0    | 2   | 0    |
| 0   | 13 | 2   | 0   | 5    | 0  | 2    | 0   | 0    |
| 39  | 0  | 0   | 0   | 0    | 0  | 0    | 0   | 0    |
| 5   | 3  | 6   | 8   | 16   | 5  | 12   | 6   | 13   |
| 6   | 5  | 116 | 272 | 15   | 2  | 149  | 295 | 130  |
| 35  | 35 | 14  | 0   | 136  | 85 | 16   | 25  | 32   |
| 14  | 12 | 20  | 0   | 54   | 15 | 15   | 17  | 7    |
| 0   | 18 | 24  | 0   | 0    | 17 | 0    | 5   | 23   |
| 0   | 51 | 0   | 0   | 0    | 0  | 0    | 0   | 0    |
| 0   | 0  | 79  | 149 | 5    | 0  | 28   | 0   | 19   |
| 6   | 10 | 2   | 0   | 4    | 7  | 0    | 2   | 0    |
| 311 | 66 | 84  | 327 | 0    | 22 | 13   | 148 | 16   |
| 14  | 5  | 0   | 0   | 75   | 19 | 0    | 0   | 0    |
| 9   | 68 | 0   | 10  | 7    | 24 | 0    | 0   | 2    |
| 19  | 69 | 0   | 5   | 151  | 87 | 2    | 2   | 0    |
| 8   | 0  | 0   | 0   | 0    | 2  | 0    | 0   | 0    |
| 0   | 5  | 0   | 17  | 0    | 0  | 9    | 0   | 9    |
| 0   | 0  | 89  | 0   | 0    | 0  | 275  | 0   | 108  |
| 0   | 8  | 0   | 0   | 9    | 0  | 0    | 0   | 0    |
| 0   | 31 | 0   | 0   | 0    | 0  | 0    | 3   | 0    |
| 0   | 15 | 0   | 0   | 0    | 0  | 0    | 0   | 0    |
| 0   | 4  | 0   | 0   | 3    | 2  | 0    | 0   | 21   |
| 52  | 3  | 10  | 184 | 0    | 11 | 399  | 30  | 46   |
| 0   | 0  | 86  | 0   | 0    | 0  | 159  | 21  | 163  |
| 0   | 0  | 23  | 0   | 0    | 0  | 2100 | 0   | 2529 |
| 5   | 0  | 36  | 76  | 0    | 2  | 0    | 24  | 13   |
| 70  | 0  | 0   | 0   | 0    | 2  | 0    | 247 | 0    |
| 8   | 41 | 3   | 0   | 3    | 13 | 6    | 5   | 16   |
| 0   | 17 | 0   | 0   | 0    | 0  | 0    | 0   | 0    |
| 2   | 0  | 80  | 11  | 0    | 0  | 0    | 0   | 36   |
| 17  | 22 | 0   | 18  | 0    | 2  | 0    | 0   | 12   |
| 5   | 16 | 2   | 0   | 0    | 3  | 0    | 24  | 0    |
| 126 | 50 | 42  | 5   | 465  | 25 | 27   | 5   | 4    |
| 0   | 0  | 33  | 41  | 0    | 0  | 42   | 37  | 17   |

|             |             |             |             |             |             |             |             |             |
|-------------|-------------|-------------|-------------|-------------|-------------|-------------|-------------|-------------|
| 0           | 0           | 66          | 69          | 0           | 0           | 139         | 70          | 82          |
| 17          | 0           | 3           | 2           | 0           | 42          | 0           | 0           | 0           |
| 12          | 16          | 15          | 3           | 56          | 9           | 3           | 0           | 2           |
| 0           | 83          | 0           | 0           | 0           | 0           | 2           | 0           | 10          |
| 22          | 0           | 0           | 0           | 155         | 49          | 0           | 0           | 0           |
| 55          | 34          | 74          | 164         | 8           | 19          | 133         | 276         | 118         |
| 52          | 32          | 99          | 5           | 7           | 37          | 247         | 492         | 196         |
| 0           | 21          | 128         | 6           | 0           | 207         | 14          | 35          | 36          |
| 200         | 16          | 0           | 5           | 0           | 0           | 6           | 240         | 3           |
| 38          | 2           | 5           | 7           | 126         | 0           | 0           | 0           | 0           |
| 2           | 43          | 9           | 0           | 4           | 98          | 3           | 3           | 26          |
| 177         | 0           | 2           | 26          | 244         | 40          | 2           | 6           | 3           |
| 0           | 0           | 173         | 472         | 6           | 0           | 395         | 1258        | 489         |
| 5           | 26          | 77          | 58          | 46          | 23          | 19          | 52          | 50          |
| 0           | 30          | 0           | 0           | 9           | 0           | 0           | 0           | 0           |
| 2           | 11          | 2           | 5           | 52          | 32          | 0           | 4           | 0           |
| 0           | 0           | 91          | 0           | 0           | 0           | 17          | 0           | 0           |
| 0           | 0           | 324         | 0           | 0           | 0           | 0           | 0           | 0           |
| 199         | 0           | 49          | 6           | 27          | 11          | 7           | 4           | 44          |
| 0           | 0           | 43          | 86          | 0           | 0           | 16          | 0           | 4           |
| 0           | 75          | 0           | 0           | 0           | 0           | 7           | 22          | 5           |
| 7           | 4           | 3           | 6           | 0           | 0           | 8           | 0           | 5           |
| 0           | 0           | 0           | 0           | 0           | 0           | 0           | 0           | 49          |
| 18          | 0           | 0           | 13          | 280         | 0           | 0           | 0           | 0           |
| 16          | 10          | 2           | 0           | 0           | 0           | 2           | 0           | 0           |
| 24          | 110         | 135         | 187         | 82          | 114         | 12          | 12          | 23          |
| 0           | 0           | 0           | 228         | 38          | 4           | 0           | 0           | 5           |
| 0           | 0           | 7           | 0           | 0           | 0           | 0           | 0           | 14          |
| 0           | 5           | 0           | 0           | 0           | 0           | 0           | 0           | 0           |
| 7           | 3           | 11          | 25          | 0           | 0           | 123         | 13          | 29          |
| 32          | 4           | 9           | 15          | 138         | 194         | 37          | 26          | 9           |
| 0           | 0           | 2           | 358         | 0           | 0           | 0           | 2           | 0           |
| 9           | 9           | 5           | 3           | 11          | 32          | 0           | 3           | 2           |
| 0           | 0           | 0           | 0           | 0           | 0           | 0           | 0           | 0           |
| <b>3488</b> | <b>6813</b> | <b>5411</b> | <b>5647</b> | <b>4647</b> | <b>2539</b> | <b>9492</b> | <b>6353</b> | <b>7702</b> |



|     |     |     |     |     |     |     |     |      |
|-----|-----|-----|-----|-----|-----|-----|-----|------|
| 0   | 0   | 0   | 44  | 0   | 56  | 125 | 0   | 0    |
| 0   | 15  | 0   | 9   | 0   | 62  | 10  | 6   | 8    |
| 17  | 26  | 103 | 82  | 21  | 17  | 103 | 25  | 189  |
| 145 | 7   | 96  | 6   | 67  | 9   | 3   | 6   | 292  |
| 21  | 0   | 0   | 0   | 11  | 0   | 2   | 0   | 7    |
| 63  | 18  | 704 | 108 | 208 | 147 | 57  | 87  | 74   |
| 18  | 3   | 24  | 9   | 24  | 27  | 4   | 60  | 61   |
| 2   | 0   | 218 | 0   | 57  | 0   | 0   | 0   | 7    |
| 3   | 0   | 2   | 117 | 0   | 0   | 42  | 0   | 11   |
| 14  | 0   | 0   | 0   | 377 | 23  | 0   | 0   | 0    |
| 0   | 0   | 81  | 4   | 0   | 120 | 0   | 35  | 0    |
| 0   | 0   | 0   | 0   | 0   | 0   | 0   | 0   | 0    |
| 0   | 0   | 0   | 20  | 0   | 0   | 43  | 0   | 0    |
| 9   | 6   | 15  | 3   | 23  | 42  | 2   | 18  | 18   |
| 55  | 11  | 2   | 0   | 5   | 0   | 0   | 9   | 2    |
| 61  | 0   | 0   | 0   | 41  | 0   | 0   | 0   | 0    |
| 0   | 226 | 0   | 51  | 29  | 36  | 30  | 6   | 364  |
| 2   | 2   | 0   | 0   | 0   | 5   | 0   | 0   | 3    |
| 2   | 9   | 24  | 0   | 0   | 0   | 0   | 0   | 0    |
| 5   | 30  | 297 | 0   | 10  | 5   | 4   | 12  | 16   |
| 12  | 6   | 0   | 35  | 32  | 10  | 19  | 159 | 7    |
| 8   | 111 | 0   | 0   | 39  | 79  | 0   | 161 | 10   |
| 0   | 0   | 0   | 0   | 2   | 18  | 4   | 2   | 57   |
| 0   | 0   | 0   | 15  | 0   | 0   | 32  | 0   | 0    |
| 620 | 0   | 0   | 0   | 348 | 6   | 0   | 0   | 16   |
| 0   | 0   | 0   | 13  | 0   | 37  | 3   | 0   | 0    |
| 0   | 0   | 0   | 2   | 7   | 0   | 0   | 0   | 0    |
| 0   | 0   | 0   | 0   | 0   | 14  | 3   | 0   | 0    |
| 11  | 15  | 0   | 4   | 7   | 2   | 0   | 0   | 9    |
| 159 | 0   | 0   | 3   | 193 | 0   | 3   | 0   | 0    |
| 5   | 10  | 0   | 10  | 34  | 2   | 6   | 0   | 20   |
| 0   | 0   | 0   | 57  | 0   | 0   | 121 | 0   | 0    |
| 136 | 0   | 0   | 4   | 81  | 39  | 6   | 0   | 8    |
| 0   | 0   | 0   | 25  | 0   | 0   | 133 | 0   | 0    |
| 17  | 0   | 0   | 0   | 10  | 6   | 2   | 0   | 63   |
| 6   | 0   | 6   | 0   | 9   | 21  | 0   | 0   | 0    |
| 104 | 0   | 0   | 0   | 6   | 0   | 0   | 0   | 0    |
| 2   | 0   | 0   | 0   | 2   | 0   | 0   | 0   | 25   |
| 5   | 22  | 0   | 6   | 14  | 0   | 0   | 2   | 32   |
| 17  | 0   | 0   | 0   | 15  | 0   | 0   | 0   | 41   |
| 0   | 52  | 292 | 15  | 2   | 15  | 0   | 18  | 27   |
| 0   | 20  | 16  | 18  | 2   | 16  | 20  | 15  | 0    |
| 8   | 8   | 15  | 28  | 14  | 66  | 3   | 51  | 10   |
| 3   | 7   | 48  | 6   | 36  | 25  | 0   | 4   | 10   |
| 61  | 0   | 0   | 0   | 0   | 0   | 0   | 0   | 27   |
| 13  | 23  | 16  | 53  | 10  | 0   | 26  | 2   | 21   |
| 621 | 0   | 0   | 0   | 22  | 0   | 3   | 0   | 1455 |
| 4   | 0   | 0   | 2   | 32  | 0   | 0   | 0   | 2    |
| 0   | 0   | 0   | 0   | 2   | 2   | 0   | 2   | 2    |
| 59  | 4   | 24  | 15  | 19  | 28  | 0   | 10  | 111  |

|     |    |     |     |     |     |     |     |     |
|-----|----|-----|-----|-----|-----|-----|-----|-----|
| 0   | 0  | 0   | 39  | 0   | 0   | 22  | 0   | 0   |
| 2   | 16 | 13  | 31  | 4   | 15  | 13  | 8   | 20  |
| 2   | 0  | 0   | 39  | 33  | 13  | 62  | 4   | 3   |
| 5   | 11 | 4   | 9   | 39  | 11  | 2   | 4   | 60  |
| 0   | 0  | 0   | 8   | 0   | 0   | 80  | 0   | 0   |
| 2   | 0  | 0   | 0   | 6   | 0   | 0   | 5   | 32  |
| 0   | 0  | 0   | 8   | 0   | 0   | 11  | 0   | 0   |
| 4   | 0  | 0   | 326 | 0   | 0   | 81  | 0   | 0   |
| 424 | 0  | 0   | 201 | 269 | 0   | 84  | 0   | 164 |
| 0   | 0  | 0   | 0   | 4   | 7   | 0   | 0   | 0   |
| 17  | 0  | 0   | 0   | 6   | 2   | 0   | 0   | 0   |
| 0   | 0  | 0   | 7   | 10  | 19  | 0   | 0   | 0   |
| 11  | 0  | 20  | 8   | 9   | 9   | 6   | 4   | 23  |
| 0   | 0  | 0   | 0   | 0   | 0   | 0   | 0   | 0   |
| 0   | 0  | 0   | 0   | 4   | 0   | 0   | 0   | 2   |
| 13  | 3  | 0   | 3   | 16  | 18  | 0   | 14  | 45  |
| 5   | 4  | 37  | 8   | 28  | 26  | 4   | 18  | 66  |
| 0   | 0  | 0   | 0   | 0   | 3   | 0   | 2   | 0   |
| 5   | 0  | 12  | 0   | 3   | 36  | 2   | 0   | 20  |
| 228 | 17 | 41  | 47  | 402 | 120 | 4   | 95  | 323 |
| 0   | 0  | 0   | 0   | 0   | 0   | 0   | 0   | 0   |
| 58  | 2  | 33  | 10  | 38  | 27  | 2   | 20  | 28  |
| 120 | 0  | 0   | 2   | 61  | 0   | 2   | 7   | 0   |
| 0   | 0  | 0   | 0   | 0   | 0   | 0   | 0   | 0   |
| 2   | 0  | 0   | 0   | 13  | 0   | 0   | 0   | 6   |
| 6   | 23 | 147 | 12  | 21  | 2   | 5   | 39  | 22  |
| 0   | 0  | 0   | 0   | 0   | 0   | 0   | 0   | 0   |
| 9   | 0  | 48  | 23  | 30  | 45  | 7   | 17  | 29  |
| 0   | 0  | 0   | 0   | 0   | 0   | 0   | 0   | 22  |
| 0   | 0  | 0   | 0   | 0   | 9   | 2   | 2   | 0   |
| 2   | 51 | 0   | 0   | 0   | 0   | 2   | 0   | 2   |
| 0   | 0  | 0   | 6   | 0   | 0   | 11  | 0   | 0   |
| 19  | 0  | 0   | 0   | 2   | 2   | 0   | 0   | 0   |
| 0   | 0  | 0   | 0   | 0   | 0   | 6   | 0   | 0   |
| 0   | 0  | 0   | 0   | 0   | 0   | 0   | 0   | 0   |
| 0   | 0  | 72  | 5   | 2   | 10  | 0   | 0   | 3   |
| 0   | 0  | 0   | 118 | 0   | 96  | 207 | 0   | 0   |
| 0   | 0  | 0   | 0   | 21  | 0   | 0   | 0   | 0   |
| 0   | 0  | 0   | 15  | 0   | 2   | 18  | 0   | 0   |
| 0   | 0  | 2   | 0   | 0   | 0   | 0   | 0   | 0   |
| 78  | 0  | 0   | 0   | 2   | 0   | 0   | 0   | 0   |
| 0   | 0  | 0   | 27  | 0   | 0   | 44  | 0   | 0   |
| 0   | 0  | 0   | 0   | 0   | 0   | 0   | 0   | 0   |
| 31  | 11 | 0   | 2   | 56  | 8   | 5   | 0   | 22  |
| 5   | 0  | 97  | 20  | 2   | 2   | 19  | 20  | 12  |
| 0   | 0  | 0   | 2   | 0   | 3   | 0   | 0   | 0   |
| 0   | 0  | 71  | 74  | 2   | 339 | 42  | 126 | 0   |
| 0   | 0  | 0   | 0   | 0   | 0   | 0   | 0   | 0   |
| 0   | 0  | 0   | 0   | 0   | 0   | 8   | 0   | 0   |
| 0   | 0  | 0   | 0   | 5   | 2   | 4   | 5   | 0   |

|     |     |      |     |     |     |     |     |      |
|-----|-----|------|-----|-----|-----|-----|-----|------|
| 40  | 3   | 15   | 7   | 14  | 2   | 0   | 3   | 74   |
| 0   | 0   | 0    | 0   | 155 | 0   | 0   | 0   | 663  |
| 6   | 6   | 0    | 0   | 0   | 0   | 0   | 0   | 7    |
| 129 | 0   | 0    | 0   | 0   | 0   | 0   | 0   | 1194 |
| 0   | 0   | 0    | 4   | 0   | 2   | 41  | 0   | 0    |
| 4   | 0   | 5    | 17  | 10  | 36  | 5   | 23  | 48   |
| 0   | 0   | 36   | 2   | 0   | 7   | 0   | 0   | 0    |
| 12  | 0   | 0    | 0   | 22  | 0   | 0   | 0   | 26   |
| 0   | 0   | 0    | 0   | 0   | 13  | 0   | 0   | 0    |
| 60  | 39  | 1199 | 0   | 255 | 7   | 0   | 87  | 222  |
| 4   | 0   | 0    | 0   | 12  | 0   | 0   | 0   | 27   |
| 4   | 0   | 0    | 18  | 19  | 0   | 3   | 0   | 0    |
| 768 | 0   | 0    | 0   | 2   | 0   | 0   | 0   | 0    |
| 56  | 0   | 0    | 6   | 69  | 0   | 0   | 0   | 9    |
| 13  | 7   | 0    | 0   | 7   | 0   | 0   | 0   | 0    |
| 0   | 0   | 0    | 214 | 0   | 0   | 308 | 0   | 0    |
| 0   | 0   | 0    | 33  | 0   | 0   | 38  | 0   | 0    |
| 0   | 0   | 0    | 0   | 0   | 0   | 0   | 0   | 0    |
| 9   | 313 | 4    | 889 | 52  | 335 | 510 | 550 | 50   |
| 25  | 0   | 0    | 80  | 0   | 0   | 68  | 0   | 0    |
| 5   | 2   | 0    | 6   | 4   | 43  | 0   | 0   | 0    |
| 60  | 0   | 5    | 3   | 38  | 19  | 0   | 0   | 14   |
| 7   | 13  | 15   | 119 | 79  | 389 | 481 | 178 | 30   |
| 40  | 0   | 0    | 0   | 0   | 4   | 0   | 18  | 0    |
| 0   | 0   | 0    | 0   | 0   | 0   | 15  | 0   | 0    |
| 56  | 9   | 69   | 28  | 55  | 21  | 6   | 45  | 28   |
| 0   | 8   | 26   | 4   | 0   | 4   | 15  | 2   | 7    |
| 14  | 4   | 0    | 285 | 43  | 40  | 170 | 37  | 46   |
| 31  | 3   | 0    | 0   | 0   | 166 | 0   | 0   | 303  |
| 98  | 28  | 40   | 91  | 78  | 91  | 40  | 19  | 303  |
| 255 | 0   | 0    | 0   | 134 | 2   | 0   | 0   | 248  |
| 0   | 0   | 0    | 85  | 0   | 0   | 23  | 0   | 0    |
| 0   | 0   | 0    | 0   | 522 | 0   | 3   | 0   | 90   |
| 0   | 0   | 0    | 164 | 0   | 0   | 141 | 0   | 0    |
| 0   | 0   | 0    | 0   | 0   | 0   | 0   | 0   | 0    |
| 107 | 3   | 0    | 0   | 0   | 76  | 0   | 0   | 137  |
| 17  | 0   | 0    | 2   | 113 | 0   | 0   | 0   | 0    |
| 115 | 0   | 0    | 2   | 0   | 0   | 0   | 0   | 0    |
| 0   | 0   | 211  | 19  | 0   | 0   | 0   | 0   | 0    |
| 0   | 15  | 0    | 34  | 57  | 114 | 34  | 0   | 2    |
| 8   | 26  | 0    | 5   | 2   | 2   | 0   | 13  | 58   |
| 50  | 134 | 0    | 191 | 162 | 221 | 75  | 154 | 253  |
| 0   | 19  | 0    | 4   | 0   | 0   | 0   | 0   | 0    |
| 9   | 66  | 5    | 14  | 112 | 23  | 3   | 41  | 0    |
| 0   | 0   | 0    | 26  | 0   | 0   | 11  | 62  | 369  |
| 0   | 0   | 0    | 9   | 0   | 0   | 0   | 0   | 0    |
| 0   | 0   | 0    | 0   | 0   | 10  | 3   | 0   | 0    |
| 8   | 24  | 0    | 0   | 2   | 0   | 0   | 0   | 20   |
| 26  | 0   | 0    | 0   | 8   | 69  | 2   | 0   | 6    |
| 0   | 22  | 136  | 83  | 0   | 194 | 38  | 17  | 0    |

|     |     |     |      |     |     |     |     |     |
|-----|-----|-----|------|-----|-----|-----|-----|-----|
| 0   | 0   | 0   | 0    | 0   | 0   | 0   | 0   | 0   |
| 0   | 0   | 0   | 0    | 0   | 0   | 0   | 0   | 0   |
| 0   | 0   | 0   | 13   | 0   | 0   | 20  | 0   | 4   |
| 15  | 34  | 0   | 5    | 6   | 28  | 33  | 26  | 23  |
| 5   | 206 | 9   | 110  | 12  | 96  | 67  | 5   | 53  |
| 618 | 0   | 0   | 0    | 11  | 0   | 0   | 0   | 0   |
| 0   | 0   | 0   | 0    | 0   | 0   | 0   | 0   | 0   |
| 101 | 71  | 63  | 31   | 135 | 110 | 8   | 121 | 126 |
| 0   | 0   | 0   | 0    | 3   | 0   | 0   | 0   | 0   |
| 60  | 0   | 0   | 0    | 0   | 0   | 0   | 0   | 0   |
| 5   | 98  | 0   | 0    | 164 | 0   | 0   | 54  | 25  |
| 0   | 0   | 0   | 6    | 103 | 0   | 0   | 0   | 11  |
| 24  | 0   | 0   | 2    | 0   | 0   | 0   | 0   | 100 |
| 19  | 0   | 233 | 0    | 4   | 29  | 0   | 5   | 0   |
| 0   | 14  | 0   | 0    | 6   | 0   | 0   | 0   | 0   |
| 50  | 180 | 723 | 337  | 373 | 221 | 137 | 115 | 482 |
| 0   | 0   | 0   | 0    | 0   | 0   | 0   | 0   | 0   |
| 15  | 0   | 0   | 0    | 59  | 0   | 0   | 0   | 0   |
| 0   | 0   | 0   | 0    | 0   | 336 | 0   | 0   | 216 |
| 0   | 6   | 0   | 4    | 6   | 0   | 2   | 13  | 19  |
| 4   | 192 | 127 | 61   | 35  | 384 | 114 | 81  | 58  |
| 663 | 2   | 17  | 9    | 215 | 156 | 30  | 0   | 15  |
| 9   | 25  | 0   | 17   | 15  | 227 | 5   | 3   | 11  |
| 16  | 8   | 0   | 9    | 43  | 7   | 0   | 0   | 31  |
| 154 | 0   | 0   | 0    | 51  | 0   | 0   | 0   | 0   |
| 0   | 10  | 0   | 15   | 0   | 0   | 35  | 0   | 0   |
| 7   | 0   | 0   | 0    | 9   | 0   | 0   | 0   | 5   |
| 645 | 522 | 0   | 134  | 965 | 550 | 228 | 0   | 7   |
| 13  | 16  | 0   | 0    | 28  | 0   | 0   | 0   | 0   |
| 157 | 0   | 0   | 0    | 146 | 0   | 0   | 8   | 225 |
| 217 | 15  | 0   | 2    | 28  | 21  | 0   | 0   | 27  |
| 16  | 0   | 0   | 0    | 14  | 0   | 0   | 0   | 2   |
| 0   | 0   | 0   | 0    | 0   | 0   | 18  | 0   | 0   |
| 0   | 0   | 0   | 36   | 0   | 0   | 352 | 0   | 0   |
| 4   | 0   | 0   | 0    | 0   | 0   | 0   | 0   | 0   |
| 0   | 0   | 0   | 0    | 0   | 0   | 0   | 0   | 547 |
| 0   | 0   | 0   | 0    | 0   | 0   | 0   | 0   | 0   |
| 8   | 0   | 0   | 0    | 39  | 6   | 0   | 0   | 3   |
| 15  | 0   | 0   | 119  | 7   | 10  | 433 | 0   | 11  |
| 0   | 0   | 0   | 194  | 0   | 0   | 348 | 0   | 0   |
| 0   | 0   | 0   | 2056 | 0   | 0   | 0   | 0   | 0   |
| 0   | 0   | 0   | 9    | 79  | 34  | 26  | 0   | 0   |
| 0   | 0   | 0   | 0    | 0   | 0   | 0   | 0   | 0   |
| 84  | 97  | 3   | 2    | 19  | 5   | 3   | 3   | 33  |
| 0   | 0   | 0   | 0    | 0   | 0   | 0   | 0   | 0   |
| 2   | 0   | 0   | 0    | 37  | 91  | 9   | 0   | 7   |
| 5   | 21  | 0   | 0    | 18  | 94  | 0   | 0   | 68  |
| 316 | 0   | 0   | 4    | 121 | 0   | 31  | 0   | 0   |
| 57  | 54  | 8   | 8    | 433 | 9   | 6   | 148 | 56  |
| 0   | 0   | 0   | 39   | 0   | 29  | 42  | 0   | 0   |

|             |             |             |             |             |             |             |             |             |
|-------------|-------------|-------------|-------------|-------------|-------------|-------------|-------------|-------------|
| 0           | 0           | 0           | 128         | 0           | 80          | 65          | 17          | 0           |
| 439         | 0           | 0           | 2           | 194         | 0           | 2           | 9           | 0           |
| 9           | 0           | 0           | 0           | 35          | 15          | 0           | 4           | 0           |
| 0           | 0           | 0           | 0           | 108         | 0           | 23          | 0           | 60          |
| 42          | 0           | 0           | 0           | 309         | 0           | 0           | 0           | 0           |
| 14          | 71          | 585         | 80          | 40          | 75          | 38          | 136         | 120         |
| 21          | 0           | 0           | 120         | 48          | 10          | 93          | 76          | 41          |
| 65          | 0           | 73          | 36          | 3           | 14          | 15          | 45          | 45          |
| 59          | 0           | 0           | 0           | 90          | 0           | 0           | 311         | 3           |
| 11          | 16          | 0           | 0           | 54          | 25          | 2           | 0           | 129         |
| 204         | 0           | 7           | 9           | 26          | 0           | 2           | 0           | 52          |
| 3           | 3           | 8           | 2           | 68          | 113         | 2           | 98          | 4           |
| 3           | 75          | 1041        | 269         | 0           | 268         | 162         | 238         | 0           |
| 6           | 0           | 85          | 62          | 23          | 377         | 52          | 13          | 40          |
| 0           | 0           | 0           | 0           | 0           | 0           | 0           | 0           | 98          |
| 40          | 0           | 146         | 0           | 122         | 0           | 0           | 14          | 0           |
| 0           | 0           | 0           | 0           | 0           | 3           | 9           | 0           | 0           |
| 0           | 0           | 0           | 269         | 0           | 0           | 0           | 0           | 0           |
| 18          | 11          | 25          | 17          | 29          | 4           | 48          | 0           | 19          |
| 0           | 0           | 41          | 0           | 0           | 0           | 9           | 62          | 0           |
| 318         | 0           | 0           | 0           | 0           | 0           | 24          | 0           | 262         |
| 2           | 0           | 4           | 9           | 18          | 5           | 2           | 12          | 0           |
| 2           | 0           | 0           | 0           | 51          | 0           | 0           | 0           | 0           |
| 300         | 0           | 0           | 0           | 0           | 439         | 13          | 151         | 0           |
| 72          | 0           | 0           | 6           | 0           | 0           | 0           | 2           | 3           |
| 240         | 27          | 50          | 41          | 90          | 87          | 5           | 79          | 248         |
| 0           | 13          | 55          | 0           | 12          | 0           | 0           | 8           | 0           |
| 0           | 0           | 0           | 0           | 0           | 3           | 0           | 0           | 0           |
| 0           | 0           | 0           | 0           | 0           | 0           | 0           | 0           | 0           |
| 7           | 0           | 258         | 13          | 0           | 12          | 31          | 25          | 3           |
| 2           | 0           | 0           | 2           | 33          | 0           | 100         | 0           | 2           |
| 0           | 0           | 0           | 0           | 0           | 11          | 0           | 0           | 0           |
| 29          | 2           | 3           | 0           | 41          | 2           | 0           | 0           | 15          |
| 0           | 0           | 0           | 0           | 0           | 0           | 0           | 0           | 0           |
| <b>7200</b> | <b>2524</b> | <b>5315</b> | <b>6724</b> | <b>6435</b> | <b>5874</b> | <b>4677</b> | <b>3128</b> | <b>6799</b> |





|     |     |     |    |     |     |     |     |     |
|-----|-----|-----|----|-----|-----|-----|-----|-----|
| 0   | 78  | 0   | 25 | 0   | 0   | 0   | 35  | 0   |
| 0   | 31  | 7   | 3  | 0   | 0   | 0   | 52  | 0   |
| 0   | 97  | 90  | 15 | 43  | 27  | 4   | 164 | 10  |
| 85  | 244 | 24  | 0  | 223 | 109 | 30  | 18  | 157 |
| 4   | 0   | 2   | 6  | 2   | 23  | 18  | 0   | 4   |
| 7   | 205 | 172 | 87 | 141 | 0   | 68  | 131 | 79  |
| 3   | 28  | 31  | 17 | 34  | 0   | 33  | 6   | 54  |
| 0   | 0   | 0   | 0  | 0   | 17  | 48  | 97  | 159 |
| 18  | 7   | 0   | 33 | 0   | 5   | 0   | 3   | 0   |
| 4   | 2   | 0   | 0  | 79  | 0   | 0   | 13  | 0   |
| 5   | 0   | 4   | 0  | 0   | 0   | 0   | 0   | 0   |
| 0   | 0   | 0   | 0  | 0   | 0   | 0   | 0   | 0   |
| 0   | 0   | 0   | 20 | 0   | 0   | 0   | 0   | 0   |
| 0   | 25  | 26  | 30 | 20  | 2   | 6   | 8   | 70  |
| 3   | 2   | 0   | 0  | 0   | 9   | 41  | 4   | 8   |
| 4   | 0   | 0   | 0  | 0   | 11  | 0   | 0   | 8   |
| 0   | 220 | 28  | 18 | 0   | 0   | 0   | 65  | 0   |
| 11  | 0   | 0   | 0  | 2   | 0   | 132 | 0   | 12  |
| 3   | 0   | 0   | 0  | 0   | 0   | 125 | 0   | 11  |
| 0   | 15  | 14  | 2  | 0   | 0   | 3   | 13  | 16  |
| 0   | 5   | 18  | 21 | 17  | 0   | 39  | 8   | 125 |
| 23  | 0   | 22  | 0  | 26  | 11  | 26  | 11  | 16  |
| 12  | 0   | 0   | 0  | 64  | 17  | 3   | 0   | 9   |
| 0   | 7   | 0   | 0  | 0   | 0   | 0   | 0   | 0   |
| 21  | 4   | 4   | 0  | 0   | 86  | 29  | 0   | 13  |
| 0   | 164 | 14  | 34 | 0   | 0   | 0   | 55  | 0   |
| 0   | 0   | 0   | 23 | 6   | 0   | 0   | 4   | 6   |
| 0   | 3   | 0   | 0  | 0   | 0   | 0   | 0   | 0   |
| 7   | 0   | 0   | 0  | 3   | 2   | 20  | 10  | 0   |
| 14  | 4   | 56  | 4  | 17  | 25  | 0   | 0   | 36  |
| 2   | 38  | 4   | 0  | 55  | 14  | 2   | 5   | 11  |
| 0   | 0   | 0   | 36 | 0   | 0   | 0   | 0   | 0   |
| 11  | 0   | 19  | 5  | 56  | 0   | 0   | 23  | 9   |
| 0   | 0   | 0   | 7  | 0   | 0   | 0   | 0   | 0   |
| 32  | 0   | 6   | 0  | 0   | 20  | 26  | 5   | 3   |
| 21  | 0   | 0   | 0  | 0   | 19  | 15  | 0   | 46  |
| 124 | 10  | 0   | 0  | 0   | 0   | 0   | 0   | 6   |
| 10  | 0   | 123 | 0  | 50  | 0   | 4   | 2   | 0   |
| 0   | 8   | 13  | 0  | 0   | 0   | 0   | 2   | 0   |
| 15  | 123 | 11  | 0  | 0   | 14  | 0   | 2   | 0   |
| 0   | 8   | 47  | 19 | 0   | 0   | 4   | 25  | 0   |
| 0   | 22  | 22  | 25 | 6   | 0   | 26  | 12  | 14  |
| 0   | 12  | 43  | 9  | 10  | 2   | 10  | 0   | 0   |
| 6   | 10  | 14  | 5  | 30  | 15  | 129 | 16  | 30  |
| 10  | 0   | 0   | 0  | 7   | 51  | 0   | 0   | 9   |
| 28  | 164 | 5   | 31 | 0   | 23  | 8   | 27  | 21  |
| 20  | 29  | 0   | 13 | 56  | 76  | 55  | 0   | 63  |
| 8   | 0   | 3   | 0  | 0   | 12  | 6   | 0   | 3   |
| 0   | 0   | 5   | 0  | 0   | 4   | 2   | 16  | 2   |
| 26  | 33  | 7   | 0  | 38  | 27  | 10  | 12  | 23  |

|     |     |     |     |     |     |      |     |     |
|-----|-----|-----|-----|-----|-----|------|-----|-----|
| 0   | 66  | 0   | 3   | 0   | 0   | 0    | 2   | 0   |
| 0   | 53  | 4   | 25  | 0   | 4   | 2    | 0   | 71  |
| 0   | 7   | 0   | 10  | 0   | 0   | 15   | 220 | 0   |
| 3   | 23  | 13  | 7   | 11  | 13  | 92   | 11  | 100 |
| 0   | 22  | 0   | 0   | 0   | 0   | 0    | 0   | 3   |
| 5   | 0   | 0   | 0   | 10  | 2   | 9    | 0   | 55  |
| 0   | 26  | 0   | 4   | 7   | 0   | 0    | 0   | 0   |
| 0   | 509 | 0   | 17  | 0   | 0   | 0    | 0   | 0   |
| 0   | 242 | 0   | 86  | 15  | 12  | 500  | 0   | 620 |
| 0   | 4   | 2   | 0   | 12  | 0   | 0    | 21  | 2   |
| 4   | 0   | 0   | 0   | 8   | 55  | 0    | 7   | 11  |
| 10  | 0   | 13  | 4   | 19  | 2   | 0    | 13  | 0   |
| 3   | 5   | 11  | 2   | 43  | 25  | 32   | 8   | 4   |
| 0   | 0   | 0   | 0   | 0   | 0   | 0    | 0   | 0   |
| 28  | 0   | 0   | 0   | 0   | 32  | 5    | 3   | 4   |
| 29  | 2   | 4   | 0   | 27  | 15  | 14   | 10  | 21  |
| 17  | 34  | 12  | 5   | 12  | 7   | 96   | 10  | 38  |
| 0   | 0   | 0   | 0   | 0   | 4   | 0    | 0   | 0   |
| 0   | 2   | 0   | 0   | 39  | 16  | 0    | 0   | 17  |
| 346 | 42  | 846 | 15  | 186 | 132 | 1135 | 498 | 221 |
| 0   | 0   | 0   | 0   | 0   | 2   | 0    | 0   | 0   |
| 17  | 2   | 13  | 2   | 22  | 82  | 17   | 30  | 147 |
| 0   | 0   | 0   | 0   | 55  | 283 | 0    | 0   | 0   |
| 0   | 0   | 0   | 0   | 0   | 0   | 0    | 0   | 0   |
| 2   | 0   | 0   | 0   | 0   | 18  | 0    | 0   | 158 |
| 4   | 25  | 14  | 8   | 19  | 12  | 249  | 0   | 87  |
| 0   | 0   | 0   | 0   | 0   | 272 | 0    | 0   | 0   |
| 0   | 14  | 7   | 18  | 10  | 2   | 27   | 43  | 81  |
| 0   | 0   | 0   | 2   | 0   | 12  | 0    | 0   | 2   |
| 0   | 13  | 0   | 0   | 0   | 0   | 0    | 0   | 0   |
| 0   | 0   | 42  | 2   | 128 | 0   | 3    | 9   | 32  |
| 0   | 28  | 0   | 3   | 0   | 0   | 0    | 0   | 0   |
| 0   | 5   | 0   | 11  | 0   | 0   | 36   | 0   | 0   |
| 45  | 0   | 0   | 0   | 0   | 0   | 0    | 0   | 0   |
| 0   | 0   | 0   | 0   | 0   | 0   | 0    | 0   | 25  |
| 0   | 0   | 3   | 15  | 0   | 0   | 7    | 7   | 0   |
| 0   | 656 | 0   | 164 | 0   | 0   | 0    | 0   | 0   |
| 0   | 0   | 0   | 7   | 0   | 0   | 0    | 0   | 0   |
| 0   | 0   | 0   | 4   | 0   | 0   | 0    | 2   | 0   |
| 0   | 0   | 5   | 0   | 0   | 2   | 0    | 0   | 0   |
| 0   | 0   | 0   | 0   | 0   | 138 | 0    | 0   | 0   |
| 0   | 0   | 0   | 2   | 0   | 0   | 0    | 0   | 0   |
| 6   | 0   | 0   | 0   | 0   | 0   | 0    | 0   | 0   |
| 0   | 0   | 0   | 0   | 83  | 13  | 22   | 9   | 10  |
| 0   | 43  | 14  | 27  | 10  | 0   | 16   | 11  | 62  |
| 0   | 52  | 0   | 7   | 0   | 0   | 0    | 0   | 0   |
| 0   | 203 | 111 | 79  | 7   | 0   | 9    | 273 | 0   |
| 0   | 3   | 0   | 3   | 0   | 0   | 0    | 0   | 0   |
| 0   | 26  | 0   | 24  | 0   | 0   | 0    | 2   | 0   |
| 0   | 23  | 13  | 3   | 4   | 0   | 0    | 16  | 0   |

|      |     |     |     |      |     |     |     |     |
|------|-----|-----|-----|------|-----|-----|-----|-----|
| 19   | 2   | 16  | 0   | 19   | 16  | 8   | 7   | 9   |
| 46   | 2   | 0   | 0   | 0    | 276 | 0   | 0   | 2   |
| 5    | 0   | 2   | 0   | 11   | 0   | 55  | 0   | 0   |
| 129  | 0   | 0   | 0   | 0    | 0   | 0   | 3   | 0   |
| 0    | 0   | 0   | 0   | 0    | 0   | 0   | 0   | 0   |
| 0    | 20  | 28  | 15  | 0    | 0   | 2   | 8   | 28  |
| 0    | 2   | 8   | 4   | 0    | 0   | 0   | 13  | 0   |
| 0    | 0   | 0   | 0   | 7    | 0   | 0   | 0   | 0   |
| 0    | 0   | 28  | 2   | 0    | 0   | 0   | 14  | 0   |
| 248  | 5   | 5   | 7   | 258  | 325 | 173 | 30  | 180 |
| 4    | 0   | 4   | 0   | 0    | 29  | 20  | 0   | 10  |
| 5    | 2   | 3   | 2   | 0    | 0   | 0   | 0   | 9   |
| 0    | 0   | 0   | 0   | 101  | 0   | 0   | 13  | 0   |
| 0    | 10  | 15  | 3   | 34   | 0   | 2   | 0   | 8   |
| 7    | 3   | 6   | 0   | 0    | 4   | 35  | 2   | 0   |
| 0    | 330 | 0   | 105 | 0    | 0   | 0   | 0   | 0   |
| 0    | 0   | 0   | 0   | 0    | 0   | 0   | 0   | 0   |
| 0    | 0   | 0   | 0   | 0    | 0   | 0   | 0   | 0   |
| 0    | 910 | 260 | 280 | 24   | 22  | 102 | 105 | 28  |
| 0    | 240 | 0   | 13  | 0    | 0   | 0   | 6   | 0   |
| 0    | 0   | 3   | 0   | 0    | 0   | 0   | 31  | 5   |
| 13   | 0   | 34  | 0   | 4    | 35  | 2   | 3   | 5   |
| 46   | 208 | 203 | 98  | 41   | 17  | 111 | 169 | 23  |
| 0    | 0   | 0   | 0   | 48   | 34  | 29  | 0   | 551 |
| 0    | 0   | 0   | 48  | 0    | 0   | 0   | 0   | 0   |
| 16   | 21  | 28  | 11  | 30   | 5   | 22  | 50  | 46  |
| 0    | 31  | 14  | 0   | 2    | 0   | 0   | 0   | 0   |
| 0    | 543 | 0   | 149 | 2    | 0   | 76  | 5   | 0   |
| 4    | 6   | 690 | 0   | 1308 | 20  | 0   | 0   | 10  |
| 67   | 282 | 70  | 28  | 375  | 207 | 111 | 53  | 62  |
| 296  | 0   | 0   | 0   | 502  | 31  | 0   | 0   | 11  |
| 0    | 209 | 0   | 0   | 0    | 0   | 2   | 0   | 3   |
| 0    | 0   | 32  | 0   | 0    | 0   | 0   | 3   | 0   |
| 0    | 31  | 0   | 123 | 0    | 0   | 0   | 0   | 0   |
| 12   | 0   | 0   | 0   | 0    | 0   | 0   | 116 | 0   |
| 27   | 0   | 293 | 0   | 561  | 10  | 0   | 0   | 38  |
| 76   | 0   | 0   | 0   | 0    | 743 | 0   | 0   | 18  |
| 4977 | 0   | 0   | 3   | 0    | 0   | 0   | 21  | 0   |
| 0    | 0   | 23  | 16  | 0    | 0   | 0   | 0   | 0   |
| 7    | 19  | 12  | 29  | 3    | 0   | 119 | 6   | 43  |
| 14   | 5   | 95  | 0   | 9    | 36  | 78  | 11  | 53  |
| 2    | 143 | 312 | 85  | 61   | 28  | 738 | 299 | 525 |
| 0    | 0   | 0   | 0   | 0    | 0   | 123 | 0   | 0   |
| 4    | 24  | 289 | 13  | 54   | 78  | 470 | 315 | 40  |
| 0    | 0   | 0   | 22  | 647  | 0   | 10  | 9   | 0   |
| 0    | 0   | 0   | 0   | 0    | 0   | 0   | 0   | 0   |
| 0    | 0   | 0   | 4   | 0    | 0   | 4   | 28  | 0   |
| 2    | 0   | 0   | 0   | 3    | 13  | 43  | 0   | 7   |
| 5    | 0   | 0   | 0   | 41   | 0   | 0   | 123 | 4   |
| 0    | 147 | 3   | 12  | 3    | 0   | 24  | 8   | 0   |

|     |     |      |     |      |     |     |     |      |
|-----|-----|------|-----|------|-----|-----|-----|------|
| 0   | 10  | 0    | 6   | 0    | 0   | 0   | 0   | 0    |
| 0   | 0   | 0    | 0   | 0    | 0   | 0   | 0   | 0    |
| 0   | 23  | 0    | 0   | 0    | 0   | 0   | 0   | 2    |
| 13  | 0   | 18   | 5   | 78   | 0   | 123 | 288 | 2    |
| 0   | 346 | 233  | 84  | 28   | 0   | 5   | 35  | 3    |
| 7   | 0   | 0    | 0   | 19   | 48  | 93  | 0   | 0    |
| 0   | 0   | 0    | 2   | 0    | 0   | 0   | 3   | 0    |
| 44  | 79  | 124  | 19  | 60   | 46  | 442 | 195 | 274  |
| 0   | 0   | 0    | 0   | 0    | 96  | 0   | 0   | 0    |
| 0   | 0   | 0    | 0   | 0    | 0   | 0   | 0   | 0    |
| 22  | 0   | 0    | 0   | 6    | 266 | 431 | 0   | 87   |
| 9   | 11  | 0    | 5   | 9    | 22  | 0   | 31  | 0    |
| 12  | 4   | 0    | 0   | 0    | 0   | 0   | 0   | 3    |
| 0   | 0   | 0    | 0   | 0    | 0   | 0   | 7   | 4    |
| 0   | 0   | 2    | 0   | 0    | 12  | 0   | 0   | 0    |
| 117 | 135 | 223  | 155 | 191  | 108 | 513 | 177 | 1156 |
| 3   | 0   | 0    | 2   | 0    | 0   | 0   | 0   | 0    |
| 7   | 0   | 46   | 0   | 198  | 0   | 0   | 4   | 5    |
| 0   | 0   | 0    | 38  | 0    | 0   | 0   | 0   | 0    |
| 0   | 13  | 99   | 5   | 15   | 6   | 13  | 11  | 4    |
| 0   | 198 | 218  | 55  | 54   | 0   | 20  | 460 | 8    |
| 48  | 7   | 36   | 18  | 315  | 54  | 80  | 49  | 31   |
| 0   | 3   | 124  | 19  | 0    | 16  | 0   | 74  | 84   |
| 45  | 36  | 0    | 0   | 0    | 45  | 10  | 17  | 18   |
| 0   | 0   | 0    | 0   | 0    | 0   | 0   | 0   | 0    |
| 0   | 21  | 186  | 2   | 50   | 0   | 0   | 77  | 0    |
| 4   | 0   | 0    | 0   | 46   | 2   | 0   | 0   | 10   |
| 19  | 87  | 0    | 0   | 1242 | 11  | 444 | 247 | 9    |
| 8   | 0   | 3    | 0   | 0    | 0   | 5   | 0   | 2    |
| 237 | 0   | 40   | 0   | 64   | 53  | 81  | 4   | 62   |
| 349 | 0   | 16   | 0   | 124  | 115 | 448 | 7   | 5    |
| 4   | 3   | 0    | 0   | 4    | 17  | 0   | 10  | 12   |
| 0   | 0   | 4    | 0   | 0    | 0   | 0   | 12  | 0    |
| 0   | 496 | 0    | 5   | 0    | 0   | 0   | 0   | 0    |
| 0   | 0   | 0    | 0   | 0    | 10  | 2   | 0   | 6    |
| 0   | 0   | 1361 | 3   | 320  | 0   | 0   | 0   | 0    |
| 137 | 0   | 0    | 0   | 481  | 0   | 0   | 0   | 11   |
| 2   | 2   | 5    | 0   | 7    | 6   | 0   | 27  | 2    |
| 0   | 167 | 5    | 2   | 208  | 0   | 0   | 0   | 3    |
| 0   | 0   | 0    | 52  | 0    | 0   | 0   | 0   | 0    |
| 2   | 0   | 0    | 19  | 0    | 0   | 0   | 155 | 0    |
| 0   | 2   | 54   | 11  | 0    | 0   | 0   | 89  | 0    |
| 0   | 388 | 0    | 0   | 0    | 0   | 0   | 0   | 247  |
| 34  | 94  | 13   | 0   | 78   | 210 | 73  | 0   | 23   |
| 0   | 0   | 0    | 0   | 0    | 22  | 0   | 0   | 0    |
| 0   | 19  | 116  | 4   | 11   | 0   | 0   | 11  | 0    |
| 0   | 2   | 19   | 2   | 176  | 4   | 51  | 162 | 417  |
| 10  | 0   | 0    | 0   | 80   | 2   | 0   | 16  | 0    |
| 84  | 3   | 55   | 9   | 14   | 170 | 10  | 53  | 544  |
| 0   | 57  | 5    | 89  | 0    | 0   | 0   | 3   | 0    |

|             |             |             |             |             |             |             |             |             |
|-------------|-------------|-------------|-------------|-------------|-------------|-------------|-------------|-------------|
| 0           | 100         | 3           | 77          | 0           | 0           | 0           | 18          | 2           |
| 0           | 0           | 0           | 0           | 251         | 1376        | 0           | 3           | 0           |
| 0           | 0           | 0           | 0           | 0           | 47          | 0           | 17          | 6           |
| 220         | 0           | 0           | 0           | 0           | 0           | 0           | 0           | 0           |
| 92          | 0           | 6           | 0           | 0           | 12          | 0           | 0           | 29          |
| 11          | 139         | 68          | 59          | 87          | 6           | 86          | 47          | 39          |
| 0           | 215         | 10          | 80          | 3           | 13          | 13          | 13          | 117         |
| 24          | 94          | 29          | 0           | 452         | 67          | 5           | 2           | 7           |
| 2           | 0           | 0           | 2           | 37          | 2           | 10          | 0           | 624         |
| 11          | 4           | 4           | 5           | 248         | 131         | 51          | 21          | 14          |
| 30          | 3           | 50          | 0           | 35          | 353         | 61          | 6           | 90          |
| 5           | 8           | 39          | 7           | 82          | 30          | 50          | 137         | 6           |
| 0           | 658         | 0           | 204         | 0           | 0           | 0           | 9           | 0           |
| 0           | 46          | 144         | 52          | 0           | 34          | 19          | 349         | 9           |
| 37          | 0           | 0           | 0           | 0           | 94          | 0           | 0           | 0           |
| 14          | 0           | 2           | 0           | 6           | 7           | 0           | 366         | 9           |
| 0           | 137         | 0           | 67          | 0           | 0           | 0           | 10          | 0           |
| 0           | 0           | 0           | 0           | 0           | 0           | 0           | 0           | 0           |
| 9           | 294         | 14          | 34          | 4           | 24          | 11          | 17          | 19          |
| 0           | 0           | 0           | 4           | 18          | 0           | 0           | 0           | 0           |
| 108         | 41          | 0           | 0           | 0           | 111         | 0           | 0           | 2           |
| 0           | 18          | 2           | 5           | 11          | 2           | 29          | 0           | 383         |
| 0           | 0           | 0           | 0           | 0           | 2214        | 0           | 0           | 0           |
| 0           | 0           | 0           | 0           | 0           | 0           | 0           | 0           | 64          |
| 0           | 0           | 0           | 2           | 6           | 0           | 0           | 2           | 0           |
| 101         | 55          | 115         | 54          | 175         | 188         | 95          | 24          | 60          |
| 0           | 0           | 2           | 0           | 10          | 2           | 0           | 32          | 3           |
| 0           | 217         | 0           | 2           | 0           | 0           | 0           | 4           | 0           |
| 5           | 0           | 0           | 0           | 0           | 0           | 0           | 0           | 0           |
| 0           | 25          | 11          | 3           | 4           | 0           | 2           | 17          | 2           |
| 0           | 2           | 0           | 35          | 5           | 11          | 117         | 2           | 123         |
| 0           | 0           | 0           | 0           | 0           | 0           | 0           | 10          | 0           |
| 12          | 11          | 22          | 0           | 19          | 24          | 15          | 3           | 18          |
| 0           | 0           | 0           | 0           | 0           | 0           | 0           | 0           | 0           |
| <b>7859</b> | <b>7464</b> | <b>5984</b> | <b>2375</b> | <b>9449</b> | <b>7726</b> | <b>5704</b> | <b>4777</b> | <b>6367</b> |

| 187_wt_4 | 199_are_4 | 188_wt_12 | 222_wt_8 | 203_are_8 | 201_are_4 | 185_are_1 | 199_are_8 | 200_are_4 |
|----------|-----------|-----------|----------|-----------|-----------|-----------|-----------|-----------|
| 0        | 0         | 2         | 0        | 2355      | 0         | 741       | 426       | 0         |
| 42       | 456       | 6         | 149      | 57        | 813       | 240       | 66        | 212       |
| 260      | 6         | 0         | 3        | 0         | 0         | 0         | 0         | 13        |
| 0        | 2         | 27        | 144      | 0         | 0         | 0         | 0         | 30        |
| 0        | 0         | 6         | 2        | 0         | 0         | 0         | 0         | 0         |
| 0        | 0         | 0         | 0        | 68        | 0         | 135       | 100       | 0         |
| 0        | 2         | 30        | 4        | 123       | 11        | 4         | 61        | 18        |
| 0        | 0         | 0         | 0        | 8         | 0         | 31        | 36        | 34        |
| 0        | 0         | 0         | 0        | 63        | 0         | 226       | 54        | 0         |
| 23       | 0         | 0         | 0        | 10        | 0         | 28        | 7         | 0         |
| 0        | 0         | 3         | 0        | 0         | 0         | 0         | 0         | 0         |
| 0        | 7         | 2         | 6        | 4         | 152       | 2         | 14        | 0         |
| 0        | 0         | 0         | 0        | 0         | 0         | 0         | 3         | 0         |
| 0        | 15        | 37        | 367      | 0         | 0         | 12        | 13        | 9         |
| 3        | 7         | 0         | 21       | 0         | 40        | 0         | 0         | 17        |
| 3        | 86        | 5         | 0        | 89        | 235       | 71        | 27        | 30        |
| 0        | 0         | 0         | 0        | 0         | 0         | 0         | 0         | 2         |
| 0        | 0         | 197       | 0        | 6         | 0         | 0         | 0         | 0         |
| 0        | 12        | 92        | 16       | 0         | 16        | 0         | 0         | 64        |
| 0        | 0         | 12        | 0        | 0         | 9         | 0         | 0         | 0         |
| 0        | 0         | 0         | 0        | 3         | 89        | 0         | 0         | 5         |
| 23       | 119       | 29        | 16       | 24        | 78        | 16        | 33        | 45        |
| 19       | 219       | 4         | 0        | 8         | 18        | 14        | 64        | 26        |
| 0        | 0         | 2         | 383      | 19        | 26        | 10        | 12        | 0         |
| 0        | 0         | 0         | 0        | 0         | 0         | 0         | 0         | 0         |
| 0        | 18        | 0         | 0        | 9         | 8         | 5         | 18        | 3         |
| 35       | 7         | 34        | 55       | 35        | 19        | 21        | 22        | 36        |
| 0        | 260       | 21        | 8        | 35        | 159       | 96        | 85        | 183       |
| 0        | 356       | 70        | 47       | 35        | 376       | 194       | 109       | 6         |
| 4        | 2         | 13        | 38       | 2         | 6         | 0         | 7         | 3         |
| 0        | 0         | 0         | 15       | 5         | 0         | 0         | 0         | 0         |
| 0        | 8         | 16        | 26       | 0         | 0         | 2         | 0         | 23        |
| 0        | 10        | 14        | 9        | 5         | 0         | 5         | 34        | 14        |
| 0        | 39        | 87        | 154      | 0         | 0         | 0         | 8         | 113       |
| 650      | 54        | 935       | 969      | 153       | 170       | 183       | 198       | 117       |
| 33       | 15        | 4         | 4        | 12        | 153       | 20        | 12        | 9         |
| 0        | 4         | 5         | 20       | 28        | 23        | 46        | 18        | 4         |
| 0        | 0         | 0         | 0        | 0         | 0         | 0         | 0         | 0         |
| 0        | 0         | 0         | 0        | 2         | 0         | 67        | 8         | 0         |
| 0        | 0         | 0         | 0        | 15        | 0         | 16        | 23        | 0         |
| 0        | 0         | 0         | 0        | 0         | 0         | 0         | 0         | 0         |
| 0        | 0         | 0         | 0        | 10        | 93        | 8         | 13        | 0         |
| 0        | 0         | 19        | 0        | 0         | 24        | 0         | 0         | 0         |
| 10       | 18        | 6         | 3        | 20        | 114       | 51        | 61        | 62        |
| 0        | 86        | 1538      | 0        | 6         | 602       | 0         | 0         | 176       |
| 22       | 68        | 13        | 11       | 24        | 39        | 60        | 26        | 99        |
| 4        | 382       | 12        | 0        | 20        | 129       | 0         | 159       | 132       |
| 17       | 4         | 50        | 26       | 14        | 6         | 8         | 15        | 17        |
| 0        | 0         | 0         | 4        | 0         | 0         | 0         | 0         | 0         |

|      |     |     |     |     |     |     |     |     |
|------|-----|-----|-----|-----|-----|-----|-----|-----|
| 0    | 0   | 0   | 0   | 110 | 10  | 70  | 27  | 0   |
| 0    | 0   | 0   | 0   | 2   | 0   | 12  | 114 | 0   |
| 39   | 28  | 21  | 216 | 42  | 87  | 126 | 63  | 11  |
| 6    | 7   | 65  | 98  | 12  | 4   | 4   | 20  | 26  |
| 0    | 0   | 3   | 25  | 0   | 4   | 2   | 53  | 0   |
| 2153 | 273 | 13  | 11  | 92  | 449 | 245 | 311 | 232 |
| 116  | 99  | 28  | 4   | 26  | 67  | 44  | 41  | 65  |
| 0    | 23  | 66  | 26  | 0   | 44  | 0   | 0   | 26  |
| 2    | 0   | 4   | 3   | 65  | 0   | 2   | 0   | 0   |
| 0    | 0   | 39  | 11  | 6   | 176 | 0   | 0   | 179 |
| 180  | 12  | 29  | 0   | 11  | 55  | 0   | 7   | 3   |
| 0    | 0   | 0   | 0   | 0   | 0   | 0   | 0   | 0   |
| 0    | 0   | 0   | 0   | 0   | 0   | 14  | 0   | 0   |
| 98   | 136 | 16  | 8   | 48  | 52  | 24  | 65  | 65  |
| 0    | 0   | 3   | 10  | 2   | 0   | 0   | 2   | 0   |
| 0    | 3   | 4   | 16  | 0   | 0   | 0   | 0   | 4   |
| 2    | 0   | 0   | 0   | 68  | 0   | 24  | 66  | 2   |
| 9    | 12  | 9   | 3   | 0   | 9   | 0   | 0   | 25  |
| 61   | 23  | 3   | 27  | 0   | 14  | 0   | 0   | 20  |
| 109  | 64  | 9   | 0   | 4   | 10  | 29  | 4   | 19  |
| 0    | 31  | 4   | 0   | 40  | 5   | 39  | 118 | 38  |
| 0    | 46  | 45  | 3   | 0   | 11  | 0   | 2   | 40  |
| 0    | 0   | 10  | 10  | 4   | 0   | 0   | 6   | 0   |
| 0    | 0   | 0   | 0   | 0   | 0   | 2   | 124 | 0   |
| 0    | 3   | 32  | 0   | 0   | 8   | 0   | 11  | 0   |
| 0    | 87  | 0   | 0   | 13  | 33  | 4   | 5   | 31  |
| 0    | 0   | 0   | 0   | 11  | 0   | 6   | 0   | 0   |
| 33   | 4   | 0   | 0   | 2   | 20  | 5   | 5   | 4   |
| 8    | 8   | 10  | 28  | 4   | 24  | 0   | 16  | 12  |
| 0    | 0   | 50  | 39  | 21  | 109 | 9   | 8   | 6   |
| 0    | 3   | 16  | 2   | 8   | 4   | 8   | 17  | 0   |
| 0    | 0   | 0   | 0   | 113 | 51  | 63  | 46  | 0   |
| 27   | 0   | 5   | 0   | 2   | 14  | 6   | 19  | 0   |
| 0    | 0   | 0   | 0   | 2   | 3   | 11  | 0   | 0   |
| 0    | 0   | 5   | 19  | 0   | 0   | 0   | 2   | 4   |
| 0    | 11  | 21  | 22  | 0   | 0   | 0   | 2   | 28  |
| 0    | 0   | 0   | 0   | 0   | 0   | 0   | 0   | 0   |
| 0    | 0   | 0   | 11  | 0   | 0   | 0   | 0   | 0   |
| 0    | 0   | 0   | 0   | 0   | 60  | 22  | 18  | 13  |
| 0    | 0   | 2   | 18  | 0   | 0   | 0   | 17  | 0   |
| 456  | 81  | 0   | 0   | 16  | 24  | 37  | 32  | 40  |
| 148  | 47  | 0   | 0   | 36  | 173 | 14  | 50  | 8   |
| 25   | 120 | 4   | 4   | 18  | 63  | 18  | 30  | 80  |
| 21   | 99  | 20  | 18  | 4   | 37  | 7   | 4   | 34  |
| 0    | 0   | 0   | 19  | 4   | 0   | 14  | 0   | 0   |
| 12   | 0   | 147 | 46  | 93  | 3   | 4   | 8   | 0   |
| 0    | 0   | 4   | 129 | 7   | 7   | 3   | 15  | 0   |
| 0    | 0   | 24  | 11  | 4   | 25  | 0   | 0   | 19  |
| 0    | 0   | 3   | 12  | 0   | 0   | 0   | 2   | 10  |
| 11   | 3   | 12  | 12  | 27  | 10  | 26  | 7   | 13  |



|     |     |    |     |      |     |     |     |     |
|-----|-----|----|-----|------|-----|-----|-----|-----|
| 0   | 0   | 0  | 0   | 5    | 0   | 29  | 9   | 0   |
| 0   | 52  | 3  | 2   | 40   | 53  | 62  | 52  | 35  |
| 0   | 9   | 9  | 0   | 123  | 20  | 52  | 0   | 33  |
| 0   | 134 | 40 | 22  | 5    | 135 | 6   | 40  | 10  |
| 0   | 0   | 0  | 0   | 0    | 0   | 17  | 11  | 0   |
| 0   | 2   | 15 | 5   | 0    | 0   | 0   | 0   | 0   |
| 0   | 0   | 0  | 0   | 48   | 0   | 35  | 0   | 0   |
| 0   | 0   | 0  | 0   | 3    | 0   | 11  | 20  | 0   |
| 0   | 0   | 47 | 28  | 115  | 0   | 243 | 384 | 0   |
| 0   | 14  | 2  | 0   | 3    | 23  | 0   | 0   | 6   |
| 0   | 0   | 0  | 4   | 0    | 2   | 0   | 0   | 13  |
| 0   | 48  | 22 | 0   | 6    | 59  | 5   | 13  | 82  |
| 12  | 4   | 21 | 24  | 10   | 19  | 6   | 20  | 0   |
| 0   | 0   | 0  | 0   | 0    | 0   | 0   | 0   | 0   |
| 0   | 4   | 26 | 21  | 0    | 5   | 0   | 0   | 15  |
| 18  | 9   | 6  | 11  | 9    | 38  | 6   | 13  | 39  |
| 38  | 7   | 15 | 25  | 8    | 83  | 10  | 14  | 8   |
| 0   | 0   | 0  | 3   | 2    | 0   | 0   | 0   | 0   |
| 0   | 0   | 14 | 35  | 0    | 0   | 0   | 0   | 0   |
| 7   | 247 | 42 | 356 | 11   | 552 | 24  | 185 | 576 |
| 0   | 0   | 0  | 0   | 0    | 0   | 0   | 0   | 0   |
| 35  | 43  | 94 | 5   | 6    | 68  | 4   | 13  | 10  |
| 0   | 0   | 0  | 0   | 0    | 0   | 4   | 219 | 0   |
| 0   | 0   | 0  | 0   | 0    | 0   | 0   | 0   | 0   |
| 0   | 14  | 17 | 14  | 0    | 0   | 0   | 3   | 6   |
| 81  | 55  | 19 | 15  | 0    | 0   | 57  | 0   | 51  |
| 0   | 0   | 0  | 95  | 0    | 0   | 0   | 0   | 0   |
| 26  | 65  | 12 | 17  | 14   | 51  | 4   | 53  | 45  |
| 0   | 0   | 0  | 74  | 3    | 0   | 0   | 4   | 0   |
| 0   | 0   | 0  | 0   | 2    | 0   | 0   | 0   | 0   |
| 0   | 0   | 0  | 0   | 7    | 0   | 5   | 2   | 0   |
| 0   | 0   | 0  | 0   | 9    | 0   | 37  | 26  | 0   |
| 0   | 0   | 0  | 0   | 0    | 0   | 0   | 0   | 0   |
| 0   | 0   | 0  | 0   | 0    | 0   | 0   | 0   | 0   |
| 0   | 0   | 0  | 0   | 0    | 0   | 0   | 0   | 0   |
| 41  | 15  | 0  | 0   | 2    | 37  | 7   | 29  | 26  |
| 0   | 0   | 0  | 0   | 1150 | 6   | 534 | 301 | 0   |
| 0   | 0   | 0  | 0   | 14   | 0   | 0   | 6   | 0   |
| 0   | 0   | 0  | 0   | 9    | 0   | 18  | 11  | 0   |
| 0   | 0   | 0  | 0   | 0    | 0   | 0   | 5   | 0   |
| 0   | 0   | 2  | 113 | 0    | 0   | 0   | 0   | 0   |
| 0   | 0   | 0  | 0   | 0    | 0   | 0   | 0   | 0   |
| 0   | 0   | 0  | 0   | 0    | 0   | 0   | 0   | 0   |
| 0   | 0   | 18 | 7   | 9    | 0   | 0   | 32  | 8   |
| 4   | 44  | 0  | 0   | 13   | 21  | 29  | 48  | 35  |
| 0   | 0   | 0  | 0   | 16   | 0   | 0   | 17  | 0   |
| 179 | 172 | 0  | 0   | 102  | 317 | 301 | 115 | 74  |
| 0   | 3   | 0  | 0   | 0    | 2   | 2   | 4   | 0   |
| 0   | 0   | 0  | 0   | 62   | 2   | 0   | 0   | 0   |
| 18  | 18  | 0  | 0   | 3    | 36  | 0   | 6   | 31  |

|     |     |     |     |      |     |      |      |     |
|-----|-----|-----|-----|------|-----|------|------|-----|
| 0   | 3   | 8   | 10  | 5    | 7   | 4    | 49   | 6   |
| 0   | 0   | 0   | 10  | 0    | 0   | 0    | 0    | 0   |
| 0   | 0   | 4   | 0   | 4    | 0   | 0    | 0    | 0   |
| 0   | 0   | 0   | 0   | 0    | 0   | 0    | 19   | 0   |
| 0   | 0   | 0   | 0   | 0    | 0   | 26   | 3    | 0   |
| 0   | 0   | 0   | 5   | 8    | 0   | 11   | 37   | 21  |
| 6   | 0   | 0   | 0   | 0    | 2   | 0    | 0    | 0   |
| 38  | 0   | 0   | 0   | 0    | 0   | 0    | 0    | 11  |
| 0   | 0   | 0   | 0   | 2    | 16  | 8    | 2    | 3   |
| 437 | 28  | 110 | 266 | 0    | 56  | 8    | 16   | 113 |
| 0   | 17  | 23  | 114 | 0    | 27  | 0    | 0    | 79  |
| 0   | 0   | 2   | 12  | 7    | 0   | 10   | 4    | 3   |
| 0   | 0   | 0   | 0   | 0    | 0   | 0    | 2    | 0   |
| 0   | 0   | 14  | 4   | 12   | 0   | 0    | 5    | 0   |
| 0   | 8   | 0   | 30  | 0    | 5   | 0    | 0    | 0   |
| 0   | 0   | 0   | 0   | 270  | 0   | 64   | 72   | 0   |
| 0   | 0   | 0   | 0   | 0    | 0   | 190  | 0    | 0   |
| 0   | 6   | 2   | 0   | 0    | 0   | 0    | 0    | 0   |
| 480 | 574 | 22  | 14  | 1119 | 597 | 1815 | 2356 | 321 |
| 0   | 0   | 0   | 0   | 110  | 0   | 131  | 32   | 0   |
| 0   | 0   | 7   | 6   | 27   | 0   | 0    | 0    | 0   |
| 5   | 2   | 3   | 4   | 2    | 0   | 3    | 0    | 11  |
| 91  | 135 | 198 | 121 | 254  | 201 | 107  | 67   | 73  |
| 0   | 0   | 2   | 2   | 0    | 0   | 0    | 0    | 0   |
| 0   | 0   | 0   | 0   | 75   | 11  | 2    | 12   | 0   |
| 56  | 22  | 26  | 36  | 7    | 115 | 21   | 14   | 11  |
| 54  | 29  | 0   | 0   | 13   | 33  | 28   | 16   | 16  |
| 0   | 0   | 0   | 0   | 436  | 2   | 215  | 766  | 0   |
| 0   | 17  | 170 | 0   | 0    | 0   | 13   | 0    | 0   |
| 36  | 8   | 71  | 52  | 196  | 32  | 163  | 136  | 21  |
| 0   | 0   | 13  | 27  | 0    | 0   | 33   | 0    | 0   |
| 0   | 0   | 2   | 0   | 115  | 0   | 87   | 5    | 0   |
| 0   | 0   | 83  | 0   | 0    | 0   | 0    | 0    | 174 |
| 0   | 0   | 0   | 0   | 334  | 0   | 60   | 3    | 0   |
| 0   | 0   | 0   | 0   | 7    | 0   | 2    | 4    | 0   |
| 0   | 2   | 101 | 8   | 0    | 0   | 6    | 3    | 3   |
| 0   | 0   | 31  | 2   | 0    | 0   | 0    | 0    | 0   |
| 0   | 0   | 0   | 0   | 0    | 0   | 0    | 0    | 0   |
| 5   | 0   | 0   | 0   | 0    | 0   | 2    | 6    | 0   |
| 0   | 9   | 279 | 51  | 224  | 77  | 29   | 0    | 18  |
| 0   | 53  | 99  | 77  | 3    | 170 | 2    | 9    | 92  |
| 0   | 692 | 245 | 57  | 76   | 961 | 424  | 324  | 622 |
| 0   | 0   | 0   | 0   | 0    | 0   | 32   | 0    | 2   |
| 135 | 693 | 21  | 168 | 12   | 354 | 3    | 58   | 248 |
| 0   | 2   | 0   | 0   | 49   | 4   | 2    | 21   | 0   |
| 0   | 0   | 0   | 0   | 0    | 9   | 0    | 2    | 0   |
| 0   | 2   | 0   | 0   | 4    | 145 | 80   | 9    | 3   |
| 0   | 0   | 3   | 6   | 2    | 0   | 0    | 4    | 0   |
| 0   | 0   | 16  | 0   | 2    | 0   | 0    | 2    | 4   |
| 299 | 4   | 0   | 0   | 91   | 159 | 155  | 146  | 0   |

|     |     |     |     |     |      |     |     |     |
|-----|-----|-----|-----|-----|------|-----|-----|-----|
| 0   | 6   | 0   | 0   | 6   | 0    | 2   | 6   | 18  |
| 0   | 0   | 0   | 0   | 0   | 0    | 0   | 0   | 0   |
| 0   | 0   | 0   | 2   | 4   | 0    | 8   | 10  | 0   |
| 3   | 7   | 9   | 0   | 4   | 21   | 21  | 7   | 10  |
| 47  | 352 | 15  | 2   | 26  | 657  | 220 | 239 | 72  |
| 0   | 0   | 0   | 19  | 0   | 0    | 0   | 18  | 0   |
| 0   | 0   | 0   | 0   | 0   | 10   | 5   | 9   | 0   |
| 86  | 245 | 53  | 102 | 21  | 708  | 60  | 60  | 437 |
| 0   | 0   | 2   | 0   | 0   | 0    | 0   | 0   | 0   |
| 0   | 0   | 0   | 0   | 0   | 0    | 0   | 0   | 0   |
| 15  | 15  | 3   | 225 | 2   | 21   | 0   | 0   | 17  |
| 0   | 0   | 63  | 8   | 65  | 11   | 0   | 0   | 3   |
| 0   | 0   | 12  | 0   | 88  | 408  | 0   | 5   | 55  |
| 0   | 39  | 0   | 0   | 0   | 76   | 0   | 0   | 74  |
| 12  | 0   | 0   | 19  | 0   | 0    | 0   | 0   | 0   |
| 0   | 417 | 872 | 205 | 57  | 1024 | 130 | 354 | 271 |
| 0   | 0   | 0   | 0   | 65  | 0    | 0   | 37  | 0   |
| 0   | 0   | 0   | 0   | 2   | 0    | 0   | 0   | 0   |
| 114 | 0   | 0   | 0   | 33  | 0    | 0   | 153 | 0   |
| 6   | 11  | 34  | 22  | 7   | 15   | 17  | 11  | 16  |
| 87  | 354 | 12  | 11  | 75  | 79   | 169 | 217 | 131 |
| 34  | 50  | 181 | 59  | 85  | 116  | 0   | 37  | 40  |
| 4   | 408 | 51  | 15  | 0   | 286  | 89  | 33  | 111 |
| 8   | 4   | 35  | 42  | 4   | 10   | 10  | 8   | 15  |
| 0   | 0   | 0   | 0   | 0   | 0    | 0   | 0   | 0   |
| 0   | 0   | 0   | 0   | 15  | 0    | 24  | 0   | 0   |
| 0   | 0   | 17  | 17  | 2   | 12   | 0   | 3   | 0   |
| 0   | 0   | 610 | 563 | 156 | 0    | 0   | 14  | 17  |
| 0   | 9   | 132 | 55  | 0   | 0    | 0   | 0   | 7   |
| 0   | 33  | 77  | 76  | 0   | 222  | 0   | 0   | 74  |
| 0   | 28  | 58  | 182 | 0   | 0    | 0   | 2   | 22  |
| 4   | 10  | 6   | 12  | 0   | 0    | 0   | 0   | 13  |
| 0   | 0   | 0   | 0   | 18  | 0    | 8   | 9   | 0   |
| 0   | 0   | 0   | 0   | 48  | 0    | 216 | 46  | 0   |
| 0   | 0   | 0   | 0   | 3   | 0    | 0   | 0   | 0   |
| 0   | 0   | 0   | 0   | 0   | 0    | 0   | 2   | 0   |
| 0   | 0   | 7   | 0   | 2   | 0    | 0   | 0   | 0   |
| 0   | 0   | 0   | 2   | 4   | 3    | 0   | 2   | 5   |
| 0   | 0   | 2   | 0   | 163 | 0    | 243 | 6   | 0   |
| 0   | 0   | 0   | 0   | 205 | 0    | 49  | 31  | 0   |
| 0   | 0   | 0   | 0   | 377 | 2422 | 10  | 9   | 0   |
| 0   | 6   | 0   | 10  | 10  | 516  | 0   | 0   | 0   |
| 0   | 0   | 0   | 0   | 0   | 0    | 0   | 0   | 0   |
| 0   | 6   | 17  | 32  | 8   | 0    | 0   | 40  | 24  |
| 0   | 0   | 0   | 0   | 0   | 0    | 2   | 42  | 0   |
| 0   | 20  | 0   | 0   | 2   | 35   | 35  | 0   | 75  |
| 0   | 0   | 23  | 28  | 13  | 0    | 0   | 4   | 9   |
| 0   | 0   | 81  | 88  | 17  | 0    | 0   | 0   | 0   |
| 659 | 454 | 223 | 527 | 11  | 39   | 27  | 0   | 166 |
| 0   | 0   | 0   | 0   | 34  | 19   | 313 | 150 | 20  |

|             |             |             |             |             |              |             |             |             |
|-------------|-------------|-------------|-------------|-------------|--------------|-------------|-------------|-------------|
| 0           | 77          | 0           | 0           | 125         | 102          | 254         | 302         | 63          |
| 0           | 0           | 0           | 4           | 0           | 0            | 9           | 780         | 0           |
| 0           | 7           | 62          | 4           | 4           | 59           | 2           | 3           | 82          |
| 0           | 0           | 0           | 0           | 0           | 0            | 0           | 0           | 0           |
| 0           | 34          | 22          | 31          | 0           | 107          | 3           | 0           | 18          |
| 460         | 117         | 17          | 24          | 26          | 220          | 339         | 164         | 29          |
| 33          | 74          | 28          | 3           | 193         | 90           | 252         | 247         | 52          |
| 97          | 4           | 20          | 49          | 5           | 5            | 9           | 58          | 2           |
| 0           | 0           | 191         | 0           | 0           | 0            | 0           | 5           | 0           |
| 7           | 12          | 133         | 13          | 0           | 5            | 0           | 0           | 21          |
| 0           | 0           | 5           | 60          | 17          | 0            | 5           | 10          | 8           |
| 9           | 53          | 72          | 204         | 14          | 95           | 2           | 8           | 28          |
| 2272        | 0           | 0           | 0           | 465         | 0            | 553         | 1101        | 0           |
| 116         | 254         | 47          | 33          | 32          | 200          | 134         | 144         | 97          |
| 0           | 0           | 0           | 33          | 2           | 0            | 2           | 4           | 0           |
| 0           | 19          | 0           | 31          | 0           | 14           | 0           | 15          | 27          |
| 0           | 0           | 0           | 0           | 0           | 0            | 7           | 0           | 0           |
| 0           | 0           | 0           | 0           | 0           | 0            | 0           | 0           | 0           |
| 11          | 0           | 88          | 44          | 121         | 3            | 7           | 8           | 2           |
| 253         | 0           | 0           | 0           | 31          | 0            | 207         | 8           | 0           |
| 0           | 0           | 0           | 42          | 23          | 0            | 6           | 18          | 0           |
| 17          | 44          | 58          | 18          | 0           | 9            | 0           | 0           | 48          |
| 0           | 0           | 38          | 28          | 0           | 0            | 0           | 6           | 0           |
| 0           | 153         | 134         | 0           | 5           | 396          | 27          | 5           | 648         |
| 0           | 0           | 0           | 0           | 0           | 0            | 7           | 0           | 0           |
| 293         | 15          | 66          | 34          | 50          | 60           | 10          | 8           | 47          |
| 65          | 121         | 0           | 58          | 0           | 373          | 0           | 0           | 311         |
| 0           | 0           | 0           | 0           | 2           | 0            | 0           | 3           | 0           |
| 0           | 0           | 0           | 0           | 0           | 0            | 0           | 0           | 0           |
| 126         | 25          | 11          | 0           | 15          | 66           | 18          | 49          | 7           |
| 7           | 0           | 82          | 22          | 68          | 29           | 2           | 7           | 0           |
| 0           | 0           | 0           | 0           | 0           | 0            | 0           | 0           | 0           |
| 5           | 0           | 29          | 8           | 0           | 7            | 3           | 0           | 11          |
| 0           | 0           | 0           | 0           | 0           | 0            | 0           | 0           | 0           |
| <b>6492</b> | <b>5786</b> | <b>5241</b> | <b>4128</b> | <b>6287</b> | <b>11526</b> | <b>7248</b> | <b>8672</b> | <b>5052</b> |

| 246_are_1 | 353_wt_12 | 206_are_8 | 201_are_1 | 222_wt_4 | 185_are_8 | 190_are_4 | 204_wt_8 | 208_are_4 |
|-----------|-----------|-----------|-----------|----------|-----------|-----------|----------|-----------|
| 3376      | 0         | 2281      | 928       | 0        | 10538     | 2         | 4        | 0         |
| 9         | 0         | 87        | 76        | 10       | 163       | 79        | 3        | 402       |
| 0         | 4         | 0         | 0         | 38       | 0         | 0         | 0        | 0         |
| 0         | 3         | 0         | 0         | 5        | 0         | 22        | 0        | 0         |
| 2         | 75        | 0         | 0         | 0        | 0         | 0         | 0        | 0         |
| 0         | 0         | 0         | 0         | 0        | 2         | 0         | 0        | 0         |
| 46        | 41        | 0         | 11        | 127      | 87        | 32        | 4        | 12        |
| 2         | 0         | 70        | 0         | 0        | 172       | 0         | 0        | 108       |
| 50        | 0         | 20        | 52        | 0        | 278       | 0         | 0        | 0         |
| 38        | 0         | 15        | 70        | 0        | 54        | 0         | 0        | 0         |
| 0         | 83        | 0         | 0         | 0        | 0         | 0         | 0        | 0         |
| 36        | 0         | 8         | 2         | 0        | 0         | 0         | 0        | 11        |
| 0         | 0         | 0         | 0         | 0        | 0         | 0         | 0        | 9         |
| 0         | 29        | 4         | 3         | 56       | 0         | 0         | 0        | 2         |
| 0         | 3         | 0         | 0         | 4        | 0         | 11        | 0        | 11        |
| 54        | 2         | 37        | 60        | 0        | 121       | 8         | 0        | 11        |
| 0         | 0         | 0         | 6         | 0        | 0         | 308       | 0        | 431       |
| 2         | 280       | 0         | 0         | 4        | 0         | 0         | 0        | 0         |
| 0         | 253       | 0         | 0         | 7        | 0         | 39        | 0        | 31        |
| 0         | 0         | 0         | 0         | 0        | 0         | 115       | 0        | 0         |
| 3         | 0         | 13        | 3         | 0        | 4         | 6         | 0        | 4         |
| 58        | 7         | 32        | 34        | 0        | 44        | 36        | 38       | 36        |
| 9         | 0         | 13        | 8         | 0        | 14        | 0         | 0        | 15        |
| 0         | 0         | 0         | 11        | 1366     | 22        | 0         | 6        | 0         |
| 0         | 0         | 0         | 3         | 0        | 0         | 0         | 0        | 0         |
| 11        | 0         | 10        | 11        | 0        | 13        | 0         | 0        | 0         |
| 8         | 69        | 8         | 131       | 34       | 9         | 112       | 0        | 42        |
| 38        | 33        | 65        | 58        | 14       | 140       | 9         | 4        | 55        |
| 190       | 2         | 23        | 127       | 0        | 157       | 23        | 43       | 205       |
| 6         | 51        | 17        | 10        | 228      | 3         | 7         | 0        | 4         |
| 0         | 84        | 0         | 0         | 0        | 0         | 0         | 0        | 0         |
| 0         | 7         | 0         | 0         | 66       | 0         | 32        | 0        | 11        |
| 2         | 62        | 0         | 32        | 6        | 3         | 9         | 0        | 0         |
| 7         | 56        | 0         | 0         | 19       | 0         | 44        | 0        | 0         |
| 44        | 139       | 90        | 736       | 473      | 20        | 99        | 364      | 93        |
| 5         | 2         | 4         | 0         | 0        | 41        | 12        | 0        | 41        |
| 15        | 18        | 27        | 24        | 54       | 77        | 2         | 0        | 9         |
| 3         | 17        | 0         | 0         | 35       | 0         | 6         | 0        | 0         |
| 0         | 0         | 0         | 0         | 0        | 0         | 0         | 0        | 0         |
| 73        | 0         | 13        | 0         | 0        | 144       | 0         | 4        | 0         |
| 107       | 0         | 0         | 80        | 0        | 0         | 0         | 0        | 0         |
| 0         | 0         | 4         | 0         | 0        | 3         | 0         | 0        | 11        |
| 0         | 8         | 2         | 0         | 2        | 0         | 0         | 268      | 22        |
| 8         | 4         | 154       | 58        | 9        | 23        | 0         | 30       | 0         |
| 10        | 78        | 0         | 4         | 0        | 3         | 792       | 0        | 92        |
| 17        | 44        | 34        | 14        | 6        | 19        | 40        | 0        | 97        |
| 17        | 0         | 12        | 19        | 0        | 0         | 46        | 0        | 182       |
| 0         | 36        | 0         | 6         | 152      | 0         | 85        | 0        | 25        |
| 0         | 2         | 0         | 0         | 186      | 0         | 0         | 0        | 0         |

|     |     |     |     |     |     |     |     |     |
|-----|-----|-----|-----|-----|-----|-----|-----|-----|
| 180 | 0   | 72  | 62  | 0   | 227 | 0   | 0   | 3   |
| 6   | 0   | 40  | 18  | 0   | 16  | 0   | 0   | 2   |
| 90  | 35  | 77  | 94  | 11  | 211 | 5   | 116 | 94  |
| 12  | 56  | 38  | 24  | 159 | 19  | 276 | 0   | 45  |
| 0   | 5   | 9   | 14  | 0   | 0   | 2   | 0   | 0   |
| 77  | 22  | 131 | 124 | 64  | 363 | 174 | 50  | 135 |
| 11  | 9   | 74  | 17  | 5   | 73  | 5   | 193 | 6   |
| 0   | 46  | 0   | 0   | 53  | 2   | 0   | 78  | 19  |
| 11  | 202 | 35  | 14  | 0   | 221 | 3   | 5   | 0   |
| 0   | 14  | 0   | 4   | 0   | 4   | 215 | 0   | 233 |
| 0   | 10  | 0   | 0   | 0   | 0   | 0   | 0   | 0   |
| 0   | 0   | 0   | 0   | 0   | 0   | 0   | 0   | 0   |
| 0   | 0   | 0   | 57  | 0   | 0   | 0   | 0   | 45  |
| 30  | 8   | 30  | 30  | 6   | 57  | 13  | 35  | 0   |
| 0   | 14  | 0   | 0   | 8   | 3   | 2   | 0   | 8   |
| 0   | 6   | 0   | 2   | 0   | 0   | 0   | 0   | 0   |
| 107 | 0   | 17  | 32  | 0   | 736 | 0   | 0   | 0   |
| 0   | 7   | 0   | 0   | 164 | 0   | 78  | 0   | 2   |
| 0   | 0   | 0   | 0   | 83  | 3   | 0   | 0   | 0   |
| 7   | 10  | 3   | 0   | 16  | 23  | 0   | 71  | 2   |
| 0   | 0   | 99  | 14  | 6   | 194 | 0   | 94  | 2   |
| 0   | 109 | 0   | 0   | 213 | 5   | 16  | 2   | 0   |
| 4   | 8   | 10  | 18  | 4   | 4   | 4   | 0   | 3   |
| 15  | 0   | 31  | 3   | 0   | 5   | 0   | 0   | 0   |
| 25  | 25  | 0   | 0   | 2   | 4   | 5   | 0   | 0   |
| 130 | 0   | 59  | 41  | 0   | 90  | 2   | 0   | 2   |
| 0   | 0   | 0   | 3   | 0   | 0   | 97  | 0   | 218 |
| 0   | 0   | 4   | 16  | 0   | 9   | 0   | 0   | 0   |
| 0   | 18  | 0   | 0   | 2   | 2   | 0   | 2   | 9   |
| 30  | 24  | 4   | 38  | 25  | 20  | 40  | 0   | 96  |
| 12  | 3   | 7   | 24  | 13  | 7   | 8   | 0   | 2   |
| 0   | 0   | 97  | 85  | 0   | 134 | 0   | 0   | 0   |
| 0   | 12  | 4   | 17  | 25  | 9   | 0   | 0   | 35  |
| 0   | 0   | 4   | 27  | 0   | 6   | 0   | 0   | 0   |
| 2   | 19  | 0   | 0   | 65  | 0   | 104 | 0   | 0   |
| 0   | 10  | 0   | 0   | 25  | 0   | 15  | 0   | 2   |
| 61  | 34  | 0   | 0   | 0   | 0   | 0   | 0   | 0   |
| 0   | 10  | 0   | 0   | 0   | 4   | 0   | 0   | 0   |
| 4   | 0   | 16  | 8   | 0   | 5   | 0   | 0   | 0   |
| 5   | 4   | 0   | 0   | 3   | 0   | 17  | 0   | 5   |
| 4   | 2   | 30  | 30  | 0   | 96  | 9   | 36  | 113 |
| 3   | 0   | 55  | 19  | 0   | 92  | 0   | 23  | 2   |
| 6   | 0   | 29  | 7   | 0   | 21  | 16  | 0   | 54  |
| 11  | 12  | 8   | 10  | 8   | 50  | 8   | 0   | 9   |
| 0   | 18  | 3   | 4   | 0   | 0   | 0   | 15  | 0   |
| 152 | 137 | 34  | 46  | 2   | 163 | 3   | 36  | 2   |
| 0   | 85  | 0   | 0   | 214 | 14  | 2   | 3   | 0   |
| 0   | 3   | 0   | 0   | 5   | 0   | 40  | 0   | 9   |
| 0   | 0   | 0   | 0   | 3   | 0   | 2   | 0   | 0   |
| 2   | 11  | 0   | 18  | 16  | 25  | 24  | 0   | 50  |

|      |     |     |     |     |      |     |      |    |
|------|-----|-----|-----|-----|------|-----|------|----|
| 108  | 0   | 48  | 3   | 0   | 130  | 0   | 0    | 0  |
| 21   | 2   | 92  | 57  | 0   | 67   | 5   | 7    | 6  |
| 2    | 5   | 2   | 27  | 107 | 55   | 7   | 0    | 2  |
| 15   | 23  | 5   | 8   | 21  | 98   | 0   | 237  | 55 |
| 0    | 0   | 0   | 0   | 0   | 9    | 0   | 0    | 0  |
| 0    | 6   | 0   | 0   | 2   | 0    | 0   | 9    | 0  |
| 0    | 0   | 7   | 96  | 0   | 9    | 0   | 0    | 0  |
| 1677 | 0   | 0   | 41  | 0   | 6484 | 0   | 0    | 0  |
| 43   | 2   | 383 | 331 | 88  | 1363 | 0   | 2213 | 0  |
| 41   | 0   | 0   | 0   | 0   | 0    | 0   | 0    | 2  |
| 0    | 91  | 0   | 0   | 0   | 0    | 3   | 0    | 0  |
| 0    | 0   | 0   | 3   | 0   | 0    | 89  | 0    | 15 |
| 3    | 5   | 4   | 8   | 25  | 0    | 15  | 6    | 12 |
| 0    | 0   | 0   | 0   | 0   | 0    | 0   | 0    | 0  |
| 0    | 55  | 0   | 0   | 24  | 0    | 0   | 0    | 0  |
| 5    | 75  | 14  | 5   | 43  | 9    | 4   | 0    | 21 |
| 7    | 35  | 22  | 20  | 4   | 14   | 7   | 0    | 22 |
| 0    | 0   | 0   | 0   | 0   | 0    | 0   | 0    | 0  |
| 0    | 0   | 0   | 12  | 0   | 0    | 10  | 0    | 0  |
| 11   | 492 | 42  | 45  | 359 | 11   | 179 | 0    | 32 |
| 0    | 0   | 0   | 4   | 10  | 0    | 0   | 0    | 0  |
| 2    | 29  | 4   | 14  | 60  | 15   | 45  | 0    | 97 |
| 61   | 11  | 42  | 0   | 0   | 0    | 0   | 0    | 0  |
| 0    | 0   | 0   | 0   | 0   | 0    | 0   | 0    | 0  |
| 0    | 22  | 0   | 0   | 27  | 0    | 8   | 15   | 0  |
| 0    | 3   | 34  | 21  | 4   | 9    | 18  | 10   | 65 |
| 0    | 0   | 0   | 0   | 4   | 0    | 0   | 0    | 0  |
| 8    | 0   | 30  | 17  | 6   | 64   | 2   | 23   | 14 |
| 0    | 0   | 10  | 0   | 0   | 0    | 0   | 6    | 0  |
| 13   | 0   | 0   | 0   | 0   | 32   | 0   | 0    | 0  |
| 0    | 132 | 0   | 0   | 0   | 2    | 0   | 3    | 0  |
| 33   | 0   | 0   | 0   | 0   | 55   | 0   | 0    | 0  |
| 11   | 0   | 0   | 0   | 3   | 67   | 8   | 0    | 60 |
| 0    | 85  | 0   | 0   | 0   | 0    | 0   | 0    | 0  |
| 0    | 2   | 0   | 0   | 0   | 0    | 0   | 0    | 0  |
| 0    | 0   | 26  | 10  | 0   | 39   | 0   | 0    | 8  |
| 95   | 0   | 35  | 309 | 0   | 68   | 2   | 0    | 0  |
| 0    | 78  | 0   | 0   | 0   | 0    | 0   | 0    | 0  |
| 0    | 0   | 28  | 21  | 0   | 17   | 0   | 0    | 0  |
| 0    | 0   | 0   | 0   | 0   | 0    | 2   | 0    | 2  |
| 0    | 23  | 0   | 0   | 0   | 0    | 0   | 0    | 0  |
| 0    | 0   | 0   | 0   | 0   | 0    | 0   | 0    | 0  |
| 0    | 2   | 0   | 0   | 0   | 0    | 0   | 0    | 0  |
| 2    | 7   | 2   | 0   | 9   | 5    | 6   | 0    | 7  |
| 4    | 0   | 39  | 18  | 0   | 167  | 0   | 54   | 0  |
| 20   | 0   | 12  | 0   | 0   | 49   | 0   | 0    | 0  |
| 119  | 7   | 106 | 116 | 0   | 208  | 21  | 0    | 90 |
| 0    | 0   | 0   | 2   | 0   | 3    | 0   | 0    | 0  |
| 17   | 0   | 0   | 0   | 0   | 49   | 0   | 0    | 0  |
| 2    | 0   | 2   | 2   | 0   | 5    | 2   | 0    | 13 |

|     |      |      |      |     |      |     |     |     |
|-----|------|------|------|-----|------|-----|-----|-----|
| 3   | 12   | 22   | 13   | 9   | 14   | 7   | 0   | 6   |
| 0   | 3    | 0    | 0    | 0   | 0    | 0   | 35  | 0   |
| 0   | 7    | 0    | 6    | 9   | 0    | 9   | 0   | 9   |
| 0   | 146  | 0    | 2    | 0   | 0    | 0   | 0   | 0   |
| 0   | 0    | 5    | 61   | 0   | 8    | 0   | 0   | 0   |
| 16  | 0    | 52   | 39   | 0   | 38   | 4   | 28  | 0   |
| 0   | 0    | 0    | 0    | 0   | 6    | 2   | 31  | 0   |
| 0   | 0    | 0    | 0    | 0   | 0    | 0   | 0   | 0   |
| 0   | 0    | 0    | 0    | 0   | 5    | 0   | 0   | 0   |
| 0   | 76   | 14   | 0    | 40  | 4    | 85  | 0   | 6   |
| 5   | 32   | 0    | 2    | 0   | 0    | 96  | 0   | 15  |
| 10  | 12   | 2    | 0    | 0   | 15   | 0   | 0   | 0   |
| 19  | 0    | 0    | 3    | 0   | 0    | 0   | 0   | 0   |
| 3   | 2    | 0    | 8    | 19  | 4    | 5   | 11  | 3   |
| 0   | 2    | 0    | 10   | 58  | 3    | 0   | 0   | 0   |
| 383 | 0    | 0    | 0    | 0   | 1058 | 0   | 0   | 0   |
| 0   | 0    | 0    | 4    | 0   | 0    | 12  | 0   | 10  |
| 0   | 0    | 0    | 0    | 0   | 0    | 0   | 58  | 0   |
| 311 | 27   | 1005 | 1503 | 13  | 5187 | 26  | 90  | 591 |
| 0   | 0    | 65   | 145  | 0   | 92   | 2   | 0   | 0   |
| 0   | 0    | 0    | 0    | 58  | 0    | 0   | 0   | 0   |
| 2   | 40   | 0    | 3    | 11  | 0    | 17  | 0   | 8   |
| 746 | 548  | 339  | 167  | 19  | 603  | 85  | 330 | 135 |
| 9   | 0    | 0    | 0    | 111 | 0    | 0   | 13  | 0   |
| 32  | 0    | 96   | 23   | 0   | 13   | 0   | 0   | 0   |
| 12  | 30   | 8    | 10   | 13  | 29   | 52  | 0   | 74  |
| 24  | 0    | 8    | 4    | 0   | 5    | 0   | 0   | 4   |
| 259 | 0    | 266  | 359  | 0   | 1666 | 0   | 0   | 4   |
| 2   | 8    | 2    | 0    | 308 | 0    | 317 | 0   | 0   |
| 31  | 67   | 63   | 190  | 76  | 223  | 56  | 11  | 72  |
| 0   | 24   | 0    | 0    | 11  | 223  | 0   | 15  | 0   |
| 105 | 0    | 0    | 40   | 2   | 263  | 0   | 0   | 6   |
| 0   | 4    | 6    | 0    | 0   | 3    | 6   | 0   | 0   |
| 42  | 0    | 10   | 101  | 0   | 193  | 0   | 0   | 0   |
| 4   | 2    | 0    | 15   | 0   | 4    | 0   | 0   | 0   |
| 0   | 13   | 0    | 0    | 110 | 0    | 146 | 0   | 0   |
| 24  | 116  | 0    | 17   | 0   | 0    | 0   | 7   | 0   |
| 0   | 1199 | 0    | 0    | 0   | 0    | 0   | 0   | 0   |
| 0   | 0    | 0    | 0    | 0   | 90   | 0   | 0   | 0   |
| 2   | 17   | 2    | 108  | 105 | 76   | 129 | 0   | 0   |
| 3   | 99   | 0    | 0    | 14  | 7    | 5   | 640 | 2   |
| 87  | 0    | 363  | 176  | 2   | 833  | 93  | 21  | 399 |
| 0   | 0    | 0    | 0    | 0   | 0    | 4   | 0   | 83  |
| 14  | 79   | 18   | 15   | 106 | 44   | 46  | 4   | 234 |
| 0   | 0    | 38   | 0    | 0   | 3    | 936 | 0   | 2   |
| 3   | 0    | 0    | 0    | 0   | 125  | 0   | 0   | 0   |
| 0   | 0    | 0    | 2    | 0   | 6    | 0   | 0   | 11  |
| 8   | 12   | 0    | 2    | 192 | 0    | 0   | 0   | 0   |
| 0   | 26   | 3    | 15   | 2   | 0    | 14  | 0   | 0   |
| 110 | 0    | 50   | 93   | 0   | 418  | 0   | 0   | 79  |



|     |     |     |      |     |      |     |     |     |
|-----|-----|-----|------|-----|------|-----|-----|-----|
| 2   | 0   | 0   | 7    | 0   | 0    | 91  | 0   | 11  |
| 0   | 0   | 0   | 0    | 0   | 0    | 0   | 0   | 0   |
| 25  | 0   | 0   | 4    | 0   | 29   | 2   | 0   | 0   |
| 0   | 29  | 0   | 1249 | 118 | 2    | 151 | 0   | 3   |
| 71  | 11  | 244 | 125  | 2   | 92   | 4   | 307 | 138 |
| 0   | 51  | 0   | 0    | 10  | 5    | 0   | 0   | 0   |
| 0   | 0   | 0   | 2    | 0   | 0    | 0   | 0   | 0   |
| 16  | 70  | 54  | 56   | 128 | 105  | 95  | 3   | 210 |
| 0   | 4   | 0   | 0    | 0   | 0    | 0   | 0   | 0   |
| 0   | 8   | 0   | 0    | 0   | 0    | 0   | 0   | 0   |
| 0   | 12  | 0   | 0    | 718 | 0    | 49  | 0   | 0   |
| 0   | 99  | 0   | 3    | 0   | 15   | 10  | 0   | 0   |
| 3   | 27  | 0   | 0    | 0   | 0    | 3   | 0   | 214 |
| 0   | 0   | 0   | 2    | 0   | 0    | 0   | 0   | 0   |
| 0   | 4   | 0   | 0    | 29  | 0    | 0   | 0   | 0   |
| 51  | 190 | 474 | 406  | 95  | 871  | 68  | 19  | 59  |
| 8   | 4   | 0   | 2    | 0   | 0    | 0   | 0   | 0   |
| 0   | 15  | 0   | 0    | 0   | 6    | 25  | 0   | 11  |
| 0   | 0   | 0   | 0    | 0   | 0    | 0   | 0   | 0   |
| 0   | 31  | 9   | 2    | 6   | 12   | 0   | 82  | 21  |
| 60  | 2   | 159 | 85   | 10  | 267  | 52  | 4   | 213 |
| 26  | 112 | 23  | 16   | 57  | 15   | 179 | 2   | 44  |
| 0   | 30  | 36  | 18   | 9   | 44   | 11  | 76  | 54  |
| 9   | 40  | 2   | 18   | 28  | 3    | 21  | 3   | 4   |
| 0   | 0   | 0   | 0    | 0   | 0    | 0   | 0   | 0   |
| 48  | 0   | 8   | 10   | 0   | 38   | 5   | 9   | 0   |
| 0   | 14  | 0   | 0    | 0   | 0    | 29  | 2   | 3   |
| 2   | 766 | 3   | 519  | 113 | 0    | 39  | 0   | 0   |
| 0   | 8   | 0   | 0    | 70  | 0    | 0   | 0   | 0   |
| 0   | 67  | 0   | 2    | 85  | 0    | 690 | 0   | 65  |
| 0   | 276 | 0   | 7    | 119 | 0    | 95  | 0   | 5   |
| 3   | 7   | 0   | 0    | 0   | 0    | 0   | 0   | 0   |
| 72  | 2   | 9   | 3    | 0   | 21   | 0   | 0   | 0   |
| 43  | 0   | 0   | 21   | 0   | 109  | 0   | 0   | 0   |
| 0   | 2   | 0   | 0    | 10  | 0    | 0   | 0   | 0   |
| 0   | 0   | 0   | 0    | 22  | 0    | 0   | 0   | 0   |
| 0   | 14  | 0   | 0    | 0   | 0    | 148 | 0   | 0   |
| 0   | 4   | 0   | 0    | 2   | 0    | 123 | 0   | 2   |
| 352 | 0   | 85  | 30   | 0   | 136  | 0   | 0   | 0   |
| 0   | 0   | 16  | 56   | 0   | 605  | 0   | 0   | 0   |
| 7   | 0   | 154 | 2    | 0   | 1166 | 0   | 0   | 0   |
| 4   | 0   | 6   | 5    | 0   | 3    | 0   | 0   | 37  |
| 0   | 0   | 0   | 0    | 0   | 0    | 0   | 0   | 0   |
| 4   | 71  | 10  | 9    | 26  | 10   | 2   | 0   | 0   |
| 0   | 0   | 0   | 0    | 0   | 0    | 0   | 0   | 0   |
| 0   | 0   | 36  | 68   | 0   | 21   | 0   | 0   | 8   |
| 21  | 0   | 14  | 0    | 0   | 2    | 0   | 967 | 0   |
| 0   | 130 | 0   | 17   | 0   | 0    | 0   | 0   | 0   |
| 21  | 315 | 12  | 27   | 341 | 9    | 36  | 499 | 495 |
| 10  | 0   | 99  | 75   | 0   | 443  | 15  | 0   | 41  |

|             |             |             |             |             |              |             |             |             |
|-------------|-------------|-------------|-------------|-------------|--------------|-------------|-------------|-------------|
| 27          | 0           | 344         | 205         | 0           | 549          | 3           | 0           | 78          |
| 185         | 35          | 161         | 0           | 3           | 5            | 0           | 0           | 0           |
| 14          | 16          | 3           | 4           | 34          | 0            | 204         | 0           | 2           |
| 0           | 363         | 0           | 0           | 0           | 0            | 0           | 0           | 0           |
| 0           | 304         | 0           | 0           | 68          | 0            | 0           | 2           | 0           |
| 71          | 24          | 156         | 94          | 22          | 397          | 6           | 50          | 95          |
| 120         | 8           | 157         | 180         | 2           | 434          | 2           | 97          | 21          |
| 5           | 7           | 5           | 75          | 19          | 89           | 0           | 2           | 10          |
| 0           | 20          | 4           | 0           | 21          | 46           | 0           | 1023        | 0           |
| 2           | 26          | 3           | 9           | 142         | 0            | 31          | 2           | 13          |
| 0           | 13          | 0           | 8           | 30          | 3            | 5           | 0           | 19          |
| 17          | 14          | 8           | 2           | 11          | 19           | 18          | 13          | 61          |
| 1540        | 0           | 477         | 332         | 0           | 855          | 2           | 0           | 0           |
| 45          | 54          | 87          | 107         | 40          | 133          | 7           | 3           | 80          |
| 0           | 9           | 0           | 0           | 4           | 0            | 0           | 0           | 0           |
| 0           | 0           | 4           | 0           | 0           | 0            | 9           | 0           | 4           |
| 13          | 0           | 0           | 2           | 0           | 0            | 0           | 0           | 289         |
| 0           | 0           | 0           | 0           | 0           | 0            | 0           | 0           | 0           |
| 381         | 69          | 17          | 55          | 0           | 223          | 13          | 17          | 0           |
| 0           | 0           | 9           | 0           | 0           | 0            | 42          | 0           | 152         |
| 20          | 123         | 54          | 50          | 0           | 49           | 0           | 10          | 0           |
| 5           | 0           | 6           | 6           | 12          | 36           | 0           | 194         | 22          |
| 0           | 0           | 10          | 0           | 0           | 0            | 0           | 0           | 0           |
| 0           | 0           | 0           | 2           | 9           | 0            | 2253        | 0           | 379         |
| 0           | 0           | 63          | 5           | 0           | 0            | 0           | 0           | 0           |
| 14          | 72          | 9           | 27          | 327         | 133          | 197         | 0           | 104         |
| 0           | 4           | 0           | 0           | 45          | 0            | 353         | 0           | 143         |
| 331         | 0           | 21          | 0           | 0           | 12           | 0           | 0           | 0           |
| 0           | 18          | 0           | 0           | 0           | 0            | 0           | 0           | 0           |
| 8           | 0           | 33          | 30          | 0           | 359          | 3           | 5           | 15          |
| 11          | 13          | 5           | 35          | 56          | 202          | 145         | 0           | 249         |
| 0           | 0           | 0           | 0           | 0           | 0            | 0           | 0           | 0           |
| 3           | 10          | 0           | 3           | 32          | 3            | 23          | 0           | 6           |
| 0           | 0           | 0           | 0           | 0           | 0            | 0           | 0           | 0           |
| <b>5936</b> | <b>6198</b> | <b>5504</b> | <b>7194</b> | <b>4145</b> | <b>18823</b> | <b>7397</b> | <b>4650</b> | <b>5118</b> |

| 324_wt_8_207_are_4 | 222_wt_12 | 197_wt_12 | 188_wt_4_203_are_1 | 192_are_1 | 353_wt_8_186_are_4 |     |     |     |
|--------------------|-----------|-----------|--------------------|-----------|--------------------|-----|-----|-----|
| 0                  | 17        | 0         | 0                  | 8         | 944                | 830 | 2   | 458 |
| 9                  | 41        | 26        | 8                  | 128       | 79                 | 60  | 0   | 572 |
| 0                  | 0         | 20        | 0                  | 6         | 0                  | 0   | 2   | 0   |
| 3                  | 16        | 39        | 22                 | 0         | 0                  | 0   | 2   | 0   |
| 24                 | 6         | 5         | 283                | 0         | 0                  | 2   | 2   | 0   |
| 0                  | 0         | 0         | 0                  | 0         | 225                | 310 | 0   | 0   |
| 25                 | 19        | 67        | 63                 | 79        | 6                  | 2   | 22  | 4   |
| 0                  | 0         | 0         | 0                  | 0         | 304                | 15  | 0   | 2   |
| 0                  | 0         | 0         | 0                  | 0         | 198                | 504 | 0   | 45  |
| 0                  | 0         | 0         | 0                  | 0         | 23                 | 35  | 0   | 13  |
| 0                  | 0         | 90        | 0                  | 0         | 0                  | 0   | 8   | 0   |
| 17                 | 59        | 29        | 3                  | 0         | 7                  | 0   | 46  | 0   |
| 0                  | 0         | 0         | 0                  | 0         | 0                  | 0   | 0   | 0   |
| 82                 | 19        | 86        | 12                 | 25        | 0                  | 7   | 31  | 0   |
| 5                  | 0         | 4         | 0                  | 0         | 0                  | 0   | 11  | 0   |
| 6                  | 15        | 0         | 0                  | 0         | 82                 | 103 | 0   | 40  |
| 116                | 0         | 0         | 28                 | 0         | 0                  | 2   | 0   | 207 |
| 0                  | 0         | 0         | 0                  | 0         | 0                  | 6   | 0   | 2   |
| 7                  | 8         | 76        | 40                 | 0         | 0                  | 0   | 33  | 0   |
| 0                  | 0         | 0         | 0                  | 0         | 0                  | 0   | 0   | 0   |
| 0                  | 37        | 0         | 0                  | 0         | 6                  | 40  | 0   | 17  |
| 5                  | 8         | 4         | 2                  | 48        | 29                 | 24  | 2   | 10  |
| 8                  | 69        | 4         | 2                  | 0         | 59                 | 42  | 0   | 23  |
| 0                  | 140       | 0         | 0                  | 0         | 69                 | 38  | 541 | 14  |
| 0                  | 0         | 0         | 0                  | 0         | 0                  | 0   | 0   | 0   |
| 8                  | 0         | 0         | 0                  | 0         | 30                 | 27  | 0   | 36  |
| 111                | 84        | 26        | 131                | 53        | 8                  | 8   | 76  | 4   |
| 49                 | 18        | 160       | 31                 | 18        | 16                 | 11  | 37  | 65  |
| 32                 | 85        | 66        | 17                 | 93        | 72                 | 43  | 7   | 4   |
| 75                 | 145       | 92        | 87                 | 69        | 0                  | 3   | 16  | 29  |
| 0                  | 82        | 0         | 0                  | 0         | 0                  | 0   | 2   | 0   |
| 15                 | 43        | 34        | 105                | 51        | 0                  | 0   | 12  | 0   |
| 39                 | 35        | 11        | 12                 | 0         | 7                  | 2   | 12  | 0   |
| 27                 | 2         | 93        | 113                | 40        | 0                  | 0   | 16  | 0   |
| 465                | 427       | 279       | 549                | 78        | 182                | 114 | 535 | 175 |
| 25                 | 2         | 3         | 0                  | 0         | 49                 | 19  | 2   | 32  |
| 26                 | 10        | 5         | 4                  | 0         | 20                 | 76  | 27  | 0   |
| 5                  | 6         | 9         | 0                  | 0         | 0                  | 5   | 16  | 2   |
| 0                  | 0         | 0         | 0                  | 0         | 167                | 27  | 0   | 0   |
| 0                  | 0         | 0         | 0                  | 0         | 3                  | 30  | 0   | 119 |
| 0                  | 0         | 0         | 0                  | 0         | 0                  | 0   | 0   | 0   |
| 9                  | 7         | 0         | 2                  | 0         | 22                 | 25  | 0   | 0   |
| 0                  | 8         | 0         | 4                  | 0         | 0                  | 0   | 0   | 2   |
| 19                 | 5         | 91        | 22                 | 60        | 23                 | 7   | 11  | 11  |
| 3                  | 162       | 7         | 317                | 0         | 34                 | 0   | 16  | 22  |
| 54                 | 40        | 16        | 26                 | 24        | 25                 | 21  | 12  | 19  |
| 24                 | 2         | 0         | 0                  | 0         | 4                  | 11  | 0   | 21  |
| 15                 | 56        | 47        | 2                  | 0         | 2                  | 13  | 42  | 0   |
| 15                 | 0         | 15        | 0                  | 0         | 0                  | 0   | 89  | 0   |

|     |     |     |     |     |     |     |     |     |
|-----|-----|-----|-----|-----|-----|-----|-----|-----|
| 0   | 0   | 0   | 0   | 0   | 55  | 55  | 0   | 67  |
| 17  | 17  | 0   | 0   | 0   | 14  | 3   | 0   | 0   |
| 25  | 20  | 67  | 6   | 3   | 104 | 129 | 4   | 69  |
| 108 | 33  | 70  | 239 | 7   | 6   | 2   | 73  | 28  |
| 71  | 0   | 8   | 9   | 0   | 6   | 9   | 19  | 0   |
| 75  | 43  | 405 | 98  | 22  | 355 | 96  | 38  | 122 |
| 28  | 9   | 147 | 44  | 35  | 31  | 13  | 14  | 6   |
| 8   | 13  | 79  | 74  | 9   | 0   | 0   | 57  | 0   |
| 17  | 0   | 48  | 0   | 0   | 20  | 29  | 4   | 0   |
| 7   | 0   | 4   | 0   | 0   | 0   | 2   | 5   | 3   |
| 2   | 0   | 0   | 0   | 0   | 0   | 0   | 0   | 0   |
| 21  | 0   | 0   | 0   | 0   | 0   | 0   | 0   | 0   |
| 0   | 0   | 0   | 0   | 0   | 23  | 51  | 0   | 0   |
| 42  | 16  | 39  | 11  | 7   | 12  | 2   | 32  | 79  |
| 5   | 0   | 9   | 0   | 4   | 0   | 0   | 16  | 2   |
| 0   | 0   | 0   | 0   | 0   | 0   | 0   | 0   | 0   |
| 15  | 40  | 0   | 0   | 6   | 11  | 23  | 0   | 69  |
| 0   | 2   | 10  | 55  | 37  | 0   | 0   | 4   | 0   |
| 0   | 0   | 42  | 0   | 0   | 0   | 0   | 2   | 0   |
| 15  | 0   | 17  | 7   | 0   | 8   | 0   | 16  | 5   |
| 28  | 5   | 97  | 18  | 98  | 5   | 10  | 8   | 18  |
| 27  | 210 | 89  | 128 | 136 | 0   | 0   | 16  | 0   |
| 28  | 3   | 43  | 48  | 9   | 2   | 0   | 5   | 0   |
| 0   | 0   | 0   | 0   | 0   | 0   | 0   | 0   | 0   |
| 0   | 56  | 7   | 186 | 6   | 0   | 2   | 3   | 2   |
| 15  | 2   | 0   | 0   | 0   | 4   | 0   | 4   | 6   |
| 37  | 144 | 0   | 0   | 0   | 9   | 4   | 0   | 2   |
| 0   | 0   | 0   | 0   | 0   | 10  | 6   | 0   | 19  |
| 4   | 2   | 143 | 0   | 8   | 0   | 0   | 12  | 0   |
| 65  | 4   | 102 | 50  | 0   | 19  | 19  | 16  | 5   |
| 5   | 7   | 8   | 26  | 4   | 2   | 10  | 0   | 2   |
| 0   | 0   | 0   | 0   | 0   | 49  | 85  | 0   | 0   |
| 0   | 10  | 32  | 0   | 0   | 21  | 14  | 0   | 3   |
| 0   | 0   | 0   | 0   | 0   | 0   | 5   | 0   | 0   |
| 0   | 36  | 30  | 140 | 68  | 2   | 0   | 26  | 0   |
| 0   | 0   | 19  | 3   | 0   | 0   | 0   | 13  | 0   |
| 118 | 0   | 14  | 0   | 0   | 0   | 0   | 4   | 0   |
| 0   | 3   | 7   | 27  | 0   | 0   | 0   | 0   | 0   |
| 6   | 0   | 29  | 0   | 0   | 5   | 3   | 29  | 0   |
| 16  | 0   | 18  | 40  | 0   | 0   | 0   | 5   | 0   |
| 6   | 4   | 27  | 0   | 23  | 7   | 6   | 0   | 29  |
| 11  | 0   | 10  | 15  | 29  | 4   | 15  | 0   | 27  |
| 20  | 15  | 3   | 0   | 2   | 12  | 7   | 4   | 41  |
| 3   | 12  | 40  | 22  | 29  | 6   | 7   | 17  | 9   |
| 63  | 0   | 2   | 31  | 0   | 0   | 9   | 36  | 0   |
| 36  | 4   | 305 | 16  | 0   | 39  | 20  | 10  | 37  |
| 0   | 35  | 37  | 0   | 32  | 17  | 32  | 135 | 5   |
| 0   | 0   | 4   | 30  | 0   | 0   | 0   | 4   | 2   |
| 0   | 0   | 0   | 0   | 0   | 0   | 0   | 6   | 0   |
| 34  | 20  | 9   | 39  | 11  | 20  | 7   | 12  | 25  |

|     |     |      |     |     |     |     |     |     |
|-----|-----|------|-----|-----|-----|-----|-----|-----|
| 0   | 0   | 0    | 0   | 0   | 35  | 93  | 0   | 0   |
| 13  | 2   | 22   | 9   | 0   | 18  | 12  | 14  | 4   |
| 6   | 2   | 21   | 57  | 2   | 35  | 14  | 10  | 6   |
| 36  | 9   | 65   | 42  | 46  | 6   | 8   | 41  | 8   |
| 0   | 0   | 0    | 0   | 0   | 18  | 16  | 0   | 0   |
| 37  | 0   | 11   | 0   | 19  | 0   | 0   | 5   | 0   |
| 0   | 0   | 0    | 0   | 0   | 12  | 22  | 0   | 37  |
| 2   | 0   | 0    | 0   | 0   | 15  | 99  | 0   | 0   |
| 473 | 0   | 2198 | 0   | 499 | 151 | 40  | 183 | 0   |
| 0   | 0   | 0    | 0   | 0   | 0   | 0   | 0   | 14  |
| 0   | 2   | 0    | 8   | 0   | 0   | 0   | 2   | 0   |
| 7   | 22  | 0    | 0   | 0   | 7   | 5   | 0   | 0   |
| 24  | 18  | 3    | 5   | 6   | 4   | 6   | 29  | 12  |
| 0   | 0   | 0    | 0   | 0   | 0   | 0   | 0   | 0   |
| 0   | 0   | 18   | 0   | 0   | 0   | 0   | 6   | 0   |
| 16  | 2   | 33   | 21  | 2   | 11  | 0   | 25  | 6   |
| 10  | 0   | 24   | 37  | 75  | 18  | 19  | 12  | 7   |
| 0   | 22  | 0    | 0   | 0   | 0   | 0   | 0   | 0   |
| 0   | 27  | 46   | 0   | 0   | 0   | 0   | 0   | 12  |
| 183 | 136 | 173  | 437 | 81  | 8   | 15  | 172 | 11  |
| 0   | 0   | 0    | 0   | 0   | 0   | 0   | 0   | 0   |
| 57  | 18  | 37   | 4   | 0   | 0   | 2   | 47  | 27  |
| 101 | 146 | 0    | 0   | 0   | 9   | 0   | 48  | 0   |
| 0   | 0   | 0    | 0   | 0   | 0   | 0   | 0   | 0   |
| 10  | 0   | 33   | 0   | 0   | 0   | 0   | 20  | 0   |
| 30  | 27  | 13   | 16  | 42  | 13  | 27  | 18  | 11  |
| 0   | 0   | 26   | 0   | 0   | 0   | 0   | 0   | 0   |
| 35  | 15  | 82   | 7   | 18  | 11  | 8   | 20  | 8   |
| 21  | 0   | 0    | 0   | 0   | 0   | 0   | 0   | 0   |
| 0   | 0   | 0    | 0   | 0   | 0   | 0   | 0   | 8   |
| 0   | 146 | 573  | 0   | 0   | 0   | 2   | 147 | 0   |
| 0   | 0   | 0    | 0   | 0   | 18  | 0   | 0   | 0   |
| 0   | 0   | 0    | 0   | 0   | 4   | 0   | 0   | 0   |
| 0   | 0   | 24   | 13  | 0   | 0   | 0   | 0   | 0   |
| 0   | 0   | 10   | 0   | 0   | 0   | 0   | 4   | 0   |
| 3   | 0   | 0    | 0   | 0   | 3   | 6   | 0   | 12  |
| 0   | 0   | 0    | 0   | 0   | 771 | 499 | 0   | 0   |
| 3   | 0   | 0    | 0   | 0   | 17  | 3   | 0   | 0   |
| 0   | 0   | 0    | 0   | 0   | 29  | 26  | 0   | 28  |
| 7   | 0   | 3    | 0   | 0   | 0   | 0   | 0   | 0   |
| 39  | 0   | 13   | 0   | 0   | 0   | 0   | 2   | 0   |
| 0   | 2   | 0    | 0   | 0   | 11  | 0   | 0   | 0   |
| 0   | 0   | 0    | 0   | 0   | 0   | 0   | 0   | 0   |
| 22  | 51  | 49   | 47  | 48  | 0   | 0   | 10  | 2   |
| 17  | 2   | 68   | 0   | 19  | 6   | 8   | 4   | 3   |
| 0   | 0   | 0    | 0   | 0   | 0   | 0   | 0   | 0   |
| 64  | 24  | 16   | 2   | 5   | 159 | 156 | 2   | 150 |
| 0   | 0   | 0    | 0   | 0   | 0   | 8   | 0   | 0   |
| 0   | 0   | 0    | 0   | 0   | 3   | 13  | 0   | 0   |
| 3   | 0   | 2    | 0   | 0   | 12  | 5   | 6   | 61  |

|     |     |     |      |     |     |     |    |     |
|-----|-----|-----|------|-----|-----|-----|----|-----|
| 16  | 22  | 6   | 69   | 2   | 0   | 2   | 5  | 7   |
| 341 | 0   | 4   | 35   | 5   | 0   | 0   | 54 | 0   |
| 24  | 18  | 8   | 0    | 25  | 0   | 0   | 6  | 0   |
| 0   | 142 | 33  | 0    | 0   | 0   | 0   | 0  | 0   |
| 0   | 0   | 0   | 0    | 0   | 3   | 118 | 2  | 0   |
| 33  | 9   | 0   | 0    | 0   | 9   | 8   | 11 | 25  |
| 0   | 0   | 0   | 0    | 4   | 0   | 0   | 0  | 54  |
| 0   | 0   | 0   | 0    | 0   | 0   | 0   | 0  | 0   |
| 0   | 12  | 0   | 0    | 0   | 0   | 0   | 0  | 53  |
| 115 | 4   | 49  | 242  | 69  | 0   | 2   | 33 | 9   |
| 14  | 8   | 138 | 8    | 2   | 2   | 0   | 19 | 0   |
| 28  | 0   | 6   | 0    | 0   | 4   | 17  | 13 | 0   |
| 515 | 43  | 59  | 0    | 0   | 0   | 0   | 0  | 0   |
| 6   | 4   | 38  | 11   | 3   | 0   | 4   | 22 | 0   |
| 0   | 2   | 0   | 6    | 0   | 0   | 0   | 0  | 0   |
| 0   | 0   | 0   | 0    | 0   | 178 | 63  | 2  | 0   |
| 0   | 0   | 0   | 0    | 0   | 663 | 208 | 0  | 3   |
| 0   | 0   | 3   | 0    | 0   | 0   | 0   | 0  | 0   |
| 112 | 42  | 49  | 34   | 173 | 849 | 697 | 18 | 368 |
| 0   | 0   | 0   | 0    | 0   | 184 | 55  | 0  | 0   |
| 0   | 3   | 9   | 0    | 0   | 0   | 36  | 2  | 0   |
| 3   | 16  | 10  | 12   | 13  | 0   | 0   | 15 | 26  |
| 4   | 22  | 194 | 16   | 96  | 103 | 85  | 12 | 206 |
| 0   | 0   | 0   | 1026 | 6   | 0   | 0   | 2  | 0   |
| 0   | 0   | 0   | 0    | 0   | 76  | 8   | 0  | 0   |
| 68  | 8   | 59  | 26   | 2   | 29  | 30  | 12 | 46  |
| 2   | 2   | 0   | 0    | 0   | 9   | 22  | 0  | 48  |
| 50  | 0   | 0   | 0    | 49  | 251 | 303 | 11 | 104 |
| 28  | 0   | 14  | 14   | 0   | 5   | 0   | 24 | 47  |
| 214 | 115 | 64  | 175  | 17  | 258 | 84  | 68 | 67  |
| 64  | 0   | 27  | 795  | 0   | 3   | 0   | 37 | 0   |
| 0   | 0   | 0   | 0    | 0   | 56  | 84  | 0  | 0   |
| 0   | 3   | 2   | 0    | 0   | 0   | 0   | 13 | 0   |
| 0   | 0   | 0   | 0    | 0   | 158 | 0   | 0  | 74  |
| 57  | 426 | 4   | 0    | 0   | 2   | 3   | 0  | 0   |
| 68  | 0   | 42  | 58   | 0   | 0   | 0   | 6  | 20  |
| 0   | 0   | 52  | 0    | 0   | 0   | 0   | 0  | 0   |
| 0   | 882 | 0   | 0    | 0   | 0   | 0   | 0  | 0   |
| 0   | 0   | 0   | 0    | 0   | 0   | 0   | 0  | 0   |
| 14  | 39  | 27  | 97   | 0   | 32  | 2   | 34 | 0   |
| 2   | 17  | 127 | 23   | 78  | 0   | 0   | 13 | 0   |
| 210 | 63  | 511 | 90   | 459 | 89  | 63  | 70 | 218 |
| 0   | 0   | 0   | 0    | 22  | 0   | 0   | 0  | 0   |
| 39  | 108 | 61  | 85   | 163 | 0   | 14  | 43 | 44  |
| 15  | 0   | 0   | 0    | 0   | 2   | 18  | 0  | 114 |
| 0   | 0   | 0   | 0    | 0   | 0   | 2   | 0  | 32  |
| 0   | 0   | 0   | 0    | 0   | 9   | 7   | 0  | 83  |
| 7   | 8   | 4   | 6    | 27  | 0   | 3   | 0  | 0   |
| 13  | 21  | 17  | 0    | 21  | 0   | 3   | 4  | 0   |
| 5   | 0   | 0   | 0    | 14  | 54  | 82  | 0  | 151 |

|     |     |      |      |     |     |     |     |     |
|-----|-----|------|------|-----|-----|-----|-----|-----|
| 0   | 0   | 0    | 0    | 0   | 0   | 3   | 0   | 0   |
| 0   | 0   | 0    | 0    | 0   | 0   | 0   | 0   | 0   |
| 0   | 0   | 0    | 0    | 0   | 24  | 17  | 0   | 0   |
| 0   | 437 | 4    | 11   | 224 | 16  | 47  | 3   | 29  |
| 19  | 7   | 13   | 10   | 2   | 18  | 58  | 16  | 91  |
| 0   | 0   | 16   | 0    | 33  | 0   | 0   | 22  | 0   |
| 0   | 0   | 0    | 3    | 0   | 4   | 0   | 0   | 0   |
| 87  | 75  | 124  | 88   | 44  | 31  | 9   | 59  | 152 |
| 0   | 0   | 0    | 0    | 0   | 0   | 0   | 0   | 0   |
| 0   | 0   | 0    | 0    | 0   | 0   | 0   | 5   | 0   |
| 554 | 0   | 349  | 16   | 98  | 0   | 0   | 285 | 2   |
| 0   | 11  | 117  | 0    | 0   | 0   | 0   | 0   | 7   |
| 0   | 2   | 2    | 44   | 0   | 2   | 0   | 0   | 51  |
| 2   | 0   | 0    | 0    | 0   | 0   | 0   | 0   | 10  |
| 0   | 0   | 3    | 0    | 0   | 0   | 0   | 0   | 0   |
| 189 | 271 | 1526 | 159  | 597 | 49  | 151 | 237 | 328 |
| 0   | 0   | 0    | 0    | 0   | 0   | 0   | 0   | 0   |
| 8   | 6   | 55   | 74   | 0   | 0   | 6   | 0   | 0   |
| 53  | 0   | 0    | 0    | 0   | 0   | 0   | 0   | 12  |
| 5   | 7   | 19   | 0    | 25  | 2   | 4   | 4   | 12  |
| 23  | 136 | 11   | 4    | 17  | 158 | 86  | 15  | 114 |
| 118 | 7   | 198  | 129  | 122 | 7   | 4   | 36  | 2   |
| 16  | 109 | 119  | 15   | 0   | 11  | 9   | 37  | 129 |
| 15  | 11  | 18   | 22   | 3   | 5   | 0   | 9   | 3   |
| 0   | 0   | 0    | 0    | 0   | 0   | 0   | 0   | 0   |
| 0   | 4   | 0    | 0    | 24  | 24  | 302 | 0   | 119 |
| 3   | 2   | 40   | 16   | 0   | 0   | 0   | 8   | 0   |
| 748 | 171 | 331  | 483  | 668 | 402 | 8   | 0   | 5   |
| 7   | 0   | 4    | 0    | 0   | 2   | 0   | 6   | 0   |
| 55  | 9   | 49   | 275  | 63  | 0   | 0   | 60  | 0   |
| 44  | 81  | 111  | 23   | 149 | 0   | 0   | 43  | 0   |
| 0   | 9   | 4    | 18   | 0   | 0   | 0   | 17  | 0   |
| 0   | 10  | 0    | 0    | 0   | 2   | 2   | 0   | 19  |
| 0   | 0   | 0    | 0    | 0   | 98  | 193 | 0   | 0   |
| 2   | 2   | 10   | 2    | 0   | 0   | 0   | 6   | 0   |
| 0   | 7   | 5    | 0    | 4   | 13  | 0   | 191 | 19  |
| 0   | 0   | 11   | 0    | 0   | 0   | 0   | 0   | 12  |
| 5   | 2   | 8    | 68   | 0   | 0   | 0   | 0   | 0   |
| 14  | 0   | 9    | 7    | 0   | 242 | 576 | 0   | 2   |
| 0   | 0   | 0    | 0    | 0   | 48  | 95  | 0   | 25  |
| 0   | 6   | 0    | 0    | 0   | 21  | 40  | 0   | 2   |
| 15  | 65  | 0    | 0    | 0   | 118 | 2   | 35  | 15  |
| 0   | 0   | 0    | 1127 | 0   | 0   | 0   | 0   | 0   |
| 26  | 45  | 32   | 54   | 28  | 3   | 5   | 36  | 0   |
| 0   | 0   | 0    | 0    | 0   | 0   | 0   | 4   | 0   |
| 16  | 23  | 0    | 0    | 0   | 18  | 46  | 12  | 61  |
| 0   | 0   | 14   | 32   | 4   | 0   | 0   | 26  | 9   |
| 96  | 6   | 39   | 43   | 0   | 68  | 0   | 0   | 0   |
| 12  | 31  | 1220 | 70   | 75  | 7   | 29  | 161 | 0   |
| 0   | 3   | 0    | 0    | 0   | 59  | 29  | 0   | 76  |

|             |             |             |             |             |             |             |             |             |
|-------------|-------------|-------------|-------------|-------------|-------------|-------------|-------------|-------------|
| 0           | 7           | 0           | 0           | 0           | 66          | 56          | 0           | 71          |
| 365         | 641         | 3           | 0           | 0           | 28          | 0           | 228         | 0           |
| 36          | 17          | 28          | 177         | 2           | 2           | 4           | 37          | 0           |
| 0           | 0           | 127         | 110         | 0           | 0           | 0           | 0           | 0           |
| 0           | 0           | 192         | 0           | 0           | 0           | 0           | 0           | 0           |
| 36          | 12          | 42          | 60          | 37          | 25          | 45          | 9           | 73          |
| 133         | 0           | 279         | 56          | 78          | 127         | 84          | 66          | 25          |
| 40          | 47          | 33          | 39          | 18          | 7           | 0           | 13          | 21          |
| 58          | 3           | 723         | 19          | 0           | 0           | 0           | 70          | 0           |
| 7           | 12          | 122         | 196         | 26          | 0           | 0           | 22          | 2           |
| 125         | 115         | 30          | 36          | 4           | 2           | 0           | 27          | 2           |
| 8           | 12          | 14          | 2           | 80          | 0           | 0           | 6           | 40          |
| 42          | 6           | 0           | 0           | 0           | 289         | 144         | 0           | 2           |
| 96          | 21          | 56          | 16          | 22          | 117         | 35          | 31          | 101         |
| 52          | 0           | 6           | 71          | 0           | 0           | 0           | 25          | 0           |
| 0           | 21          | 0           | 20          | 0           | 0           | 0           | 20          | 0           |
| 0           | 0           | 0           | 0           | 0           | 150         | 197         | 0           | 6           |
| 0           | 0           | 0           | 0           | 0           | 0           | 0           | 0           | 0           |
| 99          | 4           | 418         | 24          | 2           | 107         | 31          | 9           | 27          |
| 0           | 0           | 0           | 0           | 0           | 100         | 14          | 0           | 93          |
| 119         | 0           | 37          | 90          | 0           | 4           | 3           | 61          | 0           |
| 0           | 4           | 11          | 0           | 26          | 0           | 2           | 2           | 5           |
| 0           | 0           | 9           | 0           | 0           | 0           | 0           | 0           | 0           |
| 0           | 2411        | 0           | 0           | 0           | 0           | 0           | 0           | 386         |
| 47          | 9           | 0           | 0           | 0           | 0           | 0           | 0           | 0           |
| 92          | 92          | 44          | 250         | 52          | 36          | 21          | 60          | 144         |
| 0           | 24          | 3           | 0           | 0           | 0           | 0           | 0           | 0           |
| 0           | 0           | 0           | 0           | 0           | 0           | 0           | 0           | 0           |
| 0           | 0           | 2           | 0           | 0           | 0           | 0           | 0           | 0           |
| 7           | 20          | 5           | 3           | 29          | 10          | 15          | 0           | 23          |
| 9           | 3           | 16          | 118         | 3           | 16          | 9           | 6           | 10          |
| 0           | 0           | 0           | 0           | 0           | 0           | 2           | 0           | 0           |
| 7           | 17          | 7           | 40          | 10          | 0           | 0           | 20          | 6           |
| 0           | 0           | 0           | 0           | 0           | 0           | 0           | 0           | 0           |
| <b>5196</b> | <b>7052</b> | <b>8267</b> | <b>6844</b> | <b>3787</b> | <b>5566</b> | <b>4404</b> | <b>2531</b> | <b>4135</b> |





|     |     |      |     |      |    |     |     |     |
|-----|-----|------|-----|------|----|-----|-----|-----|
| 0   | 0   | 0    | 0   | 0    | 0  | 0   | 0   | 0   |
| 53  | 201 | 0    | 0   | 30   | 25 | 0   | 0   | 0   |
| 16  | 26  | 0    | 196 | 88   | 55 | 4   | 34  | 10  |
| 12  | 45  | 359  | 82  | 68   | 34 | 49  | 74  | 31  |
| 0   | 29  | 0    | 4   | 0    | 0  | 0   | 0   | 3   |
| 39  | 58  | 0    | 206 | 44   | 11 | 174 | 186 | 46  |
| 17  | 75  | 2    | 153 | 25   | 11 | 4   | 42  | 11  |
| 0   | 2   | 19   | 45  | 18   | 0  | 0   | 370 | 13  |
| 0   | 31  | 0    | 39  | 0    | 58 | 17  | 0   | 0   |
| 151 | 0   | 32   | 0   | 15   | 0  | 0   | 0   | 0   |
| 0   | 0   | 0    | 0   | 0    | 8  | 0   | 0   | 0   |
| 0   | 0   | 0    | 0   | 0    | 0  | 0   | 0   | 0   |
| 0   | 0   | 0    | 0   | 0    | 15 | 0   | 0   | 0   |
| 19  | 59  | 0    | 25  | 8    | 0  | 34  | 5   | 3   |
| 22  | 9   | 11   | 6   | 2    | 0  | 2   | 13  | 27  |
| 0   | 2   | 16   | 2   | 0    | 3  | 0   | 5   | 0   |
| 3   | 45  | 0    | 0   | 15   | 16 | 0   | 0   | 0   |
| 0   | 6   | 83   | 0   | 0    | 4  | 2   | 0   | 28  |
| 43  | 48  | 4    | 0   | 0    | 0  | 9   | 33  | 0   |
| 0   | 60  | 0    | 14  | 5    | 7  | 0   | 78  | 0   |
| 0   | 8   | 0    | 67  | 0    | 15 | 0   | 158 | 22  |
| 13  | 41  | 59   | 6   | 2    | 5  | 32  | 97  | 135 |
| 0   | 29  | 8    | 8   | 0    | 7  | 0   | 4   | 5   |
| 0   | 0   | 0    | 0   | 0    | 0  | 0   | 0   | 0   |
| 11  | 58  | 0    | 0   | 6    | 16 | 24  | 6   | 0   |
| 9   | 81  | 0    | 0   | 0    | 0  | 68  | 0   | 0   |
| 0   | 0   | 0    | 0   | 0    | 0  | 0   | 0   | 0   |
| 5   | 10  | 0    | 0   | 0    | 0  | 0   | 0   | 0   |
| 8   | 61  | 2    | 46  | 0    | 0  | 2   | 9   | 7   |
| 2   | 143 | 74   | 32  | 13   | 0  | 0   | 5   | 0   |
| 7   | 7   | 15   | 7   | 10   | 7  | 3   | 5   | 7   |
| 0   | 0   | 0    | 0   | 0    | 0  | 0   | 0   | 0   |
| 23  | 6   | 3    | 4   | 15   | 3  | 15  | 7   | 0   |
| 0   | 0   | 0    | 0   | 0    | 0  | 0   | 0   | 0   |
| 0   | 23  | 88   | 10  | 0    | 2  | 450 | 2   | 2   |
| 0   | 2   | 21   | 0   | 0    | 0  | 42  | 0   | 0   |
| 0   | 7   | 0    | 0   | 0    | 0  | 0   | 0   | 0   |
| 0   | 14  | 38   | 0   | 0    | 0  | 0   | 8   | 0   |
| 0   | 0   | 0    | 0   | 2    | 0  | 0   | 0   | 0   |
| 0   | 2   | 0    | 0   | 0    | 0  | 4   | 0   | 0   |
| 45  | 18  | 0    | 10  | 2    | 30 | 14  | 2   | 3   |
| 35  | 6   | 0    | 0   | 26   | 28 | 0   | 22  | 9   |
| 63  | 41  | 0    | 16  | 2    | 26 | 84  | 0   | 0   |
| 0   | 43  | 3    | 33  | 9    | 7  | 26  | 35  | 22  |
| 0   | 6   | 0    | 3   | 0    | 0  | 0   | 0   | 0   |
| 106 | 130 | 6    | 42  | 16   | 48 | 89  | 7   | 0   |
| 0   | 33  | 1561 | 7   | 1349 | 77 | 126 | 6   | 0   |
| 3   | 5   | 123  | 2   | 0    | 0  | 46  | 0   | 0   |
| 0   | 0   | 0    | 0   | 0    | 0  | 0   | 0   | 0   |
| 14  | 19  | 32   | 37  | 7    | 4  | 16  | 17  | 39  |

|     |      |     |     |     |     |     |     |     |
|-----|------|-----|-----|-----|-----|-----|-----|-----|
| 0   | 0    | 0   | 0   | 0   | 3   | 0   | 0   | 0   |
| 94  | 55   | 0   | 14  | 2   | 38  | 32  | 0   | 5   |
| 0   | 33   | 33  | 0   | 42  | 0   | 22  | 40  | 0   |
| 3   | 60   | 2   | 127 | 9   | 13  | 7   | 73  | 40  |
| 0   | 0    | 0   | 0   | 0   | 0   | 0   | 0   | 0   |
| 0   | 35   | 2   | 43  | 36  | 0   | 27  | 69  | 11  |
| 0   | 2    | 0   | 0   | 0   | 22  | 0   | 0   | 0   |
| 0   | 0    | 0   | 0   | 0   | 0   | 0   | 0   | 0   |
| 6   | 1204 | 20  | 684 | 41  | 41  | 0   | 0   | 507 |
| 6   | 0    | 0   | 0   | 0   | 13  | 2   | 0   | 0   |
| 0   | 14   | 2   | 0   | 19  | 0   | 0   | 3   | 0   |
| 0   | 11   | 0   | 0   | 2   | 0   | 0   | 0   | 0   |
| 0   | 16   | 16  | 20  | 0   | 4   | 0   | 12  | 14  |
| 0   | 0    | 0   | 0   | 0   | 4   | 0   | 0   | 0   |
| 0   | 2    | 91  | 0   | 0   | 0   | 72  | 0   | 0   |
| 12  | 19   | 10  | 17  | 27  | 0   | 23  | 50  | 0   |
| 15  | 34   | 9   | 22  | 65  | 6   | 0   | 0   | 12  |
| 0   | 0    | 0   | 0   | 0   | 0   | 9   | 2   | 0   |
| 0   | 3    | 19  | 35  | 18  | 0   | 0   | 0   | 0   |
| 58  | 448  | 37  | 63  | 103 | 21  | 591 | 299 | 405 |
| 0   | 0    | 0   | 0   | 0   | 0   | 0   | 0   | 0   |
| 33  | 15   | 105 | 35  | 11  | 4   | 8   | 61  | 33  |
| 0   | 0    | 0   | 144 | 0   | 0   | 0   | 0   | 0   |
| 0   | 0    | 0   | 0   | 0   | 0   | 0   | 0   | 0   |
| 0   | 0    | 0   | 27  | 0   | 0   | 51  | 43  | 2   |
| 10  | 60   | 4   | 56  | 33  | 24  | 44  | 32  | 49  |
| 0   | 0    | 0   | 0   | 0   | 0   | 0   | 0   | 0   |
| 14  | 42   | 0   | 40  | 27  | 20  | 32  | 32  | 23  |
| 0   | 2    | 0   | 0   | 0   | 0   | 0   | 0   | 0   |
| 2   | 0    | 0   | 0   | 0   | 82  | 0   | 0   | 0   |
| 0   | 0    | 247 | 35  | 2   | 0   | 2   | 0   | 0   |
| 0   | 0    | 0   | 0   | 0   | 2   | 0   | 0   | 0   |
| 0   | 0    | 0   | 0   | 5   | 0   | 0   | 73  | 25  |
| 0   | 3    | 0   | 0   | 7   | 0   | 0   | 0   | 0   |
| 0   | 0    | 0   | 0   | 0   | 0   | 0   | 0   | 0   |
| 0   | 0    | 0   | 0   | 0   | 10  | 0   | 2   | 0   |
| 0   | 0    | 0   | 0   | 0   | 12  | 0   | 0   | 0   |
| 0   | 0    | 0   | 0   | 0   | 0   | 0   | 0   | 0   |
| 0   | 0    | 0   | 0   | 0   | 4   | 0   | 0   | 0   |
| 0   | 0    | 0   | 0   | 0   | 0   | 0   | 0   | 0   |
| 0   | 0    | 2   | 0   | 0   | 0   | 0   | 0   | 0   |
| 0   | 0    | 0   | 0   | 0   | 0   | 0   | 0   | 0   |
| 0   | 0    | 0   | 0   | 0   | 0   | 0   | 0   | 0   |
| 6   | 12   | 62  | 3   | 0   | 0   | 25  | 24  | 74  |
| 6   | 61   | 0   | 67  | 28  | 9   | 8   | 6   | 5   |
| 0   | 0    | 0   | 0   | 0   | 0   | 5   | 0   | 0   |
| 171 | 5    | 0   | 0   | 0   | 417 | 102 | 8   | 4   |
| 66  | 0    | 0   | 0   | 0   | 0   | 0   | 0   | 0   |
| 0   | 0    | 0   | 0   | 0   | 0   | 0   | 0   | 0   |
| 45  | 16   | 0   | 0   | 11  | 4   | 0   | 0   | 0   |

|     |     |     |     |     |     |     |     |     |
|-----|-----|-----|-----|-----|-----|-----|-----|-----|
| 0   | 9   | 6   | 0   | 7   | 2   | 0   | 0   | 2   |
| 0   | 15  | 133 | 0   | 94  | 0   | 2   | 2   | 0   |
| 4   | 4   | 13  | 0   | 0   | 0   | 0   | 0   | 18  |
| 0   | 0   | 0   | 0   | 0   | 0   | 0   | 0   | 0   |
| 0   | 0   | 0   | 0   | 0   | 7   | 0   | 0   | 0   |
| 101 | 81  | 0   | 6   | 67  | 76  | 18  | 0   | 0   |
| 5   | 0   | 0   | 0   | 10  | 6   | 5   | 0   | 0   |
| 0   | 40  | 0   | 89  | 0   | 0   | 0   | 0   | 0   |
| 0   | 0   | 0   | 0   | 0   | 33  | 0   | 0   | 0   |
| 157 | 18  | 79  | 46  | 111 | 4   | 46  | 82  | 57  |
| 0   | 3   | 178 | 6   | 0   | 0   | 91  | 0   | 0   |
| 0   | 31  | 5   | 0   | 0   | 0   | 0   | 0   | 0   |
| 0   | 2   | 0   | 4   | 0   | 0   | 0   | 0   | 0   |
| 0   | 58  | 10  | 10  | 4   | 0   | 0   | 0   | 0   |
| 0   | 9   | 0   | 0   | 0   | 0   | 3   | 10  | 3   |
| 0   | 0   | 0   | 0   | 0   | 24  | 0   | 0   | 0   |
| 0   | 0   | 0   | 0   | 0   | 0   | 0   | 0   | 0   |
| 0   | 0   | 0   | 0   | 0   | 0   | 0   | 10  | 0   |
| 879 | 91  | 3   | 93  | 54  | 693 | 421 | 75  | 18  |
| 0   | 0   | 0   | 0   | 0   | 34  | 0   | 0   | 0   |
| 0   | 0   | 22  | 0   | 0   | 0   | 10  | 0   | 0   |
| 0   | 21  | 35  | 0   | 57  | 0   | 5   | 4   | 0   |
| 80  | 61  | 9   | 53  | 17  | 237 | 160 | 59  | 51  |
| 0   | 67  | 51  | 34  | 260 | 0   | 0   | 16  | 176 |
| 0   | 0   | 0   | 0   | 0   | 0   | 0   | 0   | 0   |
| 22  | 24  | 15  | 21  | 35  | 6   | 18  | 50  | 21  |
| 17  | 2   | 0   | 0   | 10  | 6   | 4   | 0   | 0   |
| 68  | 190 | 0   | 18  | 0   | 143 | 0   | 0   | 10  |
| 112 | 38  | 125 | 109 | 43  | 115 | 32  | 353 | 0   |
| 30  | 78  | 61  | 99  | 367 | 14  | 64  | 181 | 160 |
| 0   | 91  | 31  | 367 | 22  | 0   | 0   | 0   | 0   |
| 0   | 2   | 0   | 0   | 0   | 3   | 0   | 0   | 0   |
| 0   | 73  | 0   | 8   | 5   | 44  | 0   | 53  | 0   |
| 0   | 0   | 0   | 0   | 0   | 0   | 0   | 0   | 0   |
| 0   | 0   | 0   | 0   | 0   | 0   | 0   | 0   | 0   |
| 46  | 22  | 50  | 51  | 9   | 53  | 12  | 165 | 0   |
| 0   | 8   | 60  | 0   | 0   | 0   | 0   | 0   | 0   |
| 0   | 0   | 0   | 26  | 0   | 0   | 0   | 0   | 0   |
| 0   | 0   | 0   | 0   | 0   | 0   | 0   | 0   | 0   |
| 0   | 5   | 285 | 0   | 0   | 62  | 102 | 21  | 5   |
| 2   | 31  | 10  | 20  | 36  | 0   | 106 | 11  | 4   |
| 717 | 436 | 6   | 160 | 171 | 260 | 340 | 322 | 275 |
| 4   | 0   | 7   | 0   | 2   | 0   | 0   | 0   | 0   |
| 55  | 119 | 4   | 0   | 40  | 36  | 228 | 204 | 173 |
| 0   | 0   | 0   | 2   | 18  | 0   | 0   | 0   | 0   |
| 0   | 0   | 0   | 0   | 0   | 19  | 0   | 0   | 0   |
| 155 | 42  | 0   | 0   | 0   | 3   | 0   | 0   | 0   |
| 0   | 3   | 231 | 17  | 2   | 0   | 0   | 0   | 45  |
| 0   | 7   | 24  | 9   | 2   | 0   | 0   | 0   | 30  |
| 458 | 0   | 0   | 0   | 17  | 71  | 334 | 0   | 0   |

|     |     |     |     |     |     |     |      |      |
|-----|-----|-----|-----|-----|-----|-----|------|------|
| 0   | 0   | 0   | 22  | 0   | 0   | 0   | 0    | 0    |
| 0   | 0   | 0   | 0   | 0   | 0   | 0   | 0    | 0    |
| 0   | 0   | 0   | 0   | 0   | 0   | 0   | 0    | 0    |
| 111 | 85  | 40  | 8   | 46  | 37  | 45  | 11   | 216  |
| 13  | 37  | 0   | 9   | 0   | 336 | 0   | 17   | 12   |
| 0   | 0   | 478 | 8   | 0   | 0   | 0   | 2    | 0    |
| 0   | 0   | 0   | 0   | 0   | 2   | 0   | 0    | 0    |
| 149 | 129 | 52  | 89  | 112 | 49  | 172 | 227  | 52   |
| 0   | 0   | 0   | 0   | 0   | 0   | 0   | 0    | 0    |
| 0   | 0   | 4   | 0   | 0   | 0   | 0   | 0    | 0    |
| 0   | 198 | 319 | 2   | 2   | 0   | 19  | 170  | 0    |
| 3   | 0   | 0   | 0   | 0   | 28  | 18  | 6    | 0    |
| 471 | 2   | 40  | 38  | 23  | 0   | 263 | 77   | 0    |
| 0   | 0   | 0   | 6   | 49  | 5   | 0   | 4    | 0    |
| 62  | 0   | 2   | 3   | 0   | 0   | 14  | 0    | 0    |
| 367 | 382 | 35  | 930 | 461 | 593 | 146 | 2401 | 596  |
| 0   | 0   | 0   | 42  | 0   | 0   | 0   | 0    | 0    |
| 0   | 44  | 0   | 7   | 0   | 15  | 0   | 0    | 0    |
| 0   | 0   | 0   | 35  | 81  | 0   | 0   | 0    | 0    |
| 21  | 9   | 0   | 16  | 4   | 17  | 20  | 72   | 51   |
| 155 | 63  | 0   | 18  | 362 | 125 | 286 | 39   | 17   |
| 4   | 177 | 289 | 11  | 0   | 23  | 901 | 0    | 18   |
| 205 | 20  | 0   | 42  | 0   | 37  | 186 | 538  | 15   |
| 2   | 18  | 66  | 42  | 2   | 0   | 7   | 0    | 15   |
| 0   | 0   | 0   | 0   | 0   | 0   | 0   | 0    | 0    |
| 37  | 0   | 0   | 0   | 0   | 26  | 0   | 0    | 25   |
| 0   | 20  | 20  | 12  | 4   | 0   | 0   | 2    | 0    |
| 0   | 431 | 5   | 12  | 0   | 0   | 2   | 58   | 1453 |
| 43  | 0   | 4   | 5   | 4   | 0   | 0   | 28   | 0    |
| 2   | 36  | 276 | 90  | 18  | 0   | 133 | 6    | 32   |
| 0   | 208 | 395 | 63  | 18  | 0   | 0   | 22   | 75   |
| 0   | 7   | 17  | 0   | 5   | 0   | 2   | 19   | 0    |
| 0   | 0   | 0   | 0   | 0   | 0   | 0   | 0    | 0    |
| 0   | 0   | 0   | 0   | 0   | 3   | 0   | 0    | 0    |
| 0   | 2   | 11  | 2   | 0   | 0   | 0   | 0    | 0    |
| 0   | 42  | 0   | 0   | 31  | 0   | 0   | 148  | 0    |
| 0   | 0   | 0   | 0   | 0   | 0   | 0   | 0    | 0    |
| 0   | 4   | 0   | 13  | 0   | 0   | 13  | 0    | 0    |
| 0   | 10  | 0   | 0   | 0   | 67  | 0   | 0    | 19   |
| 0   | 0   | 0   | 0   | 0   | 7   | 0   | 0    | 0    |
| 0   | 0   | 0   | 0   | 0   | 2   | 0   | 0    | 0    |
| 0   | 54  | 0   | 0   | 19  | 0   | 0   | 0    | 0    |
| 0   | 135 | 0   | 0   | 0   | 0   | 0   | 0    | 0    |
| 2   | 30  | 147 | 14  | 21  | 3   | 7   | 0    | 74   |
| 0   | 0   | 0   | 0   | 0   | 0   | 0   | 0    | 0    |
| 0   | 58  | 0   | 0   | 0   | 13  | 0   | 2    | 0    |
| 4   | 652 | 9   | 27  | 0   | 268 | 50  | 0    | 42   |
| 0   | 41  | 0   | 0   | 0   | 0   | 0   | 0    | 0    |
| 14  | 199 | 48  | 281 | 92  | 28  | 174 | 440  | 23   |
| 173 | 0   | 0   | 0   | 0   | 90  | 20  | 0    | 0    |

|             |             |             |             |             |             |             |             |             |
|-------------|-------------|-------------|-------------|-------------|-------------|-------------|-------------|-------------|
| 160         | 0           | 0           | 0           | 0           | 76          | 0           | 0           | 0           |
| 0           | 0           | 0           | 657         | 0           | 0           | 0           | 0           | 0           |
| 2           | 23          | 22          | 37          | 6           | 0           | 0           | 14          | 3           |
| 0           | 10          | 0           | 29          | 60          | 0           | 0           | 0           | 0           |
| 0           | 49          | 109         | 17          | 9           | 0           | 44          | 53          | 0           |
| 33          | 84          | 0           | 59          | 361         | 126         | 96          | 28          | 26          |
| 95          | 115         | 0           | 67          | 121         | 42          | 40          | 23          | 12          |
| 19          | 4           | 34          | 5           | 215         | 7           | 0           | 6           | 57          |
| 0           | 78          | 14          | 9           | 0           | 3           | 0           | 0           | 7           |
| 29          | 15          | 86          | 8           | 2           | 11          | 13          | 40          | 11          |
| 0           | 14          | 78          | 31          | 38          | 5           | 2           | 0           | 0           |
| 24          | 24          | 14          | 8           | 6           | 71          | 7           | 6           | 22          |
| 613         | 0           | 0           | 0           | 4           | 498         | 61          | 0           | 0           |
| 18          | 74          | 7           | 18          | 107         | 34          | 0           | 113         | 20          |
| 0           | 3           | 0           | 18          | 0           | 0           | 0           | 0           | 0           |
| 35          | 33          | 0           | 4           | 76          | 0           | 4           | 0           | 0           |
| 0           | 0           | 0           | 0           | 0           | 20          | 0           | 0           | 0           |
| 0           | 0           | 0           | 0           | 0           | 0           | 0           | 0           | 0           |
| 79          | 223         | 8           | 29          | 3           | 32          | 61          | 4           | 2           |
| 32          | 0           | 0           | 0           | 0           | 6           | 0           | 0           | 0           |
| 0           | 5           | 0           | 46          | 11          | 0           | 0           | 0           | 0           |
| 6           | 20          | 12          | 7           | 2           | 6           | 24          | 130         | 24          |
| 0           | 0           | 0           | 0           | 0           | 0           | 0           | 0           | 0           |
| 463         | 0           | 3           | 6           | 0           | 67          | 0           | 0           | 0           |
| 0           | 3           | 0           | 0           | 0           | 0           | 0           | 0           | 0           |
| 93          | 72          | 351         | 37          | 211         | 34          | 39          | 98          | 118         |
| 46          | 37          | 4           | 0           | 0           | 0           | 93          | 7           | 0           |
| 0           | 0           | 0           | 0           | 0           | 0           | 33          | 0           | 0           |
| 0           | 15          | 0           | 0           | 0           | 0           | 0           | 0           | 0           |
| 191         | 14          | 0           | 38          | 13          | 24          | 7           | 76          | 21          |
| 17          | 19          | 252         | 4           | 4           | 3           | 14          | 3           | 6           |
| 0           | 0           | 0           | 0           | 4           | 0           | 0           | 0           | 0           |
| 5           | 10          | 36          | 12          | 0           | 4           | 12          | 4           | 25          |
| 0           | 0           | 0           | 0           | 0           | 0           | 0           | 0           | 0           |
| <b>6706</b> | <b>5690</b> | <b>4588</b> | <b>4241</b> | <b>3966</b> | <b>4792</b> | <b>5027</b> | <b>6510</b> | <b>4117</b> |

taxonomy

Bacteria;Firmicutes;Clostridia;Clostridiales;Lachnospiraceae;Blautia;  
Bacteria;Chlamydiae;Chlamydiae;Chlamydiales;Chlamydiaceae;Chlamydia;  
Bacteria;Firmicutes;Clostridia;Clostridiales;vadinBB60;;  
Bacteria;Firmicutes;Clostridia;Clostridiales;vadinBB60;;  
Bacteria;Firmicutes;Clostridia;Clostridiales;Lachnospiraceae;;  
Bacteria;Firmicutes;Clostridia;Clostridiales;Ruminococcaceae;Ruminococcus;  
Bacteria;Firmicutes;Clostridia;Clostridiales;Lachnospiraceae;Coproccoccus;  
Bacteria;Firmicutes;Clostridia;Clostridiales;Clostridiaceae;;  
Bacteria;Firmicutes;Clostridia;Clostridiales;Lachnospiraceae;;  
Bacteria;Firmicutes;Clostridia;Clostridiales;Lachnospiraceae;;  
Bacteria;Firmicutes;Clostridia;Clostridiales;Lachnospiraceae;;  
Bacteria;Firmicutes;Clostridia;Clostridiales;Ruminococcaceae;;  
Bacteria;Firmicutes;Clostridia;Clostridiales;Lachnospiraceae;Blautia;  
Bacteria;Bacteroidetes;Bacteroidia;Bacteroidales;Rikenellaceae;;  
Bacteria;Firmicutes;Clostridia;Clostridiales;vadinBB60;;  
Bacteria;Firmicutes;Clostridia;Clostridiales;Ruminococcaceae;;  
Bacteria;Firmicutes;Clostridia;Clostridiales;Ruminococcaceae;;  
Bacteria;Firmicutes;Clostridia;Clostridiales;Lachnospiraceae;Roseburia;  
Bacteria;Bacteroidetes;Bacteroidia;Bacteroidales;Rikenellaceae;Alistipes;  
Bacteria;Firmicutes;Clostridia;Clostridiales;Lachnospiraceae;;  
Bacteria;Firmicutes;Clostridia;Clostridiales;Ruminococcaceae;;  
Bacteria;Bacteroidetes;Bacteroidia;Bacteroidales;Porphyromonadaceae;;  
Bacteria;Proteobacteria;Alphaproteobacteria;Rhodospirillales;Rhodospirillaceae;Thalassospira;  
Bacteria;Firmicutes;Clostridia;Clostridiales;Lachnospiraceae;Blautia;  
Bacteria;Cyanobacteria;Melainabacteria;Gastranaerophilales;;;  
Bacteria;Proteobacteria;Alphaproteobacteria;Rhodospirillales;Rhodospirillaceae;Thalassospira;  
Bacteria;Firmicutes;Clostridia;Clostridiales;Ruminococcaceae;Oscillibacter;  
Bacteria;Bacteroidetes;Bacteroidia;Bacteroidales;Porphyromonadaceae;;  
Bacteria;Bacteroidetes;Bacteroidia;Bacteroidales;Bacteroidaceae;Bacteroides;acidifaciens  
Bacteria;Firmicutes;Clostridia;Clostridiales;Ruminococcaceae;Butyricoccus;  
Bacteria;Firmicutes;Clostridia;Clostridiales;Lachnospiraceae;;  
Bacteria;Firmicutes;Clostridia;Clostridiales;Lachnospiraceae;;  
Bacteria;Firmicutes;Clostridia;Clostridiales;Lachnospiraceae;;  
Bacteria;Firmicutes;Clostridia;Clostridiales;Lachnospiraceae;;  
Bacteria;Proteobacteria;Epsilonproteobacteria;Campylobacteriales;Helicobacteraceae;Helicobacter;  
Bacteria;Firmicutes;Clostridia;Clostridiales;Ruminococcaceae;;  
Bacteria;Firmicutes;Clostridia;Clostridiales;Ruminococcaceae;;  
Bacteria;Firmicutes;Clostridia;Clostridiales;Ruminococcaceae;;  
Bacteria;Firmicutes;Clostridia;Clostridiales;Lachnospiraceae;Roseburia;  
Bacteria;Firmicutes;Erysipelotrichia;Erysipelotrichales;Erysipelotrichaceae;Clostridium XVIII;  
Bacteria;Firmicutes;Clostridia;Clostridiales;Lachnospiraceae;;  
Bacteria;Firmicutes;Clostridia;Clostridiales;Ruminococcaceae;;  
Bacteria;Firmicutes;Erysipelotrichia;Erysipelotrichales;Erysipelotrichaceae;Clostridium XVIII;  
Bacteria;Bacteroidetes;Bacteroidia;Bacteroidales;Porphyromonadaceae;;  
Bacteria;Firmicutes;Clostridia;Clostridiales;Lachnospiraceae;Blautia;  
Bacteria;Bacteroidetes;Bacteroidia;Bacteroidales;Rikenellaceae;Alistipes;  
Bacteria;Bacteroidetes;Bacteroidia;Bacteroidales;Porphyromonadaceae;;  
Bacteria;Firmicutes;Clostridia;Clostridiales;Ruminococcaceae;Oscillibacter;  
Bacteria;Bacteroidetes;Bacteroidia;Bacteroidales;Porphyromonadaceae;Odoribacter;

Bacteria;Firmicutes;Clostridia;Clostridiales;Lachnospiraceae;Coprococcus;  
Bacteria;Cyanobacteria;Melainabacteria;Gastraerophilales;;;  
Bacteria;Proteobacteria;Betaproteobacteria;Burkholderiales;Alcaligenaceae;Sutterella;  
Bacteria;Firmicutes;Clostridia;Clostridiales;Ruminococcaceae;;  
Bacteria;Cyanobacteria;Melainabacteria;Gastraerophilales;;;  
Bacteria;Bacteroidetes;Bacteroidia;Bacteroidales;Porphyromonadaceae;Barnesiella;  
Bacteria;Bacteroidetes;Bacteroidia;Bacteroidales;Porphyromonadaceae;;  
Bacteria;Bacteroidetes;Bacteroidia;Bacteroidales;Porphyromonadaceae;;  
Bacteria;Firmicutes;Bacilli;Lactobacillales;Lactobacillaceae;Lactobacillus;  
Bacteria;Firmicutes;Clostridia;Clostridiales;Lachnospiraceae;Blautia;  
Bacteria;Firmicutes;Clostridia;Clostridiales;Ruminococcaceae;;  
Bacteria;Firmicutes;Clostridia;Clostridiales;Lachnospiraceae;;  
Bacteria;Firmicutes;Clostridia;Clostridiales;Lachnospiraceae;;  
Bacteria;Bacteroidetes;Bacteroidia;Bacteroidales;Porphyromonadaceae;;  
Bacteria;Firmicutes;Clostridia;Clostridiales;vadinBB60;;  
Bacteria;Firmicutes;Clostridia;Clostridiales;Lachnospiraceae;Roseburia;  
Bacteria;Bacteroidetes;Bacteroidia;Bacteroidales;Porphyromonadaceae;Barnesiella;  
Bacteria;Firmicutes;Clostridia;Clostridiales;Lachnospiraceae;;  
Bacteria;Firmicutes;Clostridia;Clostridiales;vadinBB60;;  
Bacteria;Bacteroidetes;Bacteroidia;Bacteroidales;Porphyromonadaceae;;  
Bacteria;Bacteroidetes;Bacteroidia;Bacteroidales;Porphyromonadaceae;;  
Bacteria;Firmicutes;Clostridia;Clostridiales;Lachnospiraceae;;  
Bacteria;Firmicutes;Clostridia;Clostridiales;Lachnospiraceae;;  
Bacteria;Firmicutes;Clostridia;Clostridiales;Ruminococcaceae;;  
Bacteria;Firmicutes;Clostridia;Clostridiales;Lachnospiraceae;;  
Bacteria;Firmicutes;Clostridia;Clostridiales;Ruminococcaceae;Ruminococcus;  
Bacteria;Bacteroidetes;Bacteroidia;Bacteroidales;Rikenellaceae;Alistipes;  
Bacteria;Proteobacteria;Alphaproteobacteria;Rhodospirillales;Rhodospirillaceae;Thalassospira;  
Bacteria;Bacteroidetes;Bacteroidia;Bacteroidales;Porphyromonadaceae;;  
Bacteria;TM7;TM7;TM7;TM7;Saccharimonas;  
Bacteria;Firmicutes;Clostridia;Clostridiales;Defluviitaleaceae;;  
Bacteria;Firmicutes;Clostridia;Clostridiales;Ruminococcaceae;Ruminococcus;bromii  
Bacteria;Firmicutes;Clostridia;Clostridiales;vadinBB60;;  
Bacteria;Firmicutes;Clostridia;Clostridiales;Lachnospiraceae;Anaerostipes;  
Bacteria;Firmicutes;Clostridia;Clostridiales;Lachnospiraceae;Blautia;  
Bacteria;Firmicutes;Clostridia;Clostridiales;Lachnospiraceae;;  
Bacteria;Firmicutes;Clostridia;Clostridiales;Lachnospiraceae;Roseburia;  
Bacteria;Firmicutes;Clostridia;Clostridiales;Lachnospiraceae;;  
Bacteria;Cyanobacteria;Melainabacteria;Gastraerophilales;;;  
Bacteria;Firmicutes;Clostridia;Clostridiales;Ruminococcaceae;Oscillibacter;  
Bacteria;Bacteroidetes;Bacteroidia;Bacteroidales;Porphyromonadaceae;;  
Bacteria;Bacteroidetes;Bacteroidia;Bacteroidales;Porphyromonadaceae;;  
Bacteria;Bacteroidetes;Bacteroidia;Bacteroidales;Porphyromonadaceae;;  
Bacteria;Bacteroidetes;Bacteroidia;Bacteroidales;Porphyromonadaceae;;  
Bacteria;Firmicutes;Clostridia;Clostridiales;Ruminococcaceae;Anaerotruncus;  
Bacteria;Firmicutes;Bacilli;Lactobacillales;Lactobacillaceae;Lactobacillus;  
Bacteria;Firmicutes;Clostridia;Clostridiales;Lachnospiraceae;Blautia;  
Bacteria;Firmicutes;Clostridia;Clostridiales;Lachnospiraceae;;  
Bacteria;Firmicutes;Clostridia;Clostridiales;vadinBB60;;  
Bacteria;Firmicutes;Clostridia;Clostridiales;Peptococcaceae;;



Bacteria;Firmicutes;Erysipelotrichi;Erysipelotrichales;Erysipelotrichaceae;Eubacterium;dolichum  
Bacteria;Bacteroidetes;Bacteroidia;Bacteroidales;Porphyromonadaceae;;  
Bacteria;Firmicutes;Clostridia;Clostridiales;Lachnospiraceae;;  
Bacteria;Bacteroidetes;Bacteroidia;Bacteroidales;Porphyromonadaceae;;  
Bacteria;Firmicutes;Clostridia;Clostridiales;Lachnospiraceae;;  
Bacteria;Bacteroidetes;Bacteroidia;Bacteroidales;Prevotellaceae;;  
Bacteria;Firmicutes;Clostridia;Clostridiales;Ruminococcaceae;;  
Bacteria;Firmicutes;Clostridia;Clostridiales;Lachnospiraceae;Ruminococcus;gnavus  
Bacteria;Bacteroidetes;Bacteroidia;Bacteroidales;Porphyromonadaceae;;  
Bacteria;Firmicutes;Clostridia;Clostridiales;Lachnospiraceae;Marvinbryantia;  
Bacteria;Bacteroidetes;Bacteroidia;Bacteroidales;Rikenellaceae;Alistipes;  
Bacteria;Firmicutes;Clostridia;Clostridiales;vadinBB60;;  
Bacteria;Proteobacteria;Epsilonproteobacteria;Campylobacterales;Helicobacteraceae;Helicobacter;  
Bacteria;Firmicutes;Clostridia;Clostridiales;Ruminococcaceae;Oscillibacter;  
Bacteria;Firmicutes;Clostridia;Clostridiales;Lachnospiraceae;;  
Bacteria;Bacteroidetes;Bacteroidia;Bacteroidales;Porphyromonadaceae;;  
Bacteria;Bacteroidetes;Bacteroidia;Bacteroidales;Rikenellaceae;Rikenella;  
Bacteria;Firmicutes;Clostridia;Clostridiales;Lachnospiraceae;;  
Bacteria;Firmicutes;Clostridia;Clostridiales;Lachnospiraceae;;  
Bacteria;Bacteroidetes;Bacteroidia;Bacteroidales;Rikenellaceae;Alistipes;  
Bacteria;Firmicutes;Clostridia;Clostridiales;Lachnospiraceae;;  
Bacteria;Firmicutes;Clostridia;Clostridiales;vadinBB60;;  
Bacteria;Firmicutes;Clostridia;Clostridiales;Lachnospiraceae;;  
Bacteria;Proteobacteria;Deltaproteobacteria;Desulfovibrionales;Desulfovibrionaceae;Desulfovibrio;  
Bacteria;Bacteroidetes;Bacteroidia;Bacteroidales;Porphyromonadaceae;;  
Bacteria;Bacteroidetes;Bacteroidia;Bacteroidales;Porphyromonadaceae;;  
Bacteria;Firmicutes;Clostridia;Clostridiales;Ruminococcaceae;;  
Bacteria;Bacteroidetes;Bacteroidia;Bacteroidales;Porphyromonadaceae;;  
Bacteria;Firmicutes;Clostridia;Clostridiales;;;  
Bacteria;Firmicutes;Clostridia;Clostridiales;Lachnospiraceae;Anaerostipes;  
Bacteria;Firmicutes;Clostridia;Clostridiales;Lachnospiraceae;Blautia;  
Bacteria;Firmicutes;Clostridia;Clostridiales;Ruminococcaceae;;  
Bacteria;Firmicutes;Clostridia;Clostridiales;Lachnospiraceae;Ruminococcus;gnavus  
Bacteria;Firmicutes;Clostridia;Clostridiales;Lachnospiraceae;;  
Bacteria;Firmicutes;Clostridia;Clostridiales;;;  
Bacteria;Bacteroidetes;Bacteroidia;Bacteroidales;Porphyromonadaceae;;  
Bacteria;Firmicutes;Clostridia;Clostridiales;Lachnospiraceae;Anaerostipes;  
Bacteria;Firmicutes;Clostridia;Clostridiales;Ruminococcaceae;;  
Bacteria;Firmicutes;Clostridia;Clostridiales;Ruminococcaceae;Ruminococcus;  
Bacteria;Firmicutes;Clostridia;Clostridiales;Lachnospiraceae;;  
Bacteria;Firmicutes;Clostridia;Clostridiales;Lachnospiraceae;;  
Bacteria;Tenericutes;Mollicutes;RF9;;;  
Bacteria;Firmicutes;Clostridia;Clostridiales;Lachnospiraceae;;  
Bacteria;Firmicutes;Clostridia;Clostridiales;Lachnospiraceae;;  
Bacteria;Bacteroidetes;Bacteroidia;Bacteroidales;Porphyromonadaceae;;  
Bacteria;Bacteroidetes;Bacteroidia;Bacteroidales;Porphyromonadaceae;;  
Bacteria;Bacteroidetes;Bacteroidia;Bacteroidales;Rikenellaceae;Alistipes;  
Bacteria;Cyanobacteria;Melainabacteria;Gastranaerophilales;;;  
Bacteria;Firmicutes;Clostridia;Clostridiales;Lachnospiraceae;Dorea;  
Bacteria;Proteobacteria;Alphaproteobacteria;Rhodospirillales;Rhodospirillaceae;Thalassospira;

Bacteria;Firmicutes;Clostridia;Clostridiales;Ruminococcaceae;Anaerotruncus;  
Bacteria;Firmicutes;Clostridia;Clostridiales;Lachnospiraceae;Roseburia;  
Bacteria;Firmicutes;Clostridia;Clostridiales;Lachnospiraceae;;  
Bacteria;Firmicutes;Clostridia;Clostridiales;Lachnospiraceae;Blautia;  
Bacteria;Firmicutes;Clostridia;Clostridiales;Ruminococcaceae;Butyricoccus;  
Bacteria;Bacteroidetes;Bacteroidia;Bacteroidales;Porphyromonadaceae;;  
Bacteria;Firmicutes;Erysipelotrichi;Erysipelotrichales;Erysipelotrichaceae;Eubacterium;dolichum  
Bacteria;Bacteroidetes;Bacteroidia;Bacteroidales;Porphyromonadaceae;;  
Bacteria;Bacteroidetes;Bacteroidia;Bacteroidales;Porphyromonadaceae;;  
Bacteria;Bacteroidetes;Bacteroidia;Bacteroidales;Porphyromonadaceae;Odoribacter;  
Bacteria;Firmicutes;Clostridia;Clostridiales;Lachnospiraceae;;  
Bacteria;Firmicutes;Clostridia;Clostridiales;Ruminococcaceae;;  
Bacteria;Firmicutes;Clostridia;Clostridiales;Lachnospiraceae;Blautia;  
Bacteria;Firmicutes;Clostridia;Clostridiales;Lachnospiraceae;;  
Bacteria;Firmicutes;Clostridia;Clostridiales;vadinBB60;;  
Bacteria;Firmicutes;Clostridia;Clostridiales;Ruminococcaceae;Butyricoccus;  
Bacteria;Firmicutes;Clostridia;Clostridiales;Lachnospiraceae;Butyrivibrio;  
Bacteria;Bacteroidetes;Bacteroidia;Bacteroidales;Porphyromonadaceae;;  
Bacteria;Bacteroidetes;Bacteroidia;Bacteroidales;Bacteroidaceae;Bacteroides;  
Bacteria;Firmicutes;Clostridia;Clostridiales;Ruminococcaceae;;  
Bacteria;Firmicutes;Clostridia;Clostridiales;Ruminococcaceae;;  
Bacteria;Firmicutes;Clostridia;Clostridiales;Ruminococcaceae;Oscillibacter;  
Bacteria;Firmicutes;Bacilli;Lactobacillales;Lactobacillaceae;Lactobacillus;  
Bacteria;Firmicutes;Clostridia;Clostridiales;Lachnospiraceae;Blautia;  
Bacteria;Firmicutes;Clostridia;Clostridiales;Peptostreptococcaceae;Clostridium XI;  
Bacteria;Firmicutes;Clostridia;Clostridiales;Ruminococcaceae;;  
Bacteria;Bacteroidetes;Bacteroidia;Bacteroidales;Porphyromonadaceae;Parabacteroides;  
Bacteria;Bacteroidetes;Bacteroidia;Bacteroidales;Porphyromonadaceae;;  
Bacteria;Firmicutes;Clostridia;Clostridiales;Lachnospiraceae;Blautia;  
Bacteria;Proteobacteria;Deltaproteobacteria;Desulfovibrionales;Desulfovibrionaceae;Desulfovibrio;  
Bacteria;Proteobacteria;Epsilonproteobacteria;Campylobacterales;Helicobacteraceae;Helicobacter;  
Bacteria;Firmicutes;Clostridia;Clostridiales;Lachnospiraceae;;  
Bacteria;Firmicutes;Clostridia;Clostridiales;Lachnospiraceae;;  
Bacteria;Actinobacteria;Actinobacteria;Bifidobacteriales;Bifidobacteriaceae;Bifidobacterium;animalis  
Bacteria;Firmicutes;Clostridia;Clostridiales;Lachnospiraceae;;  
Bacteria;Firmicutes;Clostridia;Clostridiales;Lachnospiraceae;Blautia;  
Bacteria;Firmicutes;Clostridia;Clostridiales;Lachnospiraceae;;  
Bacteria;Firmicutes;Clostridia;Clostridiales;Lachnospiraceae;Blautia;  
Bacteria;Firmicutes;Clostridia;Clostridiales;Lachnospiraceae;;  
Bacteria;Firmicutes;Clostridia;Clostridiales;Lachnospiraceae;;  
Bacteria;Bacteroidetes;Bacteroidia;Bacteroidales;Bacteroidaceae;Bacteroides;  
Bacteria;Bacteroidetes;Bacteroidia;Bacteroidales;;;  
Bacteria;Firmicutes;Clostridia;Clostridiales;Lachnospiraceae;;  
Bacteria;Bacteroidetes;Bacteroidia;Bacteroidales;Rikenellaceae;Alistipes;  
Bacteria;Firmicutes;Clostridia;Clostridiales;Lachnospiraceae;Blautia;  
Bacteria;Firmicutes;Clostridia;Clostridiales;Lachnospiraceae;;  
Bacteria;Cyanobacteria;Melainabacteria;Gastranaerophilales;;;  
Bacteria;Firmicutes;Clostridia;Clostridiales;Lachnospiraceae;Blautia;  
Bacteria;Firmicutes;Clostridia;Clostridiales;Lachnospiraceae;;  
Bacteria;Bacteroidetes;Bacteroidia;Bacteroidales;Porphyromonadaceae;Parabacteroides;

Bacteria;Firmicutes;Clostridia;Clostridiales;Lachnospiraceae;;  
Bacteria;Firmicutes;Clostridia;Clostridiales;Lachnospiraceae;Roseburia;  
Bacteria;Firmicutes;Clostridia;Clostridiales;Ruminococcaceae;Flavonifractor;  
Bacteria;Firmicutes;Clostridia;Clostridiales;Lachnospiraceae;;  
Bacteria;Bacteroidetes;Bacteroidia;Bacteroidales;Bacteroidaceae;Bacteroides;  
Bacteria;Firmicutes;Clostridia;Clostridiales;Lachnospiraceae;Blautia;  
Bacteria;Firmicutes;Clostridia;Clostridiales;Lachnospiraceae;;  
Bacteria;Bacteroidetes;Bacteroidia;Bacteroidales;Porphyromonadaceae;Odoribacter;  
Bacteria;Firmicutes;Clostridia;Clostridiales;Lachnospiraceae;;  
Bacteria;Firmicutes;Clostridia;Clostridiales;Lachnospiraceae;Roseburia;  
Bacteria;Firmicutes;Clostridia;Clostridiales;Lachnospiraceae;Blautia;  
Bacteria;Firmicutes;Clostridia;Clostridiales;Lachnospiraceae;;  
Bacteria;Firmicutes;Clostridia;Clostridiales;Lachnospiraceae;Blautia;  
Bacteria;Firmicutes;Clostridia;Clostridiales;vadinBB60;;  
Bacteria;Bacteroidetes;Bacteroidia;Bacteroidales;Rikenellaceae;Alistipes;  
Bacteria;Bacteroidetes;Bacteroidia;Bacteroidales;Prevotellaceae;Prevotella;  
Bacteria;Firmicutes;Clostridia;Clostridiales;Lachnospiraceae;;  
Bacteria;Firmicutes;Clostridia;Clostridiales;Lachnospiraceae;Roseburia;  
Bacteria;Tenericutes; Mollicutes; Achleplasmatales; Achleplasmataceae;;  
Bacteria;Bacteroidetes;Bacteroidia;Bacteroidales;Bacteroidaceae;Bacteroides;  
Bacteria;Bacteroidetes;Bacteroidia;Bacteroidales;Rikenellaceae;Alistipes;  
Bacteria;Firmicutes;Clostridia;Clostridiales;Lachnospiraceae;Ruminococcus;gnavus  
Bacteria;Bacteroidetes;Bacteroidia;Bacteroidales;Rikenellaceae;RC9 gut group;  
Bacteria;Firmicutes;Clostridia;Clostridiales;Ruminococcaceae;;  
Bacteria;Firmicutes;Clostridia;Clostridiales;Lachnospiraceae;;  
Bacteria;Firmicutes;Clostridia;Clostridiales;Lachnospiraceae;Blautia;producta  
Bacteria;Firmicutes;Clostridia;Clostridiales;Lachnospiraceae;;  
Bacteria;Firmicutes;Clostridia;Clostridiales;Lachnospiraceae;Blautia;  
Bacteria;Firmicutes;Clostridia;Clostridiales;vadinBB60;;  
Bacteria;Firmicutes;Clostridia;Clostridiales;Lachnospiraceae;;  
Bacteria;Firmicutes;Clostridia;Clostridiales;Lachnospiraceae;;  
Bacteria;Firmicutes;Clostridia;Clostridiales;vadinBB60;;  
Bacteria;Firmicutes;Clostridia;Clostridiales;Lachnospiraceae;Blautia;  
Bacteria;Firmicutes;Clostridia;Clostridiales;Lachnospiraceae;;  
Bacteria;Firmicutes;Clostridia;Clostridiales;Lachnospiraceae;;  
Bacteria;Firmicutes;Clostridia;Clostridiales;Lachnospiraceae;;  
Bacteria;Firmicutes;Clostridia;Clostridiales;Lachnospiraceae;Blautia;  
Bacteria;Firmicutes;Clostridia;Clostridiales;Lachnospiraceae;Blautia;  
Bacteria;Firmicutes;Clostridia;Clostridiales;Lachnospiraceae;;  
Bacteria;Firmicutes;Clostridia;Clostridiales;Lachnospiraceae;;  
Bacteria;Firmicutes;Erysipelotrichia;Erysipelotrichales;Erysipelotrichaceae;Coprobacillus;  
Bacteria;Firmicutes;Clostridia;Clostridiales;Lachnospiraceae;Anaerostipes;  
Bacteria;Firmicutes;Clostridia;Clostridiales;Ruminococcaceae;;  
Bacteria;Firmicutes;Clostridia;Clostridiales;Lachnospiraceae;;  
Bacteria;Firmicutes;Clostridia;Clostridiales;Ruminococcaceae;;  
Bacteria;Firmicutes;Clostridia;Clostridiales;Lachnospiraceae;;  
Bacteria;Firmicutes;Clostridia;Clostridiales;Ruminococcaceae;Ruminococcus;  
Bacteria;Bacteroidetes;Bacteroidia;Bacteroidales;Porphyromonadaceae;;  
Bacteria;Firmicutes;Clostridia;Clostridiales;Lachnospiraceae;Blautia;  
Bacteria;Bacteroidetes;Bacteroidia;Bacteroidales;Porphyromonadaceae;;  
Bacteria;Bacteroidetes;Bacteroidia;Bacteroidales;Prevotellaceae;Prevotella;

Bacteria;Bacteroidetes;Bacteroidia;Bacteroidales;Prevotellaceae;Prevotella;  
Bacteria;Firmicutes;Clostridia;Clostridiales;Lachnospiraceae;;  
Bacteria;Firmicutes;Clostridia;Clostridiales;Lachnospiraceae;unclassified\_Lachnospiraceae;  
Bacteria;Firmicutes;Clostridia;Clostridiales;Lachnospiraceae;;  
Bacteria;Firmicutes;Clostridia;Clostridiales;Lachnospiraceae;Marvinbryantia;  
Bacteria;Bacteroidetes;Bacteroidia;Bacteroidales;Porphyromonadaceae;Parabacteroides;  
Bacteria;Bacteroidetes;Bacteroidia;Bacteroidales;Porphyromonadaceae;;  
Bacteria;Deferribacteres;Deferribacteres;Deferribacterales;Deferribacteraceae;Mucispirillum;schaedler  
Bacteria;Bacteroidetes;Bacteroidia;Bacteroidales;Porphyromonadaceae;;  
Bacteria;Firmicutes;Clostridia;Clostridiales;Lachnospiraceae;;  
Bacteria;Firmicutes;Clostridia;Clostridiales;Ruminococcaceae;Oscilibacter;  
Bacteria;Firmicutes;Clostridia;Clostridiales;Clostridiaceae;Candidatus Arthromitus;  
Bacteria;Verrucomicrobia;Verrucomicrobiae;Verrucomicrobiales;Verrucomicrobiaceae;Akkermansia;  
Bacteria;Bacteroidetes;Bacteroidia;Bacteroidales;Porphyromonadaceae;Parabacteroides;  
Bacteria;Proteobacteria;Alphaproteobacteria;Rickettsiales;mitochondria;;  
Bacteria;Firmicutes;Clostridia;Clostridiales;vadinBB60;;  
Bacteria;Firmicutes;Clostridia;Clostridiales;Lachnospiraceae;;  
Bacteria;Firmicutes;Clostridia;Clostridiales;Peptostreptococcaceae;Clostridium XI;  
Bacteria;Firmicutes;Bacilli;Lactobacillales;Lactobacillaceae;Lactobacillus;  
Bacteria;Firmicutes;Clostridia;Clostridiales;Ruminococcaceae;;  
Bacteria;Firmicutes;Clostridia;Clostridiales;Defluviitaleaceae;;  
Bacteria;Bacteroidetes;Bacteroidia;Bacteroidales;;;  
Bacteria;Firmicutes;Clostridia;Clostridiales;Lachnospiraceae;Blautia;  
Bacteria;Firmicutes;Clostridia;Clostridiales;Lachnospiraceae;Blautia;  
Bacteria;Firmicutes;Clostridia;Clostridiales;Lachnospiraceae;Coproccoccus;  
Bacteria;Firmicutes;Clostridia;Clostridiales;Ruminococcaceae;;  
Bacteria;Tenericutes;Mollicutes;Anaeroplasmatales;Anaeroplasmataceae;Anaeroplasma;  
Bacteria;Firmicutes;Clostridia;Clostridiales;Ruminococcaceae;;  
Bacteria;Firmicutes;Clostridia;Clostridiales;Lachnospiraceae;Roseburia;  
Bacteria;Bacteroidetes;Bacteroidia;Bacteroidales;Prevotellaceae;;  
Bacteria;Firmicutes;Clostridia;Clostridiales;Lachnospiraceae;Dorea;  
Bacteria;Firmicutes;Clostridia;Clostridiales;Ruminococcaceae;;  
Bacteria;Firmicutes;Clostridia;Clostridiales;Ruminococcaceae;;  
Bacteria;Firmicutes;Clostridia;Clostridiales;Ruminococcaceae;;















| OTUId   | SPF.509 | SPF.490 | SPF.491 | SPF.492 | SPF.493 | SPF.494 | SPF.495 |
|---------|---------|---------|---------|---------|---------|---------|---------|
| OTU_1   | 875     | 2155    | 1040    | 992     | 2130    | 964     | 1691    |
| OTU_10  | 534     | 825     | 310     | 523     | 1007    | 418     | 690     |
| OTU_102 | 17      | 42      | 7       | 21      | 81      | 19      | 51      |
| OTU_103 | 5       | 22      | 5       | 21      | 2       | 3       | 2       |
| OTU_104 | 67      | 41      | 40      | 46      | 85      | 36      | 42      |
| OTU_105 | 45      | 63      | 39      | 59      | 107     | 76      | 54      |
| OTU_106 | 49      | 58      | 49      | 46      | 95      | 36      | 76      |
| OTU_107 | 22      | 67      | 28      | 48      | 94      | 64      | 42      |
| OTU_108 | 55      | 92      | 161     | 104     | 167     | 90      | 112     |
| OTU_109 | 22      | 32      | 12      | 7       | 7       | 24      | 15      |
| OTU_11  | 276     | 105     | 9       | 550     | 515     | 26      | 118     |
| OTU_111 | 10      | 49      | 52      | 18      | 21      | 0       | 2       |
| OTU_112 | 76      | 70      | 46      | 33      | 93      | 54      | 50      |
| OTU_113 | 22      | 11      | 76      | 29      | 11      | 0       | 10      |
| OTU_115 | 0       | 21      | 7       | 67      | 2       | 2       | 10      |
| OTU_12  | 399     | 108     | 62      | 289     | 74      | 58      | 54      |
| OTU_120 | 79      | 145     | 62      | 110     | 106     | 128     | 130     |
| OTU_121 | 3       | 55      | 18      | 12      | 26      | 15      | 5       |
| OTU_122 | 28      | 77      | 48      | 63      | 55      | 55      | 49      |
| OTU_13  | 138     | 608     | 1515    | 152     | 578     | 16      | 172     |
| OTU_130 | 59      | 53      | 26      | 57      | 40      | 34      | 42      |
| OTU_134 | 11      | 3       | 0       | 2       | 35      | 0       | 89      |
| OTU_139 | 49      | 49      | 28      | 32      | 25      | 25      | 20      |
| OTU_14  | 0       | 0       | 386     | 89      | 4       | 0       | 4       |
| OTU_145 | 9       | 38      | 15      | 12      | 36      | 29      | 10      |
| OTU_148 | 18      | 37      | 15      | 14      | 0       | 0       | 10      |
| OTU_15  | 48      | 284     | 87      | 0       | 32      | 14      | 64      |
| OTU_16  | 7       | 482     | 514     | 195     | 106     | 0       | 643     |
| OTU_167 | 18      | 0       | 6       | 2       | 0       | 3       | 0       |
| OTU_168 | 100     | 99      | 76      | 79      | 92      | 111     | 57      |
| OTU_17  | 11      | 260     | 78      | 267     | 27      | 6       | 34      |
| OTU_18  | 67      | 44      | 5       | 88      | 74      | 407     | 72      |
| OTU_19  | 339     | 475     | 192     | 425     | 303     | 428     | 379     |
| OTU_2   | 2001    | 500     | 1649    | 1162    | 833     | 2165    | 789     |
| OTU_20  | 231     | 102     | 26      | 87      | 95      | 158     | 65      |
| OTU_21  | 278     | 170     | 81      | 126     | 630     | 369     | 190     |
| OTU_22  | 30      | 793     | 632     | 355     | 71      | 39      | 313     |
| OTU_23  | 424     | 503     | 260     | 367     | 160     | 345     | 224     |
| OTU_24  | 117     | 114     | 94      | 115     | 71      | 73      | 249     |
| OTU_25  | 112     | 178     | 210     | 192     | 257     | 44      | 55      |
| OTU_253 | 0       | 140     | 19      | 69      | 82      | 34      | 17      |
| OTU_257 | 0       | 106     | 0       | 69      | 57      | 23      | 146     |
| OTU_26  | 311     | 222     | 178     | 71      | 143     | 72      | 41      |
| OTU_262 | 50      | 154     | 77      | 140     | 115     | 113     | 146     |
| OTU_265 | 0       | 19      | 75      | 36      | 47      | 0       | 25      |
| OTU_27  | 0       | 2       | 219     | 0       | 0       | 0       | 0       |
| OTU_28  | 4       | 163     | 66      | 123     | 114     | 47      | 219     |
| OTU_284 | 33      | 61      | 20      | 33      | 50      | 20      | 36      |
| OTU_29  | 307     | 376     | 207     | 152     | 201     | 190     | 136     |

|         |      |     |     |      |     |      |      |
|---------|------|-----|-----|------|-----|------|------|
| OTU_3   | 6368 | 0   | 277 | 1873 | 2   | 6055 | 1099 |
| OTU_30  | 92   | 165 | 83  | 202  | 218 | 22   | 64   |
| OTU_31  | 37   | 23  | 5   | 35   | 11  | 14   | 11   |
| OTU_314 | 131  | 142 | 127 | 344  | 916 | 440  | 1299 |
| OTU_317 | 155  | 286 | 81  | 240  | 277 | 253  | 210  |
| OTU_32  | 153  | 107 | 116 | 110  | 727 | 298  | 434  |
| OTU_320 | 0    | 44  | 23  | 46   | 34  | 33   | 85   |
| OTU_33  | 3    | 171 | 159 | 166  | 385 | 138  | 153  |
| OTU_331 | 230  | 198 | 115 | 168  | 150 | 146  | 116  |
| OTU_34  | 384  | 252 | 25  | 168  | 390 | 166  | 102  |
| OTU_345 | 0    | 3   | 68  | 23   | 8   | 72   | 43   |
| OTU_35  | 142  | 107 | 62  | 59   | 169 | 84   | 93   |
| OTU_36  | 111  | 2   | 14  | 2    | 8   | 55   | 0    |
| OTU_37  | 0    | 33  | 0   | 14   | 14  | 0    | 78   |
| OTU_38  | 24   | 87  | 179 | 73   | 66  | 30   | 221  |
| OTU_39  | 595  | 43  | 59  | 40   | 20  | 8    | 12   |
| OTU_4   | 2    | 809 | 6   | 428  | 746 | 74   | 791  |
| OTU_40  | 44   | 0   | 0   | 0    | 36  | 0    | 240  |
| OTU_41  | 165  | 168 | 152 | 222  | 187 | 212  | 175  |
| OTU_42  | 3    | 194 | 83  | 56   | 169 | 35   | 106  |
| OTU_43  | 0    | 0   | 2   | 0    | 20  | 0    | 13   |
| OTU_44  | 30   | 36  | 51  | 86   | 193 | 106  | 335  |
| OTU_45  | 283  | 350 | 99  | 209  | 201 | 400  | 177  |
| OTU_46  | 83   | 80  | 7   | 67   | 46  | 20   | 104  |
| OTU_47  | 109  | 141 | 57  | 98   | 276 | 82   | 143  |
| OTU_48  | 25   | 127 | 102 | 89   | 165 | 95   | 110  |
| OTU_49  | 47   | 74  | 44  | 67   | 29  | 23   | 35   |
| OTU_5   | 209  | 400 | 166 | 118  | 19  | 3    | 77   |
| OTU_50  | 72   | 45  | 23  | 217  | 144 | 91   | 78   |
| OTU_51  | 70   | 131 | 14  | 120  | 119 | 52   | 169  |
| OTU_52  | 346  | 38  | 47  | 27   | 157 | 42   | 72   |
| OTU_53  | 371  | 152 | 52  | 133  | 102 | 156  | 171  |
| OTU_54  | 10   | 6   | 4   | 11   | 235 | 50   | 40   |
| OTU_55  | 42   | 36  | 65  | 50   | 100 | 85   | 54   |
| OTU_56  | 88   | 229 | 63  | 82   | 41  | 124  | 22   |
| OTU_57  | 33   | 3   | 28  | 20   | 162 | 36   | 71   |
| OTU_58  | 0    | 80  | 2   | 4    | 27  | 9    | 204  |
| OTU_59  | 114  | 233 | 103 | 172  | 206 | 88   | 113  |
| OTU_6   | 499  | 826 | 181 | 464  | 323 | 347  | 523  |
| OTU_60  | 69   | 117 | 25  | 37   | 80  | 2    | 46   |
| OTU_61  | 220  | 79  | 67  | 114  | 27  | 156  | 31   |
| OTU_62  | 49   | 40  | 21  | 24   | 140 | 63   | 34   |
| OTU_63  | 435  | 369 | 249 | 363  | 503 | 383  | 367  |
| OTU_64  | 22   | 53  | 12  | 34   | 118 | 24   | 88   |
| OTU_65  | 61   | 125 | 64  | 98   | 183 | 60   | 104  |
| OTU_66  | 21   | 86  | 37  | 21   | 152 | 88   | 56   |
| OTU_67  | 73   | 26  | 47  | 41   | 107 | 60   | 112  |
| OTU_68  | 0    | 0   | 0   | 0    | 0   | 0    | 0    |
| OTU_69  | 182  | 100 | 69  | 73   | 96  | 42   | 68   |
| OTU_7   | 502  | 644 | 660 | 476  | 972 | 515  | 666  |

|                        |              |              |              |              |              |              |              |
|------------------------|--------------|--------------|--------------|--------------|--------------|--------------|--------------|
| OTU_70                 | 17           | 49           | 4            | 32           | 15           | 9            | 25           |
| OTU_71                 | 9            | 144          | 12           | 35           | 152          | 44           | 68           |
| OTU_72                 | 28           | 69           | 0            | 24           | 12           | 0            | 251          |
| OTU_73                 | 0            | 82           | 0            | 0            | 147          | 61           | 126          |
| OTU_74                 | 216          | 280          | 45           | 325          | 148          | 266          | 168          |
| OTU_75                 | 241          | 230          | 34           | 68           | 78           | 128          | 144          |
| OTU_76                 | 26           | 55           | 45           | 45           | 18           | 27           | 50           |
| OTU_77                 | 331          | 323          | 63           | 274          | 305          | 200          | 295          |
| OTU_78                 | 39           | 42           | 30           | 32           | 19           | 8            | 15           |
| OTU_79                 | 64           | 90           | 27           | 50           | 107          | 116          | 52           |
| OTU_8                  | 128          | 187          | 77           | 56           | 0            | 0            | 0            |
| OTU_80                 | 27           | 19           | 13           | 116          | 172          | 178          | 72           |
| OTU_81                 | 80           | 43           | 26           | 30           | 133          | 35           | 72           |
| OTU_82                 | 23           | 16           | 17           | 5            | 43           | 61           | 60           |
| OTU_83                 | 21           | 111          | 0            | 40           | 86           | 73           | 96           |
| OTU_84                 | 0            | 166          | 0            | 107          | 60           | 33           | 224          |
| OTU_85                 | 110          | 105          | 76           | 90           | 139          | 97           | 161          |
| OTU_86                 | 54           | 78           | 24           | 15           | 108          | 72           | 121          |
| OTU_87                 | 54           | 117          | 45           | 66           | 56           | 29           | 45           |
| OTU_88                 | 325          | 59           | 3            | 86           | 7            | 31           | 10           |
| OTU_89                 | 112          | 59           | 76           | 78           | 66           | 70           | 35           |
| OTU_9                  | 6            | 581          | 77           | 78           | 0            | 0            | 2            |
| OTU_90                 | 0            | 59           | 0            | 32           | 119          | 67           | 62           |
| OTU_91                 | 0            | 57           | 60           | 24           | 24           | 0            | 46           |
| OTU_92                 | 32           | 36           | 29           | 25           | 48           | 57           | 32           |
| OTU_93                 | 86           | 96           | 50           | 69           | 56           | 26           | 21           |
| OTU_94                 | 101          | 144          | 118          | 74           | 54           | 69           | 63           |
| OTU_95                 | 11           | 28           | 15           | 9            | 9            | 10           | 19           |
| OTU_96                 | 111          | 53           | 34           | 67           | 89           | 94           | 50           |
| OTU_97                 | 29           | 20           | 0            | 20           | 27           | 12           | 26           |
| OTU_98                 | 8            | 3            | 4            | 11           | 28           | 3            | 47           |
| OTU_99                 | 75           | 66           | 28           | 49           | 48           | 57           | 68           |
| <b>Read per sample</b> | <b>22424</b> | <b>21000</b> | <b>13854</b> | <b>17165</b> | <b>20805</b> | <b>20103</b> | <b>19391</b> |

| SPF.496 | SPF.497 | SPF.498 | SPF.499 | SPF.500 | SPF.501 | SPF.502 | SPF.503 | SPF.504 |
|---------|---------|---------|---------|---------|---------|---------|---------|---------|
| 1571    | 2579    | 3707    | 1034    | 1281    | 1441    | 1372    | 902     | 777     |
| 697     | 725     | 1093    | 382     | 472     | 887     | 878     | 555     | 629     |
| 48      | 30      | 21      | 32      | 26      | 21      | 28      | 22      | 39      |
| 0       | 44      | 2       | 0       | 85      | 50      | 63      | 43      | 119     |
| 160     | 84      | 49      | 34      | 31      | 49      | 83      | 43      | 66      |
| 62      | 40      | 88      | 45      | 62      | 66      | 63      | 58      | 88      |
| 106     | 52      | 95      | 22      | 37      | 8       | 19      | 8       | 37      |
| 81      | 42      | 20      | 5       | 10      | 10      | 41      | 14      | 10      |
| 192     | 35      | 61      | 25      | 28      | 14      | 28      | 14      | 24      |
| 0       | 31      | 9       | 43      | 30      | 9       | 11      | 6       | 64      |
| 11      | 314     | 1151    | 361     | 90      | 286     | 691     | 334     | 452     |
| 36      | 13      | 42      | 13      | 4       | 4       | 16      | 3       | 21      |
| 204     | 30      | 60      | 39      | 32      | 49      | 88      | 44      | 31      |
| 0       | 0       | 36      | 3       | 14      | 0       | 0       | 28      | 87      |
| 0       | 72      | 0       | 74      | 9       | 2       | 15      | 0       | 55      |
| 887     | 162     | 228     | 311     | 67      | 226     | 156     | 91      | 78      |
| 110     | 9       | 111     | 99      | 75      | 63      | 61      | 37      | 72      |
| 29      | 37      | 11      | 16      | 33      | 23      | 47      | 24      | 29      |
| 69      | 79      | 85      | 63      | 86      | 38      | 80      | 31      | 90      |
| 24      | 246     | 338     | 9       | 274     | 20      | 112     | 20      | 207     |
| 47      | 68      | 34      | 19      | 33      | 37      | 73      | 33      | 124     |
| 27      | 2       | 17      | 8       | 0       | 0       | 0       | 0       | 0       |
| 61      | 36      | 35      | 21      | 34      | 36      | 70      | 42      | 60      |
| 0       | 0       | 2       | 195     | 278     | 0       | 0       | 0       | 0       |
| 46      | 20      | 2       | 9       | 14      | 4       | 20      | 10      | 10      |
| 180     | 67      | 14      | 7       | 11      | 7       | 45      | 6       | 42      |
| 131     | 34      | 44      | 31      | 274     | 42      | 39      | 53      | 375     |
| 265     | 2208    | 154     | 305     | 674     | 10      | 22      | 11      | 1990    |
| 3       | 32      | 6       | 8       | 0       | 7       | 8       | 4       | 29      |
| 13      | 72      | 55      | 56      | 181     | 64      | 59      | 80      | 154     |
| 36      | 529     | 24      | 40      | 255     | 226     | 450     | 645     | 500     |
| 22      | 159     | 109     | 293     | 115     | 32      | 7       | 5       | 31      |
| 343     | 578     | 541     | 77      | 157     | 202     | 286     | 173     | 556     |
| 346     | 725     | 3071    | 3392    | 1207    | 1947    | 1282    | 1693    | 61      |
| 166     | 152     | 115     | 124     | 141     | 34      | 72      | 47      | 105     |
| 1012    | 38      | 298     | 40      | 12      | 3       | 37      | 0       | 3       |
| 212     | 29      | 94      | 141     | 76      | 150     | 525     | 249     | 448     |
| 429     | 371     | 421     | 152     | 110     | 156     | 344     | 315     | 416     |
| 239     | 273     | 85      | 194     | 162     | 48      | 124     | 51      | 113     |
| 48      | 150     | 53      | 192     | 167     | 233     | 277     | 276     | 360     |
| 145     | 108     | 59      | 18      | 115     | 170     | 198     | 19      | 113     |
| 151     | 2       | 108     | 57      | 25      | 0       | 17      | 0       | 0       |
| 541     | 59      | 572     | 154     | 84      | 76      | 253     | 244     | 169     |
| 7       | 30      | 122     | 39      | 53      | 24      | 25      | 43      | 64      |
| 9       | 0       | 173     | 216     | 0       | 0       | 0       | 0       | 0       |
| 0       | 0       | 0       | 629     | 0       | 0       | 0       | 0       | 0       |
| 105     | 0       | 177     | 4       | 134     | 29      | 15      | 0       | 0       |
| 81      | 30      | 50      | 28      | 41      | 21      | 45      | 34      | 127     |
| 224     | 119     | 246     | 121     | 109     | 77      | 155     | 189     | 348     |

|      |      |     |     |      |      |      |      |     |
|------|------|-----|-----|------|------|------|------|-----|
| 0    | 2005 | 0   | 0   | 3746 | 5452 | 3858 | 5640 | 188 |
| 9    | 274  | 112 | 312 | 108  | 48   | 236  | 101  | 122 |
| 25   | 62   | 22  | 14  | 18   | 82   | 76   | 79   | 40  |
| 0    | 659  | 48  | 998 | 43   | 0    | 109  | 56   | 12  |
| 331  | 131  | 294 | 157 | 265  | 87   | 261  | 131  | 106 |
| 189  | 120  | 281 | 50  | 88   | 27   | 62   | 59   | 76  |
| 39   | 0    | 72  | 0   | 56   | 14   | 4    | 0    | 0   |
| 189  | 82   | 126 | 14  | 17   | 19   | 38   | 6    | 51  |
| 188  | 180  | 189 | 119 | 208  | 101  | 172  | 127  | 251 |
| 97   | 453  | 277 | 28  | 186  | 249  | 209  | 79   | 120 |
| 30   | 13   | 70  | 177 | 80   | 0    | 14   | 13   | 9   |
| 58   | 93   | 76  | 32  | 75   | 22   | 54   | 56   | 117 |
| 69   | 20   | 173 | 173 | 317  | 15   | 18   | 0    | 110 |
| 0    | 5    | 11  | 406 | 0    | 46   | 181  | 96   | 0   |
| 100  | 13   | 177 | 26  | 50   | 97   | 454  | 336  | 221 |
| 623  | 0    | 205 | 0   | 50   | 0    | 0    | 0    | 0   |
| 0    | 11   | 14  | 572 | 161  | 10   | 20   | 3    | 639 |
| 15   | 6    | 11  | 13  | 0    | 2    | 0    | 0    | 0   |
| 207  | 360  | 191 | 430 | 173  | 172  | 252  | 142  | 277 |
| 95   | 32   | 144 | 31  | 93   | 38   | 77   | 17   | 37  |
| 9    | 0    | 0   | 72  | 4    | 2    | 2    | 0    | 0   |
| 0    | 155  | 16  | 244 | 9    | 0    | 23   | 24   | 4   |
| 185  | 145  | 335 | 24  | 227  | 153  | 197  | 157  | 170 |
| 287  | 413  | 175 | 56  | 53   | 78   | 54   | 25   | 55  |
| 70   | 94   | 161 | 56  | 96   | 92   | 138  | 94   | 196 |
| 85   | 363  | 124 | 385 | 349  | 216  | 252  | 171  | 326 |
| 367  | 138  | 175 | 22  | 47   | 18   | 64   | 12   | 87  |
| 2927 | 8    | 126 | 261 | 255  | 16   | 23   | 60   | 91  |
| 109  | 56   | 186 | 84  | 100  | 252  | 114  | 199  | 41  |
| 124  | 155  | 230 | 246 | 117  | 53   | 116  | 23   | 383 |
| 77   | 42   | 22  | 27  | 52   | 52   | 124  | 29   | 53  |
| 184  | 50   | 216 | 56  | 128  | 76   | 129  | 156  | 221 |
| 0    | 7    | 6   | 2   | 40   | 13   | 25   | 58   | 320 |
| 60   | 131  | 90  | 312 | 93   | 37   | 76   | 46   | 146 |
| 45   | 155  | 292 | 45  | 129  | 91   | 135  | 52   | 359 |
| 11   | 43   | 4   | 71  | 25   | 0    | 2    | 3    | 0   |
| 0    | 3    | 39  | 58  | 8    | 80   | 90   | 10   | 80  |
| 294  | 39   | 161 | 45  | 227  | 196  | 270  | 178  | 374 |
| 0    | 1449 | 559 | 305 | 782  | 478  | 890  | 455  | 878 |
| 0    | 304  | 46  | 23  | 39   | 57   | 74   | 71   | 173 |
| 253  | 252  | 105 | 53  | 57   | 109  | 178  | 130  | 190 |
| 65   | 43   | 63  | 45  | 13   | 22   | 39   | 6    | 18  |
| 437  | 559  | 407 | 357 | 487  | 393  | 489  | 426  | 679 |
| 175  | 59   | 218 | 105 | 13   | 20   | 38   | 45   | 11  |
| 169  | 163  | 83  | 243 | 36   | 43   | 51   | 36   | 174 |
| 74   | 49   | 39  | 25  | 37   | 28   | 56   | 20   | 80  |
| 38   | 82   | 80  | 32  | 46   | 115  | 91   | 55   | 73  |
| 0    | 0    | 0   | 0   | 0    | 0    | 0    | 0    | 0   |
| 131  | 38   | 93  | 30  | 90   | 138  | 188  | 133  | 243 |
| 1270 | 404  | 376 | 139 | 383  | 175  | 302  | 236  | 485 |

|              |              |              |              |              |              |              |              |              |
|--------------|--------------|--------------|--------------|--------------|--------------|--------------|--------------|--------------|
| 51           | 14           | 37           | 37           | 12           | 4            | 12           | 3            | 2            |
| 61           | 90           | 18           | 27           | 2            | 24           | 7            | 17           | 4            |
| 28           | 2            | 0            | 0            | 0            | 2            | 185          | 0            | 0            |
| 42           | 63           | 10           | 0            | 92           | 27           | 88           | 59           | 128          |
| 261          | 129          | 294          | 75           | 135          | 203          | 275          | 149          | 353          |
| 109          | 173          | 145          | 49           | 28           | 47           | 47           | 29           | 11           |
| 145          | 44           | 58           | 30           | 52           | 49           | 49           | 22           | 268          |
| 0            | 83           | 308          | 112          | 97           | 366          | 450          | 220          | 318          |
| 149          | 63           | 32           | 21           | 19           | 40           | 60           | 29           | 52           |
| 52           | 98           | 64           | 17           | 41           | 27           | 78           | 28           | 42           |
| 0            | 78           | 1191         | 198          | 407          | 259          | 203          | 344          | 1143         |
| 56           | 115          | 54           | 17           | 21           | 24           | 105          | 33           | 26           |
| 62           | 16           | 48           | 11           | 22           | 26           | 32           | 17           | 39           |
| 2            | 68           | 14           | 188          | 7            | 27           | 41           | 27           | 62           |
| 101          | 102          | 31           | 10           | 29           | 9            | 22           | 3            | 42           |
| 239          | 3            | 144          | 54           | 26           | 0            | 34           | 0            | 0            |
| 165          | 119          | 86           | 64           | 87           | 77           | 108          | 53           | 95           |
| 58           | 46           | 80           | 23           | 21           | 42           | 44           | 33           | 22           |
| 91           | 26           | 44           | 37           | 26           | 14           | 63           | 16           | 60           |
| 208          | 6            | 190          | 13           | 30           | 9            | 22           | 19           | 16           |
| 89           | 38           | 83           | 28           | 48           | 53           | 118          | 70           | 70           |
| 97           | 442          | 0            | 52           | 367          | 200          | 301          | 36           | 418          |
| 30           | 38           | 69           | 33           | 10           | 42           | 49           | 30           | 26           |
| 0            | 0            | 0            | 30           | 150          | 0            | 0            | 0            | 0            |
| 99           | 28           | 53           | 29           | 61           | 36           | 61           | 37           | 51           |
| 167          | 46           | 52           | 10           | 19           | 10           | 32           | 5            | 60           |
| 201          | 38           | 42           | 18           | 124          | 15           | 27           | 20           | 18           |
| 133          | 17           | 14           | 4            | 10           | 10           | 25           | 9            | 13           |
| 38           | 57           | 81           | 25           | 76           | 62           | 60           | 40           | 52           |
| 19           | 47           | 28           | 12           | 7            | 15           | 25           | 20           | 33           |
| 134          | 0            | 19           | 7            | 0            | 2            | 4            | 2            | 3            |
| 51           | 111          | 78           | 93           | 87           | 37           | 50           | 82           | 67           |
| <b>21824</b> | <b>22633</b> | <b>24175</b> | <b>17479</b> | <b>18997</b> | <b>18143</b> | <b>21302</b> | <b>17802</b> | <b>20953</b> |



| SPF.505 | SPF.506 | SPF.507 | SPF.508 | SPF.510 | SPF.511 | SPF.512 | SPF.513 | SPF.514 |
|---------|---------|---------|---------|---------|---------|---------|---------|---------|
| 1148    | 633     | 612     | 851     | 2725    | 2923    | 2512    | 4959    | 3264    |
| 901     | 341     | 296     | 1039    | 1077    | 1037    | 744     | 1217    | 967     |
| 27      | 21      | 12      | 40      | 51      | 41      | 38      | 80      | 6       |
| 11      | 10      | 4       | 8       | 0       | 0       | 0       | 0       | 34      |
| 58      | 57      | 41      | 24      | 73      | 54      | 29      | 43      | 75      |
| 113     | 68      | 41      | 66      | 124     | 111     | 59      | 162     | 100     |
| 27      | 17      | 18      | 45      | 40      | 31      | 77      | 46      | 35      |
| 19      | 4       | 11      | 12      | 57      | 53      | 39      | 32      | 5       |
| 9       | 16      | 18      | 38      | 96      | 95      | 67      | 60      | 55      |
| 29      | 57      | 0       | 15      | 14      | 26      | 26      | 6       | 11      |
| 254     | 427     | 110     | 177     | 397     | 633     | 1398    | 678     | 258     |
| 7       | 10      | 0       | 2       | 4       | 43      | 11      | 8       | 10      |
| 42      | 23      | 92      | 34      | 53      | 66      | 98      | 110     | 65      |
| 35      | 3       | 7       | 3       | 25      | 33      | 37      | 21      | 0       |
| 0       | 27      | 0       | 0       | 0       | 0       | 0       | 0       | 0       |
| 71      | 90      | 202     | 1268    | 50      | 93      | 288     | 122     | 69      |
| 116     | 134     | 82      | 42      | 137     | 61      | 122     | 87      | 53      |
| 32      | 13      | 0       | 19      | 55      | 68      | 9       | 36      | 0       |
| 80      | 31      | 33      | 29      | 73      | 62      | 134     | 45      | 94      |
| 196     | 59      | 88      | 165     | 59      | 478     | 110     | 144     | 96      |
| 31      | 82      | 26      | 44      | 55      | 53      | 44      | 40      | 40      |
| 0       | 37      | 18      | 5       | 4       | 2       | 24      | 3       | 52      |
| 46      | 51      | 33      | 85      | 61      | 56      | 55      | 55      | 55      |
| 1160    | 134     | 0       | 0       | 4       | 191     | 68      | 8       | 0       |
| 6       | 11      | 7       | 43      | 64      | 23      | 9       | 20      | 6       |
| 11      | 22      | 4       | 25      | 16      | 11      | 2       | 7       | 38      |
| 63      | 61      | 37      | 82      | 256     | 328     | 127     | 479     | 277     |
| 25      | 1851    | 3       | 8       | 404     | 412     | 500     | 17      | 83      |
| 6       | 2       | 15      | 5       | 10      | 164     | 14      | 7       | 14      |
| 79      | 79      | 42      | 54      | 60      | 42      | 84      | 125     | 74      |
| 942     | 31      | 547     | 197     | 12      | 47      | 39      | 29      | 143     |
| 2       | 23      | 37      | 9       | 52      | 67      | 50      | 11      | 31      |
| 148     | 411     | 212     | 44      | 697     | 421     | 464     | 313     | 442     |
| 1667    | 1636    | 3620    | 3181    | 601     | 2113    | 1165    | 12      | 668     |
| 112     | 121     | 87      | 94      | 121     | 253     | 109     | 221     | 336     |
| 0       | 14      | 39      | 71      | 15      | 116     | 468     | 0       | 251     |
| 307     | 174     | 102     | 18      | 676     | 75      | 147     | 82      | 285     |
| 561     | 251     | 227     | 84      | 330     | 283     | 320     | 96      | 936     |
| 107     | 215     | 28      | 64      | 50      | 454     | 190     | 111     | 724     |
| 117     | 96      | 130     | 61      | 364     | 157     | 713     | 328     | 18      |
| 421     | 50      | 0       | 0       | 83      | 90      | 18      | 397     | 2       |
| 0       | 263     | 0       | 0       | 101     | 95      | 106     | 110     | 108     |
| 249     | 73      | 137     | 248     | 50      | 365     | 162     | 120     | 1035    |
| 54      | 33      | 25      | 16      | 139     | 239     | 281     | 73      | 141     |
| 0       | 0       | 0       | 0       | 25      | 113     | 49      | 0       | 16      |
| 0       | 0       | 0       | 0       | 0       | 0       | 0       | 0       | 85      |
| 16      | 56      | 0       | 6       | 275     | 196     | 62      | 438     | 424     |
| 42      | 41      | 10      | 46      | 37      | 44      | 53      | 61      | 21      |
| 325     | 122     | 204     | 38      | 329     | 510     | 361     | 49      | 264     |

|      |      |       |      |      |      |      |      |      |
|------|------|-------|------|------|------|------|------|------|
| 4901 | 4980 | 10220 | 8761 | 5    | 0    | 0    | 2    | 492  |
| 224  | 223  | 109   | 268  | 80   | 194  | 138  | 245  | 43   |
| 229  | 53   | 19    | 53   | 25   | 13   | 44   | 33   | 969  |
| 614  | 53   | 119   | 92   | 20   | 300  | 1313 | 0    | 40   |
| 178  | 77   | 46    | 136  | 409  | 214  | 366  | 806  | 1504 |
| 33   | 70   | 73    | 223  | 186  | 70   | 207  | 343  | 355  |
| 9    | 18   | 0     | 4    | 90   | 82   | 33   | 152  | 190  |
| 11   | 33   | 0     | 7    | 186  | 130  | 70   | 66   | 0    |
| 279  | 233  | 153   | 242  | 149  | 166  | 170  | 208  | 164  |
| 287  | 60   | 144   | 315  | 67   | 32   | 83   | 204  | 433  |
| 3    | 185  | 15    | 4    | 111  | 163  | 174  | 28   | 7    |
| 25   | 54   | 51    | 59   | 96   | 70   | 107  | 29   | 81   |
| 0    | 526  | 0     | 7    | 231  | 123  | 0    | 49   | 19   |
| 35   | 13   | 0     | 0    | 7    | 48   | 37   | 4    | 9    |
| 322  | 26   | 2     | 17   | 106  | 46   | 109  | 104  | 87   |
| 0    | 0    | 401   | 459  | 2    | 60   | 64   | 0    | 252  |
| 5    | 13   | 0     | 3    | 2534 | 12   | 29   | 3058 | 0    |
| 0    | 135  | 67    | 11   | 5    | 0    | 0    | 6    | 14   |
| 397  | 380  | 225   | 234  | 170  | 107  | 181  | 182  | 224  |
| 133  | 30   | 6     | 7    | 154  | 405  | 273  | 306  | 72   |
| 0    | 2    | 17    | 17   | 479  | 389  | 416  | 507  | 7    |
| 138  | 18   | 25    | 22   | 7    | 87   | 377  | 0    | 15   |
| 513  | 120  | 104   | 98   | 161  | 132  | 240  | 45   | 52   |
| 72   | 147  | 48    | 88   | 30   | 109  | 116  | 50   | 0    |
| 157  | 143  | 27    | 115  | 137  | 205  | 181  | 414  | 159  |
| 246  | 219  | 33    | 50   | 43   | 158  | 181  | 186  | 217  |
| 18   | 67   | 35    | 84   | 18   | 29   | 24   | 38   | 53   |
| 51   | 77   | 96    | 85   | 76   | 82   | 106  | 127  | 1794 |
| 249  | 52   | 90    | 61   | 229  | 169  | 350  | 149  | 118  |
| 83   | 25   | 39    | 34   | 37   | 175  | 105  | 178  | 334  |
| 54   | 31   | 222   | 106  | 192  | 391  | 59   | 79   | 290  |
| 167  | 62   | 29    | 210  | 111  | 165  | 298  | 182  | 137  |
| 20   | 10   | 3     | 6    | 0    | 25   | 0    | 6    | 4    |
| 35   | 63   | 25    | 66   | 96   | 33   | 58   | 57   | 129  |
| 311  | 277  | 33    | 47   | 4    | 58   | 223  | 45   | 0    |
| 0    | 6    | 24    | 86   | 40   | 106  | 38   | 9    | 32   |
| 13   | 30   | 0     | 0    | 37   | 29   | 40   | 55   | 15   |
| 258  | 70   | 193   | 249  | 84   | 141  | 88   | 121  | 116  |
| 522  | 318  | 141   | 521  | 1113 | 1192 | 828  | 1285 | 0    |
| 9    | 154  | 37    | 58   | 282  | 108  | 132  | 249  | 17   |
| 127  | 184  | 122   | 130  | 24   | 144  | 258  | 13   | 63   |
| 26   | 17   | 48    | 144  | 52   | 70   | 103  | 73   | 40   |
| 961  | 593  | 262   | 509  | 491  | 410  | 411  | 611  | 346  |
| 52   | 17   | 28    | 29   | 74   | 88   | 118  | 252  | 59   |
| 189  | 273  | 54    | 27   | 216  | 159  | 157  | 19   | 28   |
| 27   | 38   | 23    | 78   | 114  | 57   | 46   | 62   | 16   |
| 86   | 42   | 51    | 114  | 239  | 172  | 127  | 53   | 85   |
| 0    | 0    | 0     | 0    | 0    | 0    | 0    | 0    | 0    |
| 163  | 50   | 104   | 70   | 31   | 83   | 81   | 122  | 60   |
| 182  | 220  | 213   | 597  | 685  | 912  | 601  | 324  | 257  |

|              |              |              |              |              |              |              |              |              |
|--------------|--------------|--------------|--------------|--------------|--------------|--------------|--------------|--------------|
| 34           | 0            | 23           | 19           | 32           | 123          | 65           | 88           | 230          |
| 114          | 40           | 0            | 5            | 78           | 54           | 48           | 13           | 22           |
| 10           | 0            | 8            | 70           | 6            | 118          | 86           | 3            | 36           |
| 124          | 23           | 0            | 0            | 84           | 19           | 36           | 171          | 11           |
| 347          | 197          | 166          | 330          | 132          | 295          | 241          | 348          | 727          |
| 40           | 128          | 157          | 48           | 102          | 142          | 232          | 13           | 213          |
| 128          | 43           | 3            | 6            | 49           | 29           | 36           | 63           | 77           |
| 373          | 86           | 183          | 324          | 113          | 94           | 302          | 152          | 69           |
| 28           | 27           | 13           | 56           | 21           | 46           | 48           | 30           | 70           |
| 19           | 39           | 18           | 50           | 101          | 6            | 31           | 25           | 10           |
| 33           | 718          | 0            | 20           | 619          | 1866         | 510          | 556          | 0            |
| 120          | 42           | 38           | 25           | 27           | 16           | 52           | 3            | 13           |
| 28           | 21           | 24           | 23           | 56           | 43           | 26           | 51           | 24           |
| 101          | 58           | 37           | 37           | 31           | 91           | 57           | 13           | 8            |
| 18           | 15           | 5            | 6            | 89           | 34           | 65           | 20           | 0            |
| 0            | 341          | 0            | 0            | 175          | 138          | 147          | 146          | 166          |
| 129          | 99           | 90           | 13           | 105          | 184          | 158          | 69           | 46           |
| 17           | 36           | 26           | 80           | 76           | 98           | 42           | 135          | 55           |
| 15           | 36           | 27           | 35           | 101          | 63           | 30           | 78           | 28           |
| 17           | 26           | 108          | 221          | 28           | 0            | 59           | 10           | 359          |
| 76           | 120          | 24           | 42           | 71           | 57           | 148          | 52           | 115          |
| 131          | 176          | 0            | 2            | 7            | 501          | 230          | 0            | 0            |
| 45           | 13           | 0            | 0            | 0            | 0            | 0            | 0            | 0            |
| 0            | 0            | 0            | 0            | 37           | 58           | 54           | 69           | 0            |
| 54           | 24           | 38           | 42           | 48           | 55           | 38           | 51           | 52           |
| 7            | 37           | 50           | 36           | 56           | 80           | 69           | 65           | 44           |
| 12           | 38           | 97           | 49           | 28           | 34           | 73           | 23           | 185          |
| 13           | 12           | 4            | 17           | 45           | 21           | 12           | 20           | 9            |
| 66           | 43           | 61           | 86           | 86           | 64           | 81           | 116          | 59           |
| 27           | 4            | 19           | 37           | 28           | 10           | 15           | 76           | 19           |
| 7            | 0            | 0            | 30           | 0            | 5            | 63           | 2            | 68           |
| 162          | 142          | 71           | 64           | 68           | 63           | 83           | 155          | 51           |
| <b>24381</b> | <b>21052</b> | <b>22323</b> | <b>24781</b> | <b>22235</b> | <b>25348</b> | <b>23779</b> | <b>24820</b> | <b>23930</b> |

| SPF.515 | SPF.517 | SPF.518 | SPF.519 | SPF.520 | SPF.524 | SPF.526 | SPF.527 | SPF.535 |
|---------|---------|---------|---------|---------|---------|---------|---------|---------|
| 748     | 1240    | 632     | 373     | 1027    | 95      | 1752    | 2608    | 997     |
| 954     | 574     | 1671    | 1452    | 649     | 880     | 1115    | 903     | 684     |
| 11      | 29      | 157     | 57      | 28      | 65      | 73      | 62      | 49      |
| 22      | 42      | 8       | 14      | 11      | 2       | 26      | 26      | 19      |
| 35      | 21      | 62      | 44      | 62      | 68      | 40      | 53      | 37      |
| 72      | 58      | 228     | 126     | 157     | 214     | 103     | 100     | 52      |
| 41      | 63      | 41      | 43      | 80      | 96      | 241     | 126     | 63      |
| 34      | 37      | 98      | 106     | 41      | 115     | 105     | 86      | 52      |
| 51      | 64      | 91      | 104     | 121     | 187     | 195     | 171     | 44      |
| 20      | 23      | 35      | 74      | 28      | 69      | 24      | 42      | 100     |
| 187     | 152     | 19      | 15      | 112     | 669     | 625     | 894     | 390     |
| 0       | 28      | 9       | 18      | 0       | 11      | 134     | 66      | 10      |
| 72      | 63      | 12      | 50      | 45      | 25      | 110     | 147     | 25      |
| 31      | 0       | 12      | 0       | 0       | 10      | 0       | 6       | 90      |
| 36      | 36      | 3       | 10      | 0       | 34      | 20      | 139     | 60      |
| 112     | 38      | 31      | 17      | 166     | 43      | 43      | 223     | 174     |
| 158     | 33      | 37      | 31      | 57      | 12      | 32      | 29      | 63      |
| 24      | 60      | 54      | 80      | 25      | 23      | 167     | 59      | 74      |
| 51      | 32      | 44      | 16      | 12      | 23      | 42      | 13      | 39      |
| 109     | 58      | 9       | 10      | 51      | 0       | 194     | 14      | 123     |
| 51      | 16      | 22      | 19      | 17      | 22      | 10      | 50      | 96      |
| 63      | 0       | 30      | 57      | 13      | 36      | 4       | 2       | 141     |
| 33      | 39      | 121     | 134     | 54      | 70      | 67      | 49      | 35      |
| 11      | 2       | 8       | 4       | 42      | 91      | 4       | 0       | 42      |
| 29      | 23      | 119     | 119     | 32      | 118     | 56      | 17      | 29      |
| 29      | 2       | 15      | 62      | 0       | 7       | 13      | 0       | 23      |
| 55      | 126     | 1033    | 583     | 32      | 306     | 391     | 128     | 41      |
| 50      | 102     | 23      | 50      | 4       | 20      | 41      | 397     | 590     |
| 7       | 92      | 19      | 48      | 6       | 30      | 11      | 45      | 5       |
| 40      | 33      | 54      | 46      | 58      | 37      | 81      | 70      | 40      |
| 264     | 354     | 23      | 141     | 21      | 28      | 63      | 82      | 8       |
| 124     | 106     | 114     | 13      | 78      | 1098    | 11      | 128     | 165     |
| 748     | 356     | 208     | 50      | 145     | 926     | 51      | 354     | 465     |
| 2458    | 1664    | 3       | 204     | 2199    | 18      | 730     | 546     | 302     |
| 88      | 16      | 240     | 825     | 75      | 25      | 70      | 106     | 224     |
| 48      | 58      | 219     | 345     | 205     | 531     | 22      | 112     | 24      |
| 16      | 199     | 2       | 2       | 0       | 0       | 44      | 53      | 229     |
| 418     | 274     | 272     | 411     | 212     | 675     | 34      | 433     | 529     |
| 174     | 88      | 75      | 57      | 63      | 48      | 137     | 135     | 51      |
| 175     | 14      | 88      | 63      | 32      | 30      | 19      | 26      | 252     |
| 91      | 64      | 18      | 0       | 0       | 22      | 96      | 62      | 111     |
| 29      | 62      | 85      | 27      | 9       | 41      | 65      | 84      | 24      |
| 112     | 274     | 86      | 31      | 118     | 98      | 647     | 631     | 12      |
| 101     | 100     | 19      | 65      | 26      | 75      | 22      | 86      | 19      |
| 0       | 0       | 0       | 0       | 0       | 0       | 0       | 0       | 0       |
| 0       | 5       | 0       | 48      | 0       | 0       | 10      | 0       | 0       |
| 14      | 120     | 567     | 71      | 25      | 0       | 189     | 112     | 0       |
| 32      | 17      | 81      | 78      | 9       | 78      | 38      | 43      | 44      |
| 56      | 181     | 182     | 65      | 86      | 245     | 30      | 198     | 69      |

|      |      |      |      |      |      |      |      |     |
|------|------|------|------|------|------|------|------|-----|
| 7161 | 4290 | 0    | 0    | 6400 | 15   | 1530 | 1491 | 818 |
| 80   | 256  | 226  | 491  | 218  | 325  | 498  | 100  | 87  |
| 20   | 16   | 4    | 0    | 8    | 4    | 35   | 34   | 0   |
| 284  | 307  | 2    | 6    | 361  | 877  | 55   | 247  | 97  |
| 197  | 153  | 134  | 170  | 183  | 123  | 503  | 276  | 175 |
| 163  | 83   | 131  | 121  | 231  | 59   | 119  | 107  | 77  |
| 5    | 60   | 292  | 43   | 9    | 0    | 69   | 61   | 0   |
| 13   | 73   | 36   | 40   | 14   | 40   | 473  | 308  | 259 |
| 200  | 295  | 133  | 77   | 218  | 63   | 256  | 300  | 91  |
| 64   | 135  | 280  | 265  | 151  | 518  | 127  | 257  | 144 |
| 191  | 0    | 2    | 14   | 21   | 9    | 53   | 27   | 23  |
| 87   | 134  | 171  | 94   | 333  | 382  | 469  | 331  | 125 |
| 101  | 242  | 24   | 10   | 8    | 11   | 102  | 53   | 0   |
| 10   | 2    | 11   | 33   | 0    | 22   | 0    | 3    | 6   |
| 66   | 10   | 54   | 3    | 37   | 39   | 95   | 69   | 54  |
| 0    | 117  | 258  | 260  | 621  | 489  | 290  | 285  | 7   |
| 3    | 5    | 2    | 0    | 2    | 326  | 239  | 31   | 3   |
| 102  | 0    | 67   | 110  | 22   | 60   | 20   | 24   | 442 |
| 182  | 130  | 233  | 329  | 270  | 339  | 119  | 91   | 36  |
| 12   | 100  | 61   | 26   | 10   | 82   | 194  | 109  | 34  |
| 5    | 2    | 0    | 228  | 0    | 7    | 0    | 2    | 48  |
| 69   | 82   | 2    | 0    | 73   | 206  | 14   | 60   | 9   |
| 366  | 61   | 18   | 27   | 76   | 49   | 128  | 209  | 84  |
| 112  | 36   | 21   | 41   | 34   | 8    | 26   | 46   | 50  |
| 69   | 13   | 73   | 37   | 44   | 48   | 28   | 51   | 135 |
| 112  | 112  | 212  | 220  | 50   | 203  | 153  | 161  | 103 |
| 129  | 78   | 90   | 58   | 81   | 45   | 175  | 95   | 75  |
| 94   | 190  | 4110 | 5859 | 258  | 154  | 59   | 322  | 33  |
| 33   | 174  | 261  | 175  | 176  | 177  | 290  | 220  | 143 |
| 24   | 89   | 52   | 64   | 38   | 191  | 80   | 223  | 97  |
| 221  | 109  | 82   | 58   | 59   | 207  | 7    | 327  | 283 |
| 136  | 61   | 147  | 82   | 131  | 94   | 131  | 144  | 37  |
| 22   | 11   | 6    | 4    | 37   | 2    | 14   | 69   | 4   |
| 44   | 35   | 37   | 72   | 114  | 111  | 42   | 38   | 98  |
| 104  | 116  | 70   | 30   | 80   | 149  | 106  | 163  | 33  |
| 11   | 285  | 134  | 25   | 116  | 52   | 8    | 131  | 94  |
| 5    | 10   | 43   | 266  | 0    | 9    | 23   | 0    | 2   |
| 96   | 90   | 191  | 342  | 150  | 159  | 127  | 131  | 104 |
| 160  | 739  | 330  | 0    | 780  | 1994 | 1241 | 735  | 993 |
| 25   | 30   | 4    | 30   | 36   | 74   | 16   | 103  | 47  |
| 216  | 5    | 0    | 4    | 3    | 14   | 17   | 30   | 4   |
| 32   | 91   | 297  | 224  | 197  | 184  | 102  | 67   | 16  |
| 495  | 220  | 437  | 271  | 305  | 489  | 443  | 338  | 220 |
| 24   | 41   | 61   | 67   | 36   | 17   | 100  | 63   | 36  |
| 246  | 98   | 157  | 227  | 32   | 76   | 48   | 111  | 88  |
| 37   | 92   | 125  | 152  | 111  | 158  | 253  | 142  | 110 |
| 67   | 155  | 22   | 48   | 166  | 43   | 242  | 239  | 72  |
| 0    | 0    | 334  | 346  | 44   | 71   | 0    | 0    | 0   |
| 50   | 65   | 148  | 86   | 85   | 153  | 52   | 115  | 212 |
| 261  | 1284 | 1206 | 1107 | 975  | 1450 | 2579 | 1866 | 880 |

|              |              |              |              |              |              |              |              |              |
|--------------|--------------|--------------|--------------|--------------|--------------|--------------|--------------|--------------|
| 43           | 62           | 0            | 0            | 10           | 0            | 83           | 60           | 11           |
| 90           | 68           | 70           | 166          | 2            | 13           | 79           | 16           | 9            |
| 0            | 6            | 73           | 139          | 45           | 18           | 2            | 64           | 2            |
| 12           | 115          | 121          | 29           | 6            | 53           | 121          | 195          | 91           |
| 174          | 170          | 176          | 182          | 205          | 216          | 267          | 161          | 66           |
| 144          | 162          | 108          | 185          | 109          | 226          | 71           | 132          | 10           |
| 51           | 4            | 3            | 0            | 0            | 0            | 53           | 41           | 34           |
| 130          | 400          | 7            | 240          | 212          | 385          | 402          | 584          | 361          |
| 13           | 22           | 196          | 86           | 33           | 94           | 47           | 51           | 71           |
| 81           | 78           | 12           | 24           | 76           | 40           | 177          | 78           | 39           |
| 74           | 129          | 34           | 0            | 41           | 368          | 130          | 260          | 357          |
| 98           | 145          | 64           | 7            | 13           | 0            | 17           | 81           | 143          |
| 14           | 43           | 139          | 73           | 102          | 186          | 122          | 82           | 63           |
| 35           | 38           | 48           | 16           | 25           | 61           | 158          | 36           | 8            |
| 27           | 146          | 138          | 175          | 52           | 161          | 53           | 52           | 100          |
| 51           | 150          | 120          | 73           | 9            | 41           | 146          | 264          | 32           |
| 85           | 50           | 96           | 54           | 38           | 83           | 31           | 61           | 47           |
| 97           | 45           | 45           | 36           | 78           | 30           | 109          | 54           | 77           |
| 25           | 65           | 114          | 86           | 100          | 162          | 197          | 117          | 71           |
| 25           | 10           | 23           | 25           | 71           | 8            | 7            | 16           | 5            |
| 103          | 27           | 96           | 129          | 18           | 157          | 46           | 36           | 48           |
| 0            | 519          | 755          | 528          | 129          | 1647         | 772          | 635          | 979          |
| 2            | 20           | 133          | 153          | 9            | 104          | 76           | 36           | 94           |
| 0            | 104          | 141          | 54           | 0            | 18           | 95           | 102          | 30           |
| 25           | 22           | 144          | 95           | 75           | 72           | 55           | 37           | 37           |
| 22           | 59           | 78           | 60           | 91           | 125          | 103          | 153          | 115          |
| 38           | 19           | 58           | 109          | 61           | 34           | 8            | 19           | 23           |
| 15           | 13           | 138          | 58           | 27           | 42           | 13           | 23           | 42           |
| 27           | 47           | 138          | 114          | 106          | 125          | 68           | 68           | 53           |
| 24           | 17           | 30           | 34           | 34           | 39           | 39           | 23           | 54           |
| 3            | 11           | 14           | 39           | 9            | 65           | 14           | 5            | 3            |
| 55           | 82           | 100          | 71           | 54           | 51           | 83           | 47           | 38           |
| <b>21873</b> | <b>20668</b> | <b>21182</b> | <b>21540</b> | <b>21477</b> | <b>22317</b> | <b>23391</b> | <b>23710</b> | <b>16416</b> |

| SPF.536 | SPF.537 | SPF.539 | SPF.546 | SPF.547 | taxonomy                                         |
|---------|---------|---------|---------|---------|--------------------------------------------------|
| 1500    | 48      | 666     | 114     | 252     | Bacteria;Firmicutes;Clostridia;Clostridiales;Lac |
| 810     | 1388    | 513     | 1524    | 704     | Bacteria;Bacteroidetes;Bacteroidia;Bacteroidæ    |
| 38      | 71      | 32      | 60      | 32      | Bacteria;Proteobacteria;Deltaproteobacteria;;    |
| 10      | 44      | 34      | 60      | 8       | Bacteria;Firmicutes;Clostridia;Clostridiales;Ru  |
| 71      | 36      | 42      | 89      | 33      | Bacteria;Firmicutes;Clostridia;Clostridiales;Ru  |
| 46      | 121     | 91      | 125     | 58      | Bacteria;Firmicutes;Clostridia;Clostridiales;Ru  |
| 47      | 74      | 82      | 45      | 23      | Bacteria;Bacteroidetes;Bacteroidia;Bacteroidæ    |
| 48      | 29      | 116     | 37      | 27      | Bacteria;Bacteroidetes;Bacteroidia;Bacteroidæ    |
| 17      | 14      | 38      | 18      | 7       | Bacteria;Bacteroidetes;Bacteroidia;Bacteroidæ    |
| 6       | 32      | 19      | 96      | 29      | Bacteria;Firmicutes;Clostridia;Clostridiales;Lac |
| 184     | 51      | 732     | 426     | 241     | Bacteria;Firmicutes;Clostridia;Clostridiales;Lac |
| 6       | 11      | 28      | 34      | 11      | Bacteria;Bacteroidetes;Bacteroidia;Bacteroidæ    |
| 113     | 29      | 16      | 41      | 25      | Bacteria;Firmicutes;Clostridia;Clostridiales;Lac |
| 0       | 5       | 0       | 5       | 0       | Bacteria;Firmicutes;Clostridia;Clostridiales;Lac |
| 5       | 18      | 49      | 19      | 21      | Bacteria;Firmicutes;Clostridia;Clostridiales;Lac |
| 494     | 90      | 212     | 347     | 404     | Bacteria;Firmicutes;Clostridia;Clostridiales;Lac |
| 74      | 18      | 51      | 54      | 29      | Bacteria;Firmicutes;Clostridia;Clostridiales;Lac |
| 23      | 57      | 58      | 107     | 24      | Bacteria;Bacteroidetes;Bacteroidia;Bacteroidæ    |
| 30      | 15      | 31      | 46      | 27      | Bacteria;Firmicutes;Clostridia;Clostridiales;Lac |
| 0       | 13      | 30      | 38      | 95      | Bacteria;Firmicutes;Clostridia;Clostridiales;Lac |
| 38      | 103     | 86      | 56      | 27      | Bacteria;Firmicutes;Clostridia;Clostridiales;Lac |
| 17      | 35      | 45      | 8       | 0       | Bacteria;Firmicutes;Bacilli;Lactobacillales;Lact |
| 17      | 70      | 35      | 56      | 30      | Bacteria;Firmicutes;Clostridia;Clostridiales;Ru  |
| 0       | 663     | 432     | 10      | 80      | Bacteria;Firmicutes;Clostridia;Clostridiales;Lac |
| 27      | 35      | 31      | 43      | 7       | Bacteria;Bacteroidetes;Bacteroidia;Bacteroidæ    |
| 7       | 7       | 34      | 2       | 11      | Bacteria;Bacteroidetes;Bacteroidia;Bacteroidæ    |
| 49      | 37      | 85      | 62      | 38      | Bacteria;Firmicutes;Clostridia;Clostridiales;Ru  |
| 4       | 610     | 1432    | 593     | 224     | Bacteria;Firmicutes;Clostridia;Clostridiales;Lac |
| 21      | 39      | 27      | 3       | 5       | Bacteria;Firmicutes;Clostridia;Clostridiales;Lac |
| 106     | 66      | 69      | 76      | 43      | Bacteria;Firmicutes;Clostridia;Clostridiales;Ru  |
| 168     | 37      | 76      | 182     | 14      | Bacteria;Firmicutes;Clostridia;Clostridiales;;;  |
| 31      | 105     | 41      | 56      | 36      | Bacteria;Firmicutes;Clostridia;Clostridiales;Lac |
| 58      | 512     | 323     | 354     | 146     | Bacteria;Firmicutes;Clostridia;Clostridiales;Lac |
| 1595    | 1813    | 473     | 350     | 625     | Bacteria;Firmicutes;Clostridia;Clostridiales;Lac |
| 31      | 181     | 179     | 280     | 60      | Bacteria;Firmicutes;Clostridia;Clostridiales;Ru  |
| 61      | 478     | 16      | 105     | 270     | Bacteria;Firmicutes;Bacilli;Lactobacillales;Lact |
| 106     | 124     | 135     | 412     | 150     | Bacteria;Firmicutes;Clostridia;Clostridiales;Lac |
| 146     | 228     | 104     | 205     | 118     | Bacteria;Firmicutes;Clostridia;Clostridiales;Lac |
| 260     | 281     | 393     | 240     | 34      | Bacteria;Firmicutes;Clostridia;Clostridiales;Ru  |
| 182     | 194     | 119     | 261     | 67      | Bacteria;Firmicutes;Clostridia;Clostridiales;Lac |
| 45      | 108     | 50      | 72      | 89      | Bacteria;Firmicutes;Clostridia;Clostridiales;Lac |
| 2       | 95      | 64      | 73      | 63      | Bacteria;Firmicutes;Clostridia;Clostridiales;Lac |
| 44      | 62      | 41      | 39      | 9       | Bacteria;Firmicutes;Clostridia;Clostridiales;Lac |
| 26      | 26      | 19      | 23      | 11      | Bacteria;Firmicutes;Clostridia;Clostridiales;Lac |
| 0       | 97      | 0       | 0       | 0       | Bacteria;Firmicutes;Clostridia;Clostridiales;Lac |
| 0       | 249     | 0       | 2       | 0       | Bacteria;Firmicutes;Clostridia;Clostridiales;Lac |
| 2       | 137     | 6       | 26      | 0       | Bacteria;Firmicutes;Clostridia;Clostridiales;Lac |
| 38      | 69      | 53      | 50      | 13      | Bacteria;Firmicutes;Clostridia;Clostridiales;Ru  |
| 78      | 157     | 36      | 91      | 20      | Bacteria;Firmicutes;Clostridia;Clostridiales;Lac |

|      |      |      |      |      |                                                  |
|------|------|------|------|------|--------------------------------------------------|
| 4986 | 0    | 1392 | 855  | 1686 | Bacteria;Firmicutes;Clostridia;Clostridiales;Lac |
| 267  | 215  | 366  | 348  | 167  | Bacteria;Firmicutes;Clostridia;Clostridiales;;;  |
| 14   | 13   | 20   | 21   | 12   | Bacteria;Firmicutes;Clostridia;Clostridiales;Lac |
| 227  | 221  | 7    | 205  | 15   | Bacteria;Firmicutes;Clostridia;Clostridiales;Lac |
| 66   | 74   | 36   | 145  | 66   | Bacteria;Firmicutes;Clostridia;Clostridiales;Lac |
| 108  | 77   | 70   | 103  | 122  | Bacteria;Bacteroidetes;Bacteroidia;Bacteroidæ    |
| 0    | 48   | 0    | 14   | 2    | Bacteria;Firmicutes;Clostridia;Clostridiales;Lac |
| 25   | 178  | 148  | 217  | 116  | Bacteria;Bacteroidetes;Bacteroidia;Bacteroidæ    |
| 223  | 179  | 146  | 124  | 64   | Bacteria;Firmicutes;Clostridia;Clostridiales;Ru  |
| 165  | 497  | 147  | 231  | 50   | Bacteria;Firmicutes;Clostridia;Clostridiales;Ru  |
| 11   | 0    | 77   | 22   | 57   | Bacteria;Firmicutes;Clostridia;Clostridiales;Ru  |
| 193  | 45   | 164  | 48   | 36   | Bacteria;Bacteroidetes;Bacteroidia;Bacteroidæ    |
| 2    | 272  | 9    | 106  | 16   | Bacteria;Firmicutes;Clostridia;Clostridiales;Lac |
| 0    | 2    | 3    | 4    | 16   | Bacteria;Firmicutes;Clostridia;Clostridiales;Lac |
| 18   | 99   | 45   | 46   | 31   | Bacteria;Firmicutes;Clostridia;Clostridiales;Lac |
| 118  | 4    | 0    | 4    | 0    | Bacteria;Bacteroidetes;Bacteroidia;Bacteroidæ    |
| 0    | 233  | 20   | 796  | 344  | Bacteria;Firmicutes;Clostridia;Clostridiales;Lac |
| 31   | 36   | 99   | 36   | 10   | Bacteria;Firmicutes;Bacilli;Lactobacillales;Lact |
| 25   | 144  | 205  | 139  | 51   | Bacteria;Firmicutes;Clostridia;Clostridiales;Lac |
| 4    | 54   | 36   | 44   | 8    | Bacteria;Firmicutes;Clostridia;Clostridiales;Lac |
| 13   | 21   | 8    | 25   | 29   | Bacteria;Firmicutes;Clostridia;Clostridiales;Lac |
| 49   | 68   | 0    | 38   | 8    | Bacteria;Firmicutes;Clostridia;Clostridiales;Lac |
| 90   | 150  | 78   | 182  | 27   | Bacteria;Firmicutes;Clostridia;Clostridiales;Lac |
| 72   | 201  | 236  | 105  | 19   | Bacteria;Firmicutes;Clostridia;Clostridiales;Lac |
| 205  | 333  | 145  | 281  | 86   | Bacteria;Firmicutes;Clostridia;Clostridiales;Ru  |
| 134  | 188  | 296  | 174  | 74   | Bacteria;Firmicutes;Clostridia;Clostridiales;Ru  |
| 75   | 58   | 139  | 42   | 22   | Bacteria;Bacteroidetes;Bacteroidia;Bacteroidæ    |
| 154  | 30   | 14   | 138  | 69   | Bacteria;Firmicutes;Clostridia;Clostridiales;Lac |
| 159  | 279  | 141  | 248  | 91   | Bacteria;Bacteroidetes;Bacteroidia;Bacteroidæ    |
| 13   | 32   | 17   | 58   | 30   | Bacteria;Firmicutes;Clostridia;Clostridiales;Lac |
| 126  | 67   | 22   | 124  | 26   | Bacteria;Firmicutes;Clostridia;Clostridiales;Lac |
| 47   | 76   | 88   | 69   | 38   | Bacteria;Firmicutes;Clostridia;Clostridiales;Lac |
| 0    | 12   | 28   | 4    | 0    | Bacteria;Firmicutes;Clostridia;Clostridiales;Ru  |
| 32   | 91   | 216  | 135  | 37   | Bacteria;Firmicutes;Clostridia;Clostridiales;Ru  |
| 42   | 73   | 106  | 56   | 83   | Bacteria;Firmicutes;Clostridia;Clostridiales;Lac |
| 38   | 117  | 29   | 136  | 28   | Bacteria;Firmicutes;Clostridia;Clostridiales;;;  |
| 7    | 300  | 61   | 29   | 5    | Bacteria;Tenericutes;Mollicutes;Anaeroplasm      |
| 70   | 264  | 122  | 226  | 117  | Bacteria;Firmicutes;Clostridia;Clostridiales;Ru  |
| 0    | 1656 | 273  | 1618 | 599  | Bacteria;Firmicutes;Clostridia;Clostridiales;Lac |
| 42   | 193  | 111  | 219  | 20   | Bacteria;Firmicutes;Clostridia;Clostridiales;Lac |
| 48   | 7    | 0    | 3    | 9    | Bacteria;Firmicutes;Clostridia;Clostridiales;Lac |
| 41   | 26   | 32   | 16   | 21   | Bacteria;Proteobacteria;Betaproteobacteria;B     |
| 281  | 488  | 340  | 457  | 196  | Bacteria;Firmicutes;Clostridia;Clostridiales;Ru  |
| 28   | 52   | 77   | 92   | 131  | Bacteria;Bacteroidetes;Bacteroidia;Bacteroidæ    |
| 60   | 165  | 139  | 77   | 0    | Bacteria;Firmicutes;Clostridia;Clostridiales;Ru  |
| 49   | 71   | 60   | 87   | 16   | Bacteria;Bacteroidetes;Bacteroidia;Bacteroidæ    |
| 81   | 35   | 73   | 158  | 128  | Bacteria;Firmicutes;Clostridia;Clostridiales;Lac |
| 0    | 0    | 0    | 0    | 0    | Bacteria;Firmicutes;Clostridia;Clostridiales;;;  |
| 32   | 141  | 55   | 143  | 37   | Bacteria;Proteobacteria;Deltaproteobacteria;I    |
| 139  | 54   | 588  | 602  | 81   | Bacteria;Bacteroidetes;Bacteroidia;Bacteroidæ    |



|              |              |              |              |                                                      |
|--------------|--------------|--------------|--------------|------------------------------------------------------|
| 3            | 5            | 2            | 6            | 2 Bacteria;Firmicutes;Clostridia;Clostridiales;Lac   |
| 217          | 64           | 66           | 78           | 17 Bacteria;Firmicutes;Clostridia;Clostridiales;Ru   |
| 0            | 2            | 0            | 15           | 2 Bacteria;Firmicutes;Clostridia;Clostridiales;Lac   |
| 24           | 37           | 44           | 125          | 79 Bacteria;Firmicutes;Clostridia;Clostridiales;Lac  |
| 35           | 89           | 102          | 117          | 59 Bacteria;Firmicutes;Clostridia;Clostridiales;Lac  |
| 88           | 208          | 121          | 101          | 39 Bacteria;Firmicutes;Clostridia;Clostridiales;Lac  |
| 8            | 52           | 28           | 35           | 18 Bacteria;Firmicutes;Clostridia;Clostridiales;Lac  |
| 140          | 227          | 91           | 153          | 56 Bacteria;Firmicutes;Clostridia;Clostridiales;Lac  |
| 56           | 82           | 33           | 56           | 23 Bacteria;Firmicutes;Clostridia;Clostridiales;Ru   |
| 87           | 155          | 95           | 61           | 47 Bacteria;Bacteroidetes;Bacteroidia;Bacteroidæ     |
| 149          | 330          | 570          | 262          | 408 Bacteria;Firmicutes;Clostridia;Clostridiales;Lac |
| 45           | 163          | 176          | 192          | 42 Bacteria;Firmicutes;Clostridia;Clostridiales;Ru   |
| 22           | 20           | 23           | 32           | 2 Bacteria;Bacteroidetes;Bacteroidia;Bacteroidæ      |
| 39           | 49           | 62           | 39           | 11 Bacteria;Deferribacteres;Deferribacteres;Defe     |
| 56           | 72           | 88           | 41           | 33 Bacteria;Firmicutes;Clostridia;Clostridiales;Ru   |
| 10           | 97           | 108          | 104          | 113 Bacteria;Firmicutes;Clostridia;Clostridiales;Lac |
| 57           | 120          | 129          | 81           | 32 Bacteria;Firmicutes;Clostridia;Clostridiales;Lac  |
| 75           | 102          | 123          | 159          | 50 Bacteria;Bacteroidetes;Bacteroidia;Bacteroidæ     |
| 33           | 99           | 98           | 40           | 58 Bacteria;Bacteroidetes;Bacteroidia;Bacteroidæ     |
| 19           | 6            | 5            | 0            | 0 Bacteria;Firmicutes;Clostridia;Clostridiales;Lac   |
| 42           | 40           | 29           | 35           | 42 Bacteria;Firmicutes;Clostridia;Clostridiales;Lac  |
| 0            | 629          | 303          | 468          | 278 Bacteria;Firmicutes;Clostridia;Clostridiales;Lac |
| 12           | 96           | 58           | 135          | 37 Bacteria;Bacteroidetes;Bacteroidia;Bacteroidæ     |
| 0            | 100          | 44           | 19           | 0 Bacteria;Firmicutes;Clostridia;Clostridiales;Lac   |
| 25           | 39           | 29           | 63           | 16 Bacteria;Firmicutes;Clostridia;Clostridiales;;;   |
| 50           | 127          | 85           | 91           | 19 Bacteria;Bacteroidetes;Bacteroidia;Bacteroidæ     |
| 43           | 21           | 72           | 80           | 60 Bacteria;Firmicutes;Clostridia;Clostridiales;Lac  |
| 24           | 11           | 38           | 10           | 8 Bacteria;Bacteroidetes;Bacteroidia;Bacteroidæ      |
| 28           | 109          | 56           | 109          | 35 Bacteria;Firmicutes;Clostridia;Clostridiales;Ru   |
| 35           | 89           | 52           | 122          | 19 Bacteria;Bacteroidetes;Bacteroidia;Bacteroidæ     |
| 9            | 16           | 4            | 8            | 0 Bacteria;Firmicutes;Clostridia;Clostridiales;Lac   |
| 50           | 59           | 40           | 63           | 35 Bacteria;Firmicutes;Clostridia;Clostridiales;Ru   |
| <b>16772</b> | <b>19736</b> | <b>16502</b> | <b>18965</b> | <b>10776</b>                                         |

chnospiraceae;Hungatella group;  
ales;Rikenellaceae;Alistipes;  
;;  
minococcaceae;;  
minococcaceae;;  
minococcaceae;;  
ales;Porphyromonadaceae;;  
ales;Prevotellaceae;Prevotella sp.;  
ales;Porphyromonadaceae;;  
chnospiraceae;;  
chnospiraceae;Hungatella group;  
ales;Porphyromonadaceae;;  
chnospiraceae;Hungatella group;  
chnospiraceae;;  
chnospiraceae;Eubacterium sp.;  
chnospiraceae;;  
chnospiraceae;;  
ales;Rikenellaceae;Alistipes;  
chnospiraceae;Hungatella group;  
chnospiraceae;Ruminococcus;  
chnospiraceae;Clostridium;  
obacillaceae;Lactobacillus;  
minococcaceae;Clostridium;  
chnospiraceae;Hungatella group;  
ales;Porphyromonadaceae;Parabacteroides;  
ales;Porphyromonadaceae;;  
minococcaceae;;  
chnospiraceae;Eubacterium;  
chnospiraceae;;  
minococcaceae;;

chnospiraceae;;  
chnospiraceae;;  
chnospiraceae;Clostridium;  
minococcaceae;Flavonifractor;  
obacillaceae;Lactobacillus;  
chnospiraceae;Roseburia;  
chnospiraceae;Clostridium;  
minococcaceae;;  
chnospiraceae;Moryella;  
chnospiraceae;;  
chnospiraceae;Hungatella group;  
chnospiraceae;;  
chnospiraceae;Roseburia;  
chnospiraceae;Hungatella group;  
chnospiraceae;Hungatella group;  
chnospiraceae;;  
minococcaceae;;  
chnospiraceae;;

chnospiraceae;Hungatella group;

chnospiraceae;;

chnospiraceae;;

chnospiraceae;Hungatella group;

ales;Porphyromonadaceae;Barnesiella;

chnospiraceae;;

ales;Porphyromonadaceae;;

minococcaceae;Flavonifractor;

minococcaceae;Butyricoccus;

minococcaceae;Butyricoccus;

ales;Porphyromonadaceae;;

chnospiraceae;Hungatella group;

chnospiraceae;;

chnospiraceae;;

ales;;;

chnospiraceae;Hungatella group;

obacillaceae;Lactobacillus;

chnospiraceae;ClostridiumXIVb;

chnospiraceae;Ruminococcus;

chnospiraceae;Hungatella group;

chnospiraceae;;

chnospiraceae;Hungatella group;

chnospiraceae;;

minococcaceae;;

minococcaceae;;

ales;Porphyromonadaceae;;

chnospiraceae;;

ales;Porphyromonadaceae;Odoribacter;

chnospiraceae;;

chnospiraceae;Clostridium;

chnospiraceae;;

minococcaceae;;

minococcaceae;Oscillibacter;

chnospiraceae;;

atales;Anaeroplasmataceae;Anaeroplasma;

minococcaceae;Oscillibacter;

chnospiraceae;Hungatella group;

chnospiraceae;;

chnospiraceae;Clostridium;

urkholderiales;Sutterellaceae;Parasutterella;

minococcaceae;Pseudoflavonifractor group;

ales;Rikenellaceae;Alistipes;

minococcaceae;Anaerotruncus;

ales;Porphyromonadaceae;;

chnospiraceae;;

Desulfovibrionales;;;

ales;Porphyromonadaceae;Barnesiella;

chnospiraceae;;  
minococcaceae;;  
chnospiraceae;;  
chnospiraceae;;  
chnospiraceae;;  
chnospiraceae;;  
chnospiraceae;;  
chnospiraceae;Anaerostipes;  
minococcaceae;ClostridiumIV;  
ales;Bacteroidaceae;Bacteroides;  
chnospiraceae;Roseburia;  
minococcaceae;;  
ales;Porphyromonadaceae;;  
erribacterales;Deferribacteraceae;Mucispirillum;  
minococcaceae;Ruminococcus;  
chnospiraceae;Hungatella group;  
chnospiraceae;;  
ales;Rikenellaceae;Alistipes;  
ales;Porphyromonadaceae;;  
chnospiraceae;Anaerospobacter;  
chnospiraceae;Anaerospobacter;  
chnospiraceae;Clostridium;  
ales;Porphyromonadaceae;Odoribacter;  
chnospiraceae;;

ales;Porphyromonadaceae;;  
chnospiraceae;Eisenbergiella;  
ales;Prevotellaceae;;  
minococcaceae;ClostridiumIV;  
ales;Porphyromonadaceae;Odoribacter;  
chnospiraceae;Hungatella group;  
minococcaceae;Oscillibacter;

| #OTUId   | 79.R.are.f | B23.R.are.f | H38.NR.WT | H40.NR.are | B17.R.WT.f | B21.R.are.f | SPF.505 | H35.NR.WT |
|----------|------------|-------------|-----------|------------|------------|-------------|---------|-----------|
| OTU_1    | 2          | 28          | 576       | 32         | 263        | 2825        | 10      | 3190      |
| OTU_10   | 8          | 1022        | 1164      | 539        | 265        | 1746        | 736     | 401       |
| OTU_100  | 1          | 0           | 0         | 0          | 0          | 0           | 37      | 0         |
| OTU_101  | 45         | 132         | 0         | 265        | 92         | 101         | 86      | 176       |
| OTU_103  | 70         | 135         | 160       | 136        | 271        | 232         | 254     | 248       |
| OTU_1035 | 324        | 244         | 1061      | 1427       | 234        | 96          | 54      | 160       |
| OTU_104  | 167        | 239         | 303       | 214        | 148        | 213         | 117     | 287       |
| OTU_105  | 0          | 0           | 1         | 1          | 3          | 0           | 4       | 0         |
| OTU_106  | 105        | 106         | 14        | 199        | 110        | 116         | 48      | 186       |
| OTU_107  | 82         | 180         | 72        | 41         | 177        | 122         | 86      | 60        |
| OTU_1072 | 1          | 13          | 0         | 3          | 27         | 232         | 26      | 0         |
| OTU_1086 | 43         | 23          | 8         | 13         | 52         | 60          | 12      | 28        |
| OTU_109  | 204        | 381         | 916       | 250        | 348        | 145         | 28      | 194       |
| OTU_11   | 361        | 269         | 0         | 2          | 3          | 1           | 1524    | 0         |
| OTU_111  | 192        | 328         | 7         | 249        | 140        | 110         | 7       | 268       |
| OTU_112  | 14         | 17          | 65        | 2          | 0          | 225         | 0       | 10        |
| OTU_113  | 185        | 153         | 1         | 210        | 138        | 219         | 13      | 98        |
| OTU_1132 | 33         | 113         | 111       | 144        | 288        | 206         | 149     | 56        |
| OTU_1148 | 46         | 103         | 124       | 124        | 24         | 17          | 473     | 33        |
| OTU_1175 | 62         | 96          | 71        | 52         | 13         | 118         | 68      | 33        |
| OTU_1176 | 0          | 5           | 53        | 0          | 5          | 13          | 3       | 64        |
| OTU_118  | 118        | 124         | 4         | 71         | 0          | 0           | 18      | 99        |
| OTU_1184 | 0          | 1071        | 3         | 9          | 153        | 2           | 1274    | 0         |
| OTU_12   | 329        | 911         | 1645      | 1135       | 11         | 980         | 55      | 2         |
| OTU_120  | 270        | 391         | 192       | 197        | 711        | 173         | 634     | 178       |
| OTU_121  | 26         | 113         | 14        | 45         | 196        | 5           | 111     | 53        |
| OTU_1217 | 4          | 934         | 1         | 10         | 115        | 1           | 752     | 5         |
| OTU_1260 | 177        | 94          | 131       | 163        | 206        | 119         | 126     | 106       |
| OTU_13   | 866        | 688         | 698       | 1301       | 641        | 197         | 231     | 240       |
| OTU_130  | 111        | 28          | 64        | 138        | 57         | 35          | 211     | 29        |
| OTU_1316 | 0          | 0           | 72        | 2          | 30         | 385         | 0       | 414       |
| OTU_1318 | 0          | 0           | 0         | 39         | 0          | 0           | 0       | 118       |
| OTU_1334 | 473        | 6           | 0         | 32         | 12         | 5           | 7       | 46        |
| OTU_1335 | 46         | 5           | 61        | 3          | 0          | 315         | 39      | 232       |
| OTU_1380 | 2553       | 3571        | 42        | 89         | 3555       | 3112        | 1270    | 37        |
| OTU_1387 | 164        | 181         | 108       | 64         | 174        | 47          | 332     | 162       |
| OTU_14   | 1450       | 833         | 1358      | 1457       | 5          | 3           | 44      | 766       |
| OTU_140  | 1          | 85          | 36        | 8          | 308        | 5           | 9       | 13        |
| OTU_1431 | 40         | 111         | 60        | 4          | 144        | 58          | 235     | 50        |
| OTU_1441 | 184        | 137         | 315       | 154        | 254        | 109         | 184     | 77        |
| OTU_146  | 181        | 131         | 3         | 1          | 170        | 160         | 43      | 1         |
| OTU_15   | 0          | 9           | 0         | 0          | 1          | 0           | 1354    | 0         |
| OTU_16   | 374        | 128         | 195       | 157        | 1010       | 177         | 450     | 51        |
| OTU_17   | 952        | 914         | 3         | 186        | 970        | 862         | 200     | 1         |
| OTU_18   | 1656       | 553         | 469       | 687        | 443        | 0           | 396     | 10        |
| OTU_19   | 132        | 593         | 527       | 393        | 278        | 177         | 395     | 56        |
| OTU_2    | 23         | 1           | 3472      | 5552       | 8          | 2           | 351     | 2768      |
| OTU_20   | 763        | 344         | 1         | 20         | 485        | 61          | 54      | 94        |
| OTU_21   | 69         | 18          | 177       | 4          | 13         | 635         | 0       | 22        |
| OTU_22   | 7          | 2           | 1426      | 1057       | 5          | 1           | 33      | 375       |

|         |      |      |      |      |      |      |     |      |
|---------|------|------|------|------|------|------|-----|------|
| OTU_226 | 0    | 0    | 1    | 82   | 1    | 0    | 0   | 193  |
| OTU_227 | 146  | 126  | 35   | 75   | 441  | 381  | 416 | 198  |
| OTU_23  | 31   | 279  | 40   | 4    | 670  | 611  | 0   | 4    |
| OTU_24  | 1    | 1    | 1    | 1    | 1    | 0    | 3   | 505  |
| OTU_25  | 457  | 399  | 2    | 193  | 1292 | 377  | 18  | 158  |
| OTU_26  | 342  | 291  | 502  | 369  | 455  | 223  | 184 | 211  |
| OTU_260 | 410  | 117  | 389  | 74   | 175  | 339  | 73  | 193  |
| OTU_27  | 255  | 110  | 1519 | 1633 | 95   | 405  | 6   | 440  |
| OTU_277 | 1    | 2    | 0    | 2    | 406  | 516  | 0   | 4    |
| OTU_28  | 485  | 48   | 0    | 1    | 6    | 3    | 220 | 467  |
| OTU_280 | 63   | 296  | 123  | 111  | 177  | 35   | 112 | 42   |
| OTU_284 | 1    | 148  | 2    | 0    | 21   | 1    | 76  | 0    |
| OTU_29  | 3    | 0    | 420  | 611  | 18   | 28   | 0   | 155  |
| OTU_293 | 87   | 96   | 103  | 110  | 237  | 133  | 61  | 83   |
| OTU_3   | 63   | 53   | 170  | 281  | 51   | 21   | 8   | 35   |
| OTU_30  | 100  | 43   | 32   | 26   | 64   | 357  | 118 | 43   |
| OTU_306 | 0    | 0    | 50   | 557  | 38   | 6    | 16  | 10   |
| OTU_308 | 600  | 89   | 0    | 0    | 5    | 0    | 25  | 0    |
| OTU_31  | 305  | 71   | 73   | 440  | 784  | 612  | 514 | 303  |
| OTU_32  | 252  | 221  | 85   | 1    | 466  | 538  | 62  | 1295 |
| OTU_33  | 29   | 128  | 28   | 157  | 56   | 5    | 36  | 448  |
| OTU_34  | 263  | 107  | 218  | 79   | 46   | 80   | 94  | 56   |
| OTU_349 | 0    | 0    | 0    | 4    | 39   | 278  | 0   | 0    |
| OTU_35  | 57   | 85   | 388  | 171  | 3    | 89   | 183 | 394  |
| OTU_359 | 46   | 73   | 13   | 8    | 226  | 642  | 210 | 61   |
| OTU_36  | 110  | 171  | 91   | 21   | 178  | 62   | 504 | 269  |
| OTU_361 | 3    | 0    | 65   | 0    | 478  | 23   | 20  | 1    |
| OTU_37  | 907  | 42   | 690  | 60   | 629  | 187  | 1   | 74   |
| OTU_38  | 348  | 223  | 20   | 263  | 363  | 716  | 18  | 724  |
| OTU_39  | 4    | 51   | 3    | 1    | 118  | 34   | 593 | 4    |
| OTU_395 | 90   | 128  | 221  | 115  | 98   | 124  | 147 | 41   |
| OTU_4   | 2062 | 1124 | 146  | 2686 | 2085 | 1548 | 229 | 2306 |
| OTU_40  | 281  | 384  | 330  | 203  | 993  | 119  | 263 | 320  |
| OTU_41  | 83   | 405  | 191  | 85   | 688  | 187  | 107 | 34   |
| OTU_419 | 90   | 220  | 170  | 74   | 169  | 138  | 188 | 153  |
| OTU_42  | 240  | 286  | 234  | 15   | 341  | 71   | 396 | 63   |
| OTU_424 | 8    | 11   | 0    | 0    | 138  | 103  | 65  | 0    |
| OTU_43  | 677  | 57   | 111  | 375  | 258  | 9    | 9   | 193  |
| OTU_44  | 0    | 1    | 3    | 28   | 1    | 0    | 1   | 102  |
| OTU_45  | 61   | 0    | 123  | 482  | 12   | 0    | 0   | 57   |
| OTU_46  | 234  | 0    | 2    | 0    | 0    | 0    | 23  | 298  |
| OTU_47  | 155  | 449  | 548  | 202  | 389  | 273  | 499 | 105  |
| OTU_48  | 212  | 234  | 129  | 72   | 349  | 267  | 117 | 378  |
| OTU_485 | 1    | 0    | 0    | 0    | 128  | 143  | 0   | 0    |
| OTU_49  | 29   | 54   | 54   | 79   | 22   | 10   | 190 | 18   |
| OTU_50  | 187  | 147  | 640  | 291  | 155  | 217  | 31  | 523  |
| OTU_501 | 13   | 329  | 31   | 35   | 504  | 594  | 425 | 20   |
| OTU_51  | 455  | 110  | 83   | 248  | 56   | 30   | 172 | 204  |
| OTU_52  | 203  | 181  | 2    | 0    | 1    | 0    | 73  | 440  |
| OTU_53  | 330  | 82   | 190  | 446  | 58   | 136  | 349 | 14   |

|         |      |      |      |      |      |      |      |      |
|---------|------|------|------|------|------|------|------|------|
| OTU_54  | 108  | 80   | 125  | 182  | 109  | 27   | 344  | 358  |
| OTU_55  | 38   | 74   | 162  | 84   | 364  | 118  | 293  | 487  |
| OTU_556 | 1    | 154  | 0    | 0    | 17   | 0    | 36   | 0    |
| OTU_56  | 377  | 289  | 2    | 156  | 689  | 262  | 18   | 51   |
| OTU_57  | 2    | 0    | 14   | 605  | 2    | 0    | 41   | 109  |
| OTU_571 | 0    | 1    | 2    | 2    | 80   | 142  | 3    | 1    |
| OTU_58  | 253  | 298  | 274  | 353  | 419  | 36   | 504  | 614  |
| OTU_586 | 5    | 11   | 0    | 0    | 113  | 1    | 455  | 2    |
| OTU_59  | 0    | 0    | 17   | 7    | 0    | 0    | 12   | 11   |
| OTU_6   | 1642 | 288  | 4    | 1    | 23   | 5    | 865  | 1996 |
| OTU_60  | 70   | 28   | 0    | 101  | 354  | 80   | 97   | 73   |
| OTU_61  | 375  | 85   | 203  | 173  | 61   | 75   | 13   | 1    |
| OTU_62  | 141  | 214  | 6    | 271  | 159  | 351  | 7    | 141  |
| OTU_64  | 293  | 210  | 110  | 169  | 184  | 108  | 141  | 241  |
| OTU_65  | 24   | 49   | 102  | 92   | 19   | 14   | 19   | 97   |
| OTU_66  | 307  | 233  | 340  | 239  | 56   | 282  | 18   | 320  |
| OTU_668 | 0    | 50   | 46   | 304  | 0    | 2    | 5    | 37   |
| OTU_67  | 427  | 216  | 196  | 294  | 181  | 162  | 29   | 69   |
| OTU_68  | 93   | 171  | 293  | 158  | 13   | 85   | 200  | 80   |
| OTU_69  | 1    | 2    | 152  | 0    | 1211 | 59   | 38   | 1    |
| OTU_697 | 4    | 1    | 51   | 780  | 0    | 0    | 4    | 98   |
| OTU_7   | 15   | 5659 | 7    | 48   | 702  | 2    | 6659 | 2    |
| OTU_70  | 70   | 122  | 206  | 518  | 67   | 160  | 40   | 131  |
| OTU_703 | 71   | 25   | 119  | 401  | 31   | 137  | 84   | 30   |
| OTU_71  | 370  | 207  | 1    | 294  | 287  | 216  | 18   | 1    |
| OTU_711 | 1    | 0    | 54   | 12   | 1    | 1    | 4    | 23   |
| OTU_72  | 2    | 0    | 0    | 206  | 1    | 0    | 0    | 509  |
| OTU_73  | 72   | 27   | 22   | 5    | 106  | 48   | 149  | 168  |
| OTU_74  | 15   | 329  | 629  | 218  | 131  | 53   | 127  | 177  |
| OTU_743 | 4    | 128  | 98   | 4    | 15   | 36   | 42   | 132  |
| OTU_75  | 123  | 53   | 1    | 2    | 304  | 204  | 45   | 89   |
| OTU_76  | 353  | 55   | 5    | 110  | 55   | 0    | 296  | 45   |
| OTU_77  | 0    | 0    | 0    | 0    | 0    | 0    | 8    | 0    |
| OTU_774 | 14   | 13   | 20   | 10   | 31   | 1557 | 12   | 334  |
| OTU_78  | 102  | 37   | 64   | 107  | 13   | 19   | 193  | 173  |
| OTU_79  | 156  | 192  | 17   | 251  | 171  | 102  | 11   | 371  |
| OTU_799 | 537  | 318  | 41   | 670  | 505  | 401  | 53   | 676  |
| OTU_8   | 574  | 1198 | 2286 | 1691 | 2247 | 1717 | 1333 | 2055 |
| OTU_80  | 367  | 109  | 96   | 77   | 76   | 0    | 5    | 43   |
| OTU_81  | 31   | 161  | 4    | 57   | 161  | 1    | 190  | 2    |
| OTU_82  | 108  | 221  | 578  | 215  | 174  | 168  | 50   | 88   |
| OTU_83  | 227  | 128  | 279  | 17   | 238  | 0    | 64   | 133  |
| OTU_84  | 52   | 110  | 225  | 397  | 141  | 54   | 178  | 156  |
| OTU_85  | 0    | 0    | 0    | 0    | 0    | 0    | 25   | 0    |
| OTU_851 | 2    | 1    | 86   | 1    | 537  | 25   | 21   | 0    |
| OTU_86  | 138  | 111  | 0    | 0    | 66   | 46   | 1    | 10   |
| OTU_87  | 174  | 164  | 342  | 243  | 170  | 98   | 214  | 131  |
| OTU_88  | 21   | 108  | 4    | 3    | 197  | 159  | 268  | 54   |
| OTU_89  | 4    | 1    | 109  | 163  | 0    | 1    | 0    | 56   |
| OTU_9   | 607  | 42   | 1362 | 1209 | 0    | 1    | 43   | 1046 |

|                    |              |              |              |              |              |              |              |              |
|--------------------|--------------|--------------|--------------|--------------|--------------|--------------|--------------|--------------|
| OTU_90             | 15           | 42           | 0            | 0            | 109          | 9            | 29           | 30           |
| OTU_91             | 0            | 0            | 0            | 1            | 0            | 0            | 38           | 1            |
| OTU_92             | 16           | 112          | 0            | 418          | 102          | 223          | 59           | 0            |
| OTU_93             | 366          | 0            | 0            | 0            | 10           | 23           | 0            | 0            |
| OTU_930            | 136          | 158          | 15           | 183          | 95           | 79           | 12           | 289          |
| OTU_94             | 37           | 184          | 65           | 52           | 152          | 127          | 47           | 94           |
| OTU_946            | 263          | 0            | 0            | 48           | 100          | 18           | 35           | 2            |
| OTU_95             | 4            | 29           | 34           | 40           | 35           | 14           | 1            | 10           |
| OTU_96             | 15           | 29           | 151          | 122          | 307          | 152          | 3            | 78           |
| OTU_97             | 62           | 148          | 497          | 378          | 120          | 308          | 199          | 173          |
| OTU_974            | 1154         | 809          | 3324         | 4812         | 828          | 349          | 221          | 602          |
| OTU_98             | 52           | 82           | 44           | 17           | 128          | 73           | 384          | 44           |
| OTU_99             | 107          | 75           | 31           | 33           | 47           | 1            | 230          | 61           |
| OTU_997            | 25           | 159          | 80           | 12           | 180          | 208          | 279          | 25           |
| OTU_998            | 0            | 1            | 176          | 482          | 0            | 0            | 2            | 2            |
| <b>Read per s:</b> | <b>29952</b> | <b>28884</b> | <b>29634</b> | <b>38102</b> | <b>34501</b> | <b>24679</b> | <b>27019</b> | <b>28955</b> |



| SPF.497 | SPF.502 | 110.NR.are | SPF.494 | 78.R.WT.m | H37.NR.arc | H48.NR.W | B18.R.are.r | 109.NR.are |
|---------|---------|------------|---------|-----------|------------|----------|-------------|------------|
| 4       | 10      | 0          | 12      | 22        | 2          | 2        | 1           | 0          |
| 2009    | 1254    | 137        | 513     | 910       | 1          | 2158     | 0           | 589        |
| 162     | 123     | 0          | 189     | 0         | 3          | 0        | 0           | 0          |
| 83      | 55      | 61         | 110     | 126       | 84         | 0        | 31          | 111        |
| 155     | 242     | 229        | 129     | 106       | 47         | 178      | 515         | 403        |
| 71      | 31      | 337        | 2       | 62        | 426        | 1293     | 321         | 385        |
| 108     | 86      | 219        | 153     | 105       | 165        | 213      | 239         | 228        |
| 30      | 31      | 3          | 68      | 0         | 1          | 0        | 2           | 0          |
| 37      | 65      | 151        | 61      | 133       | 132        | 3        | 140         | 162        |
| 49      | 190     | 143        | 78      | 90        | 17         | 75       | 72          | 153        |
| 20      | 19      | 0          | 36      | 17        | 0          | 0        | 0           | 0          |
| 38      | 35      | 29         | 58      | 16        | 20         | 10       | 1           | 9          |
| 15      | 44      | 328        | 42      | 65        | 173        | 931      | 476         | 131        |
| 5       | 0       | 0          | 0       | 0         | 0          | 1        | 0           | 0          |
| 10      | 27      | 240        | 30      | 266       | 339        | 0        | 109         | 240        |
| 7       | 0       | 91         | 4       | 75        | 28         | 50       | 0           | 9          |
| 41      | 49      | 172        | 56      | 83        | 149        | 0        | 157         | 237        |
| 131     | 233     | 104        | 100     | 39        | 68         | 342      | 68          | 176        |
| 106     | 211     | 77         | 397     | 91        | 135        | 189      | 38          | 387        |
| 37      | 31      | 146        | 72      | 48        | 47         | 147      | 9           | 70         |
| 2       | 1       | 144        | 6       | 1         | 90         | 109      | 2           | 160        |
| 38      | 36      | 85         | 51      | 145       | 119        | 0        | 0           | 140        |
| 571     | 1012    | 0          | 1637    | 1767      | 0          | 0        | 0           | 1          |
| 128     | 315     | 1          | 2       | 19        | 0          | 1944     | 22          | 0          |
| 336     | 308     | 148        | 151     | 209       | 109        | 214      | 241         | 214        |
| 81      | 76      | 32         | 75      | 59        | 24         | 26       | 175         | 36         |
| 338     | 557     | 0          | 889     | 1537      | 0          | 3        | 0           | 1          |
| 134     | 129     | 90         | 91      | 33        | 125        | 105      | 25          | 195        |
| 820     | 418     | 702        | 630     | 113       | 635        | 1927     | 198         | 457        |
| 69      | 97      | 69         | 49      | 4         | 74         | 105      | 51          | 106        |
| 1       | 0       | 0          | 0       | 1         | 0          | 0        | 0           | 0          |
| 0       | 14      | 93         | 28      | 0         | 268        | 0        | 0           | 132        |
| 10      | 21      | 64         | 67      | 125       | 32         | 0        | 2           | 21         |
| 47      | 43      | 10         | 41      | 8         | 12         | 150      | 392         | 20         |
| 3236    | 915     | 26         | 11      | 1533      | 31         | 13       | 1897        | 45         |
| 218     | 180     | 185        | 177     | 90        | 143        | 54       | 91          | 123        |
| 150     | 104     | 1057       | 159     | 436       | 1656       | 1511     | 4           | 765        |
| 14      | 14      | 387        | 52      | 1         | 214        | 73       | 17          | 307        |
| 72      | 134     | 50         | 113     | 121       | 15         | 63       | 115         | 82         |
| 77      | 146     | 293        | 35      | 41        | 0          | 61       | 430         | 46         |
| 87      | 38      | 21         | 59      | 126       | 1          | 1        | 143         | 15         |
| 788     | 678     | 0          | 9       | 0         | 0          | 0        | 6           | 0          |
| 43      | 759     | 539        | 68      | 37        | 8          | 440      | 447         | 470        |
| 589     | 429     | 0          | 1       | 206       | 0          | 0        | 1116        | 0          |
| 465     | 968     | 0          | 56      | 2         | 0          | 670      | 526         | 0          |
| 89      | 195     | 60         | 137     | 303       | 234        | 684      | 315         | 73         |
| 75      | 1018    | 3028       | 1356    | 21        | 2810       | 1281     | 4           | 3616       |
| 14      | 274     | 108        | 2       | 4         | 155        | 1        | 483         | 89         |
| 12      | 0       | 362        | 2       | 106       | 6          | 133      | 7           | 51         |
| 50      | 111     | 578        | 51      | 0         | 687        | 2050     | 0           | 701        |

|      |     |      |     |      |      |     |      |      |
|------|-----|------|-----|------|------|-----|------|------|
| 3    | 19  | 144  | 20  | 1    | 407  | 0   | 0    | 175  |
| 0    | 562 | 463  | 226 | 336  | 9    | 17  | 415  | 376  |
| 28   | 28  | 2    | 81  | 0    | 6    | 80  | 996  | 2    |
| 74   | 20  | 908  | 34  | 1    | 1102 | 0   | 3    | 856  |
| 58   | 20  | 36   | 41  | 704  | 170  | 3   | 1197 | 30   |
| 241  | 410 | 919  | 63  | 363  | 213  | 365 | 181  | 1161 |
| 50   | 57  | 25   | 48  | 74   | 316  | 173 | 142  | 52   |
| 2    | 2   | 293  | 1   | 177  | 697  | 798 | 233  | 103  |
| 2320 | 17  | 1    | 0   | 0    | 6    | 1   | 0    | 0    |
| 264  | 49  | 595  | 192 | 216  | 875  | 0   | 3    | 629  |
| 74   | 214 | 292  | 119 | 150  | 166  | 369 | 149  | 32   |
| 56   | 70  | 0    | 106 | 245  | 0    | 0   | 1    | 0    |
| 86   | 9   | 887  | 134 | 0    | 662  | 44  | 0    | 476  |
| 62   | 66  | 92   | 75  | 140  | 97   | 91  | 129  | 96   |
| 4    | 5   | 72   | 0   | 10   | 58   | 259 | 57   | 68   |
| 257  | 237 | 182  | 96  | 52   | 98   | 23  | 33   | 91   |
| 96   | 46  | 23   | 186 | 0    | 91   | 30  | 4    | 17   |
| 53   | 17  | 2    | 3   | 0    | 0    | 1   | 252  | 0    |
| 29   | 706 | 239  | 62  | 198  | 588  | 130 | 255  | 318  |
| 232  | 114 | 625  | 498 | 277  | 1294 | 4   | 627  | 986  |
| 73   | 21  | 193  | 59  | 6    | 940  | 88  | 54   | 228  |
| 68   | 214 | 282  | 76  | 23   | 163  | 143 | 180  | 344  |
| 0    | 0   | 0    | 0   | 0    | 0    | 0   | 0    | 0    |
| 180  | 164 | 318  | 270 | 12   | 90   | 178 | 107  | 621  |
| 55   | 293 | 37   | 153 | 34   | 39   | 33  | 18   | 56   |
| 279  | 216 | 118  | 209 | 27   | 22   | 19  | 52   | 272  |
| 4    | 3   | 284  | 2   | 28   | 0    | 64  | 170  | 3    |
| 68   | 81  | 332  | 560 | 108  | 178  | 555 | 1004 | 162  |
| 138  | 55  | 292  | 220 | 72   | 521  | 5   | 367  | 463  |
| 166  | 303 | 0    | 50  | 0    | 0    | 5   | 13   | 0    |
| 150  | 78  | 159  | 163 | 34   | 124  | 238 | 44   | 119  |
| 485  | 432 | 2015 | 589 | 1315 | 2609 | 21  | 1554 | 2177 |
| 77   | 213 | 564  | 261 | 216  | 1134 | 232 | 160  | 336  |
| 60   | 70  | 53   | 28  | 188  | 53   | 342 | 703  | 10   |
| 102  | 139 | 78   | 126 | 150  | 171  | 157 | 96   | 126  |
| 618  | 285 | 27   | 220 | 217  | 9    | 38  | 23   | 103  |
| 15   | 111 | 7    | 88  | 3    | 0    | 0   | 241  | 0    |
| 151  | 17  | 576  | 51  | 19   | 228  | 124 | 183  | 657  |
| 8    | 0   | 67   | 20  | 0    | 167  | 376 | 0    | 134  |
| 76   | 0   | 180  | 65  | 3    | 259  | 196 | 191  | 298  |
| 2    | 268 | 81   | 2   | 0    | 792  | 0   | 0    | 258  |
| 185  | 231 | 156  | 288 | 146  | 162  | 659 | 111  | 116  |
| 612  | 95  | 195  | 39  | 234  | 220  | 198 | 166  | 308  |
| 582  | 3   | 0    | 0   | 0    | 0    | 0   | 0    | 0    |
| 48   | 99  | 39   | 186 | 48   | 66   | 85  | 16   | 198  |
| 77   | 68  | 272  | 117 | 179  | 589  | 704 | 151  | 371  |
| 93   | 169 | 26   | 70  | 75   | 16   | 57  | 32   | 21   |
| 532  | 354 | 81   | 309 | 114  | 145  | 78  | 1    | 136  |
| 71   | 80  | 574  | 111 | 78   | 378  | 0   | 0    | 674  |
| 532  | 368 | 180  | 156 | 9    | 259  | 227 | 37   | 55   |

|      |      |      |      |       |      |      |      |      |
|------|------|------|------|-------|------|------|------|------|
| 413  | 371  | 104  | 33   | 528   | 91   | 148  | 53   | 145  |
| 46   | 367  | 239  | 113  | 193   | 190  | 115  | 335  | 641  |
| 15   | 23   | 0    | 50   | 296   | 0    | 0    | 0    | 0    |
| 51   | 53   | 134  | 17   | 132   | 124  | 0    | 294  | 120  |
| 83   | 108  | 427  | 159  | 1     | 347  | 3    | 0    | 516  |
| 7    | 20   | 0    | 0    | 0     | 0    | 1    | 124  | 0    |
| 217  | 426  | 353  | 412  | 135   | 562  | 198  | 128  | 268  |
| 3    | 54   | 1    | 4    | 4     | 2    | 1    | 58   | 2    |
| 0    | 10   | 8    | 3    | 0     | 12   | 74   | 0    | 11   |
| 986  | 192  | 2145 | 649  | 845   | 2890 | 1    | 4    | 2226 |
| 117  | 75   | 26   | 47   | 214   | 111  | 1    | 235  | 66   |
| 499  | 125  | 0    | 4    | 1     | 2    | 127  | 393  | 1    |
| 22   | 14   | 144  | 28   | 242   | 180  | 2    | 332  | 174  |
| 369  | 165  | 273  | 85   | 91    | 431  | 117  | 147  | 155  |
| 49   | 7    | 81   | 31   | 22    | 541  | 146  | 23   | 62   |
| 71   | 44   | 237  | 166  | 221   | 517  | 229  | 48   | 174  |
| 22   | 20   | 121  | 127  | 0     | 342  | 29   | 0    | 16   |
| 158  | 44   | 210  | 143  | 81    | 237  | 390  | 233  | 197  |
| 381  | 295  | 86   | 243  | 70    | 55   | 168  | 55   | 30   |
| 7    | 27   | 705  | 9    | 99    | 0    | 222  | 412  | 7    |
| 141  | 2    | 81   | 430  | 0     | 73   | 20   | 0    | 97   |
| 3010 | 5442 | 0    | 8335 | 10524 | 1    | 1    | 1    | 5    |
| 218  | 115  | 75   | 129  | 93    | 154  | 267  | 70   | 60   |
| 76   | 80   | 29   | 48   | 22    | 47   | 115  | 69   | 22   |
| 80   | 50   | 55   | 49   | 356   | 0    | 1    | 371  | 42   |
| 1    | 2    | 280  | 25   | 0     | 92   | 264  | 0    | 114  |
| 8    | 54   | 327  | 69   | 0     | 917  | 0    | 2    | 428  |
| 141  | 163  | 55   | 98   | 53    | 240  | 20   | 19   | 26   |
| 248  | 177  | 61   | 80   | 26    | 373  | 459  | 38   | 95   |
| 1    | 23   | 47   | 95   | 1     | 0    | 419  | 293  | 246  |
| 80   | 45   | 50   | 24   | 104   | 130  | 1    | 251  | 93   |
| 247  | 82   | 153  | 100  | 19    | 307  | 14   | 41   | 49   |
| 65   | 43   | 0    | 61   | 0     | 0    | 0    | 0    | 0    |
| 22   | 33   | 654  | 123  | 0     | 21   | 1    | 0    | 1583 |
| 162  | 15   | 3    | 68   | 91    | 21   | 30   | 15   | 68   |
| 12   | 17   | 199  | 23   | 179   | 478  | 4    | 323  | 298  |
| 146  | 110  | 519  | 164  | 355   | 669  | 5    | 409  | 534  |
| 1090 | 1301 | 345  | 659  | 973   | 523  | 1600 | 2142 | 1549 |
| 9    | 8    | 377  | 12   | 8     | 74   | 88   | 12   | 76   |
| 122  | 141  | 61   | 95   | 0     | 0    | 92   | 299  | 0    |
| 70   | 79   | 281  | 32   | 85    | 40   | 712  | 202  | 367  |
| 259  | 86   | 204  | 228  | 158   | 172  | 472  | 71   | 59   |
| 44   | 108  | 58   | 62   | 6     | 108  | 102  | 44   | 76   |
| 3    | 159  | 0    | 20   | 1     | 0    | 0    | 0    | 0    |
| 7    | 16   | 316  | 4    | 49    | 0    | 115  | 182  | 2    |
| 12   | 19   | 77   | 8    | 72    | 37   | 1    | 34   | 65   |
| 189  | 158  | 155  | 156  | 72    | 66   | 286  | 161  | 107  |
| 66   | 316  | 7    | 89   | 53    | 31   | 1    | 140  | 19   |
| 1    | 0    | 188  | 0    | 1     | 118  | 39   | 0    | 357  |
| 13   | 17   | 150  | 0    | 5     | 2999 | 1852 | 1    | 42   |

|              |              |              |              |              |              |              |              |              |
|--------------|--------------|--------------|--------------|--------------|--------------|--------------|--------------|--------------|
| 11           | 39           | 15           | 85           | 42           | 3            | 1            | 70           | 110          |
| 238          | 96           | 0            | 47           | 2            | 0            | 0            | 1            | 2            |
| 1            | 1            | 82           | 8            | 5            | 64           | 3            | 27           | 172          |
| 59           | 20           | 0            | 0            | 0            | 0            | 0            | 3            | 0            |
| 9            | 17           | 138          | 23           | 128          | 369          | 1            | 232          | 224          |
| 56           | 58           | 187          | 75           | 118          | 60           | 71           | 453          | 367          |
| 10           | 9            | 0            | 2            | 153          | 0            | 1            | 174          | 0            |
| 4            | 7            | 20           | 8            | 8            | 22           | 30           | 33           | 27           |
| 23           | 12           | 9            | 4            | 28           | 39           | 144          | 148          | 15           |
| 15           | 109          | 222          | 213          | 88           | 256          | 448          | 77           | 209          |
| 302          | 148          | 1352         | 31           | 253          | 1568         | 4658         | 993          | 1424         |
| 95           | 130          | 65           | 32           | 110          | 105          | 32           | 29           | 66           |
| 165          | 55           | 26           | 87           | 23           | 2            | 26           | 14           | 47           |
| 67           | 303          | 86           | 75           | 93           | 3            | 67           | 29           | 205          |
| 0            | 0            | 0            | 0            | 0            | 55           | 105          | 0            | 0            |
| <b>26589</b> | <b>25366</b> | <b>31983</b> | <b>23060</b> | <b>26841</b> | <b>39020</b> | <b>28785</b> | <b>26299</b> | <b>34255</b> |

| B16.R.WT.f | 120.NR.are | 81.R.are.f | 125.NR.are | 130.NR.are | 129.NR.are | 80.R.are.f | 118.NR.are | B20.R.WT.r |
|------------|------------|------------|------------|------------|------------|------------|------------|------------|
| 9          | 3          | 8          | 3          | 2931       | 1          | 9671       | 17         | 4059       |
| 900        | 1660       | 286        | 5          | 237        | 352        | 355        | 1634       | 1832       |
| 0          | 2          | 0          | 1          | 4          | 0          | 2          | 1          | 0          |
| 86         | 93         | 0          | 83         | 203        | 116        | 0          | 48         | 127        |
| 310        | 332        | 226        | 200        | 141        | 97         | 443        | 131        | 351        |
| 421        | 564        | 130        | 248        | 598        | 372        | 468        | 133        | 62         |
| 210        | 253        | 223        | 178        | 195        | 97         | 290        | 120        | 125        |
| 0          | 390        | 1          | 0          | 5          | 0          | 0          | 553        | 0          |
| 71         | 73         | 45         | 90         | 108        | 97         | 111        | 73         | 193        |
| 203        | 125        | 71         | 77         | 214        | 51         | 163        | 118        | 84         |
| 9          | 0          | 11         | 0          | 1          | 0          | 793        | 17         | 305        |
| 7          | 80         | 77         | 3          | 7          | 13         | 25         | 67         | 23         |
| 252        | 59         | 199        | 72         | 175        | 56         | 479        | 20         | 397        |
| 11         | 0          | 0          | 0          | 0          | 0          | 0          | 0          | 1          |
| 341        | 87         | 114        | 160        | 225        | 28         | 188        | 144        | 211        |
| 7          | 12         | 160        | 178        | 0          | 0          | 51         | 24         | 0          |
| 210        | 136        | 135        | 97         | 169        | 39         | 247        | 432        | 259        |
| 40         | 135        | 162        | 206        | 61         | 40         | 79         | 256        | 79         |
| 71         | 283        | 144        | 48         | 175        | 30         | 100        | 324        | 8          |
| 40         | 119        | 225        | 8          | 46         | 24         | 114        | 158        | 59         |
| 1          | 170        | 116        | 53         | 28         | 266        | 38         | 186        | 1          |
| 155        | 108        | 1          | 100        | 66         | 72         | 1          | 45         | 1          |
| 732        | 7          | 788        | 0          | 2          | 1          | 1          | 1154       | 0          |
| 31         | 2          | 667        | 5          | 1235       | 491        | 969        | 0          | 292        |
| 315        | 321        | 233        | 224        | 150        | 87         | 275        | 253        | 155        |
| 160        | 12         | 9          | 64         | 71         | 10         | 21         | 60         | 34         |
| 662        | 13         | 688        | 1          | 2          | 0          | 3          | 1061       | 3          |
| 55         | 106        | 65         | 39         | 133        | 112        | 99         | 99         | 141        |
| 331        | 713        | 327        | 647        | 1110       | 758        | 206        | 1120       | 443        |
| 12         | 186        | 37         | 54         | 24         | 33         | 83         | 44         | 70         |
| 0          | 0          | 0          | 0          | 399        | 0          | 1252       | 1          | 544        |
| 0          | 144        | 0          | 109        | 0          | 30         | 0          | 23         | 0          |
| 7          | 191        | 3          | 74         | 14         | 43         | 6          | 106        | 23         |
| 157        | 48         | 103        | 117        | 36         | 0          | 212        | 46         | 540        |
| 4652       | 72         | 1484       | 44         | 25         | 32         | 666        | 18         | 1449       |
| 91         | 104        | 133        | 53         | 150        | 80         | 254        | 132        | 205        |
| 575        | 621        | 669        | 526        | 771        | 362        | 1006       | 1035       | 2          |
| 2          | 97         | 7          | 46         | 2          | 6          | 2          | 163        | 4          |
| 118        | 118        | 61         | 57         | 21         | 33         | 103        | 72         | 78         |
| 104        | 33         | 52         | 0          | 190        | 62         | 329        | 48         | 172        |
| 157        | 162        | 0          | 114        | 0          | 0          | 0          | 164        | 182        |
| 70         | 0          | 2          | 1          | 31         | 31         | 47         | 0          | 9          |
| 250        | 191        | 932        | 76         | 82         | 59         | 746        | 95         | 610        |
| 1410       | 203        | 672        | 0          | 294        | 164        | 227        | 1019       | 955        |
| 404        | 0          | 103        | 2          | 409        | 291        | 40         | 0          | 135        |
| 953        | 541        | 229        | 326        | 161        | 98         | 546        | 142        | 355        |
| 5          | 6227       | 11         | 3673       | 2428       | 2455       | 5          | 1250       | 4          |
| 169        | 645        | 150        | 1123       | 27         | 7          | 107        | 22         | 874        |
| 18         | 0          | 463        | 551        | 0          | 1          | 91         | 2          | 2          |
| 0          | 627        | 1          | 318        | 488        | 403        | 2          | 302        | 1          |

|      |      |      |     |      |     |      |      |      |
|------|------|------|-----|------|-----|------|------|------|
| 0    | 254  | 1    | 151 | 1    | 42  | 0    | 52   | 0    |
| 688  | 761  | 687  | 291 | 244  | 149 | 370  | 304  | 212  |
| 156  | 4    | 203  | 2   | 577  | 611 | 1487 | 213  | 409  |
| 0    | 20   | 10   | 253 | 17   | 0   | 1    | 185  | 3    |
| 650  | 149  | 441  | 400 | 116  | 29  | 1052 | 53   | 1188 |
| 659  | 983  | 440  | 403 | 537  | 142 | 299  | 406  | 327  |
| 161  | 259  | 389  | 61  | 240  | 38  | 634  | 72   | 243  |
| 194  | 39   | 41   | 289 | 139  | 15  | 292  | 22   | 123  |
| 0    | 1    | 8    | 4   | 4    | 2   | 0    | 3    | 0    |
| 76   | 777  | 420  | 4   | 2    | 0   | 0    | 399  | 0    |
| 318  | 173  | 685  | 67  | 117  | 44  | 48   | 573  | 40   |
| 80   | 0    | 105  | 0   | 1    | 0   | 0    | 137  | 1    |
| 0    | 21   | 4    | 41  | 16   | 14  | 982  | 83   | 0    |
| 146  | 77   | 128  | 77  | 123  | 48  | 90   | 48   | 71   |
| 85   | 110  | 33   | 58  | 120  | 130 | 74   | 32   | 8    |
| 33   | 173  | 650  | 44  | 14   | 1   | 1013 | 281  | 78   |
| 0    | 31   | 8    | 25  | 136  | 108 | 2    | 8    | 4    |
| 0    | 0    | 2    | 79  | 0    | 0   | 0    | 0    | 177  |
| 106  | 957  | 197  | 111 | 333  | 119 | 251  | 95   | 260  |
| 146  | 763  | 64   | 954 | 496  | 450 | 151  | 415  | 290  |
| 171  | 266  | 142  | 404 | 15   | 66  | 268  | 49   | 18   |
| 39   | 169  | 812  | 694 | 203  | 60  | 607  | 420  | 699  |
| 0    | 0    | 0    | 0   | 0    | 0   | 1197 | 0    | 485  |
| 117  | 176  | 66   | 135 | 199  | 90  | 328  | 5    | 236  |
| 39   | 136  | 297  | 133 | 16   | 25  | 134  | 223  | 229  |
| 308  | 106  | 332  | 5   | 28   | 24  | 438  | 154  | 102  |
| 84   | 348  | 0    | 356 | 23   | 0   | 3    | 50   | 0    |
| 35   | 231  | 142  | 426 | 1103 | 433 | 35   | 355  | 628  |
| 315  | 154  | 89   | 140 | 380  | 243 | 253  | 5    | 454  |
| 0    | 70   | 5    | 0   | 47   | 8   | 5    | 4    | 8    |
| 37   | 99   | 187  | 174 | 74   | 91  | 130  | 92   | 34   |
| 1835 | 1356 | 1105 | 614 | 1843 | 890 | 2480 | 1884 | 1822 |
| 366  | 544  | 492  | 246 | 220  | 82  | 31   | 357  | 88   |
| 1    | 312  | 12   | 10  | 182  | 42  | 121  | 184  | 141  |
| 101  | 297  | 98   | 233 | 155  | 58  | 135  | 184  | 94   |
| 165  | 278  | 253  | 81  | 6    | 17  | 293  | 75   | 22   |
| 101  | 32   | 63   | 15  | 10   | 35  | 75   | 61   | 91   |
| 68   | 220  | 415  | 220 | 190  | 172 | 199  | 102  | 201  |
| 0    | 395  | 80   | 215 | 128  | 37  | 117  | 119  | 0    |
| 85   | 402  | 82   | 307 | 87   | 53  | 680  | 83   | 375  |
| 37   | 0    | 1    | 13  | 1    | 0   | 0    | 0    | 0    |
| 76   | 299  | 248  | 190 | 152  | 92  | 160  | 234  | 226  |
| 410  | 657  | 164  | 294 | 24   | 23  | 243  | 113  | 77   |
| 0    | 0    | 6    | 0   | 0    | 0   | 0    | 0    | 0    |
| 28   | 176  | 83   | 24  | 94   | 18  | 62   | 183  | 4    |
| 135  | 266  | 123  | 126 | 389  | 208 | 207  | 230  | 284  |
| 26   | 24   | 83   | 16  | 51   | 16  | 198  | 29   | 75   |
| 27   | 114  | 2    | 111 | 228  | 110 | 64   | 0    | 1    |
| 310  | 299  | 2    | 1   | 0    | 0   | 1    | 88   | 0    |
| 28   | 116  | 129  | 11  | 107  | 99  | 69   | 137  | 49   |

|      |      |      |      |      |      |     |      |      |
|------|------|------|------|------|------|-----|------|------|
| 496  | 143  | 80   | 20   | 184  | 194  | 219 | 106  | 160  |
| 291  | 274  | 33   | 353  | 75   | 77   | 115 | 86   | 80   |
| 107  | 1    | 123  | 0    | 0    | 1    | 0   | 171  | 0    |
| 203  | 30   | 146  | 39   | 228  | 89   | 438 | 73   | 666  |
| 1    | 555  | 2    | 376  | 170  | 144  | 1   | 462  | 2    |
| 1    | 0    | 0    | 0    | 62   | 186  | 0   | 0    | 104  |
| 562  | 611  | 340  | 379  | 253  | 122  | 15  | 461  | 240  |
| 57   | 1    | 91   | 0    | 4    | 2    | 25  | 0    | 32   |
| 2    | 48   | 2    | 43   | 14   | 5    | 89  | 195  | 0    |
| 338  | 2704 | 1459 | 8    | 3    | 0    | 9   | 1582 | 0    |
| 219  | 419  | 84   | 53   | 258  | 163  | 623 | 28   | 270  |
| 1    | 218  | 58   | 257  | 101  | 21   | 86  | 6    | 398  |
| 282  | 261  | 174  | 264  | 82   | 36   | 407 | 180  | 306  |
| 554  | 200  | 92   | 283  | 76   | 92   | 161 | 172  | 75   |
| 23   | 0    | 37   | 1    | 50   | 78   | 59  | 0    | 32   |
| 177  | 130  | 131  | 98   | 145  | 19   | 326 | 151  | 262  |
| 0    | 0    | 1    | 55   | 238  | 64   | 0   | 92   | 2    |
| 98   | 200  | 163  | 255  | 541  | 105  | 271 | 276  | 79   |
| 73   | 141  | 52   | 197  | 117  | 57   | 133 | 209  | 79   |
| 208  | 1024 | 0    | 1035 | 60   | 0    | 3   | 145  | 2    |
| 0    | 22   | 4    | 19   | 2    | 26   | 8   | 109  | 0    |
| 3755 | 48   | 4528 | 2    | 3    | 2    | 3   | 6603 | 7    |
| 28   | 1    | 130  | 66   | 376  | 181  | 347 | 118  | 162  |
| 20   | 49   | 66   | 18   | 150  | 81   | 122 | 62   | 123  |
| 348  | 156  | 161  | 189  | 0    | 1    | 352 | 80   | 270  |
| 0    | 210  | 2    | 13   | 32   | 11   | 0   | 305  | 1    |
| 2    | 597  | 0    | 380  | 0    | 77   | 0   | 72   | 0    |
| 47   | 447  | 27   | 179  | 42   | 10   | 21  | 160  | 21   |
| 483  | 86   | 384  | 95   | 106  | 93   | 349 | 24   | 126  |
| 196  | 392  | 3    | 111  | 19   | 51   | 0   | 96   | 33   |
| 81   | 52   | 121  | 277  | 214  | 153  | 288 | 26   | 459  |
| 10   | 86   | 4    | 39   | 281  | 117  | 116 | 87   | 56   |
| 0    | 254  | 0    | 3    | 0    | 0    | 0   | 412  | 0    |
| 0    | 435  | 162  | 7    | 402  | 436  | 238 | 54   | 722  |
| 189  | 17   | 47   | 25   | 85   | 205  | 171 | 1    | 56   |
| 234  | 138  | 72   | 149  | 176  | 89   | 70  | 98   | 146  |
| 443  | 415  | 253  | 184  | 504  | 243  | 683 | 489  | 479  |
| 1260 | 1578 | 740  | 852  | 1354 | 1056 | 4   | 344  | 3638 |
| 19   | 6    | 10   | 6    | 83   | 281  | 6   | 18   | 0    |
| 0    | 3    | 0    | 165  | 241  | 101  | 1   | 62   | 121  |
| 164  | 125  | 165  | 38   | 318  | 123  | 303 | 303  | 363  |
| 103  | 512  | 434  | 2    | 1    | 0    | 4   | 336  | 33   |
| 164  | 67   | 75   | 62   | 316  | 110  | 193 | 57   | 89   |
| 0    | 0    | 0    | 0    | 0    | 0    | 0   | 0    | 0    |
| 114  | 510  | 0    | 552  | 28   | 0    | 0   | 89   | 0    |
| 70   | 48   | 100  | 53   | 120  | 29   | 363 | 80   | 85   |
| 73   | 182  | 147  | 150  | 124  | 104  | 245 | 151  | 135  |
| 38   | 0    | 0    | 4    | 38   | 32   | 1   | 0    | 94   |
| 0    | 89   | 0    | 0    | 45   | 5    | 1   | 0    | 1    |
| 100  | 2101 | 0    | 1481 | 1992 | 741  | 3   | 871  | 1    |

|              |              |              |              |              |              |              |              |              |
|--------------|--------------|--------------|--------------|--------------|--------------|--------------|--------------|--------------|
| 50           | 308          | 19           | 130          | 6            | 0            | 28           | 37           | 23           |
| 0            | 0            | 0            | 336          | 1            | 0            | 0            | 2            | 0            |
| 1            | 8            | 37           | 284          | 352          | 43           | 96           | 0            | 109          |
| 15           | 0            | 3            | 0            | 0            | 0            | 34           | 0            | 45           |
| 138          | 91           | 71           | 129          | 125          | 77           | 73           | 64           | 115          |
| 22           | 192          | 319          | 86           | 55           | 26           | 26           | 335          | 110          |
| 39           | 7            | 0            | 0            | 188          | 0            | 4            | 0            | 91           |
| 26           | 29           | 19           | 15           | 11           | 17           | 27           | 317          | 26           |
| 89           | 3            | 24           | 85           | 0            | 0            | 19           | 2            | 136          |
| 74           | 505          | 180          | 318          | 344          | 186          | 182          | 295          | 59           |
| 1526         | 1951         | 528          | 863          | 2295         | 1597         | 1554         | 595          | 179          |
| 24           | 35           | 57           | 48           | 19           | 31           | 167          | 16           | 223          |
| 155          | 12           | 127          | 4            | 32           | 19           | 61           | 33           | 15           |
| 10           | 42           | 155          | 18           | 99           | 13           | 40           | 101          | 91           |
| 0            | 0            | 0            | 0            | 0            | 0            | 0            | 0            | 0            |
| <b>31223</b> | <b>41504</b> | <b>27240</b> | <b>26571</b> | <b>27507</b> | <b>16840</b> | <b>28633</b> | <b>30564</b> | <b>26146</b> |



| H43.NR.W | 82.R.are.f | SPF.510 | B19.R.are.r | 123.NR.are | 113.NR.W | H36.NR.W | 122.NR.are | B22.R.W | T.f |
|----------|------------|---------|-------------|------------|----------|----------|------------|---------|-----|
| 1686     | 26         | 876     | 5542        | 9          | 1533     | 1601     | 0          | 19      |     |
| 2365     | 826        | 1551    | 932         | 222        | 1376     | 386      | 1          | 638     |     |
| 0        | 0          | 151     | 0           | 1          | 0        | 1        | 1          | 0       |     |
| 4        | 0          | 92      | 207         | 114        | 84       | 119      | 119        | 131     |     |
| 224      | 146        | 238     | 176         | 178        | 245      | 260      | 495        | 241     |     |
| 520      | 90         | 22      | 85          | 166        | 287      | 398      | 313        | 360     |     |
| 253      | 167        | 94      | 175         | 248        | 123      | 440      | 253        | 227     |     |
| 0        | 0          | 69      | 0           | 0          | 0        | 0        | 0          | 0       |     |
| 38       | 123        | 94      | 81          | 215        | 63       | 142      | 158        | 128     |     |
| 46       | 90         | 97      | 63          | 149        | 233      | 72       | 165        | 37      |     |
| 0        | 14         | 0       | 395         | 0          | 0        | 0        | 0          | 0       |     |
| 6        | 16         | 26      | 65          | 3          | 285      | 18       | 37         | 27      |     |
| 890      | 358        | 64      | 135         | 130        | 146      | 293      | 266        | 175     |     |
| 0        | 21         | 5       | 4           | 0          | 0        | 0        | 0          | 4       |     |
| 40       | 186        | 11      | 73          | 99         | 124      | 239      | 255        | 442     |     |
| 22       | 231        | 12      | 87          | 87         | 44       | 82       | 440        | 92      |     |
| 0        | 188        | 110     | 78          | 289        | 125      | 170      | 99         | 107     |     |
| 77       | 168        | 191     | 78          | 70         | 351      | 167      | 149        | 90      |     |
| 150      | 85         | 147     | 27          | 230        | 61       | 201      | 186        | 55      |     |
| 19       | 36         | 79      | 64          | 37         | 173      | 78       | 36         | 15      |     |
| 44       | 14         | 0       | 4           | 23         | 53       | 89       | 1          | 25      |     |
| 25       | 0          | 56      | 1           | 118        | 60       | 112      | 92         | 1       |     |
| 7        | 1865       | 1       | 0           | 0          | 0        | 1        | 0          | 1       |     |
| 540      | 804        | 871     | 1210        | 0          | 5        | 1        | 1          | 261     |     |
| 290      | 217        | 291     | 205         | 162        | 205      | 253      | 483        | 268     |     |
| 109      | 12         | 57      | 27          | 30         | 53       | 95       | 119        | 14      |     |
| 5        | 1701       | 2       | 6           | 1          | 2        | 3        | 1          | 1       |     |
| 90       | 87         | 118     | 54          | 72         | 149      | 145      | 189        | 77      |     |
| 290      | 395        | 1005    | 483         | 333        | 1147     | 853      | 843        | 369     |     |
| 53       | 8          | 94      | 51          | 58         | 43       | 50       | 38         | 90      |     |
| 205      | 0          | 91      | 772         | 0          | 201      | 217      | 0          | 8       |     |
| 0        | 0          | 75      | 0           | 74         | 67       | 77       | 109        | 0       |     |
| 24       | 314        | 1       | 129         | 17         | 30       | 3        | 12         | 176     |     |
| 269      | 112        | 40      | 12          | 29         | 64       | 25       | 156        | 454     |     |
| 29       | 1053       | 17      | 1407        | 17         | 32       | 36       | 56         | 2281    |     |
| 40       | 70         | 205     | 123         | 82         | 123      | 187      | 85         | 58      |     |
| 429      | 969        | 154     | 1           | 803        | 241      | 760      | 779        | 6       |     |
| 25       | 59         | 11      | 22          | 12         | 167      | 407      | 99         | 58      |     |
| 76       | 52         | 109     | 51          | 66         | 47       | 112      | 117        | 131     |     |
| 77       | 71         | 139     | 213         | 2          | 3        | 183      | 0          | 219     |     |
| 5        | 2          | 76      | 85          | 122        | 66       | 1        | 176        | 231     |     |
| 0        | 4          | 20      | 5           | 15         | 0        | 0        | 5          | 0       |     |
| 31       | 270        | 950     | 330         | 464        | 310      | 413      | 1577       | 227     |     |
| 1        | 616        | 10      | 507         | 0          | 0        | 1        | 8          | 1145    |     |
| 867      | 344        | 583     | 41          | 2          | 3        | 0        | 0          | 794     |     |
| 1457     | 255        | 336     | 332         | 414        | 102      | 147      | 373        | 74      |     |
| 1593     | 1          | 3482    | 3           | 1033       | 3671     | 4239     | 3530       | 13      |     |
| 36       | 4          | 14      | 232         | 1312       | 303      | 17       | 494        | 21      |     |
| 52       | 698        | 12      | 236         | 123        | 57       | 140      | 1445       | 39      |     |
| 1604     | 0          | 181     | 0           | 743        | 175      | 461      | 453        | 5       |     |

|     |      |     |      |      |      |      |      |      |
|-----|------|-----|------|------|------|------|------|------|
| 0   | 0    | 107 | 0    | 92   | 88   | 154  | 186  | 1    |
| 27  | 153  | 3   | 19   | 312  | 569  | 373  | 698  | 141  |
| 439 | 157  | 348 | 392  | 514  | 5    | 92   | 10   | 13   |
| 3   | 1    | 38  | 0    | 573  | 462  | 843  | 302  | 9    |
| 6   | 940  | 4   | 440  | 328  | 9    | 194  | 396  | 1190 |
| 467 | 202  | 567 | 239  | 357  | 772  | 403  | 723  | 422  |
| 354 | 166  | 39  | 83   | 350  | 17   | 589  | 41   | 211  |
| 585 | 20   | 713 | 163  | 216  | 166  | 609  | 214  | 86   |
| 7   | 861  | 1   | 71   | 3    | 2    | 1    | 4    | 720  |
| 0   | 41   | 15  | 2    | 179  | 1032 | 975  | 0    | 38   |
| 124 | 91   | 66  | 24   | 123  | 179  | 211  | 108  | 57   |
| 1   | 267  | 0   | 1    | 0    | 0    | 0    | 0    | 0    |
| 55  | 212  | 31  | 1370 | 16   | 65   | 299  | 20   | 0    |
| 87  | 109  | 82  | 98   | 92   | 90   | 104  | 85   | 179  |
| 94  | 17   | 3   | 23   | 26   | 50   | 94   | 84   | 39   |
| 233 | 199  | 81  | 38   | 1022 | 81   | 6    | 688  | 286  |
| 29  | 10   | 342 | 0    | 13   | 20   | 85   | 41   | 7    |
| 0   | 2    | 13  | 22   | 0    | 9    | 2    | 0    | 145  |
| 212 | 10   | 178 | 166  | 566  | 57   | 34   | 283  | 84   |
| 246 | 193  | 310 | 295  | 1008 | 258  | 866  | 963  | 1192 |
| 214 | 200  | 51  | 28   | 149  | 146  | 453  | 294  | 46   |
| 23  | 234  | 294 | 74   | 244  | 935  | 283  | 697  | 77   |
| 1   | 0    | 0   | 706  | 0    | 0    | 0    | 0    | 3    |
| 18  | 138  | 48  | 202  | 372  | 227  | 278  | 380  | 3    |
| 71  | 73   | 199 | 193  | 320  | 160  | 28   | 157  | 57   |
| 55  | 308  | 10  | 217  | 6    | 450  | 370  | 38   | 259  |
| 3   | 119  | 20  | 21   | 0    | 17   | 0    | 485  | 141  |
| 308 | 188  | 36  | 204  | 141  | 272  | 125  | 67   | 843  |
| 117 | 169  | 287 | 160  | 133  | 164  | 725  | 88   | 835  |
| 4   | 8    | 131 | 9    | 8    | 0    | 0    | 2    | 2    |
| 89  | 164  | 177 | 22   | 56   | 124  | 105  | 111  | 77   |
| 374 | 2250 | 818 | 1182 | 1655 | 879  | 2261 | 2016 | 5499 |
| 239 | 109  | 213 | 137  | 218  | 625  | 386  | 565  | 401  |
| 311 | 12   | 385 | 1    | 3    | 70   | 34   | 19   | 321  |
| 247 | 91   | 154 | 133  | 206  | 117  | 236  | 403  | 193  |
| 40  | 155  | 57  | 306  | 84   | 176  | 331  | 491  | 3    |
| 0   | 142  | 44  | 131  | 1    | 0    | 17   | 9    | 255  |
| 27  | 164  | 75  | 65   | 216  | 342  | 220  | 172  | 54   |
| 127 | 46   | 26  | 0    | 501  | 77   | 53   | 715  | 2    |
| 38  | 16   | 63  | 94   | 190  | 163  | 134  | 531  | 100  |
| 0   | 0    | 15  | 0    | 295  | 230  | 244  | 0    | 3    |
| 431 | 156  | 466 | 268  | 81   | 308  | 256  | 155  | 184  |
| 181 | 261  | 49  | 24   | 202  | 287  | 495  | 436  | 321  |
| 1   | 202  | 0   | 29   | 0    | 0    | 0    | 0    | 204  |
| 87  | 56   | 64  | 9    | 108  | 37   | 99   | 128  | 38   |
| 587 | 163  | 145 | 181  | 234  | 119  | 520  | 139  | 128  |
| 30  | 39   | 24  | 115  | 7    | 41   | 90   | 19   | 255  |
| 208 | 225  | 267 | 79   | 1    | 0    | 136  | 2    | 122  |
| 1   | 0    | 0   | 0    | 2    | 306  | 468  | 1    | 1    |
| 120 | 110  | 64  | 195  | 121  | 100  | 89   | 7    | 178  |

|      |       |      |      |      |      |      |      |      |
|------|-------|------|------|------|------|------|------|------|
| 637  | 86    | 112  | 71   | 54   | 158  | 216  | 42   | 6    |
| 212  | 21    | 100  | 41   | 215  | 475  | 407  | 168  | 292  |
| 0    | 301   | 0    | 1    | 0    | 0    | 0    | 0    | 0    |
| 5    | 215   | 0    | 481  | 105  | 46   | 76   | 57   | 241  |
| 80   | 2     | 186  | 4    | 590  | 129  | 133  | 273  | 6    |
| 0    | 0     | 58   | 65   | 0    | 1    | 0    | 1    | 162  |
| 203  | 208   | 207  | 199  | 754  | 793  | 350  | 275  | 111  |
| 3    | 1     | 5    | 1    | 43   | 0    | 2    | 50   | 10   |
| 51   | 0     | 4    | 0    | 564  | 41   | 14   | 356  | 6    |
| 1    | 209   | 32   | 6    | 752  | 4031 | 3809 | 3    | 119  |
| 0    | 143   | 151  | 226  | 169  | 57   | 121  | 8    | 55   |
| 410  | 207   | 445  | 53   | 118  | 0    | 0    | 198  | 286  |
| 34   | 319   | 10   | 160  | 191  | 77   | 95   | 340  | 812  |
| 142  | 96    | 58   | 216  | 135  | 174  | 321  | 241  | 538  |
| 100  | 46    | 17   | 57   | 0    | 48   | 50   | 0    | 48   |
| 396  | 266   | 170  | 193  | 48   | 77   | 275  | 67   | 709  |
| 3    | 101   | 165  | 27   | 16   | 23   | 69   | 0    | 62   |
| 121  | 313   | 147  | 187  | 96   | 82   | 259  | 348  | 313  |
| 74   | 39    | 44   | 22   | 42   | 156  | 177  | 213  | 71   |
| 5    | 383   | 72   | 54   | 0    | 36   | 0    | 1271 | 435  |
| 8    | 81    | 45   | 48   | 34   | 126  | 91   | 36   | 0    |
| 33   | 10569 | 13   | 20   | 3    | 1    | 1    | 0    | 3    |
| 367  | 206   | 130  | 389  | 42   | 42   | 181  | 58   | 256  |
| 89   | 65    | 103  | 74   | 48   | 64   | 22   | 57   | 9    |
| 8    | 214   | 91   | 97   | 170  | 70   | 0    | 156  | 609  |
| 18   | 0     | 3    | 0    | 57   | 279  | 66   | 56   | 1    |
| 1    | 1     | 282  | 1    | 232  | 269  | 364  | 424  | 1    |
| 20   | 24    | 382  | 25   | 215  | 118  | 20   | 206  | 72   |
| 268  | 120   | 70   | 102  | 1    | 216  | 182  | 148  | 141  |
| 144  | 0     | 422  | 71   | 170  | 22   | 72   | 258  | 289  |
| 0    | 242   | 47   | 160  | 435  | 16   | 93   | 252  | 73   |
| 22   | 89    | 330  | 158  | 36   | 81   | 35   | 144  | 24   |
| 0    | 0     | 39   | 0    | 5    | 0    | 0    | 2    | 0    |
| 58   | 503   | 3265 | 851  | 1469 | 697  | 125  | 2    | 477  |
| 394  | 127   | 125  | 23   | 29   | 145  | 89   | 46   | 2    |
| 71   | 162   | 44   | 75   | 254  | 83   | 264  | 191  | 941  |
| 120  | 541   | 212  | 260  | 393  | 233  | 634  | 530  | 1379 |
| 1946 | 496   | 1586 | 1383 | 1218 | 1230 | 2127 | 1393 | 720  |
| 16   | 106   | 14   | 61   | 1    | 194  | 152  | 41   | 0    |
| 199  | 43    | 137  | 152  | 74   | 257  | 0    | 399  | 0    |
| 842  | 176   | 112  | 196  | 175  | 136  | 250  | 225  | 138  |
| 130  | 1     | 188  | 285  | 234  | 295  | 1    | 272  | 204  |
| 73   | 3     | 246  | 66   | 99   | 108  | 145  | 59   | 96   |
| 0    | 0     | 75   | 0    | 0    | 0    | 0    | 0    | 0    |
| 4    | 195   | 36   | 30   | 0    | 19   | 0    | 612  | 196  |
| 5    | 86    | 14   | 27   | 103  | 67   | 56   | 40   | 34   |
| 124  | 235   | 159  | 154  | 48   | 164  | 298  | 295  | 69   |
| 7    | 0     | 60   | 116  | 0    | 0    | 99   | 1    | 366  |
| 189  | 2     | 58   | 123  | 0    | 9    | 113  | 0    | 30   |
| 285  | 8     | 577  | 1    | 476  | 1192 | 1470 | 2809 | 1    |

|              |              |              |              |              |              |              |              |              |
|--------------|--------------|--------------|--------------|--------------|--------------|--------------|--------------|--------------|
| 0            | 75           | 6            | 50           | 22           | 21           | 33           | 309          | 26           |
| 0            | 1            | 39           | 1            | 95           | 1            | 2            | 265          | 1            |
| 3            | 280          | 44           | 14           | 0            | 145          | 98           | 14           | 16           |
| 0            | 19           | 0            | 5            | 0            | 0            | 0            | 0            | 160          |
| 56           | 181          | 40           | 58           | 174          | 55           | 191          | 132          | 662          |
| 101          | 109          | 83           | 42           | 168          | 220          | 98           | 156          | 280          |
| 0            | 6            | 28           | 37           | 0            | 0            | 0            | 0            | 23           |
| 23           | 27           | 10           | 25           | 24           | 12           | 34           | 9            | 15           |
| 57           | 65           | 21           | 67           | 23           | 0            | 98           | 128          | 121          |
| 223          | 201          | 241          | 91           | 113          | 142          | 429          | 435          | 46           |
| 1540         | 354          | 70           | 270          | 576          | 1059         | 1510         | 1177         | 1004         |
| 17           | 51           | 42           | 44           | 43           | 41           | 36           | 96           | 31           |
| 26           | 59           | 109          | 35           | 12           | 77           | 53           | 26           | 17           |
| 37           | 52           | 57           | 58           | 89           | 193          | 108          | 372          | 93           |
| 134          | 0            | 11           | 0            | 0            | 0            | 0            | 0            | 0            |
| <b>23378</b> | <b>32648</b> | <b>25071</b> | <b>19628</b> | <b>27806</b> | <b>30106</b> | <b>37488</b> | <b>37912</b> | <b>33635</b> |

| 77.R.WT.m | B13.R.are.r | SPF.495 | 111.NR.are |
|-----------|-------------|---------|------------|
| 20        | 16          | 652     | 547        |
| 480       | 3           | 710     | 672        |
| 0         | 0           | 96      | 2          |
| 131       | 157         | 82      | 106        |
| 117       | 42          | 256     | 326        |
| 341       | 164         | 59      | 144        |
| 220       | 312         | 84      | 281        |
| 1         | 0           | 58      | 0          |
| 148       | 99          | 113     | 140        |
| 63        | 39          | 40      | 128        |
| 19        | 17          | 7       | 0          |
| 42        | 18          | 20      | 105        |
| 555       | 406         | 38      | 370        |
| 169       | 5           | 6       | 1          |
| 371       | 34          | 15      | 207        |
| 1         | 7           | 148     | 24         |
| 143       | 185         | 21      | 282        |
| 69        | 152         | 84      | 169        |
| 42        | 78          | 147     | 147        |
| 32        | 15          | 119     | 41         |
| 33        | 90          | 0       | 86         |
| 206       | 237         | 63      | 71         |
| 1392      | 1041        | 282     | 0          |
| 493       | 5           | 0       | 0          |
| 324       | 326         | 162     | 184        |
| 133       | 189         | 25      | 111        |
| 1380      | 971         | 165     | 1          |
| 99        | 104         | 75      | 215        |
| 269       | 405         | 557     | 323        |
| 15        | 4           | 77      | 14         |
| 0         | 0           | 65      | 79         |
| 0         | 0           | 107     | 7          |
| 3         | 0           | 235     | 16         |
| 44        | 143         | 26      | 9          |
| 2208      | 2239        | 12      | 35         |
| 186       | 134         | 206     | 94         |
| 1118      | 1139        | 157     | 599        |
| 88        | 0           | 68      | 51         |
| 118       | 71          | 72      | 57         |
| 94        | 17          | 108     | 1          |
| 204       | 125         | 137     | 9          |
| 15        | 1           | 51      | 0          |
| 120       | 355         | 448     | 115        |
| 973       | 268         | 4       | 1          |
| 449       | 76          | 195     | 0          |
| 575       | 126         | 138     | 67         |
| 3         | 21          | 2232    | 3463       |
| 110       | 0           | 124     | 114        |
| 1         | 40          | 376     | 40         |
| 0         | 6           | 76      | 339        |

|     |      |     |      |
|-----|------|-----|------|
| 0   | 0    | 167 | 7    |
| 583 | 130  | 30  | 581  |
| 535 | 779  | 4   | 0    |
| 1   | 1    | 46  | 417  |
| 367 | 77   | 46  | 46   |
| 312 | 430  | 62  | 510  |
| 106 | 275  | 40  | 13   |
| 145 | 4    | 28  | 119  |
| 0   | 1386 | 0   | 0    |
| 8   | 1    | 514 | 343  |
| 227 | 24   | 97  | 23   |
| 202 | 122  | 14  | 2    |
| 0   | 19   | 39  | 23   |
| 95  | 77   | 93  | 52   |
| 72  | 35   | 1   | 39   |
| 31  | 120  | 90  | 52   |
| 0   | 6    | 122 | 61   |
| 85  | 56   | 8   | 11   |
| 174 | 37   | 362 | 109  |
| 267 | 129  | 732 | 381  |
| 651 | 635  | 42  | 135  |
| 113 | 91   | 111 | 638  |
| 0   | 0    | 0   | 0    |
| 175 | 400  | 109 | 826  |
| 28  | 25   | 115 | 43   |
| 64  | 315  | 40  | 950  |
| 55  | 288  | 25  | 7    |
| 86  | 207  | 323 | 149  |
| 310 | 12   | 246 | 243  |
| 97  | 2    | 24  | 0    |
| 90  | 329  | 91  | 45   |
| 889 | 1954 | 803 | 1372 |
| 316 | 652  | 281 | 428  |
| 83  | 1    | 102 | 4    |
| 221 | 303  | 94  | 154  |
| 256 | 450  | 126 | 183  |
| 10  | 76   | 18  | 0    |
| 65  | 66   | 25  | 234  |
| 0   | 0    | 15  | 56   |
| 254 | 102  | 108 | 242  |
| 0   | 0    | 425 | 48   |
| 357 | 155  | 205 | 42   |
| 164 | 389  | 181 | 244  |
| 0   | 339  | 0   | 0    |
| 31  | 44   | 66  | 90   |
| 187 | 172  | 213 | 327  |
| 220 | 34   | 77  | 2    |
| 156 | 121  | 270 | 0    |
| 264 | 354  | 107 | 606  |
| 54  | 86   | 181 | 10   |

|      |      |      |      |
|------|------|------|------|
| 489  | 212  | 113  | 157  |
| 72   | 77   | 124  | 539  |
| 220  | 144  | 5    | 0    |
| 345  | 497  | 12   | 155  |
| 0    | 4    | 98   | 537  |
| 0    | 0    | 0    | 0    |
| 267  | 128  | 284  | 592  |
| 26   | 1    | 3    | 0    |
| 2    | 0    | 82   | 20   |
| 27   | 3    | 1822 | 1119 |
| 24   | 0    | 163  | 53   |
| 68   | 36   | 92   | 0    |
| 302  | 188  | 32   | 157  |
| 186  | 429  | 365  | 70   |
| 49   | 132  | 25   | 50   |
| 336  | 71   | 199  | 131  |
| 180  | 7    | 75   | 23   |
| 165  | 319  | 143  | 115  |
| 96   | 9    | 56   | 37   |
| 157  | 770  | 80   | 13   |
| 0    | 31   | 76   | 59   |
| 8273 | 6370 | 1622 | 0    |
| 312  | 99   | 81   | 14   |
| 24   | 22   | 151  | 20   |
| 331  | 312  | 38   | 13   |
| 0    | 0    | 24   | 41   |
| 0    | 0    | 390  | 22   |
| 7    | 121  | 187  | 112  |
| 393  | 368  | 282  | 263  |
| 90   | 0    | 343  | 168  |
| 79   | 0    | 40   | 72   |
| 63   | 343  | 167  | 38   |
| 0    | 0    | 34   | 0    |
| 1    | 2    | 1077 | 1795 |
| 136  | 115  | 113  | 81   |
| 298  | 186  | 25   | 135  |
| 265  | 570  | 221  | 347  |
| 871  | 6    | 1040 | 1527 |
| 78   | 0    | 8    | 33   |
| 129  | 1    | 214  | 0    |
| 264  | 134  | 8    | 292  |
| 190  | 0    | 233  | 125  |
| 108  | 38   | 152  | 68   |
| 0    | 0    | 322  | 0    |
| 72   | 414  | 19   | 11   |
| 113  | 313  | 18   | 124  |
| 103  | 148  | 239  | 0    |
| 107  | 3    | 124  | 8    |
| 162  | 0    | 81   | 98   |
| 61   | 3    | 951  | 133  |

|              |              |              |              |
|--------------|--------------|--------------|--------------|
| 37           | 0            | 60           | 41           |
| 0            | 0            | 66           | 0            |
| 24           | 162          | 22           | 9            |
| 0            | 21           | 0            | 0            |
| 211          | 136          | 18           | 116          |
| 143          | 47           | 66           | 293          |
| 0            | 0            | 1            | 1            |
| 28           | 0            | 1            | 16           |
| 34           | 85           | 11           | 2            |
| 116          | 41           | 248          | 58           |
| 1236         | 603          | 191          | 517          |
| 47           | 49           | 24           | 10           |
| 85           | 34           | 85           | 39           |
| 89           | 60           | 49           | 173          |
| 0            | 1            | 280          | 0            |
| <b>32259</b> | <b>29793</b> | <b>24497</b> | <b>25494</b> |



taxonomy

Bacteria;Firmicutes;Clostridia;Clostridiales;Lachnospiraceae;Blautia;  
Bacteria;Firmicutes;Clostridia;Clostridiales;Lachnospiraceae;  
Bacteria;Bacteroidetes;Bacteroidia;Bacteroidales;Bacteroidaceae;Bacteroides;  
Bacteria;Bacteroidetes;Bacteroidia;Bacteroidales;Rikenellaceae;Rikenella;  
Bacteria;Firmicutes;Clostridia;Clostridiales;Ruminococcaceae;Oscillospira;  
Bacteria;Firmicutes;Clostridia;Clostridiales;Lachnospiraceae;  
Bacteria;Firmicutes;Clostridia;Clostridiales;Ruminococcaceae;Oscillospira;  
Bacteria;Bacteroidetes;Bacteroidia;Bacteroidales;Bacteroidaceae;Bacteroides;acidifaciens;  
Bacteria;Bacteroidetes;Bacteroidia;Bacteroidales;Porphyromonadaceae;Barnesiella;  
Bacteria;Firmicutes;Clostridia;Clostridiales;Lachnospiraceae;  
Bacteria;Firmicutes;Clostridia;Clostridiales;Lachnospiraceae;Blautia;  
Bacteria;Firmicutes;Clostridia;Clostridiales;Lachnospiraceae;  
Bacteria;Bacteroidetes;Bacteroidia;Bacteroidales;Porphyromonadaceae;Barnesiella;  
Bacteria;Firmicutes;Clostridia;Clostridiales;Lachnospiraceae;Blautia;  
Bacteria;Bacteroidetes;Bacteroidia;Bacteroidales;Porphyromonadaceae;Barnesiella;  
Bacteria;Firmicutes;Bacilli;Lactobacillales;Lactobacillaceae;Lactobacillus;  
Bacteria;Bacteroidetes;Bacteroidia;Bacteroidales;Porphyromonadaceae;Parabacteroides;distasonis;  
Bacteria;Firmicutes;Clostridia;Clostridiales;Lachnospiraceae;Ruminococcus;gnavus;  
Bacteria;Firmicutes;Clostridia;Clostridiales;Lachnospiraceae;  
Bacteria;Firmicutes;Clostridia;Clostridiales;Lachnospiraceae;  
Bacteria;Firmicutes;Clostridia;Clostridiales;Lachnospiraceae;  
Bacteria;Bacteroidetes;Bacteroidia;Bacteroidales;Porphyromonadaceae;Barnesiella;  
Bacteria;Firmicutes;Clostridia;Clostridiales;Lachnospiraceae;Blautia;  
Bacteria;Firmicutes;Clostridia;Clostridiales;Lachnospiraceae;  
Bacteria;Firmicutes;Clostridia;Clostridiales;Ruminococcaceae;Oscillospira;  
Bacteria;Firmicutes;Clostridia;Clostridiales;Ruminococcaceae;Oscillospira;  
Bacteria;Firmicutes;Clostridia;Clostridiales;Lachnospiraceae;Blautia;  
Bacteria;Firmicutes;Clostridia;Clostridiales;Lachnospiraceae;  
Bacteria;Firmicutes;Clostridia;Clostridiales;Lachnospiraceae;Roseburia;  
Bacteria;Firmicutes;Clostridia;Clostridiales;Lachnospiraceae;  
Bacteria;Firmicutes;Clostridia;Clostridiales;Lachnospiraceae;Blautia;  
Bacteria;Firmicutes;Clostridia;Clostridiales;Lachnospiraceae;  
Bacteria;Firmicutes;Clostridia;Clostridiales;Lachnospiraceae;  
Bacteria;Firmicutes;Clostridia;Clostridiales;Ruminococcaceae;Butyricoccus;  
Bacteria;Firmicutes;Clostridia;Clostridiales;Lachnospiraceae;Blautia;  
Bacteria;Firmicutes;Clostridia;Clostridiales;Ruminococcaceae;Oscillospira;  
Bacteria;Bacteroidetes;Bacteroidia;Bacteroidales;Porphyromonadaceae;Barnesiella;  
Bacteria;Firmicutes;Clostridia;Clostridiales;Lachnospiraceae;  
Bacteria;Firmicutes;Clostridia;Clostridiales;Ruminococcaceae;Oscillospira;  
Bacteria;Firmicutes;Clostridia;Clostridiales;Ruminococcaceae;Oscillospira;  
Bacteria;Bacteroidetes;Bacteroidia;Bacteroidales;Porphyromonadaceae;Barnesiella;  
Bacteria;Firmicutes;Clostridia;Clostridiales;vadinBB60;  
Bacteria;Firmicutes;Clostridia;Clostridiales;Lachnospiraceae;Roseburia;  
Bacteria;Firmicutes;Clostridia;Clostridiales;Lachnospiraceae;Blautia;  
Bacteria;Firmicutes;Clostridia;Clostridiales;Lachnospiraceae;  
Bacteria;Bacteroidetes;Bacteroidia;Bacteroidales;Porphyromonadaceae;Odoribacter;  
Bacteria;Firmicutes;Clostridia;Clostridiales;Lachnospiraceae;Blautia;  
Bacteria;Firmicutes;Clostridia;Clostridiales;Lachnospiraceae;Blautia;  
Bacteria;Firmicutes;Bacilli;Lactobacillales;Lactobacillaceae;Lactobacillus;  
Bacteria;Bacteroidetes;Bacteroidia;Bacteroidales;Porphyromonadaceae;Barnesiella;



Bacteria;Firmicutes;Clostridia;Clostridiales;vadinBB60;  
Bacteria;Firmicutes;Clostridia;Clostridiales;Ruminococcaceae;Oscillospira;  
Bacteria;Firmicutes;Clostridia;Clostridiales;Lachnospiraceae;  
Bacteria;Bacteroidetes;Bacteroidia;Bacteroidales;Rikenellaceae;Alistipes;  
Bacteria;Bacteroidetes;Bacteroidia;Bacteroidales;Porphyromonadaceae;Barnesiella;  
Bacteria;Bacteroidetes;Bacteroidia;Bacteroidales;Rikenellaceae;Alistipes;  
Bacteria;Firmicutes;Clostridia;Clostridiales;Lachnospiraceae;  
Bacteria;Firmicutes;Clostridia;Clostridiales;Defluviitaleaceae;  
Bacteria;Firmicutes;Clostridia;Clostridiales;Lachnospiraceae;Blautia;  
Bacteria;Firmicutes;Clostridia;Clostridiales;Lachnospiraceae;  
Bacteria;Bacteroidetes;Bacteroidia;Bacteroidales;Rikenellaceae;Alistipes;  
Bacteria;Firmicutes;Clostridia;Clostridiales;Lachnospiraceae;  
Bacteria;Bacteroidetes;Bacteroidia;Bacteroidales;Porphyromonadaceae;Barnesiella;  
Bacteria;Firmicutes;Clostridia;Clostridiales;Ruminococcaceae;Oscillospira;  
Bacteria;Firmicutes;Clostridia;Clostridiales;Ruminococcaceae;Oscillospira;  
Bacteria;Bacteroidetes;Bacteroidia;Bacteroidales;Porphyromonadaceae;Barnesiella;  
Bacteria;Firmicutes;Clostridia;Clostridiales;Ruminococcaceae;Butyricoccus;  
Bacteria;Firmicutes;Clostridia;Clostridiales;Ruminococcaceae;Ruminococcus;  
Bacteria;Firmicutes;Clostridia;Clostridiales;Lachnospiraceae;Ruminococcus;gnavus;  
Bacteria;Firmicutes;Clostridia;Clostridiales;Lachnospiraceae;  
Bacteria;Firmicutes;Clostridia;Clostridiales;Lachnospiraceae;  
Bacteria;Firmicutes;Clostridia;Clostridiales;Lachnospiraceae;  
Bacteria;Firmicutes;Clostridia;Clostridiales;Ruminococcaceae;Oscillospira;  
Bacteria;Firmicutes;Clostridia;Clostridiales;Lachnospiraceae;  
Bacteria;Bacteroidetes;Bacteroidia;Bacteroidales;Porphyromonadaceae;Barnesiella;  
Bacteria;Firmicutes;Clostridia;Clostridiales;Lachnospiraceae;  
Bacteria;Firmicutes;Clostridia;Clostridiales;Lachnospiraceae;  
Bacteria;Firmicutes;Clostridia;Clostridiales;Lachnospiraceae;  
Bacteria;Firmicutes;Clostridia;Clostridiales;Lachnospiraceae;  
Bacteria;Firmicutes;Clostridia;Clostridiales;Lachnospiraceae;Blautia;  
Bacteria;Bacteroidetes;Bacteroidia;Bacteroidales;Porphyromonadaceae;Odoribacter;  
Bacteria;Firmicutes;Clostridia;Clostridiales;Ruminococcaceae;Anaerotruncus;  
Bacteria;Bacteroidetes;Bacteroidia;Bacteroidales;Bacteroidaceae;Bacteroides;  
Bacteria;Firmicutes;Clostridia;Clostridiales;Lachnospiraceae;Blautia;  
Bacteria;Firmicutes;Clostridia;Clostridiales;vadinBB60;  
Bacteria;Bacteroidetes;Bacteroidia;Bacteroidales;Porphyromonadaceae;Barnesiella;  
Bacteria;Bacteroidetes;Bacteroidia;Bacteroidales;Porphyromonadaceae;Barnesiella;  
Bacteria;Bacteroidetes;Bacteroidia;Bacteroidales;Rikenellaceae;Alistipes;  
Bacteria;Firmicutes;Clostridia;Clostridiales;Lachnospiraceae;Roseburia;  
Bacteria;Firmicutes;Clostridia;Clostridiales;Lachnospiraceae;  
Bacteria;Bacteroidetes;Bacteroidia;Bacteroidales;Rikenellaceae;Alistipes;  
Bacteria;Firmicutes;Clostridia;Clostridiales;Lachnospiraceae;Marvinbryantia;  
Bacteria;Firmicutes;Clostridia;Clostridiales;Lachnospiraceae;  
Bacteria;Tenericutes;Mollicutes;Anaeroplasmatales;Anaeroplasmataceae;Anaeroplasma;  
Bacteria;Firmicutes;Clostridia;Clostridiales;Lachnospiraceae;  
Bacteria;Bacteroidetes;Bacteroidia;Bacteroidales;Bacteroidaceae;Bacteroides;  
Bacteria;Firmicutes;Clostridia;Clostridiales;Lachnospiraceae;  
Bacteria;Proteobacteria;Deltaproteobacteria;Desulfovibrionales;Desulfovibrionaceae;Desulfovibrio;  
Bacteria;Firmicutes;Clostridia;Clostridiales;Lachnospiraceae;  
Bacteria;Firmicutes;Clostridia;Clostridiales;Lachnospiraceae;Roseburia;

Bacteria;Firmicutes;Clostridia;Clostridiales;Ruminococcaceae;  
Bacteria;Bacteroidetes;Bacteroidia;Bacteroidales;Porphyromonadaceae;Barnesiella;  
Bacteria;Firmicutes;Clostridia;Clostridiales;  
Bacteria;Firmicutes;Clostridia;Clostridiales;Lachnospiraceae;Roseburia;  
Bacteria;Bacteroidetes;Bacteroidia;Bacteroidales;Porphyromonadaceae;Barnesiella;  
Bacteria;Firmicutes;Clostridia;Clostridiales;Lachnospiraceae;  
Bacteria;Firmicutes;Clostridia;Clostridiales;Ruminococcaceae;Oscillospira;  
Bacteria;Bacteroidetes;Bacteroidia;Bacteroidales;Rikenellaceae;Alistipes;  
Bacteria;Firmicutes;Clostridia;Clostridiales;Ruminococcaceae;  
Bacteria;Firmicutes;Clostridia;Clostridiales;Lachnospiraceae;  
Bacteria;Firmicutes;Clostridia;Clostridiales;Lachnospiraceae;  
Bacteria;Firmicutes;Clostridia;Clostridiales;Lachnospiraceae;  
Bacteria;Firmicutes;Clostridia;Clostridiales;Ruminococcaceae;Oscillospira;  
Bacteria;Firmicutes;Clostridia;Clostridiales;Lachnospiraceae;  
Bacteria;Firmicutes;Clostridia;Clostridiales;Lachnospiraceae;
